# Supplementary material for: Health benefits attributed to 17α-estradiol, a lifespan-extending compound, are mediated through estrogen receptor α
Source: eLife journal article supplement (doi:10.7554/elife.59616), 2020-12-08
Supplement: supp [file elife-59616-supp-v1.zip]

Archive with 9 entries (9 files):
- elife_poa_e59616_Transparent_Reporting_File.docx
- elife_poa_e59616_Figure_1_figure_supplement_1.pdf
- elife_poa_e59616_Figure_3_figure_supplement_1.pdf
- elife_poa_e59616_Figure_3_figure_supplement_2.pdf
- elife_poa_e59616_Figure_4_figure_supplement_1.pdf
- elife_poa_e59616_Figure_4_figure_supplement_2.pdf
- elife_poa_e59616_Supplementary_file_1.xlsx
- elife_poa_e59616_Supplementary_file_2.xlsx
- elife_poa_e59616_Supplementary_file_3.xlsx
