# Supplementary material for: Health benefits attributed to 17α-estradiol, a lifespan-extending compound, are mediated through estrogen receptor α
Source: eLife journal article supplement (doi:10.7554/elife.59616), 2020-12-08
Supplement: supp [file elife-59616-supp-v1.zip › elife_poa_e59616_Supplementary_file_1.xlsx]

## Sheet: Veh vs 17α-E2(10nM)
seqnames	start	end	strand	Conc	Conc_17a_10nm	Conc_VEH	Fold	p.value	FDR
chr18	73415768	73416268	*	8.18	9.14	4.14	4.99	2.98e-19	8.98e-15
chr19	45852367	45852867	*	7.36	8.34	1.83	6.52	3.46e-18	4.19e-14
chr14	105628659	105629159	*	7.67	8.65	2.64	6.02	4.17e-18	4.19e-14
chr1	1342742	1343242	*	7.07	8.03	2.64	5.39	9.92e-17	7.48e-13
chr22	20243535	20244035	*	6.89	7.87	1.48	6.39	2.53e-16	1.52e-12
chr22	41865083	41865583	*	6.57	7.56	0.83	6.73	3.92e-16	1.52e-12
chr6	166795428	166795928	*	6.67	7.65	1.4	6.26	4.21e-16	1.52e-12
chr7	1270854	1271354	*	6.67	7.64	2.12	5.52	4.51e-16	1.52e-12
chr19	55685317	55685817	*	6.67	7.63	2.13	5.5	4.54e-16	1.52e-12
chr19	55953829	55954329	*	6.72	7.7	1.85	5.85	6.57e-16	1.98e-12
chr16	598403	598903	*	7.38	8.35	3.12	5.23	1.09e-15	2.72e-12
chr12	52267189	52267689	*	6.61	7.59	1.2	6.39	1.16e-15	2.72e-12
chr3	12329610	12330110	*	7.43	8.38	3.57	4.8	1.17e-15	2.72e-12
chr10	5726664	5727164	*	7.23	8.18	3.37	4.81	1.72e-15	3.55e-12
chr7	91763953	91764453	*	7	7.98	2.04	5.94	1.77e-15	3.55e-12
chr19	30364024	30364524	*	7.44	8.38	3.79	4.59	2.64e-15	4.76e-12
chr8	143065404	143065904	*	8.59	9.53	5.17	4.36	2.68e-15	4.76e-12
chr8	144657828	144658328	*	7.9	8.83	4.45	4.38	9.19e-15	1.49e-11
chr11	74021803	74022303	*	7.62	8.55	4.04	4.51	9.38e-15	1.49e-11
chr9	130516978	130517478	*	7.64	8.59	3.91	4.68	1.34e-14	1.97e-11
chr17	79410314	79410814	*	6.59	7.58	1.33	6.24	1.37e-14	1.97e-11
chr17	76265667	76266167	*	6.56	7.54	1.32	6.22	1.49e-14	1.98e-11
chr17	37773961	37774461	*	7.3	8.28	2.21	6.07	1.51e-14	1.98e-11
chr14	106083255	106083755	*	6.5	7.47	1.99	5.48	1.76e-14	2.21e-11
chr1	36273896	36274396	*	6.74	7.72	1.59	6.14	1.96e-14	2.37e-11
chr19	35491116	35491616	*	6.62	7.59	1.87	5.72	2.08e-14	2.41e-11
chr1	53874087	53874587	*	6.08	7.06	0.84	6.22	2.38e-14	2.66e-11
chr9	139560195	139560695	*	6.5	7.49	-0.29	7.78	2.85e-14	3.07e-11
chr7	5328990	5329490	*	6.32	7.3	1.29	6.01	3.06e-14	3.18e-11
chr17	57970598	57971098	*	6.44	7.41	1.77	5.65	5.3e-14	5.31e-11
chr3	48610367	48610867	*	5.91	6.89	0.83	6.06	5.46e-14	5.31e-11
chr16	2524309	2524809	*	6.71	7.69	1.59	6.1	6.04e-14	5.69e-11
chr16	701543	702043	*	6.26	7.24	1.1	6.14	6.77e-14	6.19e-11
chr11	67033011	67033511	*	6.9	7.84	3.26	4.59	7.56e-14	6.71e-11
chr8	27527987	27528487	*	6.03	7.01	1.04	5.97	8.43e-14	7.27e-11
chr1	21948548	21949048	*	7.58	8.52	4	4.52	1.68e-13	1.41e-10
chr19	18060714	18061214	*	6.28	7.26	1.01	6.25	2.44e-13	1.99e-10
chr17	79268445	79268945	*	6.18	7.15	1.58	5.58	2.74e-13	2.12e-10
chr7	2671730	2672230	*	8.15	9.06	5.17	3.89	2.75e-13	2.12e-10
chr17	72876911	72877411	*	6.07	7.04	1.37	5.67	3.85e-13	2.88e-10
chr17	62066383	62066883	*	6.28	7.23	2.16	5.07	3.91e-13	2.88e-10
chr15	77320051	77320551	*	6.23	7.22	-0.29	7.52	5.6e-13	4.02e-10
chr1	153467572	153468072	*	5.88	6.84	1.6	5.25	6.09e-13	4.27e-10
chr22	24166219	24166719	*	5.97	6.94	1.46	5.48	7.62e-13	5.13e-10
chr19	41117995	41118495	*	8.04	8.97	4.63	4.35	7.65e-13	5.13e-10
chr7	44572923	44573423	*	6.2	7.17	1.42	5.75	8.07e-13	5.29e-10
chr22	50244149	50244649	*	6.43	7.4	2.15	5.25	8.35e-13	5.36e-10
chr19	3203997	3204497	*	6.33	7.29	2.06	5.23	9.16e-13	5.51e-10
chr20	3002550	3003050	*	6.17	7.11	2.45	4.65	9.3e-13	5.51e-10
chr17	77385949	77386449	*	6.53	7.46	3.06	4.4	9.31e-13	5.51e-10
chr16	1829955	1830455	*	6.24	7.2	2.02	5.18	9.32e-13	5.51e-10
chr20	35401803	35402303	*	5.98	6.97	-0.29	7.26	1.01e-12	5.84e-10
chr2	233511648	233512148	*	6.13	7.08	1.99	5.1	1.13e-12	6.42e-10
chr1	65720255	65720755	*	7.03	7.96	3.58	4.39	1.19e-12	6.66e-10
chr22	46528616	46529116	*	5.94	6.89	2.13	4.75	1.25e-12	6.84e-10
chr6	3751623	3752123	*	7.84	8.76	4.64	4.12	1.34e-12	7.24e-10
chr19	36269066	36269566	*	5.88	6.85	1.34	5.51	1.39e-12	7.37e-10
chr12	109250649	109251149	*	6.28	7.23	2.44	4.79	1.69e-12	8.65e-10
chr16	2568575	2569075	*	7.45	8.36	4.27	4.09	1.7e-12	8.65e-10
chr17	39823451	39823951	*	6.68	7.62	3.1	4.53	1.73e-12	8.65e-10
chr2	241405146	241405646	*	7.11	8.03	3.82	4.21	1.75e-12	8.65e-10
chr22	43544562	43545062	*	7.18	8.11	3.85	4.27	2.16e-12	1.05e-09
chr5	150004653	150005153	*	6.28	7.24	2.07	5.16	2.28e-12	1.09e-09
chr22	50693001	50693501	*	5.83	6.82	0.08	6.74	2.46e-12	1.16e-09
chr5	893133	893633	*	7.06	7.98	3.89	4.09	2.59e-12	1.18e-09
chr8	144094803	144095303	*	5.84	6.81	1.33	5.48	2.59e-12	1.18e-09
chr17	60781038	60781538	*	7.51	8.47	3.13	5.34	2.69e-12	1.21e-09
chr11	66495334	66495834	*	6.21	7.17	1.89	5.28	3.43e-12	1.52e-09
chr15	76018649	76019149	*	5.93	6.92	-0.29	7.21	3.49e-12	1.52e-09
chr20	62689345	62689845	*	5.85	6.82	0.83	5.99	3.67e-12	1.58e-09
chr22	23628211	23628711	*	6.45	7.37	3.18	4.2	3.81e-12	1.58e-09
chr1	16368217	16368717	*	7.35	8.3	3.5	4.8	3.82e-12	1.58e-09
chr8	143533860	143534360	*	5.84	6.83	-0.29	7.12	3.83e-12	1.58e-09
chr9	129294551	129295051	*	5.67	6.64	0.83	5.81	3.99e-12	1.59e-09
chr16	68278472	68278972	*	6.17	7.14	1.59	5.56	4.02e-12	1.59e-09
chr19	5783296	5783796	*	6.33	7.28	2.46	4.82	4.02e-12	1.59e-09
chr11	47374297	47374797	*	5.82	6.81	-0.29	7.1	4.07e-12	1.59e-09
chr19	55678516	55679016	*	5.73	6.71	-0.29	7.01	4.36e-12	1.69e-09
chr11	65292495	65292995	*	8.39	9.3	5.32	3.98	4.74e-12	1.81e-09
chr11	9685618	9686118	*	6.27	7.23	2.07	5.16	4.95e-12	1.87e-09
chr15	68849526	68850026	*	6.99	7.92	3.58	4.34	5.1e-12	1.9e-09
chr1	10733996	10734496	*	6.87	7.8	3.42	4.38	5.33e-12	1.96e-09
chr20	60895731	60896231	*	7.86	8.76	4.97	3.79	6.16e-12	2.21e-09
chr22	45824471	45824971	*	6.72	7.65	3.47	4.17	6.17e-12	2.21e-09
chr16	2033568	2034068	*	5.8	6.76	1.58	5.18	6.46e-12	2.28e-09
chr2	71215191	71215691	*	5.73	6.7	1.1	5.59	6.61e-12	2.28e-09
chr13	114565627	114566127	*	5.89	6.88	-0.29	7.17	6.62e-12	2.28e-09
chr8	145049200	145049700	*	5.89	6.88	-0.29	7.17	6.66e-12	2.28e-09
chr10	80972603	80973103	*	6.52	7.46	2.91	4.55	7.79e-12	2.63e-09
chr22	50345784	50346284	*	6.75	7.68	3.26	4.42	7.84e-12	2.63e-09
chr17	30629900	30630400	*	7.58	8.48	4.66	3.83	8.17e-12	2.66e-09
chr17	2615433	2615933	*	7.23	8.15	4.01	4.14	8.17e-12	2.66e-09
chr8	59465408	59465908	*	6.55	7.48	3.08	4.4	8.27e-12	2.66e-09
chr16	851546	852046	*	6.33	7.28	2.36	4.92	8.47e-12	2.66e-09
chr5	1241327	1241827	*	5.49	6.46	0.63	5.83	8.53e-12	2.66e-09
chr7	44646427	44646927	*	5.57	6.54	0.83	5.71	8.55e-12	2.66e-09
chr7	2353469	2353969	*	5.83	6.78	1.7	5.08	8.56e-12	2.66e-09
chr8	142443521	142444021	*	6.63	7.55	3.24	4.32	8.71e-12	2.68e-09
chr16	11767168	11767668	*	5.65	6.63	0.57	6.06	8.99e-12	2.74e-09
chr8	22423422	22423922	*	5.69	6.68	-0.29	6.97	9.12e-12	2.74e-09
chr7	2443283	2443783	*	5.74	6.73	-0.29	7.02	9.18e-12	2.74e-09
chr10	46993618	46994118	*	6.39	7.34	2.5	4.84	9.51e-12	2.81e-09
chr8	98881523	98882023	*	6.32	7.29	1.9	5.39	9.83e-12	2.86e-09
chr9	99328687	99329187	*	6.23	7.19	2.26	4.93	9.86e-12	2.86e-09
chr17	48618869	48619369	*	6.71	7.68	2.14	5.54	1.12e-11	3.22e-09
chr2	131850462	131850962	*	8.14	9.04	5.1	3.94	1.15e-11	3.27e-09
chr15	22502610	22503110	*	5.47	6.44	0.84	5.61	1.17e-11	3.3e-09
chr16	85321760	85322260	*	5.77	6.74	0.83	5.91	1.21e-11	3.37e-09
chr20	60941675	60942175	*	5.77	6.76	-0.29	7.05	1.26e-11	3.5e-09
chr19	5030119	5030619	*	6.31	7.24	2.79	4.46	1.37e-11	3.76e-09
chr2	241330673	241331173	*	5.56	6.53	1.02	5.5	1.43e-11	3.88e-09
chr16	33956929	33957429	*	7.9	8.81	4.86	3.95	1.48e-11	3.98e-09
chr4	1761899	1762399	*	6.7	7.62	3.44	4.18	1.52e-11	4.05e-09
chr16	75273419	75273919	*	6.9	7.83	3.59	4.24	1.56e-11	4.13e-09
chr4	2061941	2062441	*	5.49	6.47	0.38	6.09	1.58e-11	4.14e-09
chr19	33667411	33667911	*	6.03	7	1.58	5.42	1.72e-11	4.45e-09
chr17	74522421	74522921	*	5.63	6.6	0.62	5.98	1.72e-11	4.45e-09
chr1	151773211	151773711	*	5.61	6.59	0.57	6.02	1.89e-11	4.81e-09
chr8	142329127	142329627	*	9.26	10.15	6.53	3.62	1.9e-11	4.81e-09
chr3	47619295	47619795	*	6.45	7.42	2.15	5.27	1.92e-11	4.81e-09
chr4	1769305	1769805	*	6.11	7.05	2.4	4.65	2.01e-11	5e-09
chr17	73739716	73740216	*	5.89	6.85	1.75	5.1	2.1e-11	5.19e-09
chr2	241529685	241530185	*	5.42	6.41	0.08	6.33	2.12e-11	5.21e-09
chr17	42835617	42836117	*	6.69	7.65	2.57	5.08	2.14e-11	5.21e-09
chr2	224903410	224903910	*	7.27	8.17	4.41	3.76	2.17e-11	5.23e-09
chr2	46926335	46926835	*	6.38	7.33	2.37	4.97	2.22e-11	5.27e-09
chr19	42789410	42789910	*	5.62	6.58	1.29	5.29	2.25e-11	5.27e-09
chr21	47422134	47422634	*	5.78	6.71	2.47	4.24	2.25e-11	5.27e-09
chr19	1483820	1484320	*	5.63	6.59	1.55	5.04	2.26e-11	5.27e-09
chr17	4462264	4462764	*	6.06	7.03	1.58	5.45	2.3e-11	5.33e-09
chr11	776654	777154	*	5.36	6.33	0.57	5.77	2.32e-11	5.34e-09
chr22	42218428	42218928	*	6.22	7.18	1.8	5.38	2.41e-11	5.5e-09
chr14	65512720	65513220	*	5.8	6.79	-0.29	7.08	2.45e-11	5.53e-09
chr1	1443699	1444199	*	5.48	6.47	-0.29	6.76	2.46e-11	5.53e-09
chr1	228327958	228328458	*	6.85	7.76	3.78	3.98	2.51e-11	5.6e-09
chr12	132338702	132339202	*	5.77	6.74	1.01	5.73	2.67e-11	5.91e-09
chr1	3369881	3370381	*	5.76	6.75	-0.29	7.04	2.9e-11	6.39e-09
chr8	142195027	142195527	*	5.53	6.51	-0.29	6.81	3.04e-11	6.63e-09
chr9	137363717	137364217	*	5.59	6.58	-0.29	6.87	3.14e-11	6.8e-09
chr10	134809722	134810222	*	7.18	8.1	3.97	4.13	3.2e-11	6.89e-09
chr19	16142340	16142840	*	7.24	8.13	4.42	3.71	3.28e-11	7e-09
chr1	31196295	31196795	*	7.63	8.53	4.82	3.71	3.29e-11	7e-09
chr9	139409545	139410045	*	5.43	6.4	0.79	5.61	3.45e-11	7.27e-09
chr5	1654166	1654666	*	5.6	6.59	-0.29	6.88	3.6e-11	7.54e-09
chr21	46412426	46412926	*	6.56	7.47	3.5	3.97	3.64e-11	7.54e-09
chr12	125576994	125577494	*	6.64	7.55	3.65	3.89	3.65e-11	7.54e-09
chr7	101006987	101007487	*	6.02	6.99	1.59	5.4	3.74e-11	7.63e-09
chr19	51293967	51294467	*	5.44	6.42	0.08	6.34	3.75e-11	7.63e-09
chr19	3820610	3821110	*	6.89	7.82	3.54	4.27	4.06e-11	8.21e-09
chr1	1840041	1840541	*	6.32	7.28	2.3	4.97	4.12e-11	8.28e-09
chr9	139727874	139728374	*	6.16	7.11	2.34	4.77	4.15e-11	8.28e-09
chr11	67784694	67785194	*	7.85	8.74	5.09	3.65	4.21e-11	8.36e-09
chr17	75296833	75297333	*	7.6	8.5	4.74	3.75	4.48e-11	8.83e-09
chr22	38084688	38085188	*	6.99	7.9	3.93	3.97	4.55e-11	8.91e-09
chr1	7830957	7831457	*	5.65	6.61	1.57	5.04	4.61e-11	8.97e-09
chr9	140056577	140057077	*	6.54	7.48	2.98	4.5	4.68e-11	9.04e-09
chr19	10544023	10544523	*	5.42	6.4	0.38	6.02	4.81e-11	9.23e-09
chr5	53813697	53814197	*	6	6.96	1.69	5.27	4.87e-11	9.3e-09
chr6	11737612	11738112	*	7.21	8.12	4.11	4.01	4.92e-11	9.33e-09
chr3	125844761	125845261	*	6	6.94	2.4	4.54	4.96e-11	9.35e-09
chr19	18577146	18577646	*	6	6.93	2.56	4.37	5.03e-11	9.43e-09
chr22	38329164	38329664	*	5.54	6.52	-0.29	6.82	5.17e-11	9.62e-09
chr12	122670143	122670643	*	5.4	6.36	1.32	5.04	5.2e-11	9.62e-09
chr19	7917713	7918213	*	5.7	6.65	2	4.65	5.45e-11	9.97e-09
chr9	140328105	140328605	*	5.65	6.62	0.86	5.76	5.45e-11	9.97e-09
chr4	184365246	184365746	*	6.72	7.64	3.47	4.17	5.52e-11	1e-08
chr11	69390796	69391296	*	5.71	6.65	2.03	4.62	5.63e-11	1.02e-08
chr18	12038457	12038957	*	7.42	8.37	3.43	4.94	5.74e-11	1.03e-08
chr22	23412511	23413011	*	8.44	9.32	5.83	3.49	5.81e-11	1.04e-08
chr5	14582161	14582661	*	6.44	7.37	2.99	4.37	6.14e-11	1.09e-08
chr7	2472041	2472541	*	5.61	6.57	1.32	5.25	6.18e-11	1.09e-08
chr16	1832188	1832688	*	5.6	6.59	-0.29	6.88	6.55e-11	1.15e-08
chr16	2111498	2111998	*	5.9	6.87	1.69	5.18	6.62e-11	1.15e-08
chr19	51628864	51629364	*	5.72	6.7	0.38	6.33	6.63e-11	1.15e-08
chr3	127371859	127372359	*	6.76	7.69	3.44	4.25	6.86e-11	1.18e-08
chr7	2720307	2720807	*	5.48	6.45	0.97	5.47	7.29e-11	1.25e-08
chr7	1685099	1685599	*	5.37	6.36	-0.29	6.65	7.43e-11	1.26e-08
chr5	180621433	180621933	*	5.47	6.45	0.63	5.82	7.44e-11	1.26e-08
chr20	62685445	62685945	*	5.55	6.54	-0.29	6.83	8.07e-11	1.35e-08
chr21	46740941	46741441	*	5.78	6.74	1.32	5.42	8.11e-11	1.35e-08
chr19	18699489	18699989	*	6.38	7.31	3.07	4.24	8.13e-11	1.35e-08
chr7	98971540	98972040	*	5.17	6.14	0.83	5.3	8.14e-11	1.35e-08
chr22	37701723	37702223	*	5.89	6.86	1.31	5.55	8.46e-11	1.39e-08
chr17	41855850	41856350	*	6.52	7.45	3.08	4.37	8.67e-11	1.42e-08
chr9	139231761	139232261	*	5.53	6.5	0.98	5.52	8.92e-11	1.45e-08
chr22	46448690	46449190	*	5.87	6.84	1.33	5.51	9.05e-11	1.47e-08
chr18	76814608	76815108	*	5.49	6.45	1.18	5.27	9.75e-11	1.57e-08
chrX	47041186	47041686	*	5.52	6.48	1.18	5.3	9.98e-11	1.6e-08
chr16	85715906	85716406	*	7.08	8	3.81	4.19	1.01e-10	1.6e-08
chr1	9404792	9405292	*	5.46	6.44	0.62	5.82	1.01e-10	1.6e-08
chr21	45235744	45236244	*	6.4	7.31	3.26	4.05	1.03e-10	1.62e-08
chr2	234726526	234727026	*	6.28	7.2	2.91	4.29	1.03e-10	1.62e-08
chr14	75536292	75536792	*	6.52	7.44	3.33	4.1	1.06e-10	1.65e-08
chr2	219289059	219289559	*	5.5	6.46	1.24	5.22	1.07e-10	1.67e-08
chr19	7594436	7594936	*	6.29	7.22	2.92	4.3	1.09e-10	1.68e-08
chr22	19462200	19462700	*	6.63	7.56	3.21	4.35	1.1e-10	1.69e-08
chr12	122238156	122238656	*	6.65	7.58	3.24	4.34	1.13e-10	1.72e-08
chr22	46509460	46509960	*	6.43	7.39	2.14	5.25	1.13e-10	1.72e-08
chr8	22433995	22434495	*	7.09	8	4.13	3.87	1.15e-10	1.74e-08
chr6	693619	694119	*	5.82	6.77	1.89	4.88	1.16e-10	1.74e-08
chr20	62284170	62284670	*	5.44	6.39	1.75	4.64	1.16e-10	1.74e-08
chr20	62197309	62197809	*	5.48	6.47	-0.29	6.76	1.17e-10	1.75e-08
chr20	61163488	61163988	*	6.17	7.11	2.66	4.45	1.18e-10	1.76e-08
chr9	137533756	137534256	*	6.68	7.61	3.23	4.38	1.19e-10	1.76e-08
chr19	36207504	36208004	*	7.53	8.44	4.5	3.94	1.25e-10	1.85e-08
chr5	180015473	180015973	*	5.49	6.42	2.03	4.39	1.28e-10	1.88e-08
chr7	45721204	45721704	*	5.46	6.45	-0.29	6.74	1.32e-10	1.92e-08
chr7	1481062	1481562	*	7.87	8.76	5.17	3.58	1.33e-10	1.93e-08
chr2	133025469	133025969	*	7.75	8.67	4.43	4.24	1.34e-10	1.94e-08
chr19	51843222	51843722	*	6.88	7.81	3.64	4.17	1.38e-10	1.97e-08
chr16	89784006	89784506	*	6.59	7.51	3.42	4.08	1.38e-10	1.97e-08
chr19	995064	995564	*	5.52	6.47	1.46	5.02	1.41e-10	2.01e-08
chr16	89033977	89034477	*	5.23	6.19	0.84	5.36	1.43e-10	2.03e-08
chr7	73402343	73402843	*	6.39	7.31	3.23	4.08	1.46e-10	2.06e-08
chr1	51778058	51778558	*	7.11	8.02	4.01	4.01	1.48e-10	2.07e-08
chr16	85176952	85177452	*	5.25	6.22	0.48	5.75	1.48e-10	2.07e-08
chr19	41726936	41727436	*	6.16	7.12	1.8	5.32	1.6e-10	2.21e-08
chr7	2518201	2518701	*	5.39	6.36	0.9	5.46	1.6e-10	2.21e-08
chr15	69591089	69591589	*	5.71	6.66	1.92	4.74	1.61e-10	2.21e-08
chr22	36957539	36958039	*	6.49	7.42	3.16	4.26	1.62e-10	2.21e-08
chr16	89251066	89251566	*	6.3	7.22	3.22	4	1.69e-10	2.31e-08
chr16	28614652	28615152	*	5.27	6.23	0.84	5.39	1.74e-10	2.36e-08
chr18	12252968	12253468	*	5.13	6.11	0.08	6.03	1.75e-10	2.37e-08
chr3	184287611	184288111	*	5.32	6.3	0.2	6.1	1.77e-10	2.38e-08
chr8	143690506	143691006	*	6.1	7.03	2.72	4.32	1.83e-10	2.45e-08
chr1	1837594	1838094	*	6.16	7.1	2.52	4.58	1.89e-10	2.52e-08
chr1	31192373	31192873	*	5.53	6.48	1.57	4.91	1.93e-10	2.57e-08
chr19	989380	989880	*	6.91	7.82	3.94	3.88	1.96e-10	2.59e-08
chr22	19737234	19737734	*	8.05	8.95	5.13	3.82	1.97e-10	2.59e-08
chr19	35155169	35155669	*	6.29	7.21	3.07	4.14	2e-10	2.62e-08
chr22	50242826	50243326	*	5.71	6.63	2.44	4.19	2.13e-10	2.78e-08
chr22	46449509	46450009	*	5.94	6.87	2.56	4.31	2.21e-10	2.88e-08
chr8	144637548	144638048	*	7.92	8.8	5.21	3.59	2.3e-10	2.96e-08
chr11	61528000	61528500	*	7.35	8.26	4.15	4.11	2.3e-10	2.96e-08
chr17	76274651	76275151	*	6.53	7.45	3.34	4.11	2.32e-10	2.98e-08
chr22	46339128	46339628	*	5.43	6.42	-0.29	6.71	2.36e-10	3e-08
chr22	49935320	49935820	*	5.25	6.23	0.2	6.02	2.36e-10	3e-08
chr10	134269833	134270333	*	5.31	6.26	1.55	4.71	2.45e-10	3.11e-08
chr19	1158746	1159246	*	6.35	7.25	3.5	3.75	2.5e-10	3.15e-08
chr18	77143718	77144218	*	7.25	8.16	4.24	3.91	2.55e-10	3.2e-08
chr3	52547761	52548261	*	5.99	6.95	1.79	5.16	2.67e-10	3.34e-08
chr1	3002277	3002777	*	7.06	7.97	4.09	3.87	2.74e-10	3.41e-08
chr5	49505	50005	*	8.49	9.39	5.67	3.72	2.75e-10	3.41e-08
chr14	65701341	65701841	*	5.55	6.5	1.4	5.11	2.89e-10	3.56e-08
chr22	50326564	50327064	*	7.42	8.34	4.3	4.04	2.9e-10	3.56e-08
chr20	44642528	44643028	*	5.26	6.24	0.08	6.16	2.9e-10	3.56e-08
chr22	46506450	46506950	*	6.58	7.48	3.72	3.75	2.96e-10	3.61e-08
chr9	133281037	133281537	*	6.68	7.61	3.36	4.25	3.04e-10	3.69e-08
chr22	19863759	19864259	*	5.33	6.31	-0.29	6.6	3.05e-10	3.7e-08
chr17	17762491	17762991	*	5.71	6.65	1.92	4.73	3.11e-10	3.75e-08
chr16	52438666	52439166	*	5.53	6.48	1.8	4.68	3.14e-10	3.77e-08
chr19	45667902	45668402	*	5.84	6.78	2.15	4.63	3.16e-10	3.78e-08
chr9	139520059	139520559	*	6.93	7.84	3.87	3.97	3.21e-10	3.83e-08
chr8	143500015	143500515	*	7.07	7.95	4.45	3.5	3.23e-10	3.84e-08
chr13	113969211	113969711	*	5.48	6.44	1.32	5.12	3.26e-10	3.85e-08
chr1	228561021	228561521	*	5.38	6.34	1.18	5.16	3.33e-10	3.92e-08
chr1	31654344	31654844	*	5.73	6.69	1.33	5.36	3.37e-10	3.95e-08
chr10	134728879	134729379	*	5.71	6.66	1.66	5	3.39e-10	3.96e-08
chr1	32660523	32661023	*	7.35	8.26	4.33	3.93	3.42e-10	3.97e-08
chr17	79096749	79097249	*	6.02	6.93	2.87	4.07	3.44e-10	3.97e-08
chr16	2255945	2256445	*	7.17	8.06	4.45	3.61	3.44e-10	3.97e-08
chr17	62017500	62018000	*	5.25	6.22	0.83	5.39	3.49e-10	4.02e-08
chr2	220417435	220417935	*	7.11	7.99	4.4	3.59	3.52e-10	4.04e-08
chr1	2245067	2245567	*	6.79	7.68	3.93	3.75	3.8e-10	4.34e-08
chr20	44001659	44002159	*	5.33	6.31	-0.29	6.6	3.82e-10	4.35e-08
chr1	33815605	33816105	*	6	6.96	1.96	5	3.89e-10	4.4e-08
chr12	5726094	5726594	*	6.31	7.24	3.01	4.23	3.9e-10	4.4e-08
chr5	132784631	132785131	*	6.08	6.99	2.91	4.09	3.96e-10	4.45e-08
chr11	65293712	65294212	*	7.97	8.84	5.4	3.44	4.06e-10	4.56e-08
chr22	18917752	18918252	*	5.63	6.57	1.95	4.62	4.08e-10	4.56e-08
chr2	130672578	130673078	*	8.39	9.27	5.65	3.62	4.15e-10	4.62e-08
chr17	48626826	48627326	*	7.71	8.62	4.66	3.96	4.17e-10	4.62e-08
chr20	61152001	61152501	*	5.31	6.29	0.38	5.91	4.26e-10	4.68e-08
chr5	1163936	1164436	*	5.24	6.22	-0.29	6.51	4.26e-10	4.68e-08
chr11	64677458	64677958	*	5.32	6.3	-0.29	6.59	4.28e-10	4.68e-08
chr16	3213380	3213880	*	5.83	6.79	1.71	5.08	4.29e-10	4.68e-08
chr12	6371215	6371715	*	5.95	6.88	2.54	4.34	4.34e-10	4.72e-08
chr7	5459841	5460341	*	5.38	6.34	1.24	5.11	4.42e-10	4.78e-08
chr16	711400	711900	*	5.27	6.24	0.83	5.41	4.43e-10	4.78e-08
chr11	67173355	67173855	*	7.93	8.83	5.04	3.78	4.49e-10	4.83e-08
chr1	156086931	156087431	*	5.92	6.87	1.8	5.07	4.5e-10	4.83e-08
chr9	124535972	124536472	*	5.06	6.02	0.83	5.19	4.56e-10	4.88e-08
chr2	241926158	241926658	*	5.18	6.14	0.9	5.23	4.58e-10	4.88e-08
chrX	48911461	48911961	*	6.35	7.31	2.16	5.15	4.61e-10	4.89e-08
chr11	76917085	76917585	*	5.69	6.62	2.24	4.38	4.7e-10	4.97e-08
chr20	37499588	37500088	*	5.23	6.19	1.04	5.15	4.86e-10	5.12e-08
chr1	150521981	150522481	*	8.49	9.35	6.09	3.26	4.91e-10	5.16e-08
chr20	61592417	61592917	*	5.17	6.12	1.38	4.74	4.97e-10	5.2e-08
chr20	39591318	39591818	*	5.14	6.13	-0.29	6.42	5.08e-10	5.3e-08
chr11	113962553	113963053	*	5.61	6.56	1.68	4.88	5.12e-10	5.32e-08
chr11	1716894	1717394	*	5.23	6.2	0.84	5.36	5.37e-10	5.57e-08
chr7	566356	566856	*	6.39	7.29	3.55	3.74	5.41e-10	5.59e-08
chr17	42856402	42856902	*	5.53	6.47	1.74	4.73	5.59e-10	5.74e-08
chr1	2527579	2528079	*	5.55	6.5	1.58	4.92	5.6e-10	5.74e-08
chr7	2668077	2668577	*	5.11	6.07	0.83	5.24	5.69e-10	5.82e-08
chr5	1654938	1655438	*	5.25	6.2	1.46	4.74	5.73e-10	5.83e-08
chr19	3094738	3095238	*	6.73	7.62	4.02	3.59	5.74e-10	5.83e-08
chr19	50909659	50910159	*	7.14	8.05	4.11	3.94	6.12e-10	6.19e-08
chr9	101558348	101558848	*	5.7	6.62	2.52	4.09	6.22e-10	6.28e-08
chr1	1617910	1618410	*	5.21	6.19	-0.29	6.49	6.25e-10	6.28e-08
chr20	60824729	60825229	*	5.16	6.14	0.2	5.94	6.27e-10	6.28e-08
chr14	101345219	101345719	*	6.23	7.15	3.11	4.03	6.38e-10	6.37e-08
chr22	49484590	49485090	*	5.18	6.17	-0.29	6.46	6.48e-10	6.43e-08
chr17	73835791	73836291	*	5.39	6.33	1.8	4.53	6.48e-10	6.43e-08
chr3	52379440	52379940	*	5.34	6.32	0.62	5.7	6.61e-10	6.54e-08
chr1	27790398	27790898	*	5.13	6.1	0.57	5.53	6.71e-10	6.62e-08
chr22	20108096	20108596	*	7.41	8.32	4.39	3.92	7.36e-10	7.23e-08
chr1	155717862	155718362	*	5.19	6.17	0.08	6.09	7.38e-10	7.23e-08
chr8	144472219	144472719	*	8.81	9.69	6.21	3.47	7.55e-10	7.37e-08
chr5	748761	749261	*	6.11	7.05	2.37	4.68	7.7e-10	7.46e-08
chr19	54849364	54849864	*	5.35	6.32	1.02	5.29	7.7e-10	7.46e-08
chr17	81027832	81028332	*	7.07	7.97	4.05	3.92	7.75e-10	7.49e-08
chr10	72438101	72438601	*	5.27	6.22	1.34	4.87	7.89e-10	7.6e-08
chr16	3067431	3067931	*	5.54	6.5	1.32	5.18	7.94e-10	7.62e-08
chr5	665006	665506	*	7.4	8.28	4.77	3.51	7.97e-10	7.62e-08
chr8	142433345	142433845	*	5.58	6.55	1.01	5.53	7.98e-10	7.62e-08
chr15	44281908	44282408	*	7.2	8.09	4.39	3.7	8.17e-10	7.76e-08
chr22	31276830	31277330	*	5.05	6.01	1.01	5	8.18e-10	7.76e-08
chr19	29583890	29584390	*	5.71	6.61	2.75	3.86	8.31e-10	7.85e-08
chr4	1757219	1757719	*	5.12	6.08	0.83	5.25	8.33e-10	7.85e-08
chr20	62134233	62134733	*	5.79	6.7	2.6	4.11	8.4e-10	7.89e-08
chr11	111170075	111170575	*	6.79	7.72	3.34	4.38	8.49e-10	7.91e-08
chr2	29272467	29272967	*	5.9	6.84	2.23	4.62	8.49e-10	7.91e-08
chr4	2364762	2365262	*	5.63	6.57	2.06	4.5	8.5e-10	7.91e-08
chr20	62597576	62598076	*	5.17	6.15	0.38	5.77	8.58e-10	7.96e-08
chr20	39772952	39773452	*	4.98	5.96	-0.29	6.25	8.6e-10	7.96e-08
chr5	178157006	178157506	*	5.1	6.09	-0.29	6.38	8.7e-10	8.02e-08
chr7	158031182	158031682	*	5.03	6	0.38	5.63	8.81e-10	8.1e-08
chr19	1396256	1396756	*	5.08	6.06	-0.29	6.35	9.14e-10	8.38e-08
chr16	85636270	85636770	*	6.12	7.05	2.71	4.34	9.37e-10	8.52e-08
chr7	1582630	1583130	*	5.39	6.35	1.01	5.34	9.39e-10	8.52e-08
chr5	533616	534116	*	5.52	6.48	1.1	5.38	9.45e-10	8.52e-08
chr20	61714917	61715417	*	5.05	6.01	1.02	4.99	9.46e-10	8.52e-08
chr22	50220561	50221061	*	6.98	7.92	3.42	4.5	9.48e-10	8.52e-08
chr7	98968722	98969222	*	5.32	6.31	-0.29	6.6	9.49e-10	8.52e-08
chr20	61675346	61675846	*	7.87	8.74	5.32	3.42	9.5e-10	8.52e-08
chr17	60704879	60705379	*	6.51	7.45	2.78	4.68	9.55e-10	8.54e-08
chr2	131512490	131512990	*	5.13	6.09	0.86	5.23	1e-09	8.91e-08
chr17	78080976	78081476	*	6.81	7.69	4.18	3.5	1e-09	8.91e-08
chr1	205274050	205274550	*	5.03	6	0.38	5.61	1.01e-09	8.91e-08
chr9	139027098	139027598	*	5.76	6.68	2.58	4.09	1.01e-09	8.93e-08
chr1	2446211	2446711	*	6	6.9	3.02	3.88	1.02e-09	8.96e-08
chr8	28627705	28628205	*	5.26	6.24	0.2	6.03	1.02e-09	8.99e-08
chr12	50422386	50422886	*	5.81	6.74	2.52	4.22	1.03e-09	9e-08
chr10	70748526	70749026	*	6.34	7.3	2.14	5.15	1.03e-09	9.04e-08
chr19	674153	674653	*	5.17	6.13	1.18	4.94	1.04e-09	9.08e-08
chr20	30522961	30523461	*	5.46	6.38	2.25	4.13	1.04e-09	9.08e-08
chr12	133050953	133051453	*	5.13	6.09	0.83	5.26	1.07e-09	9.28e-08
chr2	85829638	85830138	*	5.12	6.1	-0.29	6.4	1.08e-09	9.31e-08
chr11	67040683	67041183	*	6.13	7.04	3.04	4	1.09e-09	9.37e-08
chr19	4063100	4063600	*	5.78	6.71	2.46	4.25	1.1e-09	9.46e-08
chr9	135973506	135974006	*	5.01	5.99	-0.29	6.28	1.13e-09	9.7e-08
chr10	43870960	43871460	*	5.36	6.32	1.32	5	1.14e-09	9.71e-08
chr1	11786480	11786980	*	5.16	6.15	-0.29	6.44	1.14e-09	9.71e-08
chr22	36833183	36833683	*	6.12	7.01	3.36	3.65	1.14e-09	9.71e-08
chr1	1092069	1092569	*	6.4	7.3	3.57	3.72	1.18e-09	9.99e-08
chr22	50495801	50496301	*	7.3	8.18	4.63	3.55	1.18e-09	9.99e-08
chr16	1997034	1997534	*	5.09	6.07	0.2	5.87	1.22e-09	1.03e-07
chr7	2538848	2539348	*	5.16	6.14	-0.29	6.44	1.26e-09	1.06e-07
chr15	42127196	42127696	*	6.2	7.14	2.74	4.4	1.29e-09	1.08e-07
chr22	28209606	28210106	*	5.51	6.48	0.98	5.5	1.29e-09	1.08e-07
chr16	823812	824312	*	4.91	5.88	0.38	5.5	1.32e-09	1.1e-07
chr7	75623487	75623987	*	6.08	7.01	2.73	4.28	1.34e-09	1.1e-07
chr7	100291052	100291552	*	5.11	6.09	-0.29	6.39	1.34e-09	1.1e-07
chr11	70390455	70390955	*	5.32	6.27	1.32	4.95	1.34e-09	1.1e-07
chr17	43095839	43096339	*	7.48	8.37	4.71	3.66	1.35e-09	1.11e-07
chr1	16064070	16064570	*	4.99	5.97	-0.29	6.27	1.35e-09	1.11e-07
chr11	65343440	65343940	*	4.99	5.97	-0.29	6.26	1.36e-09	1.11e-07
chr19	42830073	42830573	*	5.23	6.19	0.84	5.35	1.37e-09	1.12e-07
chr5	179125800	179126300	*	5.69	6.65	1.7	4.95	1.41e-09	1.15e-07
chr4	3504390	3504890	*	7.48	8.34	5.02	3.33	1.44e-09	1.17e-07
chr17	80548662	80549162	*	6.36	7.27	3.2	4.08	1.49e-09	1.21e-07
chr14	101696716	101697216	*	5.52	6.45	2.01	4.45	1.57e-09	1.27e-07
chr22	50726156	50726656	*	5.17	6.15	-0.29	6.44	1.61e-09	1.3e-07
chr4	2073441	2073941	*	6.38	7.25	3.85	3.4	1.62e-09	1.3e-07
chr17	73842023	73842523	*	5.08	6.04	0.84	5.2	1.64e-09	1.31e-07
chr17	42843841	42844341	*	5.31	6.27	1.31	4.95	1.66e-09	1.32e-07
chr3	48611947	48612447	*	5.75	6.67	2.67	4	1.68e-09	1.34e-07
chr14	104009700	104010200	*	6.1	7.04	2.6	4.44	1.71e-09	1.36e-07
chr1	2454093	2454593	*	5.03	5.98	1.18	4.8	1.74e-09	1.38e-07
chr16	85490688	85491188	*	6.16	7.07	3.16	3.91	1.79e-09	1.41e-07
chr16	617049	617549	*	5.58	6.51	2.11	4.4	1.8e-09	1.42e-07
chr17	73839872	73840372	*	5.72	6.67	1.99	4.68	1.86e-09	1.47e-07
chr10	120924775	120925275	*	6.98	7.86	4.34	3.52	1.88e-09	1.47e-07
chr20	31897350	31897850	*	5.04	6	0.84	5.16	1.9e-09	1.48e-07
chr2	240076625	240077125	*	8.16	9.02	5.69	3.33	1.9e-09	1.48e-07
chr9	129460599	129461099	*	5.39	6.34	1.31	5.03	1.93e-09	1.51e-07
chr22	22336271	22336771	*	5.09	6.06	0.2	5.86	1.94e-09	1.51e-07
chr22	45341502	45342002	*	5.97	6.87	3.14	3.72	1.97e-09	1.53e-07
chr18	14334458	14334958	*	6.4	7.28	3.76	3.52	2.01e-09	1.55e-07
chr20	49330792	49331292	*	5.27	6.23	1.33	4.9	2.02e-09	1.55e-07
chr15	66937234	66937734	*	5.37	6.36	-0.29	6.65	2.02e-09	1.55e-07
chr19	1028709	1029209	*	5.17	6.11	1.53	4.59	2.02e-09	1.55e-07
chr1	55045732	55046232	*	5.05	6.02	0.38	5.64	2.05e-09	1.57e-07
chr9	136856943	136857443	*	5.73	6.64	2.67	3.96	2.11e-09	1.6e-07
chr5	178420803	178421303	*	5.22	6.21	-0.29	6.5	2.11e-09	1.6e-07
chr16	84816121	84816621	*	5.17	6.14	0.86	5.27	2.11e-09	1.6e-07
chr1	228396914	228397414	*	4.94	5.92	0.08	5.84	2.12e-09	1.61e-07
chr20	43340284	43340784	*	5.63	6.58	1.79	4.79	2.13e-09	1.61e-07
chr2	241325147	241325647	*	5.7	6.64	1.94	4.7	2.15e-09	1.62e-07
chrX	153563233	153563733	*	4.9	5.89	-0.29	6.18	2.23e-09	1.68e-07
chr7	151091195	151091695	*	4.79	5.75	0.48	5.27	2.26e-09	1.69e-07
chr19	39219412	39219912	*	7.21	8.12	4.27	3.85	2.27e-09	1.7e-07
chr18	2906657	2907157	*	7.18	8.12	3.48	4.64	2.31e-09	1.72e-07
chr16	85525186	85525686	*	6.53	7.43	3.62	3.81	2.32e-09	1.72e-07
chr11	128750800	128751300	*	5.26	6.25	-0.29	6.54	2.37e-09	1.76e-07
chr10	73380212	73380712	*	6.59	7.53	3.07	4.46	2.37e-09	1.76e-07
chr20	61647488	61647988	*	5.25	6.2	1.32	4.88	2.39e-09	1.77e-07
chr4	8590890	8591390	*	5.46	6.39	1.86	4.53	2.4e-09	1.77e-07
chr1	51795933	51796433	*	6.9	7.79	4.13	3.66	2.46e-09	1.81e-07
chr22	50690298	50690798	*	5.5	6.45	1.58	4.88	2.46e-09	1.81e-07
chr19	14076545	14077045	*	6.26	7.17	3.17	4	2.48e-09	1.82e-07
chr6	43459784	43460284	*	6.08	6.98	3.14	3.85	2.51e-09	1.83e-07
chr8	143377933	143378433	*	6.14	7.09	2.5	4.58	2.51e-09	1.83e-07
chr19	2060984	2061484	*	6.2	7.1	3.27	3.83	2.54e-09	1.85e-07
chr20	25228131	25228631	*	6.26	7.17	3.25	3.92	2.56e-09	1.86e-07
chr16	89119516	89120016	*	5.18	6.12	1.57	4.55	2.57e-09	1.86e-07
chr16	2391329	2391829	*	8.99	9.86	6.42	3.43	2.57e-09	1.86e-07
chr14	104899601	104900101	*	4.81	5.77	0.62	5.15	2.58e-09	1.86e-07
chr20	62070206	62070706	*	5.94	6.86	2.67	4.18	2.61e-09	1.88e-07
chr19	18577973	18578473	*	5.54	6.48	1.9	4.58	2.64e-09	1.89e-07
chr12	3443626	3444126	*	6.78	7.69	3.69	4	2.68e-09	1.91e-07
chr15	40600192	40600692	*	4.87	5.85	-0.29	6.14	2.68e-09	1.91e-07
chr19	49640958	49641458	*	4.88	5.85	0.2	5.65	2.68e-09	1.91e-07
chr11	6624500	6625000	*	6.59	7.5	3.65	3.85	2.7e-09	1.91e-07
chr1	17599365	17599865	*	4.98	5.96	0.2	5.75	2.81e-09	1.99e-07
chr20	30469715	30470215	*	5.17	6.15	-0.29	6.45	2.81e-09	1.99e-07
chr6	168135663	168136163	*	8.13	9	5.59	3.42	2.82e-09	1.99e-07
chr19	49971901	49972401	*	5.04	6.02	0.08	5.93	2.86e-09	2.01e-07
chr8	143707649	143708149	*	6.39	7.32	2.96	4.36	2.97e-09	2.08e-07
chr15	69590243	69590743	*	5.31	6.26	1.49	4.76	3.03e-09	2.11e-07
chr12	12014340	12014840	*	4.95	5.92	0.08	5.84	3.03e-09	2.11e-07
chr11	2144146	2144646	*	6.17	7.1	2.73	4.37	3.04e-09	2.11e-07
chr19	42794023	42794523	*	5.48	6.42	1.61	4.81	3.09e-09	2.15e-07
chr17	47999553	48000053	*	5.67	6.61	2.16	4.45	3.14e-09	2.17e-07
chr16	89939214	89939714	*	4.96	5.92	0.62	5.3	3.15e-09	2.17e-07
chr1	22889898	22890398	*	4.92	5.89	0.38	5.51	3.16e-09	2.17e-07
chr17	71574570	71575070	*	4.83	5.81	-0.29	6.1	3.16e-09	2.17e-07
chr16	2208234	2208734	*	5.36	6.29	2.13	4.15	3.17e-09	2.17e-07
chr11	61244858	61245358	*	5.13	6.08	1.18	4.91	3.21e-09	2.2e-07
chr1	26348510	26349010	*	4.88	5.85	0.08	5.77	3.27e-09	2.24e-07
chr7	157572190	157572690	*	4.88	5.84	0.57	5.27	3.3e-09	2.25e-07
chr7	55878221	55878721	*	5.52	6.44	2.37	4.07	3.34e-09	2.27e-07
chr10	43601242	43601742	*	5.25	6.2	1.52	4.68	3.35e-09	2.27e-07
chr19	3176903	3177403	*	4.82	5.8	-0.29	6.09	3.36e-09	2.27e-07
chr16	87885545	87886045	*	6.06	6.97	3.07	3.9	3.37e-09	2.28e-07
chr1	41837724	41838224	*	6.54	7.46	3.38	4.08	3.38e-09	2.28e-07
chr7	2508372	2508872	*	6.88	7.75	4.37	3.37	3.4e-09	2.29e-07
chr19	1155172	1155672	*	5.3	6.26	1.32	4.94	3.44e-09	2.31e-07
chr12	131500943	131501443	*	6.22	7.16	2.67	4.48	3.48e-09	2.33e-07
chr19	1063726	1064226	*	4.84	5.79	0.84	4.96	3.48e-09	2.33e-07
chr17	75062319	75062819	*	4.91	5.89	-0.29	6.18	3.54e-09	2.36e-07
chr19	10532467	10532967	*	6.25	7.17	3	4.17	3.56e-09	2.37e-07
chr19	1098040	1098540	*	5.32	6.26	1.69	4.56	3.58e-09	2.38e-07
chr3	48690457	48690957	*	5.76	6.7	2.26	4.44	3.62e-09	2.4e-07
chr17	29848334	29848834	*	6.62	7.54	3.47	4.07	3.72e-09	2.46e-07
chr17	80170895	80171395	*	5.54	6.46	2.39	4.07	3.74e-09	2.46e-07
chr17	48241620	48242120	*	6.25	7.13	3.53	3.61	3.84e-09	2.53e-07
chr9	140075744	140076244	*	5.62	6.5	2.87	3.63	3.86e-09	2.54e-07
chr2	42795717	42796217	*	5.87	6.8	2.55	4.25	3.88e-09	2.54e-07
chr20	61942796	61943296	*	7.44	8.32	4.77	3.55	3.89e-09	2.54e-07
chr12	1999647	2000147	*	6.47	7.35	3.91	3.44	3.94e-09	2.57e-07
chr19	39888032	39888532	*	4.77	5.74	0.48	5.26	4e-09	2.61e-07
chr3	127262868	127263368	*	7.01	7.9	4.3	3.59	4.02e-09	2.61e-07
chr1	44483780	44484280	*	5.46	6.37	2.43	3.94	4.08e-09	2.64e-07
chr2	233320191	233320691	*	5.13	6.07	1.57	4.5	4.08e-09	2.64e-07
chr7	158209978	158210478	*	4.85	5.8	0.9	4.9	4.11e-09	2.65e-07
chr8	63161591	63162091	*	6.48	7.38	3.49	3.89	4.11e-09	2.65e-07
chr14	105395253	105395753	*	5.97	6.85	3.23	3.62	4.13e-09	2.65e-07
chr8	145655241	145655741	*	7.95	8.81	5.52	3.29	4.2e-09	2.7e-07
chr13	19755559	19756059	*	4.74	5.71	0.2	5.51	4.26e-09	2.73e-07
chr15	45460435	45460935	*	5.39	6.32	2.04	4.28	4.28e-09	2.73e-07
chr3	52418429	52418929	*	7	7.88	4.33	3.55	4.31e-09	2.75e-07
chr14	105899498	105899998	*	5.55	6.49	1.86	4.63	4.32e-09	2.75e-07
chr16	88620800	88621300	*	4.76	5.74	-0.29	6.03	4.4e-09	2.79e-07
chr12	124845848	124846348	*	5.6	6.52	2.46	4.06	4.46e-09	2.83e-07
chr19	59097723	59098223	*	5.59	6.49	2.69	3.8	4.47e-09	2.83e-07
chr16	1728186	1728686	*	4.98	5.92	1.2	4.72	4.54e-09	2.87e-07
chr7	5620262	5620762	*	5.28	6.26	0.2	6.06	4.58e-09	2.89e-07
chr11	67399913	67400413	*	5.83	6.77	2.23	4.54	4.66e-09	2.93e-07
chr19	17359106	17359606	*	6.33	7.24	3.13	4.12	4.8e-09	3.01e-07
chr2	134877602	134878102	*	6.23	7.11	3.59	3.52	4.84e-09	3.03e-07
chr1	19970224	19970724	*	4.81	5.76	0.97	4.79	4.87e-09	3.04e-07
chr1	917052	917552	*	7.63	8.48	5.23	3.25	4.87e-09	3.04e-07
chr1	199934194	199934694	*	4.81	5.79	-0.29	6.08	4.9e-09	3.04e-07
chr20	61938651	61939151	*	5.16	6.11	1.1	5.01	4.97e-09	3.08e-07
chr10	43428345	43428845	*	4.97	5.94	0.08	5.86	5.07e-09	3.14e-07
chr8	144297062	144297562	*	6.38	7.32	2.91	4.41	5.1e-09	3.15e-07
chr1	204446299	204446799	*	5.65	6.56	2.62	3.94	5.19e-09	3.2e-07
chr20	2774641	2775141	*	5.88	6.82	2.41	4.41	5.2e-09	3.2e-07
chr12	4140711	4141211	*	8.06	8.94	5.38	3.56	5.28e-09	3.24e-07
chr1	11765331	11765831	*	5.2	6.15	1.18	4.98	5.43e-09	3.32e-07
chr1	1468406	1468906	*	5.31	6.25	1.69	4.56	5.43e-09	3.32e-07
chr1	45156432	45156932	*	4.81	5.79	-0.29	6.08	5.44e-09	3.32e-07
chr15	91519285	91519785	*	4.94	5.89	1.14	4.75	5.45e-09	3.32e-07
chr20	3682353	3682853	*	5.35	6.31	1.09	5.22	5.46e-09	3.32e-07
chr17	73887795	73888295	*	5.36	6.3	1.59	4.72	5.5e-09	3.34e-07
chr6	31239488	31239988	*	6.23	7.17	2.82	4.34	5.51e-09	3.34e-07
chr8	131028814	131029314	*	6.07	6.97	3.16	3.81	5.55e-09	3.35e-07
chr2	47256820	47257320	*	4.96	5.9	1.34	4.56	5.56e-09	3.35e-07
chr4	3486576	3487076	*	6.41	7.3	3.72	3.58	5.63e-09	3.37e-07
chr17	48922964	48923464	*	6.86	7.74	4.27	3.47	5.64e-09	3.37e-07
chr17	41753918	41754418	*	5.88	6.8	2.7	4.1	5.64e-09	3.37e-07
chr16	608431	608931	*	5.47	6.4	1.99	4.42	5.64e-09	3.37e-07
chr1	202611022	202611522	*	4.81	5.78	0.08	5.69	5.66e-09	3.38e-07
chr1	110752172	110752672	*	6.56	7.47	3.65	3.81	5.7e-09	3.4e-07
chr16	2083090	2083590	*	6.24	7.16	2.96	4.21	5.74e-09	3.41e-07
chr14	74485517	74486017	*	5.76	6.71	1.89	4.82	5.85e-09	3.47e-07
chr17	1507492	1507992	*	5.25	6.21	1.18	5.03	5.88e-09	3.49e-07
chr17	17584759	17585259	*	8.41	9.27	6.01	3.26	5.91e-09	3.49e-07
chr1	32149569	32150069	*	8.09	8.98	5.24	3.74	5.93e-09	3.5e-07
chr19	19005691	19006191	*	8.35	9.2	6.03	3.17	5.96e-09	3.5e-07
chr16	2889977	2890477	*	5.22	6.16	1.46	4.7	5.96e-09	3.5e-07
chr15	63101424	63101924	*	6.05	6.99	2.5	4.49	6.18e-09	3.62e-07
chr8	145647610	145648110	*	6.14	7.07	2.68	4.39	6.19e-09	3.62e-07
chr16	11680372	11680872	*	4.96	5.92	0.62	5.3	6.23e-09	3.64e-07
chr17	48877259	48877759	*	4.84	5.82	-0.29	6.11	6.28e-09	3.66e-07
chr19	5805228	5805728	*	6.56	7.43	3.94	3.49	6.38e-09	3.72e-07
chr19	4120819	4121319	*	5.07	6	1.6	4.4	6.4e-09	3.72e-07
chr17	73234114	73234614	*	6.64	7.52	3.91	3.61	6.57e-09	3.81e-07
chr5	6508008	6508508	*	7.38	8.26	4.73	3.53	6.62e-09	3.83e-07
chr1	44481871	44482371	*	5.1	6.05	1.18	4.88	6.74e-09	3.89e-07
chr14	30397127	30397627	*	6.19	7.12	2.74	4.38	6.88e-09	3.96e-07
chr1	155149608	155150108	*	4.77	5.74	0.08	5.66	6.88e-09	3.96e-07
chr11	68704186	68704686	*	6.34	7.25	3.41	3.84	6.89e-09	3.96e-07
chr1	113498257	113498757	*	5.66	6.59	2.07	4.53	6.92e-09	3.97e-07
chr4	56212455	56212955	*	8.46	9.33	5.94	3.39	6.95e-09	3.98e-07
chr16	67707129	67707629	*	6.6	7.47	4	3.47	7.01e-09	4e-07
chr18	77153626	77154126	*	7.6	8.46	5.15	3.32	7.11e-09	4.05e-07
chr19	18557785	18558285	*	7.25	8.13	4.56	3.57	7.13e-09	4.06e-07
chr7	1399672	1400172	*	6.31	7.2	3.58	3.62	7.15e-09	4.06e-07
chr22	46504730	46505230	*	6.92	7.81	4.18	3.63	7.25e-09	4.11e-07
chr8	144342585	144343085	*	8.51	9.4	5.78	3.62	7.32e-09	4.14e-07
chr14	105804745	105805245	*	7.11	7.98	4.57	3.41	7.36e-09	4.16e-07
chr3	75718796	75719296	*	5.66	6.6	1.98	4.62	7.42e-09	4.19e-07
chr20	25031504	25032004	*	5.14	6.1	1.18	4.92	7.7e-09	4.33e-07
chr9	138589075	138589575	*	4.79	5.77	-0.29	6.06	7.73e-09	4.33e-07
chr1	181025610	181026110	*	5.74	6.63	2.97	3.66	7.73e-09	4.33e-07
chr22	50193298	50193798	*	5.79	6.69	2.91	3.78	7.74e-09	4.33e-07
chr16	70717276	70717776	*	6.63	7.5	4.09	3.41	7.78e-09	4.34e-07
chr17	1365399	1365899	*	5.14	6.07	1.75	4.32	7.96e-09	4.44e-07
chr14	105271395	105271895	*	4.83	5.81	-0.29	6.1	8.11e-09	4.5e-07
chr19	55811403	55811903	*	4.68	5.64	0.38	5.26	8.12e-09	4.5e-07
chr11	65780104	65780604	*	5.02	6	-0.29	6.29	8.12e-09	4.5e-07
chr1	206680923	206681423	*	5.73	6.66	2.48	4.17	8.17e-09	4.52e-07
chr11	65319064	65319564	*	7.76	8.65	5.03	3.62	8.2e-09	4.53e-07
chr2	91961058	91961558	*	4.97	5.95	0.08	5.86	8.23e-09	4.54e-07
chr14	69026054	69026554	*	5.67	6.57	2.67	3.91	8.28e-09	4.55e-07
chr22	31042242	31042742	*	4.87	5.85	-0.29	6.14	8.32e-09	4.57e-07
chr15	91434746	91435246	*	4.99	5.94	1.02	4.92	8.42e-09	4.61e-07
chr12	125478356	125478856	*	8.59	9.45	6.11	3.34	8.43e-09	4.62e-07
chr3	126727541	126728041	*	4.68	5.66	-0.29	5.95	8.46e-09	4.62e-07
chr19	45769627	45770127	*	4.88	5.83	0.83	5	8.48e-09	4.63e-07
chr3	50610435	50610935	*	4.85	5.83	-0.29	6.12	8.5e-09	4.63e-07
chr2	112464172	112464672	*	6.82	7.66	4.53	3.13	8.54e-09	4.64e-07
chr16	81322332	81322832	*	5.07	6.04	0.83	5.21	8.55e-09	4.64e-07
chr5	177962652	177963152	*	4.68	5.66	-0.29	5.95	8.57e-09	4.64e-07
chr6	143857984	143858484	*	6.22	7.1	3.52	3.59	8.58e-09	4.64e-07
chr12	54595344	54595844	*	4.99	5.97	-0.29	6.26	8.65e-09	4.67e-07
chr7	66133814	66134314	*	5.37	6.3	2.05	4.25	8.79e-09	4.73e-07
chr11	65787942	65788442	*	5.52	6.43	2.44	3.99	8.95e-09	4.81e-07
chr8	143554028	143554528	*	6.26	7.16	3.38	3.78	8.99e-09	4.82e-07
chr19	19173936	19174436	*	5.57	6.5	2.05	4.46	9.24e-09	4.95e-07
chr17	46958237	46958737	*	5.75	6.66	2.59	4.08	9.26e-09	4.95e-07
chr17	79151879	79152379	*	7.87	8.74	5.31	3.43	9.48e-09	5.06e-07
chr11	49913786	49914286	*	4.82	5.8	-0.29	6.09	9.54e-09	5.08e-07
chr1	19395046	19395546	*	5.28	6.22	1.7	4.52	9.63e-09	5.12e-07
chr9	132043788	132044288	*	5.57	6.46	2.75	3.71	9.64e-09	5.12e-07
chrX	149010156	149010656	*	5.38	6.3	2.12	4.18	9.68e-09	5.13e-07
chr2	10206202	10206702	*	6.75	7.61	4.3	3.31	9.8e-09	5.17e-07
chr8	143611506	143612006	*	5.21	6.13	1.89	4.24	9.8e-09	5.17e-07
chr14	69726877	69727377	*	7.13	8	4.61	3.39	9.83e-09	5.17e-07
chr4	3937922	3938422	*	4.82	5.8	-0.29	6.09	9.83e-09	5.17e-07
chr16	87874822	87875322	*	6.42	7.3	3.79	3.5	9.89e-09	5.19e-07
chr12	123636320	123636820	*	6.12	7	3.42	3.58	9.91e-09	5.19e-07
chr9	129423257	129423757	*	5.68	6.63	1.79	4.84	9.92e-09	5.19e-07
chr3	126984151	126984651	*	5.87	6.76	3.16	3.6	9.99e-09	5.22e-07
chr17	43870499	43870999	*	4.86	5.82	0.86	4.95	1.01e-08	5.28e-07
chr12	133043245	133043745	*	7.08	7.94	4.63	3.3	1.02e-08	5.29e-07
chr3	52280185	52280685	*	6.33	7.23	3.49	3.74	1.02e-08	5.32e-07
chr20	61907167	61907667	*	6.46	7.34	3.77	3.58	1.03e-08	5.37e-07
chr19	35222146	35222646	*	5.23	6.16	1.92	4.24	1.04e-08	5.38e-07
chr18	12272295	12272795	*	4.93	5.91	-0.29	6.21	1.04e-08	5.38e-07
chr9	139607346	139607846	*	4.97	5.93	0.79	5.15	1.05e-08	5.4e-07
chr11	63975574	63976074	*	8.02	8.87	5.62	3.25	1.05e-08	5.4e-07
chr11	75871548	75872048	*	5.6	6.51	2.49	4.02	1.08e-08	5.55e-07
chr2	233306632	233307132	*	4.98	5.97	-0.29	6.26	1.11e-08	5.7e-07
chr15	78181709	78182209	*	5.93	6.82	3.1	3.72	1.11e-08	5.7e-07
chr19	47479621	47480121	*	4.8	5.78	-0.29	6.08	1.12e-08	5.75e-07
chr11	119218259	119218759	*	5.97	6.85	3.4	3.45	1.13e-08	5.75e-07
chr15	22892167	22892667	*	5.3	6.25	1.45	4.8	1.13e-08	5.77e-07
chr22	25800713	25801213	*	6.94	7.82	4.27	3.55	1.14e-08	5.8e-07
chr7	101821135	101821635	*	4.62	5.59	0.08	5.5	1.15e-08	5.84e-07
chr7	100609478	100609978	*	4.97	5.95	-0.29	6.24	1.16e-08	5.87e-07
chr9	136027375	136027875	*	4.71	5.68	0.2	5.47	1.19e-08	6.01e-07
chr17	30592434	30592934	*	7.35	8.2	4.95	3.25	1.19e-08	6.01e-07
chr5	131725523	131726023	*	5.88	6.79	2.94	3.85	1.21e-08	6.08e-07
chr11	47371289	47371789	*	6.51	7.4	3.65	3.75	1.21e-08	6.08e-07
chr3	47466888	47467388	*	4.69	5.67	-0.29	5.96	1.21e-08	6.08e-07
chr17	37773205	37773705	*	5.35	6.26	2.35	3.91	1.22e-08	6.12e-07
chr16	58003544	58004044	*	4.75	5.7	0.62	5.08	1.22e-08	6.12e-07
chr11	47373378	47373878	*	5.83	6.76	2.36	4.4	1.22e-08	6.12e-07
chr22	48948859	48949359	*	4.77	5.71	1.18	4.53	1.23e-08	6.15e-07
chr15	69586078	69586578	*	4.93	5.88	1.1	4.77	1.25e-08	6.25e-07
chr3	186317214	186317714	*	5.56	6.51	1.8	4.7	1.25e-08	6.25e-07
chr1	3274344	3274844	*	6.74	7.61	4.14	3.47	1.26e-08	6.25e-07
chr13	114214568	114215068	*	5.2	6.14	1.45	4.69	1.27e-08	6.3e-07
chr11	60609878	60610378	*	5.19	6.17	0.08	6.08	1.28e-08	6.35e-07
chr4	139936986	139937486	*	5.35	6.27	2.18	4.09	1.3e-08	6.43e-07
chr14	65427717	65428217	*	5.92	6.85	2.62	4.23	1.31e-08	6.46e-07
chr16	715964	716464	*	5.79	6.71	2.45	4.26	1.32e-08	6.5e-07
chr7	102067200	102067700	*	6.41	7.3	3.7	3.6	1.32e-08	6.51e-07
chr13	113688754	113689254	*	5.72	6.62	2.81	3.81	1.32e-08	6.51e-07
chr2	120301954	120302454	*	7.59	8.48	4.84	3.65	1.33e-08	6.51e-07
chr10	134021348	134021848	*	5.25	6.19	1.61	4.58	1.33e-08	6.51e-07
chr12	12414798	12415298	*	4.6	5.56	0.38	5.18	1.33e-08	6.51e-07
chr19	19646024	19646524	*	6.52	7.39	4.03	3.37	1.34e-08	6.53e-07
chr17	32906987	32907487	*	4.77	5.74	0.38	5.36	1.37e-08	6.67e-07
chr19	51265206	51265706	*	5.79	6.72	2.36	4.37	1.39e-08	6.78e-07
chr22	49556371	49556871	*	7.55	8.41	5.09	3.32	1.4e-08	6.79e-07
chr19	33891782	33892282	*	5.17	6.1	1.74	4.36	1.4e-08	6.79e-07
chr16	81812835	81813335	*	5.24	6.18	1.72	4.45	1.4e-08	6.79e-07
chr19	59037147	59037647	*	5.99	6.89	3.04	3.85	1.41e-08	6.82e-07
chr22	24108957	24109457	*	5.22	6.15	1.68	4.47	1.41e-08	6.82e-07
chr15	68122182	68122682	*	5.8	6.7	2.83	3.88	1.42e-08	6.87e-07
chr17	1540070	1540570	*	4.75	5.73	-0.29	6.02	1.45e-08	6.99e-07
chr1	27030519	27031019	*	5.29	6.22	1.95	4.28	1.46e-08	7.04e-07
chr1	17278426	17278926	*	6.86	7.79	3.47	4.32	1.49e-08	7.13e-07
chr19	1020466	1020966	*	4.82	5.8	-0.29	6.09	1.49e-08	7.13e-07
chr2	233303851	233304351	*	8.41	9.27	5.95	3.32	1.49e-08	7.15e-07
chr8	144417128	144417628	*	8.14	9	5.68	3.32	1.51e-08	7.21e-07
chr16	69599971	69600934	*	5.53	6.44	2.5	3.94	1.51e-08	7.22e-07
chr13	99738756	99739256	*	4.84	5.81	0.08	5.72	1.53e-08	7.29e-07
chr8	145643170	145643670	*	5.73	6.62	2.94	3.67	1.55e-08	7.37e-07
chr8	144309591	144310091	*	6.39	7.27	3.69	3.58	1.57e-08	7.45e-07
chr16	4523551	4524051	*	5.18	6.13	1.45	4.67	1.57e-08	7.45e-07
chr21	45558520	45559020	*	4.72	5.69	-0.29	5.98	1.57e-08	7.45e-07
chr3	52033012	52033512	*	5.25	6.19	1.49	4.7	1.58e-08	7.45e-07
chr10	135015256	135015756	*	5.15	6.08	1.72	4.36	1.61e-08	7.61e-07
chr10	134681351	134681851	*	5.31	6.23	2.05	4.18	1.64e-08	7.7e-07
chr20	61013092	61013592	*	4.82	5.78	0.38	5.41	1.65e-08	7.74e-07
chr17	62044497	62044997	*	4.58	5.56	-0.29	5.85	1.66e-08	7.78e-07
chr19	2255686	2256186	*	7.26	8.14	4.62	3.53	1.67e-08	7.82e-07
chr4	6260672	6261172	*	5.3	6.23	2.01	4.22	1.67e-08	7.82e-07
chr9	139392877	139393377	*	4.71	5.66	0.84	4.83	1.67e-08	7.82e-07
chr22	37396683	37397183	*	5.07	6	1.59	4.42	1.68e-08	7.84e-07
chr22	50351213	50351713	*	6.11	6.99	3.38	3.61	1.69e-08	7.88e-07
chr1	985664	986164	*	5.38	6.3	2.23	4.07	1.7e-08	7.89e-07
chr8	143332952	143333452	*	7.1	7.96	4.69	3.26	1.7e-08	7.89e-07
chr9	130319925	130320425	*	5.64	6.56	2.41	4.15	1.7e-08	7.89e-07
chr5	175961248	175961748	*	4.87	5.83	0.63	5.2	1.7e-08	7.89e-07
chr11	64121145	64121645	*	7.57	8.49	4.51	3.97	1.71e-08	7.92e-07
chr16	1827778	1828278	*	5.15	6.12	0.83	5.29	1.72e-08	7.92e-07
chr1	2852332	2852832	*	5.29	6.23	1.58	4.65	1.72e-08	7.94e-07
chr11	119724439	119724939	*	5.17	6.1	1.82	4.28	1.74e-08	8e-07
chr12	57915862	57916362	*	5.81	6.73	2.58	4.15	1.74e-08	8e-07
chr11	66116406	66116906	*	4.63	5.61	-0.29	5.9	1.75e-08	8e-07
chr16	3541217	3541717	*	4.68	5.66	-0.29	5.95	1.75e-08	8e-07
chr7	101957631	101958131	*	7.5	8.38	4.89	3.49	1.75e-08	8e-07
chr5	79703793	79704293	*	4.84	5.82	-0.29	6.11	1.75e-08	8.02e-07
chr5	542440	542940	*	6.63	7.54	3.69	3.84	1.78e-08	8.11e-07
chr11	68777785	68778285	*	5.65	6.57	2.36	4.21	1.79e-08	8.13e-07
chr14	105182333	105182833	*	4.76	5.74	-0.29	6.03	1.8e-08	8.16e-07
chr16	2054377	2054877	*	4.59	5.57	-0.29	5.86	1.8e-08	8.17e-07
chr17	79457613	79458113	*	5.56	6.47	2.5	3.97	1.81e-08	8.19e-07
chr8	38307844	38308344	*	4.7	5.65	0.71	4.95	1.82e-08	8.22e-07
chr11	67044532	67045032	*	6.4	7.28	3.75	3.53	1.83e-08	8.29e-07
chr7	98970215	98970715	*	6.68	7.55	4.14	3.41	1.89e-08	8.52e-07
chr19	18894695	18895195	*	4.83	5.78	0.84	4.94	1.9e-08	8.59e-07
chr20	2741312	2741812	*	5.67	6.57	2.77	3.79	1.91e-08	8.62e-07
chr9	139877811	139878311	*	7.62	8.48	5.25	3.23	1.93e-08	8.69e-07
chr10	81196321	81196821	*	7	7.86	4.59	3.28	1.95e-08	8.74e-07
chr20	61695529	61696029	*	6.34	7.22	3.73	3.48	1.95e-08	8.75e-07
chr22	40043165	40043665	*	4.88	5.82	1.33	4.49	1.96e-08	8.79e-07
chr19	3725214	3725714	*	5.06	6	1.49	4.51	1.97e-08	8.81e-07
chr19	12975898	12976398	*	4.63	5.61	-0.29	5.9	2.01e-08	8.98e-07
chr16	11706162	11706662	*	4.95	5.9	1.1	4.79	2.02e-08	9.02e-07
chr22	21310875	21311375	*	5.05	6	1.23	4.76	2.04e-08	9.06e-07
chr22	43517993	43518493	*	4.82	5.76	1.18	4.58	2.05e-08	9.09e-07
chr11	47381568	47382068	*	4.59	5.55	0.38	5.17	2.05e-08	9.11e-07
chr8	144700097	144700597	*	5.78	6.67	3.01	3.66	2.06e-08	9.11e-07
chr11	68540856	68541356	*	5.23	6.14	2.03	4.12	2.06e-08	9.13e-07
chr22	38132848	38133348	*	7.06	7.92	4.66	3.25	2.08e-08	9.15e-07
chr11	67059532	67060032	*	5.97	6.85	3.34	3.51	2.08e-08	9.15e-07
chr15	76010425	76010925	*	4.68	5.66	-0.29	5.95	2.08e-08	9.15e-07
chr2	241733238	241733738	*	5.49	6.4	2.41	3.98	2.08e-08	9.15e-07
chr22	37852247	37852747	*	5.37	6.29	2.12	4.17	2.08e-08	9.15e-07
chr19	54808503	54809003	*	6.47	7.32	4.16	3.16	2.1e-08	9.21e-07
chr16	3063164	3063664	*	7.21	8.07	4.76	3.3	2.13e-08	9.31e-07
chr20	58141614	58142114	*	4.94	5.88	1.18	4.7	2.14e-08	9.33e-07
chr5	1109426	1109926	*	4.56	5.54	-0.29	5.83	2.15e-08	9.36e-07
chr5	546363	546863	*	6.58	7.44	4.09	3.35	2.15e-08	9.36e-07
chr1	156039888	156040388	*	5.43	6.34	2.3	4.04	2.17e-08	9.42e-07
chr9	138818847	138819347	*	4.6	5.58	-0.29	5.87	2.17e-08	9.45e-07
chr11	553298	553798	*	5.22	6.15	1.78	4.37	2.18e-08	9.45e-07
chr9	139886290	139886790	*	4.55	5.53	-0.29	5.82	2.18e-08	9.45e-07
chr8	69244325	69244825	*	4.96	5.92	0.86	5.06	2.19e-08	9.45e-07
chr17	73556013	73556513	*	6.73	7.64	3.79	3.85	2.19e-08	9.45e-07
chr19	7916759	7917259	*	4.65	5.6	0.62	4.98	2.19e-08	9.45e-07
chr1	155294386	155294886	*	6.16	7.05	3.38	3.67	2.2e-08	9.47e-07
chr15	74626727	74627227	*	4.66	5.61	0.63	4.98	2.24e-08	9.65e-07
chr1	16515857	16516357	*	5.14	6.1	1.1	4.99	2.25e-08	9.65e-07
chr12	122278207	122278707	*	4.81	5.76	0.91	4.85	2.25e-08	9.65e-07
chr17	72459122	72459622	*	5.59	6.53	1.89	4.64	2.25e-08	9.65e-07
chr2	128477202	128477702	*	4.9	5.84	1.18	4.66	2.27e-08	9.71e-07
chr16	88575074	88575574	*	4.76	5.71	0.97	4.74	2.27e-08	9.71e-07
chr9	137234334	137234834	*	5.46	6.39	2.18	4.21	2.28e-08	9.71e-07
chr2	241108931	241109431	*	6.4	7.26	4.05	3.21	2.31e-08	9.82e-07
chr20	60461594	60462094	*	5.77	6.66	3.04	3.61	2.31e-08	9.82e-07
chr15	40763294	40763794	*	6.09	6.99	3.27	3.72	2.31e-08	9.82e-07
chr11	76902962	76903462	*	6.27	7.15	3.55	3.61	2.32e-08	9.86e-07
chr1	111742513	111743013	*	5.04	5.98	1.3	4.69	2.33e-08	9.87e-07
chr8	28292282	28292782	*	6.04	6.96	2.97	3.99	2.33e-08	9.87e-07
chr20	61449971	61450471	*	5.14	6.09	1.31	4.78	2.36e-08	9.95e-07
chr22	43511744	43512244	*	4.96	5.92	0.86	5.06	2.37e-08	9.99e-07
chr9	136836198	136836698	*	4.72	5.67	0.63	5.04	2.37e-08	1e-06
chr19	13256441	13256941	*	5.14	6.06	1.93	4.12	2.38e-08	1e-06
chr19	1665719	1666219	*	6.05	6.92	3.51	3.42	2.39e-08	1e-06
chr2	133014595	133015095	*	6.26	7.14	3.69	3.45	2.41e-08	1.01e-06
chr1	2795375	2795875	*	4.92	5.88	0.83	5.05	2.41e-08	1.01e-06
chr1	18990557	18991057	*	4.92	5.86	1.19	4.68	2.42e-08	1.01e-06
chr11	64878129	64878629	*	7.41	8.28	4.8	3.49	2.42e-08	1.01e-06
chr1	21037228	21037728	*	6.6	7.45	4.32	3.13	2.43e-08	1.01e-06
chr19	15490769	15491269	*	4.77	5.74	-0.29	6.04	2.43e-08	1.01e-06
chr14	103541157	103541657	*	5.58	6.46	2.97	3.49	2.44e-08	1.02e-06
chr17	42065595	42066095	*	4.6	5.57	-0.29	5.86	2.45e-08	1.02e-06
chr8	142219185	142219685	*	7.05	7.92	4.51	3.4	2.46e-08	1.02e-06
chr9	137144883	137145383	*	5.51	6.43	2.42	4	2.49e-08	1.03e-06
chr19	39694649	39695149	*	4.51	5.48	0.08	5.4	2.58e-08	1.07e-06
chr19	42512224	42512724	*	4.77	5.73	0.84	4.89	2.6e-08	1.07e-06
chr11	70509633	70510133	*	5.09	6.04	1.42	4.61	2.6e-08	1.07e-06
chr4	39529359	39529859	*	6.57	7.47	3.57	3.9	2.63e-08	1.08e-06
chr7	99705704	99706204	*	5.22	6.16	1.62	4.54	2.64e-08	1.08e-06
chr10	124395840	124396340	*	5.54	6.46	2.27	4.19	2.64e-08	1.08e-06
chr7	2563258	2563758	*	6.97	7.86	4.23	3.63	2.65e-08	1.09e-06
chr14	104682277	104682777	*	4.91	5.87	1.01	4.85	2.68e-08	1.1e-06
chr22	38477857	38478357	*	7.24	8.11	4.76	3.35	2.68e-08	1.1e-06
chr17	80183343	80183843	*	7.28	8.13	4.92	3.21	2.68e-08	1.1e-06
chr21	47240033	47240533	*	5.09	6.01	1.83	4.19	2.73e-08	1.11e-06
chr17	48676950	48677450	*	4.81	5.76	1.01	4.74	2.73e-08	1.11e-06
chr1	202021889	202022389	*	5.1	6.03	1.64	4.39	2.75e-08	1.12e-06
chr4	6330939	6331439	*	7.58	8.43	5.18	3.25	2.77e-08	1.12e-06
chr22	46403354	46403854	*	8.05	8.89	5.81	3.08	2.77e-08	1.12e-06
chr10	73821708	73822208	*	4.59	5.57	-0.29	5.86	2.79e-08	1.13e-06
chr3	125775432	125775932	*	7.25	8.1	4.93	3.17	2.8e-08	1.13e-06
chr1	1861040	1861540	*	5.23	6.11	2.57	3.53	2.8e-08	1.13e-06
chr22	36594805	36595305	*	6.51	7.4	3.7	3.71	2.82e-08	1.14e-06
chr7	5629815	5630315	*	5.28	6.22	1.55	4.67	2.82e-08	1.14e-06
chr7	151083001	151083501	*	6.04	6.93	3.2	3.74	2.82e-08	1.14e-06
chr1	153333136	153333636	*	7.37	8.22	5.04	3.18	2.83e-08	1.14e-06
chr1	55446534	55447034	*	6.76	7.65	4.06	3.59	2.84e-08	1.14e-06
chr16	71446026	71446526	*	5.13	6.03	2.2	3.83	2.84e-08	1.14e-06
chr19	15564597	15565097	*	4.73	5.71	-0.29	6	2.85e-08	1.14e-06
chr11	70416225	70416725	*	4.95	5.9	1.18	4.73	2.86e-08	1.14e-06
chr16	21554449	21554949	*	5.21	6.11	2.17	3.94	2.91e-08	1.16e-06
chr7	47679016	47679516	*	7.3	8.15	4.96	3.19	2.95e-08	1.17e-06
chr22	24167623	24168123	*	7.14	8.01	4.61	3.39	2.96e-08	1.18e-06
chr17	48559547	48560047	*	6.77	7.7	3.28	4.42	2.96e-08	1.18e-06
chr6	13570662	13571162	*	4.43	5.4	0.08	5.31	2.97e-08	1.18e-06
chr9	37422627	37423127	*	5.65	6.57	2.46	4.1	2.98e-08	1.18e-06
chr2	1480648	1481148	*	5.02	5.98	1.1	4.87	3e-08	1.19e-06
chr17	75299173	75299673	*	5.06	5.98	1.84	4.14	3.02e-08	1.19e-06
chr22	36544619	36545119	*	5.47	6.37	2.67	3.7	3.02e-08	1.2e-06
chr18	12062789	12063289	*	7.27	8.14	4.72	3.42	3.05e-08	1.2e-06
chr20	61698235	61698735	*	5.38	6.32	1.66	4.66	3.06e-08	1.21e-06
chr20	30457787	30458287	*	5.8	6.68	3.15	3.53	3.06e-08	1.21e-06
chr1	3556976	3557476	*	4.86	5.81	1.01	4.8	3.07e-08	1.21e-06
chr22	43650315	43650815	*	4.68	5.64	0.63	5.01	3.08e-08	1.21e-06
chr19	58175630	58176130	*	6.13	7.01	3.49	3.52	3.08e-08	1.21e-06
chr16	777300	777800	*	4.84	5.79	0.83	4.96	3.1e-08	1.21e-06
chr5	73935703	73936203	*	5.06	5.97	2	3.97	3.15e-08	1.23e-06
chr19	1295169	1295669	*	4.62	5.59	0.08	5.5	3.15e-08	1.23e-06
chr6	169391965	169392465	*	4.96	5.88	1.69	4.19	3.16e-08	1.23e-06
chr7	157934431	157934931	*	4.57	5.54	-0.29	5.83	3.17e-08	1.23e-06
chr4	1562162	1562662	*	4.51	5.48	-0.29	5.77	3.21e-08	1.25e-06
chr22	38840288	38840788	*	4.68	5.66	-0.29	5.95	3.23e-08	1.26e-06
chr6	160390439	160390939	*	6.09	7	3.01	3.99	3.24e-08	1.26e-06
chr1	1238270	1238770	*	4.65	5.62	0.08	5.53	3.25e-08	1.26e-06
chr14	101022591	101023091	*	4.55	5.53	-0.29	5.82	3.27e-08	1.27e-06
chr3	101397046	101397546	*	5.32	6.26	1.69	4.57	3.31e-08	1.28e-06
chr5	177623965	177624465	*	6.28	7.16	3.61	3.55	3.33e-08	1.28e-06
chr4	7257419	7257919	*	5.15	6.09	1.58	4.51	3.34e-08	1.29e-06
chr1	204451232	204451732	*	4.62	5.59	-0.29	5.88	3.35e-08	1.29e-06
chr16	11239471	11239971	*	4.57	5.55	-0.29	5.84	3.35e-08	1.29e-06
chr19	54614404	54614904	*	4.47	5.44	0.2	5.23	3.42e-08	1.31e-06
chr3	65793674	65794174	*	5.07	6.01	1.56	4.45	3.47e-08	1.33e-06
chr2	113192972	113193472	*	4.6	5.57	-0.29	5.87	3.48e-08	1.33e-06
chr17	73732615	73733115	*	7.21	8.08	4.63	3.45	3.49e-08	1.33e-06
chr11	64137181	64137681	*	4.82	5.78	0.48	5.31	3.52e-08	1.34e-06
chr3	52527080	52527580	*	4.54	5.5	0.2	5.3	3.52e-08	1.34e-06
chr22	24999003	24999503	*	4.54	5.52	-0.29	5.81	3.54e-08	1.35e-06
chr11	66016397	66016897	*	5.43	6.33	2.52	3.81	3.55e-08	1.35e-06
chr7	63250281	63250781	*	5.09	6.03	1.5	4.52	3.62e-08	1.38e-06
chr14	74195177	74195677	*	6.24	7.11	3.67	3.44	3.65e-08	1.38e-06
chr8	142113396	142113896	*	4.76	5.7	1.01	4.69	3.65e-08	1.38e-06
chr1	2158300	2158800	*	5.05	5.98	1.69	4.29	3.67e-08	1.39e-06
chr19	7991863	7992363	*	6.36	7.24	3.72	3.52	3.67e-08	1.39e-06
chr19	40361077	40361577	*	7.11	7.99	4.45	3.55	3.7e-08	1.4e-06
chr7	1490072	1490572	*	8.36	9.22	6.02	3.2	3.71e-08	1.4e-06
chr21	45726211	45726711	*	5.83	6.75	2.56	4.19	3.74e-08	1.41e-06
chr15	42264078	42264578	*	5.52	6.44	2.4	4.04	3.76e-08	1.41e-06
chr17	72824099	72824599	*	4.89	5.84	1.02	4.81	3.76e-08	1.41e-06
chr19	42497885	42498385	*	5.5	6.44	1.89	4.55	3.81e-08	1.43e-06
chr16	3627237	3627737	*	4.73	5.69	0.62	5.07	3.87e-08	1.45e-06
chr11	66114252	66114752	*	5.15	6.09	1.59	4.5	3.88e-08	1.45e-06
chr15	75331517	75332017	*	4.61	5.59	-0.29	5.88	3.9e-08	1.46e-06
chr16	56904807	56905307	*	4.88	5.82	1.18	4.64	3.95e-08	1.48e-06
chr22	39151495	39151995	*	6.8	7.68	4.04	3.64	3.98e-08	1.48e-06
chr15	74896573	74897073	*	4.68	5.6	1.35	4.26	4.01e-08	1.49e-06
chr14	103009584	103010084	*	6.44	7.3	4.01	3.29	4.01e-08	1.49e-06
chr10	1618145	1618645	*	5.2	6.14	1.49	4.65	4.02e-08	1.5e-06
chr16	11836031	11836531	*	6.59	7.47	3.97	3.5	4.03e-08	1.5e-06
chr11	64631562	64632062	*	5.83	6.74	2.78	3.96	4.06e-08	1.51e-06
chr10	134953370	134953870	*	5.52	6.42	2.69	3.73	4.08e-08	1.51e-06
chr22	30605293	30605793	*	5.75	6.67	2.62	4.05	4.09e-08	1.51e-06
chr1	3161815	3162315	*	4.5	5.47	-0.29	5.76	4.11e-08	1.52e-06
chr20	49206956	49207456	*	4.81	5.75	1.18	4.56	4.11e-08	1.52e-06
chr22	41776928	41777428	*	8.11	8.96	5.79	3.17	4.12e-08	1.52e-06
chr19	5799805	5800305	*	4.66	5.62	0.57	5.05	4.12e-08	1.52e-06
chr5	176516820	176517320	*	4.66	5.62	0.57	5.05	4.13e-08	1.52e-06
chr16	2880466	2880966	*	4.86	5.79	1.5	4.29	4.2e-08	1.54e-06
chr22	50964728	50965228	*	7.34	8.22	4.74	3.47	4.2e-08	1.54e-06
chr6	168444331	168444831	*	5.06	5.98	1.86	4.12	4.21e-08	1.54e-06
chr10	73625593	73626093	*	6.75	7.66	3.6	4.06	4.23e-08	1.55e-06
chr9	137207682	137208182	*	5.99	6.92	2.48	4.45	4.24e-08	1.55e-06
chr9	137629333	137629833	*	4.51	5.48	-0.29	5.77	4.25e-08	1.55e-06
chr11	65367379	65367879	*	5.44	6.36	2.15	4.21	4.26e-08	1.55e-06
chr20	33590496	33590996	*	5.66	6.61	1.93	4.68	4.26e-08	1.55e-06
chr15	91454271	91454771	*	5.17	6.08	2.13	3.95	4.3e-08	1.56e-06
chr17	37243745	37244245	*	4.84	5.78	1.01	4.77	4.3e-08	1.56e-06
chr9	131825047	131825547	*	4.54	5.51	0.2	5.31	4.32e-08	1.57e-06
chr20	57917917	57918417	*	4.71	5.65	1.01	4.64	4.34e-08	1.57e-06
chr19	46381220	46381720	*	5.19	6.13	1.69	4.44	4.35e-08	1.58e-06
chr15	42151594	42152094	*	4.63	5.58	0.57	5.02	4.36e-08	1.58e-06
chr7	2674680	2675180	*	8.41	9.24	6.27	2.96	4.39e-08	1.58e-06
chr11	74883141	74883641	*	4.97	5.87	2.19	3.67	4.39e-08	1.58e-06
chr1	16503849	16504349	*	4.56	5.53	-0.29	5.82	4.4e-08	1.58e-06
chr10	74082896	74083396	*	6	6.87	3.38	3.49	4.41e-08	1.59e-06
chr9	136725592	136726092	*	5.34	6.23	2.57	3.65	4.42e-08	1.59e-06
chr4	174089913	174090413	*	4.66	5.63	0.08	5.55	4.42e-08	1.59e-06
chr4	6330130	6330630	*	4.6	5.57	0.08	5.48	4.44e-08	1.59e-06
chr8	101322357	101322857	*	6.1	7.02	2.83	4.19	4.46e-08	1.6e-06
chr3	47205580	47206080	*	6.85	7.7	4.51	3.19	4.53e-08	1.62e-06
chr14	69290727	69291227	*	4.7	5.67	-0.29	5.97	4.54e-08	1.62e-06
chr16	88601489	88602483	*	5.82	6.75	2.43	4.32	4.55e-08	1.62e-06
chr6	33645297	33645797	*	8.49	9.36	5.98	3.37	4.59e-08	1.64e-06
chr9	140053360	140053860	*	5.85	6.74	3.13	3.6	4.63e-08	1.65e-06
chr22	19708365	19708865	*	5.99	6.89	3.15	3.74	4.63e-08	1.65e-06
chr20	43945969	43946469	*	4.84	5.79	1.01	4.78	4.66e-08	1.66e-06
chr22	20195200	20195700	*	7.94	8.79	5.53	3.26	4.68e-08	1.66e-06
chr3	48715958	48716458	*	4.95	5.86	1.96	3.9	4.7e-08	1.67e-06
chr1	95314338	95314838	*	5.29	6.2	2.25	3.95	4.75e-08	1.68e-06
chr8	144950022	144950522	*	6.91	7.74	4.7	3.04	4.8e-08	1.7e-06
chr22	23152612	23153112	*	4.49	5.47	-0.29	5.76	4.82e-08	1.7e-06
chr16	630539	631039	*	4.52	5.49	-0.29	5.79	4.88e-08	1.72e-06
chr22	35698950	35699450	*	4.49	5.46	-0.29	5.75	4.88e-08	1.72e-06
chr9	130706874	130707374	*	6.11	7.03	2.95	4.08	4.88e-08	1.72e-06
chr17	79485830	79486330	*	6.95	7.81	4.57	3.24	4.95e-08	1.74e-06
chr17	3880889	3881389	*	4.7	5.68	-0.29	5.97	4.97e-08	1.74e-06
chr16	1510678	1511178	*	6.57	7.41	4.28	3.13	4.99e-08	1.75e-06
chr16	31340915	31341415	*	5	5.93	1.64	4.29	4.99e-08	1.75e-06
chr9	136663801	136664301	*	4.55	5.5	0.63	4.87	5e-08	1.75e-06
chr22	22032211	22032711	*	4.63	5.61	-0.29	5.9	5.02e-08	1.75e-06
chr22	38302360	38302860	*	6.53	7.42	3.85	3.57	5.07e-08	1.77e-06
chr2	241402832	241403332	*	5.36	6.26	2.46	3.8	5.1e-08	1.78e-06
chr19	15442694	15443194	*	6.23	7.16	2.9	4.26	5.11e-08	1.78e-06
chr22	38624994	38625494	*	7.18	8.07	4.43	3.64	5.14e-08	1.79e-06
chr2	233321515	233322015	*	6.3	7.22	2.99	4.23	5.16e-08	1.79e-06
chr7	153585166	153585666	*	5.57	6.44	2.94	3.5	5.17e-08	1.79e-06
chr11	67804009	67804509	*	6.15	7.03	3.49	3.54	5.18e-08	1.8e-06
chr20	61997901	61998401	*	7.39	8.27	4.83	3.44	5.19e-08	1.8e-06
chr9	139585556	139586056	*	6.73	7.58	4.35	3.23	5.23e-08	1.81e-06
chr17	79880845	79881345	*	5.46	6.37	2.52	3.84	5.24e-08	1.81e-06
chr3	50685052	50685552	*	4.61	5.59	-0.29	5.88	5.25e-08	1.81e-06
chr22	45014076	45014576	*	7.67	8.52	5.36	3.15	5.27e-08	1.82e-06
chr20	61056296	61056796	*	5.26	6.17	2.21	3.96	5.29e-08	1.82e-06
chr11	76883061	76883561	*	5.5	6.44	1.98	4.46	5.3e-08	1.82e-06
chr20	60723254	60723754	*	4.81	5.73	1.71	4.02	5.34e-08	1.83e-06
chr12	131479254	131479754	*	4.72	5.69	-0.29	5.99	5.42e-08	1.86e-06
chr18	77371329	77371829	*	4.56	5.53	-0.29	5.83	5.47e-08	1.87e-06
chr5	579767	580267	*	5.73	6.59	3.32	3.27	5.5e-08	1.88e-06
chr12	113826082	113826582	*	6.64	7.5	4.21	3.29	5.5e-08	1.88e-06
chr15	68125874	68126374	*	7.6	8.45	5.35	3.1	5.51e-08	1.88e-06
chr7	100030308	100030808	*	4.79	5.77	-0.29	6.06	5.52e-08	1.88e-06
chr12	42631293	42631793	*	5.67	6.6	2.2	4.4	5.54e-08	1.89e-06
chr19	5056586	5057086	*	5.25	6.18	1.9	4.28	5.56e-08	1.89e-06
chr10	13341399	13341899	*	5.77	6.67	2.89	3.78	5.58e-08	1.89e-06
chr15	74242681	74243181	*	6.75	7.65	3.84	3.8	5.58e-08	1.89e-06
chr5	55290409	55290909	*	4.43	5.39	0.08	5.31	5.61e-08	1.9e-06
chr5	684946	685446	*	5.09	6	2.07	3.92	5.63e-08	1.91e-06
chr22	49575569	49576069	*	4.87	5.81	1.31	4.5	5.64e-08	1.91e-06
chr22	30926726	30927226	*	4.41	5.37	0.38	4.98	5.65e-08	1.91e-06
chr20	61037149	61037649	*	4.83	5.77	1.31	4.46	5.65e-08	1.91e-06
chr19	11565494	11565994	*	5.3	6.24	1.66	4.59	5.66e-08	1.91e-06
chr20	61874468	61874968	*	6.31	7.19	3.76	3.42	5.71e-08	1.92e-06
chr19	15891216	15891716	*	5.31	6.2	2.48	3.72	5.76e-08	1.94e-06
chr20	57617321	57617821	*	6.51	7.37	4.08	3.29	5.76e-08	1.94e-06
chr8	25315262	25315762	*	5.93	6.81	3.25	3.57	5.81e-08	1.95e-06
chr3	10377021	10377521	*	6.32	7.24	3.13	4.11	5.81e-08	1.95e-06
chr13	114515510	114516010	*	5.6	6.49	2.82	3.67	5.84e-08	1.95e-06
chr19	292363	292863	*	5.66	6.55	2.8	3.75	5.85e-08	1.95e-06
chr20	55667442	55667942	*	5.13	6.06	1.69	4.38	5.85e-08	1.95e-06
chr2	88359675	88360175	*	6.07	6.98	3.03	3.95	5.85e-08	1.95e-06
chr19	42767545	42768045	*	4.82	5.76	1.26	4.5	5.88e-08	1.96e-06
chr17	39956907	39957407	*	6.93	7.85	3.66	4.19	5.89e-08	1.96e-06
chr5	1998364	1998864	*	4.94	5.91	0.2	5.71	5.91e-08	1.97e-06
chr8	142345832	142346332	*	5.69	6.6	2.66	3.94	5.93e-08	1.97e-06
chr20	897570	898070	*	4.98	5.91	1.57	4.34	5.94e-08	1.97e-06
chr8	22228217	22228717	*	4.43	5.4	-0.29	5.69	5.96e-08	1.98e-06
chr1	160231658	160232158	*	5.51	6.4	2.71	3.68	5.97e-08	1.98e-06
chr20	25604187	25604687	*	4.68	5.65	0.08	5.57	5.98e-08	1.98e-06
chr11	36531106	36531606	*	6.52	7.39	3.95	3.44	5.99e-08	1.98e-06
chr9	140127882	140128382	*	4.61	5.56	0.62	4.94	6e-08	1.98e-06
chr2	176045642	176046142	*	5.78	6.68	2.88	3.81	6.06e-08	2e-06
chr16	2586259	2586759	*	6.58	7.44	4.13	3.31	6.08e-08	2e-06
chr3	14418349	14418849	*	4.93	5.85	1.8	4.05	6.09e-08	2e-06
chr17	65243871	65244371	*	6.79	7.66	4.25	3.41	6.12e-08	2.01e-06
chr16	2333066	2333566	*	5.01	5.93	1.7	4.23	6.17e-08	2.03e-06
chr14	24530548	24531048	*	5.76	6.65	3.03	3.62	6.19e-08	2.03e-06
chrX	153662398	153662898	*	4.39	5.35	0.08	5.27	6.19e-08	2.03e-06
chr4	1765216	1765716	*	6.83	7.69	4.4	3.29	6.21e-08	2.03e-06
chr10	74014700	74015200	*	6.92	7.79	4.38	3.41	6.21e-08	2.03e-06
chr5	1018859	1019359	*	7.09	8.01	3.77	4.24	6.24e-08	2.04e-06
chr16	88919888	88920388	*	5.75	6.62	3.2	3.42	6.25e-08	2.04e-06
chr1	11583283	11583783	*	6.66	7.52	4.25	3.27	6.26e-08	2.04e-06
chr7	101457344	101457844	*	6.12	6.99	3.62	3.37	6.3e-08	2.05e-06
chr12	125172150	125172650	*	4.6	5.58	-0.29	5.87	6.32e-08	2.06e-06
chr14	93572348	93572848	*	6.09	7.01	2.93	4.07	6.33e-08	2.06e-06
chr22	46392124	46392624	*	7.83	8.66	5.62	3.04	6.41e-08	2.08e-06
chr11	67158961	67159461	*	6.04	6.92	3.33	3.6	6.5e-08	2.11e-06
chr22	45555703	45556203	*	5.67	6.56	3.01	3.55	6.51e-08	2.11e-06
chr17	73509580	73510080	*	4.6	5.54	0.83	4.71	6.54e-08	2.11e-06
chr19	18063611	18064111	*	4.84	5.77	1.38	4.39	6.55e-08	2.11e-06
chr12	125050242	125050742	*	6.04	6.94	3.22	3.71	6.55e-08	2.11e-06
chr17	73342704	73343204	*	5.48	6.41	2.08	4.33	6.56e-08	2.11e-06
chr2	241708543	241709043	*	4.71	5.68	-0.29	5.97	6.61e-08	2.13e-06
chr19	48114038	48114538	*	6.24	7.14	3.27	3.87	6.63e-08	2.13e-06
chr1	206675430	206675930	*	4.66	5.63	-0.29	5.93	6.64e-08	2.13e-06
chr9	130882506	130883006	*	5.37	6.31	1.93	4.37	6.66e-08	2.14e-06
chr3	50355702	50356202	*	4.47	5.41	0.79	4.63	6.69e-08	2.15e-06
chr16	1464777	1465277	*	6.47	7.33	4.08	3.24	6.75e-08	2.16e-06
chr22	36684807	36685307	*	4.7	5.68	-0.29	5.97	6.76e-08	2.16e-06
chr1	2261984	2262484	*	4.4	5.37	-0.29	5.66	6.77e-08	2.16e-06
chr17	80597451	80597951	*	7.09	7.93	4.84	3.08	6.77e-08	2.16e-06
chr8	11448758	11449258	*	4.48	5.46	-0.29	5.75	6.77e-08	2.16e-06
chr2	120984226	120984726	*	4.52	5.49	-0.29	5.79	6.79e-08	2.17e-06
chr2	10209975	10210475	*	4.9	5.84	1.32	4.52	6.82e-08	2.17e-06
chr17	61590800	61591300	*	4.52	5.49	-0.29	5.79	6.84e-08	2.18e-06
chr15	45321669	45322169	*	4.61	5.58	-0.29	5.88	6.85e-08	2.18e-06
chr1	19638832	19639332	*	6.32	7.24	3.12	4.12	6.86e-08	2.18e-06
chr8	142355954	142356454	*	6.78	7.64	4.35	3.29	6.89e-08	2.19e-06
chr19	55697700	55698200	*	5.04	5.97	1.68	4.29	6.97e-08	2.21e-06
chr19	7953361	7953861	*	6.11	7	3.44	3.56	6.97e-08	2.21e-06
chr12	51441564	51442064	*	5.9	6.83	2.49	4.34	7.06e-08	2.23e-06
chr10	104411549	104412049	*	6.45	7.34	3.75	3.59	7.07e-08	2.23e-06
chr8	142956282	142956782	*	5.06	6.01	1.31	4.69	7.07e-08	2.23e-06
chr17	79702189	79702689	*	4.4	5.36	0.38	4.98	7.07e-08	2.23e-06
chr9	140388805	140389305	*	5.47	6.34	2.91	3.44	7.11e-08	2.24e-06
chr2	2649294	2649794	*	6.78	7.64	4.27	3.38	7.12e-08	2.24e-06
chr1	180136630	180137130	*	6.75	7.63	4.12	3.51	7.19e-08	2.26e-06
chr22	46264946	46265446	*	4.78	5.71	1.47	4.24	7.27e-08	2.28e-06
chr10	88295035	88295535	*	4.95	5.87	1.83	4.03	7.29e-08	2.29e-06
chr22	20214298	20214798	*	5.93	6.87	2.36	4.51	7.31e-08	2.29e-06
chr19	14117701	14118201	*	4.74	5.67	1.2	4.47	7.32e-08	2.29e-06
chr17	76337237	76337737	*	6.23	7.09	3.79	3.3	7.36e-08	2.3e-06
chr7	100047997	100048497	*	5.82	6.71	3.11	3.6	7.37e-08	2.3e-06
chr11	64453062	64453562	*	5.48	6.39	2.37	4.03	7.37e-08	2.3e-06
chr2	128392831	128393331	*	4.74	5.68	1.18	4.51	7.39e-08	2.3e-06
chr12	132974740	132975240	*	4.48	5.45	-0.29	5.75	7.41e-08	2.31e-06
chr20	61374926	61375426	*	4.82	5.8	-0.29	6.09	7.53e-08	2.34e-06
chr10	43789868	43790368	*	7.84	8.73	5.09	3.64	7.56e-08	2.35e-06
chr17	28881874	28882374	*	4.84	5.81	0.08	5.73	7.57e-08	2.35e-06
chr19	49580593	49581093	*	5.39	6.31	2.28	4.03	7.6e-08	2.35e-06
chr12	668713	669213	*	5.06	6	1.58	4.42	7.61e-08	2.36e-06
chr17	18010217	18010717	*	5.85	6.75	2.9	3.85	7.7e-08	2.38e-06
chr1	201349358	201349858	*	5.44	6.33	2.79	3.53	7.79e-08	2.41e-06
chr16	11878647	11879147	*	4.91	5.84	1.57	4.27	7.8e-08	2.41e-06
chr1	200977131	200977631	*	4.59	5.56	-0.29	5.85	7.87e-08	2.43e-06
chr15	85874203	85874703	*	6.27	7.17	3.29	3.89	7.9e-08	2.43e-06
chr16	30101506	30102006	*	6.36	7.24	3.67	3.57	7.91e-08	2.43e-06
chr17	73615644	73616144	*	5.01	5.91	2.02	3.89	7.97e-08	2.45e-06
chr17	79654124	79654624	*	4.62	5.59	0.08	5.51	8.04e-08	2.47e-06
chr18	11983619	11984119	*	5.87	6.75	3.3	3.44	8.08e-08	2.48e-06
chr10	5570787	5571287	*	4.94	5.87	1.53	4.35	8.2e-08	2.51e-06
chr2	233195601	233196101	*	6.43	7.29	3.99	3.29	8.25e-08	2.53e-06
chr1	110051688	110052188	*	5.61	6.52	2.51	4.01	8.27e-08	2.53e-06
chr2	233232041	233232541	*	6.58	7.44	4.17	3.26	8.41e-08	2.57e-06
chr16	58549618	58550118	*	4.93	5.83	2.08	3.75	8.42e-08	2.57e-06
chr11	64023631	64024131	*	5.95	6.85	3.17	3.67	8.47e-08	2.58e-06
chr17	18160725	18161225	*	4.45	5.4	0.63	4.77	8.48e-08	2.58e-06
chr20	62464417	62464917	*	5.09	6.02	1.68	4.34	8.55e-08	2.6e-06
chr9	138116197	138116697	*	4.4	5.34	0.71	4.64	8.73e-08	2.65e-06
chr1	153483235	153483735	*	4.97	5.89	1.7	4.2	8.74e-08	2.65e-06
chr17	73555045	73555545	*	4.37	5.34	-0.29	5.63	8.8e-08	2.67e-06
chr11	1856959	1857459	*	4.85	5.78	1.42	4.36	8.83e-08	2.68e-06
chr20	36030992	36031492	*	6.05	6.92	3.61	3.31	8.87e-08	2.68e-06
chr12	129056539	129057039	*	4.9	5.84	1.32	4.52	8.87e-08	2.68e-06
chr14	101343955	101344455	*	4.49	5.46	0.08	5.38	8.9e-08	2.69e-06
chr2	208031006	208031506	*	6.11	7.01	3.19	3.82	8.92e-08	2.69e-06
chr22	23496841	23497341	*	4.58	5.56	-0.29	5.85	8.94e-08	2.69e-06
chr14	101034240	101034740	*	4.82	5.76	1.18	4.59	8.96e-08	2.7e-06
chr16	416393	416893	*	4.91	5.84	1.5	4.34	9.12e-08	2.74e-06
chr22	51000965	51001465	*	4.76	5.7	1.18	4.52	9.21e-08	2.77e-06
chr4	1504546	1505046	*	4.49	5.46	-0.29	5.75	9.22e-08	2.77e-06
chr1	1977788	1978288	*	5.21	6.13	2.1	4.03	9.26e-08	2.78e-06
chr11	64035804	64036304	*	4.42	5.4	-0.29	5.69	9.3e-08	2.79e-06
chr5	149592805	149593305	*	5.24	6.18	1.79	4.39	9.35e-08	2.8e-06
chr8	145595574	145596074	*	4.57	5.52	0.84	4.68	9.38e-08	2.81e-06
chr12	12260607	12261107	*	6.18	7.1	3.02	4.08	9.43e-08	2.82e-06
chr16	67700789	67701289	*	6.9	7.83	3.59	4.24	9.8e-08	2.93e-06
chr20	61950623	61951123	*	7.16	8.01	4.77	3.24	9.83e-08	2.93e-06
chr19	17988420	17988920	*	4.97	5.92	1.32	4.59	9.98e-08	2.97e-06
chr1	45285106	45285606	*	4.61	5.56	0.84	4.72	1e-07	2.99e-06
chr17	80928225	80928725	*	4.36	5.33	-0.29	5.62	1.01e-07	3e-06
chr15	65028314	65028814	*	7.09	7.97	4.49	3.48	1.01e-07	3e-06
chr16	733771	734271	*	6.82	7.68	4.42	3.26	1.01e-07	3.01e-06
chr17	73554422	73554922	*	4.93	5.86	1.52	4.34	1.02e-07	3.01e-06
chr8	144945147	144945647	*	4.81	5.77	0.83	4.93	1.02e-07	3.02e-06
chr1	27886913	27887413	*	6.64	7.52	3.92	3.6	1.02e-07	3.03e-06
chr8	143895755	143896255	*	7.82	8.65	5.7	2.95	1.03e-07	3.06e-06
chr16	50660575	50661075	*	6.42	7.28	3.98	3.3	1.04e-07	3.06e-06
chr8	143084094	143084594	*	5.58	6.52	2.05	4.47	1.04e-07	3.06e-06
chr3	138178452	138178952	*	4.7	5.63	1.34	4.28	1.04e-07	3.06e-06
chr20	61086200	61086700	*	6.9	7.76	4.48	3.28	1.04e-07	3.07e-06
chr20	35984330	35984830	*	7.04	7.94	4.12	3.82	1.05e-07	3.08e-06
chr12	132060863	132061363	*	6.59	7.45	4.1	3.35	1.05e-07	3.08e-06
chr1	111682723	111683223	*	4.98	5.89	1.82	4.07	1.05e-07	3.08e-06
chr20	62703582	62704082	*	4.43	5.4	-0.29	5.69	1.05e-07	3.08e-06
chr11	801453	801953	*	4.72	5.65	1.37	4.28	1.05e-07	3.09e-06
chr20	31211495	31211995	*	6.1	7.02	2.99	4.03	1.05e-07	3.09e-06
chrX	49028646	49029146	*	4.74	5.71	-0.29	6.01	1.06e-07	3.09e-06
chr22	20226021	20226521	*	4.49	5.45	0.38	5.07	1.06e-07	3.09e-06
chr22	43119165	43119665	*	5.31	6.21	2.34	3.87	1.06e-07	3.09e-06
chr12	110518118	110518618	*	4.69	5.64	0.83	4.81	1.06e-07	3.09e-06
chr10	76994962	76995462	*	6.22	7.12	3.36	3.75	1.07e-07	3.13e-06
chr17	71468317	71468817	*	4.87	5.79	1.73	4.06	1.08e-07	3.13e-06
chr21	44412207	44412707	*	5.86	6.75	3.13	3.62	1.08e-07	3.15e-06
chr2	128398447	128398947	*	6.66	7.51	4.3	3.21	1.09e-07	3.15e-06
chr1	44069873	44070373	*	7.68	8.55	5.06	3.5	1.09e-07	3.16e-06
chr22	46909843	46910343	*	4.41	5.38	-0.29	5.67	1.09e-07	3.17e-06
chr3	48599739	48600239	*	6.4	7.27	3.89	3.38	1.09e-07	3.17e-06
chr16	89697489	89697989	*	4.8	5.74	1.01	4.73	1.1e-07	3.18e-06
chr17	26863996	26864496	*	6.77	7.61	4.46	3.16	1.11e-07	3.2e-06
chr10	99392759	99393259	*	4.82	5.76	1.18	4.58	1.11e-07	3.21e-06
chr15	91432751	91433251	*	5.89	6.78	3.05	3.73	1.11e-07	3.21e-06
chr16	28619394	28619894	*	5	5.93	1.47	4.47	1.12e-07	3.22e-06
chr19	35344090	35344590	*	4.52	5.49	-0.29	5.79	1.12e-07	3.22e-06
chr7	158062687	158063187	*	4.91	5.84	1.55	4.29	1.12e-07	3.23e-06
chr17	47997457	47997957	*	6.27	7.16	3.51	3.65	1.12e-07	3.23e-06
chr7	101245761	101246261	*	5.7	6.6	2.9	3.7	1.13e-07	3.24e-06
chr11	67209908	67210408	*	5.79	6.65	3.33	3.32	1.13e-07	3.25e-06
chr22	45015944	45016444	*	6.35	7.2	4	3.19	1.13e-07	3.25e-06
chr7	359245	359745	*	5	5.92	1.78	4.15	1.13e-07	3.25e-06
chr20	62680642	62681142	*	4.32	5.28	0.08	5.2	1.14e-07	3.26e-06
chr1	228250007	228250507	*	5.38	6.26	2.71	3.56	1.14e-07	3.26e-06
chr22	45825734	45826234	*	7.4	8.3	4.58	3.72	1.15e-07	3.28e-06
chr19	40900495	40900995	*	5.66	6.59	2.39	4.2	1.16e-07	3.31e-06
chr21	45234262	45234762	*	5.33	6.25	2.13	4.12	1.17e-07	3.33e-06
chr11	119560162	119560662	*	4.47	5.42	0.63	4.79	1.17e-07	3.34e-06
chr1	12237125	12237625	*	5.05	5.97	1.78	4.19	1.18e-07	3.35e-06
chr22	20192541	20193041	*	6.31	7.18	3.77	3.41	1.18e-07	3.35e-06
chr22	51064285	51064785	*	4.35	5.32	-0.29	5.61	1.18e-07	3.35e-06
chr15	89545679	89546179	*	4.79	5.72	1.31	4.41	1.18e-07	3.36e-06
chr11	70564287	70564787	*	5.13	6.02	2.36	3.66	1.2e-07	3.4e-06
chr4	1354410	1354910	*	4.52	5.47	0.38	5.09	1.21e-07	3.42e-06
chr2	129060606	129061106	*	4.36	5.33	-0.29	5.63	1.21e-07	3.43e-06
chr2	241949763	241950263	*	6.48	7.33	4.08	3.25	1.21e-07	3.43e-06
chr19	38844868	38845368	*	4.6	5.58	-0.29	5.87	1.22e-07	3.44e-06
chr5	131586908	131587408	*	4.77	5.7	1.33	4.36	1.23e-07	3.46e-06
chr8	145675235	145675735	*	4.44	5.41	-0.29	5.71	1.23e-07	3.46e-06
chr20	44455638	44456138	*	5.92	6.81	3.1	3.71	1.23e-07	3.47e-06
chr11	66842821	66843321	*	4.49	5.46	-0.29	5.75	1.24e-07	3.48e-06
chr20	61699057	61699557	*	5.91	6.79	3.29	3.5	1.24e-07	3.48e-06
chr10	133794920	133795420	*	4.41	5.39	-0.29	5.68	1.24e-07	3.48e-06
chr2	96026929	96027429	*	4.51	5.46	0.63	4.83	1.24e-07	3.49e-06
chr7	1865322	1865822	*	5.63	6.57	2.06	4.51	1.25e-07	3.49e-06
chr8	67528313	67528813	*	4.67	5.61	1.14	4.46	1.25e-07	3.49e-06
chr10	88714481	88714981	*	6.76	7.63	4.21	3.42	1.25e-07	3.49e-06
chr14	104166157	104166657	*	5.6	6.47	3.08	3.39	1.27e-07	3.53e-06
chr1	6319507	6320007	*	5.28	6.19	2.18	4.01	1.27e-07	3.53e-06
chr3	51997754	51998254	*	5.23	6.15	1.98	4.17	1.27e-07	3.54e-06
chr17	39967337	39967837	*	5.83	6.75	2.67	4.08	1.27e-07	3.54e-06
chr3	148847187	148847687	*	4.49	5.45	0.08	5.37	1.27e-07	3.55e-06
chr8	142441555	142442055	*	5.89	6.78	3.07	3.71	1.27e-07	3.55e-06
chr11	866219	866719	*	4.3	5.27	-0.29	5.56	1.28e-07	3.55e-06
chr1	2340202	2340702	*	5.51	6.38	2.92	3.46	1.28e-07	3.56e-06
chr16	3116788	3117288	*	5.59	6.51	2.41	4.1	1.29e-07	3.57e-06
chr1	2936128	2936628	*	5.07	5.97	2.14	3.83	1.29e-07	3.57e-06
chr12	109750046	109750546	*	4.31	5.27	0.2	5.06	1.29e-07	3.57e-06
chr12	121905613	121906113	*	4.69	5.61	1.38	4.23	1.3e-07	3.58e-06
chrX	20008483	20008983	*	6.22	7.11	3.43	3.68	1.3e-07	3.58e-06
chr2	239331911	239332411	*	4.77	5.71	1.19	4.52	1.3e-07	3.59e-06
chr1	155231542	155232042	*	4.64	5.57	1.14	4.43	1.31e-07	3.6e-06
chr8	142361117	142361617	*	5.15	6.07	1.98	4.08	1.31e-07	3.62e-06
chr6	166239597	166240097	*	5.76	6.64	3.1	3.54	1.31e-07	3.62e-06
chr4	2050044	2050544	*	5.13	6.04	2.17	3.87	1.33e-07	3.66e-06
chr22	19697923	19698423	*	7.37	8.22	4.94	3.28	1.34e-07	3.69e-06
chr20	43062591	43063091	*	4.59	5.53	1.04	4.49	1.35e-07	3.71e-06
chr1	65613942	65614442	*	4.52	5.5	-0.29	5.79	1.35e-07	3.72e-06
chr17	37852918	37853418	*	4.99	5.92	1.57	4.35	1.36e-07	3.72e-06
chr1	150527018	150527518	*	7.01	7.89	4.41	3.47	1.37e-07	3.75e-06
chr3	48613923	48614423	*	5.53	6.43	2.56	3.87	1.37e-07	3.75e-06
chr1	22157726	22158226	*	4.51	5.48	-0.29	5.77	1.37e-07	3.75e-06
chr10	551302	551802	*	4.73	5.66	1.32	4.34	1.38e-07	3.76e-06
chr22	39986628	39987128	*	4.75	5.69	1.1	4.59	1.41e-07	3.85e-06
chr9	132804692	132805192	*	4.7	5.68	-0.29	5.97	1.43e-07	3.91e-06
chr19	45348774	45349274	*	4.7	5.67	-0.29	5.97	1.44e-07	3.93e-06
chr22	19564043	19564543	*	7.01	7.87	4.49	3.38	1.44e-07	3.93e-06
chr17	27044174	27044674	*	8.55	9.38	6.43	2.94	1.45e-07	3.93e-06
chr1	19060657	19061157	*	5.72	6.64	2.52	4.12	1.45e-07	3.94e-06
chr20	61946586	61947086	*	6.57	7.44	3.98	3.46	1.47e-07	3.98e-06
chr10	116075052	116075552	*	4.42	5.4	-0.29	5.69	1.47e-07	3.98e-06
chr20	25198971	25199471	*	4.69	5.63	1.04	4.59	1.47e-07	3.98e-06
chr1	19990972	19991472	*	4.79	5.71	1.5	4.21	1.47e-07	3.98e-06
chr18	33160984	33161484	*	7.44	8.29	5.04	3.25	1.47e-07	3.99e-06
chr16	70739991	70740491	*	6.71	7.55	4.42	3.13	1.48e-07	4.01e-06
chr20	31187796	31188296	*	5.15	6.08	1.81	4.27	1.49e-07	4.01e-06
chr11	70857877	70858377	*	4.34	5.31	-0.29	5.6	1.5e-07	4.03e-06
chr1	1685045	1685545	*	5.93	6.78	3.6	3.17	1.5e-07	4.05e-06
chr8	6631216	6631716	*	4.49	5.44	0.62	4.82	1.54e-07	4.15e-06
chr17	28548206	28548706	*	7.72	8.56	5.47	3.09	1.55e-07	4.17e-06
chr1	236227708	236228208	*	6.31	7.16	3.94	3.22	1.56e-07	4.19e-06
chr16	69966434	69966934	*	5.38	6.28	2.44	3.84	1.57e-07	4.23e-06
chr22	25335120	25335620	*	5.08	6.04	1.1	4.93	1.59e-07	4.25e-06
chr19	3698903	3699403	*	4.52	5.47	0.62	4.85	1.59e-07	4.25e-06
chr10	11923689	11924189	*	4.62	5.54	1.4	4.15	1.59e-07	4.26e-06
chr9	130350124	130350624	*	4.39	5.36	-0.29	5.65	1.6e-07	4.27e-06
chr17	37772051	37772551	*	6.34	7.19	4.02	3.16	1.6e-07	4.28e-06
chr16	32347886	32348386	*	5.8	6.69	3.06	3.63	1.61e-07	4.29e-06
chr11	47414919	47415419	*	6.2	7.1	3.31	3.79	1.61e-07	4.3e-06
chr1	228582685	228583185	*	4.58	5.56	-0.29	5.85	1.62e-07	4.31e-06
chr2	131525514	131526014	*	5.38	6.27	2.69	3.57	1.63e-07	4.34e-06
chr22	29722723	29723223	*	4.63	5.57	0.9	4.67	1.64e-07	4.37e-06
chr19	1217794	1218294	*	5.09	5.99	2.09	3.9	1.65e-07	4.38e-06
chr8	144294577	144295077	*	5.37	6.3	1.99	4.31	1.65e-07	4.38e-06
chr22	50748618	50749118	*	5.5	6.4	2.62	3.78	1.65e-07	4.38e-06
chr1	2343217	2343717	*	7.03	7.88	4.75	3.13	1.66e-07	4.4e-06
chr9	137261918	137262418	*	4.48	5.45	-0.29	5.74	1.66e-07	4.4e-06
chr19	18411525	18412025	*	4.49	5.47	-0.29	5.76	1.66e-07	4.41e-06
chr2	129969164	129969664	*	4.42	5.39	-0.29	5.68	1.67e-07	4.42e-06
chr3	46746279	46746779	*	8	8.86	5.55	3.31	1.69e-07	4.46e-06
chr4	3232937	3233437	*	4.34	5.31	-0.29	5.6	1.72e-07	4.55e-06
chr1	12035402	12035902	*	4.3	5.27	-0.29	5.56	1.74e-07	4.58e-06
chr17	26826754	26827254	*	5.83	6.71	3.17	3.54	1.74e-07	4.6e-06
chr6	31347808	31348308	*	5.26	6.13	2.72	3.41	1.75e-07	4.6e-06
chr17	17145802	17146302	*	4.48	5.42	0.84	4.58	1.76e-07	4.63e-06
chr9	139876480	139876980	*	4.29	5.26	-0.29	5.55	1.77e-07	4.65e-06
chr1	2244001	2244501	*	6.73	7.63	3.9	3.73	1.78e-07	4.67e-06
chr17	40902581	40903081	*	5.56	6.47	2.42	4.05	1.78e-07	4.68e-06
chr4	700800	701300	*	4.86	5.75	2.03	3.73	1.78e-07	4.68e-06
chr22	24585666	24586166	*	6.12	6.97	3.81	3.16	1.8e-07	4.72e-06
chr17	38170093	38170593	*	6.62	7.49	4	3.49	1.82e-07	4.75e-06
chr3	69788713	69789213	*	7.61	8.44	5.48	2.96	1.84e-07	4.8e-06
chr16	3065769	3066269	*	6.37	7.21	4.09	3.12	1.85e-07	4.83e-06
chr7	2191218	2191718	*	5.58	6.48	2.66	3.82	1.87e-07	4.87e-06
chr11	68843708	68844208	*	4.88	5.8	1.73	4.07	1.88e-07	4.89e-06
chr10	1297578	1298078	*	4.76	5.68	1.48	4.2	1.88e-07	4.89e-06
chr19	45410650	45411150	*	4.46	5.43	-0.29	5.72	1.89e-07	4.93e-06
chr15	91406179	91406679	*	4.32	5.29	-0.29	5.58	1.9e-07	4.94e-06
chr15	57833489	57833989	*	5.21	6.13	1.98	4.15	1.9e-07	4.94e-06
chr1	26859501	26860001	*	4.22	5.19	-0.29	5.48	1.91e-07	4.96e-06
chr6	157543276	157543776	*	4.47	5.44	-0.29	5.74	1.93e-07	5.02e-06
chr17	7162656	7163156	*	5.02	5.92	2.13	3.79	1.95e-07	5.06e-06
chr11	120856490	120856990	*	6.73	7.61	4.07	3.53	1.96e-07	5.07e-06
chr3	52551872	52552372	*	6.66	7.58	3.43	4.15	1.96e-07	5.07e-06
chr9	20684410	20684910	*	6.33	7.2	3.84	3.36	1.96e-07	5.07e-06
chr9	136515051	136515551	*	5.64	6.5	3.15	3.35	1.97e-07	5.08e-06
chr17	65242014	65242514	*	6.04	6.91	3.55	3.36	1.97e-07	5.08e-06
chr7	37960324	37960824	*	6.93	7.8	4.36	3.44	1.97e-07	5.09e-06
chr9	114245163	114245663	*	4.64	5.56	1.42	4.13	1.98e-07	5.09e-06
chr22	22041042	22041542	*	4.27	5.23	-0.29	5.53	1.98e-07	5.09e-06
chr7	73388679	73389179	*	5.37	6.27	2.47	3.8	1.98e-07	5.11e-06
chr3	58476784	58477284	*	5.36	6.23	2.79	3.43	1.99e-07	5.12e-06
chr22	39658124	39658624	*	6.44	7.29	4.16	3.13	1.99e-07	5.12e-06
chr16	88877932	88878432	*	4.28	5.24	0.08	5.16	2e-07	5.14e-06
chr1	203052557	203053057	*	6.75	7.62	4.13	3.49	2.01e-07	5.16e-06
chr11	63771780	63772280	*	4.36	5.33	-0.29	5.62	2.01e-07	5.16e-06
chr5	179563278	179563778	*	4.84	5.79	0.86	4.93	2.04e-07	5.21e-06
chr22	27018336	27018836	*	4.77	5.69	1.59	4.1	2.04e-07	5.22e-06
chr1	62208179	62208679	*	7.24	8.12	4.67	3.45	2.04e-07	5.22e-06
chr9	138444346	138444846	*	5.51	6.4	2.79	3.6	2.06e-07	5.26e-06
chr8	142379384	142379884	*	5.93	6.79	3.49	3.3	2.07e-07	5.27e-06
chr10	100131095	100131595	*	4.71	5.62	1.52	4.1	2.07e-07	5.27e-06
chr22	30141144	30141644	*	5.9	6.77	3.35	3.42	2.09e-07	5.32e-06
chr11	782118	782618	*	4.72	5.65	1.23	4.42	2.09e-07	5.32e-06
chr11	117699610	117700110	*	6.16	7.05	3.4	3.65	2.1e-07	5.33e-06
chr19	1166740	1167240	*	5.7	6.59	2.95	3.64	2.1e-07	5.33e-06
chr9	130511792	130512292	*	6.77	7.58	4.71	2.88	2.11e-07	5.35e-06
chr9	129389190	129389690	*	5.33	6.19	2.87	3.32	2.11e-07	5.35e-06
chr21	45562797	45563297	*	5.74	6.58	3.54	3.04	2.12e-07	5.36e-06
chr20	3654120	3654620	*	4.99	5.92	1.58	4.34	2.12e-07	5.36e-06
chr9	136753856	136754356	*	4.6	5.52	1.35	4.17	2.13e-07	5.39e-06
chr7	100927915	100928415	*	4.31	5.26	0.57	4.69	2.14e-07	5.4e-06
chr17	16784142	16784642	*	4.93	5.85	1.63	4.22	2.14e-07	5.4e-06
chr5	302552	303052	*	7.13	7.96	5	2.96	2.14e-07	5.4e-06
chr4	2405083	2405583	*	4.4	5.36	0.08	5.28	2.16e-07	5.44e-06
chr19	14098426	14098926	*	4.57	5.54	-0.29	5.84	2.16e-07	5.44e-06
chr6	43473345	43473845	*	5.13	6.04	2.15	3.89	2.18e-07	5.48e-06
chr11	113888468	113888968	*	4.59	5.53	1.01	4.51	2.18e-07	5.49e-06
chr22	50967655	50968155	*	4.41	5.37	0.08	5.29	2.19e-07	5.5e-06
chr22	35706068	35706568	*	5.31	6.23	2.13	4.11	2.19e-07	5.5e-06
chr11	116706838	116707338	*	4.6	5.52	1.46	4.06	2.19e-07	5.5e-06
chr16	89989740	89990240	*	4.79	5.72	1.32	4.4	2.19e-07	5.5e-06
chr3	124498716	124499216	*	6.26	7.1	3.94	3.17	2.2e-07	5.51e-06
chr16	67574575	67575075	*	6.06	6.9	3.83	3.07	2.21e-07	5.52e-06
chr9	136358977	136359477	*	7.1	7.98	4.53	3.45	2.22e-07	5.54e-06
chr2	241735288	241735788	*	5.36	6.29	1.98	4.31	2.22e-07	5.54e-06
chr11	62313793	62314293	*	6.63	7.48	4.22	3.26	2.22e-07	5.55e-06
chr1	201431277	201431777	*	5.12	6.02	2.24	3.77	2.24e-07	5.59e-06
chr15	41252826	41253326	*	4.35	5.31	0.38	4.92	2.24e-07	5.59e-06
chr3	52825674	52826174	*	4.8	5.77	0.2	5.57	2.25e-07	5.6e-06
chr1	61654622	61655122	*	4.21	5.18	-0.29	5.47	2.25e-07	5.61e-06
chr11	117666571	117667071	*	4.68	5.6	1.46	4.14	2.26e-07	5.63e-06
chr2	47330605	47331105	*	4.28	5.24	0.08	5.16	2.28e-07	5.66e-06
chr16	1389351	1389851	*	4.21	5.17	-0.29	5.47	2.28e-07	5.66e-06
chr1	211751797	211752297	*	4.34	5.31	-0.29	5.6	2.28e-07	5.66e-06
chr7	1578428	1578928	*	8.31	9.15	6.03	3.12	2.29e-07	5.66e-06
chr1	29446936	29447436	*	5.06	5.98	1.79	4.19	2.29e-07	5.66e-06
chr19	18968231	18968731	*	4.35	5.33	-0.29	5.62	2.29e-07	5.66e-06
chr10	105240437	105240937	*	6.92	7.75	4.67	3.09	2.29e-07	5.67e-06
chr1	9658225	9658725	*	4.28	5.25	-0.29	5.54	2.3e-07	5.67e-06
chr15	42173257	42173757	*	5.49	6.37	2.75	3.62	2.3e-07	5.67e-06
chr22	45283818	45284318	*	5.6	6.45	3.18	3.27	2.31e-07	5.7e-06
chr19	48113134	48113634	*	5.8	6.7	2.82	3.88	2.31e-07	5.7e-06
chr4	1358308	1358808	*	5.4	6.3	2.51	3.78	2.33e-07	5.74e-06
chr5	1837502	1838002	*	7.7	8.51	5.62	2.89	2.34e-07	5.74e-06
chr4	680400	680900	*	7.5	8.32	5.39	2.93	2.34e-07	5.74e-06
chr22	22226318	22226818	*	4.4	5.37	-0.29	5.66	2.34e-07	5.74e-06
chr17	2678594	2679094	*	5.05	5.97	1.8	4.17	2.35e-07	5.75e-06
chr14	106380568	106381068	*	4.91	5.82	1.79	4.04	2.35e-07	5.75e-06
chr11	67028575	67029075	*	6.45	7.31	4	3.31	2.36e-07	5.77e-06
chr20	62473119	62473619	*	5.18	6.11	1.58	4.54	2.37e-07	5.81e-06
chr2	10573857	10574357	*	7.16	8.01	4.79	3.22	2.38e-07	5.81e-06
chr22	38844785	38845285	*	4.34	5.31	-0.29	5.6	2.38e-07	5.81e-06
chr1	993374	993874	*	4.33	5.3	-0.29	5.59	2.39e-07	5.84e-06
chr19	18714223	18714723	*	6.37	7.25	3.69	3.56	2.4e-07	5.85e-06
chr1	169454695	169455195	*	4.92	5.82	2.11	3.71	2.4e-07	5.85e-06
chr3	51993149	51993649	*	4.52	5.47	0.62	4.85	2.42e-07	5.89e-06
chr22	28398900	28399400	*	8.4	9.25	6.1	3.14	2.43e-07	5.91e-06
chr22	37579254	37579754	*	6.4	7.28	3.84	3.44	2.43e-07	5.91e-06
chr10	1251603	1252103	*	5.07	5.96	2.23	3.73	2.43e-07	5.91e-06
chr14	67913009	67913509	*	4.36	5.32	0.2	5.12	2.43e-07	5.91e-06
chr22	20989353	20989853	*	6.96	7.8	4.68	3.12	2.45e-07	5.94e-06
chr11	9280474	9280974	*	5.29	6.18	2.52	3.65	2.46e-07	5.96e-06
chr19	19203233	19203733	*	4.26	5.23	-0.29	5.52	2.46e-07	5.96e-06
chr5	176760973	176761473	*	4.23	5.2	-0.29	5.49	2.47e-07	5.97e-06
chr10	65471131	65471631	*	4.69	5.63	1.08	4.55	2.47e-07	5.98e-06
chr22	37871713	37872213	*	6.38	7.21	4.22	2.99	2.5e-07	6.03e-06
chr2	241978347	241978847	*	4.45	5.42	-0.29	5.72	2.51e-07	6.06e-06
chr2	242154578	242155078	*	6.06	6.91	3.75	3.16	2.51e-07	6.06e-06
chr1	27884427	27884927	*	4.73	5.66	1.18	4.49	2.52e-07	6.06e-06
chr2	220093683	220094183	*	8.07	8.91	5.79	3.12	2.52e-07	6.06e-06
chr15	75484523	75485023	*	4.46	5.4	0.83	4.57	2.53e-07	6.1e-06
chr2	241658808	241659308	*	7.41	8.27	4.94	3.34	2.54e-07	6.1e-06
chr18	10565455	10565955	*	6.53	7.4	3.95	3.45	2.55e-07	6.12e-06
chr11	69635105	69635605	*	6.19	7.11	3.08	4.02	2.55e-07	6.13e-06
chr5	180073870	180074370	*	6.46	7.28	4.33	2.96	2.56e-07	6.13e-06
chr16	2750312	2750812	*	4.36	5.33	-0.29	5.62	2.56e-07	6.14e-06
chr1	3199973	3200473	*	4.52	5.44	1.43	4.01	2.57e-07	6.15e-06
chr16	69517	70017	*	4.27	5.23	0.08	5.15	2.57e-07	6.15e-06
chr4	53524729	53525229	*	4.49	5.47	-0.29	5.76	2.6e-07	6.21e-06
chr9	139648567	139649067	*	4.41	5.39	-0.29	5.68	2.6e-07	6.21e-06
chr16	84988995	84989495	*	6.64	7.48	4.38	3.1	2.6e-07	6.21e-06
chr2	242695217	242695717	*	7.1	7.93	4.89	3.04	2.6e-07	6.21e-06
chr19	43031509	43032009	*	4.68	5.65	0.08	5.57	2.61e-07	6.21e-06
chr1	970985	971485	*	5.04	5.97	1.58	4.4	2.61e-07	6.23e-06
chr6	158480628	158481128	*	4.73	5.66	1.26	4.4	2.63e-07	6.27e-06
chr5	132108535	132109035	*	5.03	5.92	2.22	3.7	2.65e-07	6.3e-06
chr2	109402792	109403292	*	4.38	5.35	-0.29	5.64	2.66e-07	6.32e-06
chr11	71505679	71506179	*	4.4	5.35	0.62	4.73	2.67e-07	6.34e-06
chr8	143832174	143832674	*	6.22	7.08	3.81	3.27	2.69e-07	6.38e-06
chr12	48347421	48347921	*	4.36	5.31	0.62	4.69	2.69e-07	6.38e-06
chr1	16357033	16357533	*	4.86	5.78	1.77	4.01	2.7e-07	6.39e-06
chr9	136016208	136016708	*	4.39	5.33	0.86	4.47	2.71e-07	6.41e-06
chr2	131113091	131113591	*	7.85	8.76	4.79	3.97	2.71e-07	6.41e-06
chr15	67256439	67256939	*	4.27	5.24	-0.29	5.53	2.72e-07	6.43e-06
chr8	1792321	1792821	*	4.54	5.45	1.52	3.93	2.72e-07	6.43e-06
chr4	15999281	15999781	*	4.39	5.35	0.38	4.96	2.76e-07	6.51e-06
chr19	1214848	1215348	*	4.2	5.17	-0.29	5.46	2.76e-07	6.51e-06
chr19	1474270	1474770	*	4.25	5.22	-0.29	5.51	2.78e-07	6.54e-06
chr11	48014921	48015421	*	4.47	5.43	0.38	5.05	2.78e-07	6.54e-06
chr3	38040049	38040549	*	5.9	6.79	3	3.8	2.8e-07	6.58e-06
chr11	16824395	16824895	*	4.51	5.44	1.1	4.34	2.81e-07	6.59e-06
chr18	71946092	71946592	*	4.34	5.29	0.38	4.91	2.81e-07	6.61e-06
chr11	67777899	67778399	*	6.93	7.77	4.66	3.12	2.82e-07	6.62e-06
chr12	46383958	46384458	*	5.81	6.72	2.77	3.96	2.83e-07	6.63e-06
chr22	30657406	30657906	*	4.5	5.46	0.08	5.38	2.84e-07	6.65e-06
chr12	130739401	130739901	*	4.22	5.17	0.38	4.79	2.85e-07	6.67e-06
chr17	4693276	4693776	*	4.47	5.41	0.83	4.57	2.86e-07	6.68e-06
chr1	16073698	16074198	*	4.49	5.41	1.18	4.23	2.86e-07	6.68e-06
chr2	97198108	97198608	*	4.77	5.69	1.59	4.09	2.89e-07	6.75e-06
chr3	10806365	10806865	*	4.27	5.22	0.57	4.65	2.89e-07	6.75e-06
chr20	46368874	46369374	*	4.65	5.61	0.62	4.98	2.9e-07	6.75e-06
chr20	33874061	33874561	*	4.52	5.46	0.83	4.63	2.92e-07	6.8e-06
chr16	70516241	70516741	*	4.27	5.24	-0.29	5.53	2.93e-07	6.83e-06
chr1	31906330	31906830	*	7.12	8	4.52	3.48	2.94e-07	6.84e-06
chr22	49086414	49086914	*	4.39	5.33	0.84	4.49	2.96e-07	6.88e-06
chr22	39755027	39755527	*	4.29	5.24	0.57	4.67	2.96e-07	6.88e-06
chr22	46401675	46402175	*	6.4	7.26	3.98	3.27	2.97e-07	6.89e-06
chr16	1790923	1791423	*	6.5	7.39	3.74	3.65	2.99e-07	6.94e-06
chr12	294663	295163	*	4.16	5.13	-0.29	5.42	3e-07	6.96e-06
chr16	890060	890560	*	6.25	7.1	3.96	3.14	3.01e-07	6.97e-06
chr15	78423956	78424456	*	6.31	7.18	3.84	3.34	3.01e-07	6.97e-06
chr15	80696293	80696793	*	5.29	6.15	2.83	3.33	3.03e-07	7e-06
chr17	1953382	1953882	*	6.46	7.38	3.28	4.1	3.04e-07	7.03e-06
chr17	19312389	19312889	*	6.25	7.09	4.02	3.07	3.05e-07	7.03e-06
chr3	13069813	13070313	*	6.92	7.75	4.8	2.94	3.05e-07	7.05e-06
chr22	38699134	38699634	*	7.84	8.69	5.51	3.18	3.08e-07	7.09e-06
chr8	11203652	11204152	*	4.51	5.49	-0.29	5.78	3.11e-07	7.16e-06
chr11	65793952	65794452	*	6.23	7.13	3.25	3.88	3.11e-07	7.16e-06
chr7	65542736	65543236	*	4.72	5.64	1.61	4.02	3.12e-07	7.17e-06
chr11	44949763	44950263	*	5.2	6.13	1.8	4.33	3.13e-07	7.19e-06
chr17	79208905	79209405	*	5.12	6.02	2.23	3.8	3.14e-07	7.22e-06
chr11	764961	765461	*	5.29	6.19	2.34	3.85	3.15e-07	7.22e-06
chr4	1563187	1563687	*	5.05	5.97	1.9	4.07	3.15e-07	7.23e-06
chr20	33863699	33864199	*	6.51	7.34	4.36	2.97	3.17e-07	7.27e-06
chr12	2985705	2986205	*	4.85	5.78	1.45	4.33	3.18e-07	7.28e-06
chr22	39778814	39779314	*	6.54	7.39	4.18	3.21	3.21e-07	7.35e-06
chr1	41789208	41789708	*	4.54	5.47	1.1	4.37	3.23e-07	7.38e-06
chr1	113165872	113166372	*	4.26	5.22	0.08	5.14	3.24e-07	7.4e-06
chr8	143667607	143668107	*	6.28	7.14	3.82	3.32	3.25e-07	7.41e-06
chr5	177765328	177765828	*	4.34	5.31	-0.29	5.6	3.26e-07	7.45e-06
chr17	78805311	78805811	*	6.65	7.54	3.92	3.62	3.3e-07	7.52e-06
chr17	62040040	62040540	*	4.76	5.74	-0.29	6.03	3.31e-07	7.54e-06
chr9	131794644	131795144	*	4.15	5.11	-0.29	5.41	3.33e-07	7.58e-06
chr3	53294280	53294780	*	5.6	6.46	3.18	3.28	3.34e-07	7.61e-06
chr17	76171190	76171690	*	5.26	6.16	2.37	3.78	3.35e-07	7.61e-06
chr5	137779362	137779862	*	4.32	5.27	0.38	4.89	3.38e-07	7.67e-06
chr15	31619790	31620290	*	6.52	7.36	4.22	3.14	3.4e-07	7.72e-06
chr22	41813915	41814415	*	5.71	6.59	3.15	3.43	3.43e-07	7.77e-06
chr9	130707866	130708366	*	6.07	6.91	3.83	3.09	3.44e-07	7.79e-06
chr5	139169617	139170117	*	5.67	6.57	2.74	3.83	3.44e-07	7.79e-06
chr9	34567303	34567803	*	4.27	5.24	-0.29	5.53	3.44e-07	7.79e-06
chr15	65108674	65109174	*	7.72	8.57	5.39	3.18	3.46e-07	7.82e-06
chr10	133450859	133451359	*	5.32	6.21	2.64	3.57	3.46e-07	7.82e-06
chr4	672989	673489	*	6.13	7	3.59	3.41	3.47e-07	7.83e-06
chr22	39603901	39604401	*	5.67	6.54	3.14	3.4	3.48e-07	7.85e-06
chr1	36795327	36795827	*	7.19	8.05	4.84	3.21	3.49e-07	7.85e-06
chr19	33727332	33727832	*	4.42	5.39	-0.29	5.68	3.49e-07	7.85e-06
chr19	5877505	5878005	*	4.33	5.27	0.57	4.7	3.49e-07	7.85e-06
chr16	70775592	70776092	*	6.21	7.06	3.87	3.19	3.49e-07	7.85e-06
chr16	2258757	2259257	*	6.97	7.8	4.83	2.97	3.5e-07	7.85e-06
chr4	8534069	8534569	*	4.28	5.21	0.79	4.43	3.5e-07	7.86e-06
chr22	50629527	50630027	*	5.27	6.19	2.09	4.1	3.51e-07	7.88e-06
chr5	848629	849129	*	4.59	5.5	1.56	3.95	3.52e-07	7.89e-06
chr20	35402566	35403066	*	6.9	7.81	3.81	4	3.52e-07	7.89e-06
chr19	18627367	18627867	*	4.59	5.52	1.1	4.42	3.53e-07	7.9e-06
chr21	47208208	47208708	*	4.46	5.4	0.86	4.54	3.54e-07	7.91e-06
chr1	53494300	53494800	*	5.69	6.59	2.8	3.79	3.54e-07	7.91e-06
chr3	50585177	50585677	*	4.95	5.85	2.11	3.74	3.55e-07	7.93e-06
chr14	105198744	105199244	*	4.42	5.36	0.84	4.52	3.58e-07	7.98e-06
chr17	77786717	77787217	*	6.85	7.71	4.45	3.26	3.58e-07	7.98e-06
chr11	120828904	120829404	*	4.28	5.25	-0.29	5.54	3.6e-07	8.01e-06
chr1	109812271	109812771	*	5.52	6.44	2.31	4.13	3.6e-07	8.01e-06
chr2	10572464	10572964	*	6.73	7.58	4.4	3.18	3.61e-07	8.02e-06
chr8	143867039	143867539	*	5.19	6.1	2.17	3.94	3.61e-07	8.03e-06
chr14	105815259	105815759	*	7.27	8.11	5.04	3.07	3.62e-07	8.03e-06
chr16	70692818	70693318	*	5.24	6.17	1.79	4.38	3.62e-07	8.03e-06
chr15	74658109	74658609	*	6	6.86	3.61	3.25	3.62e-07	8.03e-06
chr19	2376462	2376962	*	6.16	7.05	3.42	3.63	3.62e-07	8.03e-06
chr1	228359090	228359590	*	6.87	7.78	3.78	4	3.63e-07	8.03e-06
chr1	226826834	226827334	*	4.65	5.58	1.26	4.32	3.65e-07	8.07e-06
chr15	69757543	69758043	*	4.45	5.42	-0.29	5.71	3.65e-07	8.07e-06
chr14	103244058	103244558	*	4.27	5.21	0.62	4.59	3.65e-07	8.08e-06
chr1	111153089	111153589	*	5.32	6.23	2.19	4.05	3.66e-07	8.09e-06
chr1	178971915	178972415	*	5.45	6.35	2.5	3.85	3.71e-07	8.19e-06
chr22	19137744	19138244	*	4.19	5.16	-0.29	5.45	3.73e-07	8.22e-06
chr22	36832402	36832902	*	7.34	8.2	4.92	3.27	3.75e-07	8.27e-06
chr21	47357473	47357973	*	4.46	5.4	0.97	4.42	3.75e-07	8.27e-06
chr17	48752886	48753386	*	4.69	5.59	1.73	3.86	3.76e-07	8.27e-06
chr22	43029269	43029769	*	5.63	6.53	2.7	3.82	3.76e-07	8.28e-06
chr2	129354384	129354884	*	5.61	6.52	2.61	3.91	3.77e-07	8.29e-06
chr15	44119102	44119602	*	4.28	5.25	-0.29	5.55	3.78e-07	8.31e-06
chr17	17432315	17432815	*	4.22	5.19	-0.29	5.48	3.8e-07	8.33e-06
chr17	38637170	38637670	*	4.36	5.33	-0.29	5.62	3.8e-07	8.33e-06
chr17	42031587	42032087	*	5.11	5.98	2.63	3.35	3.81e-07	8.34e-06
chr12	50263389	50263889	*	4.62	5.54	1.52	4.01	3.93e-07	8.6e-06
chr16	2050310	2050810	*	6.35	7.17	4.27	2.89	3.96e-07	8.67e-06
chr4	8594162	8594662	*	4.46	5.43	-0.29	5.72	3.97e-07	8.68e-06
chr22	39165166	39165666	*	7.61	8.44	5.43	3.01	3.98e-07	8.69e-06
chr19	2645332	2645832	*	5.03	5.93	2.21	3.72	3.98e-07	8.69e-06
chr10	75636124	75636624	*	4.32	5.29	-0.29	5.58	3.98e-07	8.69e-06
chr7	149520962	149521462	*	6.07	6.99	2.91	4.08	3.99e-07	8.7e-06
chr3	47027035	47027535	*	4.34	5.25	1.24	4.01	3.99e-07	8.7e-06
chr3	47292159	47292659	*	4.66	5.59	1.32	4.26	4e-07	8.71e-06
chr8	143585219	143585719	*	5.51	6.41	2.56	3.85	4e-07	8.71e-06
chr11	133894949	133895449	*	6.52	7.33	4.47	2.87	4.02e-07	8.75e-06
chr7	2416400	2416900	*	7.97	8.81	5.67	3.14	4.03e-07	8.76e-06
chr11	1224568	1225068	*	5.1	6.01	1.98	4.04	4.07e-07	8.83e-06
chr7	157658288	157658788	*	6.05	6.89	3.78	3.12	4.07e-07	8.83e-06
chr1	53533144	53533644	*	4.56	5.5	0.79	4.72	4.07e-07	8.83e-06
chr1	234541259	234541759	*	4.52	5.46	0.83	4.63	4.08e-07	8.83e-06
chr1	226094043	226094543	*	5.18	6.06	2.47	3.59	4.11e-07	8.9e-06
chr16	32351117	32351617	*	8.11	8.91	6.19	2.72	4.15e-07	8.98e-06
chr17	48287112	48287612	*	6.44	7.29	4.06	3.24	4.16e-07	8.98e-06
chr17	76533180	76533680	*	4.36	5.28	1.18	4.09	4.17e-07	9.01e-06
chr7	2577860	2578360	*	4.39	5.36	-0.29	5.66	4.19e-07	9.04e-06
chr11	3149932	3150432	*	4.99	5.88	2.2	3.68	4.22e-07	9.1e-06
chr16	2270336	2270836	*	4.29	5.26	-0.29	5.55	4.23e-07	9.12e-06
chr19	41928951	41929451	*	4.19	5.16	-0.29	5.45	4.24e-07	9.14e-06
chr8	144643713	144644213	*	4.19	5.16	-0.29	5.45	4.26e-07	9.17e-06
chr20	60899427	60899927	*	5.07	6	1.58	4.43	4.27e-07	9.18e-06
chr4	108657928	108658428	*	4.23	5.2	-0.29	5.49	4.28e-07	9.21e-06
chr10	102732017	102732517	*	4.19	5.16	-0.29	5.45	4.29e-07	9.21e-06
chr15	74070225	74070725	*	4.2	5.15	0.38	4.76	4.3e-07	9.23e-06
chr1	225649224	225649724	*	4.88	5.74	2.38	3.36	4.31e-07	9.23e-06
chr16	88833942	88834442	*	6.24	7.13	3.52	3.61	4.33e-07	9.27e-06
chr9	35657263	35657763	*	4.55	5.53	-0.29	5.82	4.33e-07	9.27e-06
chr8	142241156	142241656	*	5.83	6.68	3.46	3.21	4.34e-07	9.29e-06
chr9	116844276	116844776	*	4.34	5.29	0.63	4.66	4.37e-07	9.34e-06
chr13	114795146	114795646	*	5.33	6.2	2.79	3.41	4.39e-07	9.38e-06
chr16	85346750	85347250	*	6.86	7.73	4.35	3.39	4.41e-07	9.41e-06
chr1	111026463	111026963	*	4.66	5.57	1.63	3.94	4.41e-07	9.42e-06
chr9	95784463	95784963	*	5.09	5.99	2.23	3.76	4.43e-07	9.45e-06
chr4	1758607	1759107	*	5.15	6.03	2.56	3.47	4.45e-07	9.49e-06
chr22	50584858	50585358	*	4.83	5.76	1.31	4.45	4.5e-07	9.58e-06
chr1	227651673	227652173	*	5.48	6.34	3.09	3.25	4.51e-07	9.61e-06
chr15	66459082	66459582	*	4.44	5.38	0.79	4.59	4.52e-07	9.62e-06
chr2	3605517	3606017	*	5.23	6.11	2.63	3.47	4.53e-07	9.63e-06
chr8	144066913	144067413	*	6.33	7.18	4.04	3.13	4.54e-07	9.64e-06
chr17	42849211	42849711	*	4.15	5.12	-0.29	5.41	4.54e-07	9.64e-06
chr20	37274564	37275064	*	5.21	6.13	1.93	4.2	4.55e-07	9.66e-06
chr14	103234476	103234976	*	4.26	5.22	0.2	5.02	4.56e-07	9.66e-06
chr17	18901191	18901691	*	5.75	6.64	3.06	3.58	4.56e-07	9.66e-06
chr4	177241210	177241710	*	4.52	5.46	0.83	4.63	4.58e-07	9.69e-06
chr22	37139622	37140122	*	7.48	8.29	5.45	2.84	4.58e-07	9.69e-06
chr2	239200205	239200705	*	4.4	5.36	0.38	4.98	4.59e-07	9.69e-06
chr2	23907548	23908048	*	5.16	6.07	2.09	3.98	4.6e-07	9.71e-06
chr10	5877509	5878009	*	4.21	5.16	0.2	4.96	4.6e-07	9.72e-06
chr16	1508217	1508717	*	5.2	6.1	2.37	3.73	4.62e-07	9.74e-06
chr1	16421733	16422233	*	4.16	5.13	-0.29	5.42	4.64e-07	9.78e-06
chr18	77504040	77504540	*	4.94	5.84	2.01	3.84	4.64e-07	9.78e-06
chr22	35695244	35695744	*	6.79	7.63	4.53	3.09	4.66e-07	9.8e-06
chrX	152750376	152750876	*	4.85	5.78	1.45	4.33	4.66e-07	9.81e-06
chr18	74835659	74836159	*	4.71	5.65	1.1	4.54	4.67e-07	9.82e-06
chr1	17271982	17272482	*	4.23	5.19	-0.29	5.49	4.71e-07	9.89e-06
chr3	23852069	23852569	*	4.78	5.68	1.9	3.79	4.71e-07	9.89e-06
chr22	46384198	46384698	*	5.08	6.01	1.74	4.27	4.74e-07	9.93e-06
chr1	17855786	17856761	*	4.39	5.36	0.08	5.28	4.75e-07	9.94e-06
chr22	25678799	25679299	*	6.67	7.49	4.53	2.96	4.76e-07	9.96e-06
chr17	54671549	54672049	*	7.61	8.41	5.63	2.79	4.76e-07	9.97e-06
chr11	17582975	17583475	*	4.47	5.37	1.55	3.82	4.78e-07	9.99e-06
chr3	184074952	184075452	*	6.16	6.99	4.03	2.96	4.8e-07	1e-05
chr8	42119132	42119632	*	4.66	5.61	1.02	4.58	4.8e-07	1e-05
chr16	87144350	87144850	*	4.73	5.66	1.49	4.16	4.84e-07	1.01e-05
chr22	26430048	26430548	*	5.82	6.69	3.23	3.46	4.88e-07	1.02e-05
chr8	21980118	21980618	*	5.84	6.68	3.56	3.12	4.88e-07	1.02e-05
chr19	8397123	8397623	*	4.23	5.2	-0.29	5.49	4.89e-07	1.02e-05
chr9	137624465	137624965	*	4.35	5.32	-0.29	5.62	4.9e-07	1.02e-05
chr1	227167497	227167997	*	5.39	6.27	2.78	3.48	4.91e-07	1.02e-05
chr22	28403475	28403975	*	4.17	5.14	-0.29	5.43	4.93e-07	1.03e-05
chr16	88600966	88601466	*	5.45	6.33	2.74	3.59	4.96e-07	1.03e-05
chr3	50549899	50550399	*	4.33	5.3	-0.29	5.6	4.98e-07	1.03e-05
chr3	47618044	47618544	*	4.53	5.46	1.18	4.28	5.01e-07	1.04e-05
chr11	65585256	65585756	*	6.74	7.59	4.45	3.13	5.04e-07	1.04e-05
chr14	102884197	102884697	*	4.46	5.41	0.62	4.79	5.05e-07	1.05e-05
chr17	39915800	39916300	*	5.08	6.01	1.66	4.36	5.07e-07	1.05e-05
chr3	13460985	13461485	*	4.67	5.6	1.18	4.43	5.07e-07	1.05e-05
chr16	2337903	2338403	*	6.14	7	3.65	3.35	5.09e-07	1.05e-05
chr17	73030478	73030978	*	5.27	6.13	2.83	3.31	5.1e-07	1.05e-05
chr7	157577732	157578232	*	4.24	5.18	0.63	4.55	5.13e-07	1.06e-05
chr22	20113302	20113802	*	4.69	5.57	2	3.57	5.18e-07	1.07e-05
chr11	68139576	68140076	*	7.14	7.97	4.96	3.01	5.24e-07	1.08e-05
chr19	18507189	18507689	*	5.59	6.49	2.72	3.77	5.26e-07	1.08e-05
chr1	156390287	156390787	*	4.3	5.25	0.62	4.63	5.27e-07	1.08e-05
chr1	109817120	109817620	*	6.46	7.28	4.32	2.96	5.3e-07	1.09e-05
chr4	10092118	10092618	*	4.74	5.68	1.32	4.35	5.32e-07	1.09e-05
chr19	46995151	46995651	*	7.22	8.05	5.09	2.96	5.33e-07	1.09e-05
chr22	40654624	40655124	*	4.38	5.3	1.2	4.09	5.35e-07	1.1e-05
chr9	139757568	139758068	*	4.81	5.73	1.7	4.03	5.36e-07	1.1e-05
chr1	3278290	3278790	*	5.78	6.66	3.15	3.51	5.37e-07	1.1e-05
chr16	1053630	1054130	*	4.16	5.13	-0.29	5.42	5.41e-07	1.11e-05
chr7	75620952	75621452	*	4.29	5.25	0.2	5.05	5.42e-07	1.11e-05
chr22	20252143	20252643	*	8.25	9.07	6.19	2.88	5.43e-07	1.11e-05
chr2	97167512	97168012	*	7.24	8.1	4.81	3.3	5.43e-07	1.11e-05
chr8	143851044	143851544	*	5.35	6.22	2.78	3.43	5.45e-07	1.11e-05
chr20	31269663	31270163	*	6.63	7.52	3.78	3.74	5.46e-07	1.12e-05
chr19	54967826	54968326	*	4.97	5.88	1.96	3.92	5.5e-07	1.12e-05
chr11	44620506	44621006	*	4.45	5.38	1.08	4.3	5.53e-07	1.13e-05
chr22	20121501	20122001	*	4.77	5.68	1.69	4	5.54e-07	1.13e-05
chr21	27106746	27107246	*	4.53	5.47	1.01	4.45	5.55e-07	1.13e-05
chr8	142365248	142365748	*	6.1	7	3.22	3.78	5.55e-07	1.13e-05
chr22	30778897	30779397	*	8.32	9.14	6.21	2.93	5.56e-07	1.13e-05
chr4	2074050	2074550	*	5.44	6.37	2.14	4.22	5.59e-07	1.14e-05
chr1	1244762	1245262	*	4.99	5.9	1.99	3.91	5.61e-07	1.14e-05
chr7	155000721	155001221	*	4.19	5.16	-0.29	5.45	5.63e-07	1.14e-05
chr6	138482559	138483059	*	5.15	6.09	1.58	4.52	5.64e-07	1.14e-05
chr22	38130961	38131461	*	5.71	6.61	2.78	3.83	5.65e-07	1.15e-05
chr7	55220639	55221139	*	4.49	5.4	1.33	4.08	5.67e-07	1.15e-05
chr19	29218154	29218654	*	5.92	6.82	2.92	3.9	5.69e-07	1.15e-05
chr17	44992970	44993470	*	4.4	5.35	0.38	4.97	5.7e-07	1.15e-05
chr19	56047262	56047762	*	6.52	7.35	4.35	3	5.72e-07	1.16e-05
chr1	113347850	113348350	*	4.26	5.23	-0.29	5.52	5.73e-07	1.16e-05
chr2	219261668	219262168	*	5.21	6.09	2.54	3.55	5.74e-07	1.16e-05
chr12	96184571	96185071	*	7.15	7.98	4.97	3.01	5.75e-07	1.16e-05
chr11	68557751	68558251	*	5.51	6.42	2.39	4.03	5.75e-07	1.16e-05
chr1	3191841	3192341	*	5.53	6.41	2.82	3.59	5.76e-07	1.16e-05
chr7	98898932	98899432	*	6.16	7.03	3.65	3.38	5.76e-07	1.16e-05
chr16	15081951	15082451	*	5.14	6.03	2.41	3.62	5.77e-07	1.16e-05
chr14	70529472	70529972	*	4.77	5.7	1.45	4.24	5.78e-07	1.16e-05
chr16	19017508	19018008	*	6.09	6.94	3.68	3.26	5.79e-07	1.16e-05
chr7	1060226	1060726	*	4.13	5.1	-0.29	5.39	5.8e-07	1.16e-05
chr15	66902484	66902984	*	6.38	7.2	4.25	2.95	5.81e-07	1.17e-05
chr11	66126860	66127360	*	5.99	6.85	3.55	3.29	5.81e-07	1.17e-05
chr2	235278925	235279425	*	4.13	5.1	-0.29	5.39	5.84e-07	1.17e-05
chr12	12876490	12876990	*	4.59	5.5	1.58	3.92	5.84e-07	1.17e-05
chr5	118406690	118407190	*	5.09	5.98	2.24	3.74	5.87e-07	1.17e-05
chr2	95715388	95715888	*	4.9	5.84	1.19	4.66	5.87e-07	1.17e-05
chr22	50349262	50349762	*	7.77	8.6	5.55	3.05	5.9e-07	1.18e-05
chr1	883789	884289	*	5.84	6.7	3.47	3.23	5.9e-07	1.18e-05
chr9	140006206	140006706	*	6.48	7.34	4.05	3.29	5.91e-07	1.18e-05
chr1	19670368	19670868	*	5.49	6.36	2.97	3.39	5.92e-07	1.18e-05
chr20	62138786	62139286	*	7.66	8.52	5.24	3.28	5.93e-07	1.18e-05
chr3	14175774	14176274	*	5.97	6.81	3.73	3.08	5.97e-07	1.19e-05
chr8	8805868	8806368	*	6.33	7.16	4.15	3.01	5.98e-07	1.19e-05
chr19	48806768	48807268	*	4.23	5.2	-0.29	5.49	5.98e-07	1.19e-05
chr19	1325935	1326435	*	5.04	5.95	1.92	4.03	6e-07	1.19e-05
chr17	48190798	48191298	*	7.6	8.42	5.51	2.91	6.01e-07	1.19e-05
chr9	96270417	96270917	*	4.39	5.36	-0.29	5.65	6.08e-07	1.21e-05
chr14	105191137	105191637	*	4.93	5.84	1.87	3.97	6.08e-07	1.21e-05
chr16	12144640	12145140	*	4.99	5.91	1.82	4.09	6.1e-07	1.21e-05
chr7	99686127	99686627	*	4.08	5.05	-0.29	5.34	6.18e-07	1.22e-05
chr19	39906530	39907030	*	4.35	5.3	0.38	4.92	6.19e-07	1.23e-05
chr17	2611388	2611888	*	4.22	5.19	-0.29	5.48	6.2e-07	1.23e-05
chr20	61432978	61433478	*	5.04	5.95	2.06	3.89	6.21e-07	1.23e-05
chr22	24163256	24163756	*	7.26	8.1	5.01	3.09	6.24e-07	1.23e-05
chr1	2262695	2263195	*	6.17	7	4.07	2.93	6.25e-07	1.23e-05
chr11	75221075	75221575	*	5.43	6.34	2.47	3.86	6.27e-07	1.24e-05
chr20	3827694	3828194	*	5.22	6.14	2.04	4.1	6.27e-07	1.24e-05
chr17	80008546	80009046	*	7.23	8.07	4.99	3.08	6.29e-07	1.24e-05
chr17	37819199	37819699	*	5.48	6.35	2.9	3.45	6.29e-07	1.24e-05
chr1	150140951	150141451	*	4.19	5.15	0.08	5.07	6.32e-07	1.24e-05
chr10	81016272	81016772	*	5.1	6	2.14	3.86	6.32e-07	1.24e-05
chr12	110062737	110063237	*	5.74	6.63	2.91	3.72	6.38e-07	1.25e-05
chr4	2299384	2299884	*	5.06	5.97	2.12	3.84	6.39e-07	1.26e-05
chr20	756123	756623	*	4.15	5.12	-0.29	5.41	6.48e-07	1.27e-05
chr6	36806774	36807274	*	6.71	7.53	4.55	2.98	6.52e-07	1.28e-05
chr16	1276016	1276516	*	4.4	5.34	0.86	4.48	6.52e-07	1.28e-05
chr1	227729919	227730419	*	8.05	8.85	6.04	2.82	6.63e-07	1.3e-05
chr1	3393972	3394472	*	4.44	5.36	1.18	4.18	6.63e-07	1.3e-05
chr22	46466820	46467320	*	5.7	6.6	2.83	3.77	6.67e-07	1.3e-05
chr12	52565856	52566356	*	4.12	5.07	0.08	4.99	6.71e-07	1.31e-05
chr14	93580918	93581418	*	4.11	5.07	-0.29	5.36	6.73e-07	1.31e-05
chr2	231276158	231276658	*	4.14	5.1	-0.29	5.4	6.75e-07	1.32e-05
chr17	76246189	76246689	*	4.61	5.52	1.46	4.06	6.75e-07	1.32e-05
chr10	127584727	127585227	*	9.05	9.85	7.1	2.75	6.75e-07	1.32e-05
chr22	39770778	39771278	*	4.24	5.19	0.2	4.99	6.76e-07	1.32e-05
chr3	52570842	52571342	*	4.65	5.57	1.52	4.05	6.79e-07	1.32e-05
chr15	76603179	76603679	*	5.04	5.97	1.69	4.28	6.8e-07	1.32e-05
chr1	45982625	45983125	*	5.52	6.39	2.92	3.47	6.82e-07	1.33e-05
chr19	42818409	42818909	*	7.46	8.31	5.16	3.15	6.84e-07	1.33e-05
chr17	76931815	76932315	*	6.19	7.01	4.16	2.85	6.84e-07	1.33e-05
chr22	50012353	50012853	*	6.32	7.18	3.86	3.32	6.85e-07	1.33e-05
chr10	134903989	134904489	*	7.25	8.13	4.7	3.43	6.88e-07	1.33e-05
chr22	19882805	19883305	*	5.49	6.39	2.55	3.84	6.9e-07	1.34e-05
chr19	16667263	16667763	*	5.1	5.99	2.41	3.57	6.91e-07	1.34e-05
chr17	17686344	17686844	*	6.01	6.85	3.81	3.04	6.93e-07	1.34e-05
chr9	130697151	130697651	*	6.21	7.11	3.3	3.82	6.95e-07	1.35e-05
chr19	17826086	17826586	*	6.2	7.04	4.01	3.02	6.95e-07	1.35e-05
chr12	57943659	57944159	*	4.08	5.05	-0.29	5.34	6.99e-07	1.35e-05
chr21	46184586	46185086	*	5.24	6.15	2.18	3.97	7e-07	1.35e-05
chr5	132087668	132088168	*	4.68	5.59	1.61	3.97	7.02e-07	1.36e-05
chr19	45804704	45805532	*	4.72	5.62	1.69	3.93	7.04e-07	1.36e-05
chr9	130631531	130632031	*	7.49	8.32	5.32	3	7.06e-07	1.36e-05
chr17	75283773	75284273	*	4.37	5.31	0.83	4.48	7.07e-07	1.36e-05
chr3	46506509	46507009	*	5.68	6.57	2.92	3.65	7.09e-07	1.36e-05
chr15	66946947	66947447	*	4.06	5.01	0.2	4.81	7.13e-07	1.37e-05
chr11	77739727	77740227	*	4.44	5.37	1.1	4.26	7.15e-07	1.38e-05
chr16	86539729	86540229	*	5.22	6.09	2.68	3.41	7.16e-07	1.38e-05
chr7	100928520	100929020	*	5.23	6.11	2.58	3.53	7.16e-07	1.38e-05
chr18	13583707	13584207	*	7.48	8.31	5.3	3.01	7.17e-07	1.38e-05
chr5	32154789	32155289	*	4.71	5.63	1.45	4.18	7.17e-07	1.38e-05
chr1	201475901	201476401	*	6.19	7.09	3.26	3.83	7.19e-07	1.38e-05
chr13	115046674	115047174	*	4.17	5.13	-0.29	5.43	7.2e-07	1.38e-05
chr11	65183030	65183530	*	5.37	6.29	2.15	4.15	7.21e-07	1.38e-05
chr16	415807	416307	*	4.42	5.33	1.38	3.95	7.23e-07	1.38e-05
chr7	76000192	76000692	*	5.15	6.03	2.48	3.55	7.24e-07	1.38e-05
chr2	158484941	158485441	*	5.84	6.73	3.09	3.63	7.25e-07	1.39e-05
chr22	50835427	50835927	*	5.85	6.69	3.62	3.07	7.26e-07	1.39e-05
chr4	187112342	187112842	*	5.43	6.33	2.59	3.73	7.27e-07	1.39e-05
chr16	5057054	5057554	*	5.06	5.93	2.55	3.38	7.29e-07	1.39e-05
chr12	123480897	123481397	*	7.01	7.83	4.91	2.92	7.3e-07	1.39e-05
chr22	41970562	41971062	*	5.38	6.25	2.86	3.39	7.3e-07	1.39e-05
chr19	47714388	47714888	*	4.85	5.75	1.92	3.83	7.33e-07	1.4e-05
chr17	19289670	19290170	*	5.1	5.98	2.53	3.45	7.34e-07	1.4e-05
chr22	21349286	21349786	*	5.35	6.27	2.23	4.03	7.35e-07	1.4e-05
chr11	65355836	65356336	*	4.31	5.28	-0.29	5.57	7.38e-07	1.4e-05
chr17	73629209	73629709	*	4.7	5.63	1.32	4.31	7.39e-07	1.4e-05
chr19	17735157	17735657	*	6.04	6.89	3.7	3.19	7.41e-07	1.41e-05
chr17	44955720	44956220	*	4.34	5.28	0.62	4.66	7.41e-07	1.41e-05
chr6	169242886	169243386	*	6.24	7.13	3.41	3.72	7.49e-07	1.42e-05
chr11	100209572	100210072	*	5.49	6.39	2.61	3.78	7.54e-07	1.43e-05
chr22	50312428	50312928	*	4.43	5.36	1.01	4.35	7.55e-07	1.43e-05
chr10	71870859	71871359	*	5.19	6.09	2.41	3.68	7.57e-07	1.43e-05
chr13	114908153	114908653	*	4.55	5.47	1.33	4.15	7.59e-07	1.43e-05
chr7	56032372	56032872	*	8.42	9.25	6.29	2.96	7.59e-07	1.43e-05
chr3	47485039	47485539	*	5.34	6.25	2.31	3.94	7.59e-07	1.43e-05
chr11	72394923	72395423	*	5.38	6.27	2.66	3.61	7.6e-07	1.43e-05
chr21	45579946	45580446	*	7.78	8.59	5.75	2.85	7.62e-07	1.44e-05
chr1	142657805	142658305	*	6.91	7.73	4.84	2.88	7.65e-07	1.44e-05
chr1	32139475	32139975	*	6.72	7.58	4.26	3.32	7.71e-07	1.45e-05
chr17	42230617	42231117	*	5.24	6.16	1.98	4.19	7.72e-07	1.45e-05
chr8	144647967	144648467	*	5.99	6.88	3.27	3.6	7.72e-07	1.45e-05
chr19	3115613	3116113	*	4.11	5.06	0.38	4.67	7.72e-07	1.45e-05
chr2	95670004	95670504	*	6.65	7.46	4.63	2.83	7.75e-07	1.46e-05
chr9	139529680	139530180	*	4.04	4.99	0.2	4.79	7.75e-07	1.46e-05
chr8	143676555	143677055	*	5.81	6.72	2.78	3.94	7.75e-07	1.46e-05
chr19	47267586	47268086	*	4.65	5.56	1.55	4.01	7.76e-07	1.46e-05
chr17	19618425	19618925	*	7.51	8.33	5.45	2.88	7.76e-07	1.46e-05
chr20	46611619	46612119	*	5.07	5.97	2.19	3.79	7.77e-07	1.46e-05
chr1	40134563	40135063	*	6.02	6.88	3.59	3.29	7.79e-07	1.46e-05
chr9	35792666	35793166	*	5.41	6.31	2.57	3.74	7.82e-07	1.46e-05
chr3	49208612	49209112	*	5.97	6.8	3.81	2.99	7.83e-07	1.46e-05
chr7	1460971	1461471	*	6.31	7.15	3.99	3.16	7.84e-07	1.46e-05
chr1	33212687	33213187	*	4.37	5.3	1.08	4.22	7.87e-07	1.47e-05
chr1	155225749	155226249	*	4.18	5.12	0.48	4.64	7.94e-07	1.48e-05
chrX	67918785	67919285	*	4.01	4.96	0.08	4.88	7.95e-07	1.48e-05
chr15	90371577	90372077	*	6.3	7.12	4.18	2.94	7.96e-07	1.48e-05
chr19	38986644	38987144	*	5.52	6.36	3.3	3.05	7.99e-07	1.49e-05
chr20	32289599	32290099	*	5.5	6.35	3.09	3.26	8.04e-07	1.5e-05
chr12	130965436	130965936	*	7.06	7.92	4.68	3.24	8.11e-07	1.51e-05
chr1	65210784	65211284	*	4.73	5.66	1.46	4.2	8.17e-07	1.52e-05
chr12	10368667	10369167	*	4.36	5.3	0.71	4.59	8.18e-07	1.52e-05
chr12	751871	752371	*	4.49	5.41	1.18	4.23	8.22e-07	1.53e-05
chr11	64909567	64910067	*	4.17	5.14	-0.29	5.43	8.31e-07	1.54e-05
chr11	72421259	72421759	*	4.12	5.07	0.08	4.99	8.32e-07	1.54e-05
chr17	78084946	78085446	*	5.11	6.02	2.15	3.87	8.33e-07	1.54e-05
chr17	80227933	80228433	*	5.14	6.03	2.31	3.72	8.33e-07	1.54e-05
chr11	64972843	64973343	*	4.05	5.01	-0.29	5.31	8.35e-07	1.54e-05
chr1	25247902	25248402	*	6.34	7.2	3.88	3.33	8.41e-07	1.56e-05
chr11	60692127	60692627	*	7.5	8.33	5.29	3.04	8.43e-07	1.56e-05
chr11	2444976	2445476	*	4.94	5.8	2.53	3.26	8.44e-07	1.56e-05
chr7	1639590	1640090	*	5.44	6.3	2.96	3.34	8.48e-07	1.57e-05
chr19	1866321	1866821	*	4.09	5.06	-0.29	5.35	8.49e-07	1.57e-05
chr19	2434310	2434810	*	4.17	5.1	0.83	4.27	8.5e-07	1.57e-05
chr11	747397	747897	*	5	5.87	2.47	3.4	8.55e-07	1.58e-05
chr3	194799544	194800044	*	4.17	5.11	0.57	4.54	8.57e-07	1.58e-05
chr17	1493443	1493943	*	5.72	6.59	3.14	3.45	8.6e-07	1.58e-05
chr19	50406465	50406965	*	4.14	5.09	0.08	5.01	8.61e-07	1.58e-05
chr17	79951201	79951701	*	6.08	6.95	3.48	3.47	8.64e-07	1.59e-05
chr10	71616816	71617316	*	6.69	7.54	4.33	3.21	8.65e-07	1.59e-05
chr5	56260790	56261290	*	4.24	5.19	0.62	4.56	8.66e-07	1.59e-05
chr1	53392935	53393435	*	4.24	5.21	-0.29	5.5	8.68e-07	1.59e-05
chr22	20003510	20004010	*	6.37	7.21	4.16	3.05	8.68e-07	1.59e-05
chr2	114360766	114361266	*	5.03	5.93	2.19	3.74	8.69e-07	1.59e-05
chr22	38387507	38388007	*	4.96	5.82	2.48	3.34	8.7e-07	1.59e-05
chr22	41470806	41471306	*	5.07	5.96	2.23	3.73	8.7e-07	1.59e-05
chr7	535323	535823	*	4.14	5.08	0.38	4.71	8.75e-07	1.6e-05
chr11	76371956	76372456	*	7.24	8.07	5.11	2.96	8.78e-07	1.61e-05
chr11	46355490	46355990	*	4.6	5.51	1.5	4.01	8.79e-07	1.61e-05
chr17	39902434	39902934	*	4.99	5.85	2.53	3.32	8.82e-07	1.61e-05
chrX	153698515	153699015	*	5.55	6.45	2.59	3.87	8.85e-07	1.61e-05
chr18	11520876	11521376	*	7.18	8.01	5.04	2.97	8.85e-07	1.61e-05
chr19	35760122	35760622	*	5.48	6.33	3.15	3.18	8.88e-07	1.62e-05
chr17	79761802	79762302	*	6.09	6.93	3.82	3.11	8.88e-07	1.62e-05
chr19	6023830	6024330	*	4.23	5.16	0.98	4.18	8.91e-07	1.62e-05
chr4	3294397	3294897	*	5.86	6.74	3.24	3.5	8.92e-07	1.62e-05
chr14	69289362	69289862	*	5.95	6.83	3.26	3.57	8.92e-07	1.62e-05
chr16	1792165	1792665	*	5.62	6.5	2.98	3.52	8.94e-07	1.62e-05
chr14	91884401	91884901	*	4.25	5.2	0.38	4.82	9e-07	1.64e-05
chr1	17882032	17882532	*	4.47	5.38	1.43	3.94	9.01e-07	1.64e-05
chr21	46928677	46929177	*	6.34	7.21	3.83	3.38	9.06e-07	1.64e-05
chr15	85490045	85490545	*	7.12	7.95	4.95	3	9.08e-07	1.65e-05
chr16	8575124	8575624	*	4.19	5.12	0.62	4.5	9.11e-07	1.65e-05
chr7	89950023	89950523	*	7.41	8.22	5.43	2.79	9.11e-07	1.65e-05
chr16	2560198	2560698	*	4.23	5.2	-0.29	5.49	9.12e-07	1.65e-05
chr4	8616668	8617168	*	6.24	7.08	3.96	3.12	9.12e-07	1.65e-05
chr1	1469654	1470154	*	4.92	5.84	1.76	4.08	9.13e-07	1.65e-05
chr20	3650741	3651241	*	7.59	8.41	5.47	2.95	9.14e-07	1.65e-05
chr22	45016661	45017161	*	5.1	5.97	2.61	3.36	9.16e-07	1.65e-05
chr19	17541852	17542352	*	4.18	5.15	-0.29	5.44	9.18e-07	1.66e-05
chr12	131484444	131484944	*	4.38	5.31	1.02	4.29	9.19e-07	1.66e-05
chr14	105950344	105950844	*	6.95	7.78	4.7	3.08	9.19e-07	1.66e-05
chr22	24921221	24921721	*	4.6	5.56	0.2	5.36	9.23e-07	1.66e-05
chr12	6978722	6979222	*	4.53	5.44	1.35	4.09	9.29e-07	1.67e-05
chr1	1266702	1267202	*	6.32	7.13	4.33	2.8	9.3e-07	1.67e-05
chr1	46697636	46698136	*	4.4	5.34	0.84	4.5	9.32e-07	1.68e-05
chr8	144098520	144099020	*	4.14	5.11	-0.29	5.4	9.33e-07	1.68e-05
chr22	45338283	45338783	*	5.74	6.63	2.94	3.69	9.37e-07	1.68e-05
chr7	2357147	2357647	*	5.37	6.28	2.3	3.98	9.38e-07	1.68e-05
chr2	241947636	241948136	*	6.72	7.55	4.51	3.05	9.39e-07	1.68e-05
chr19	16369117	16369617	*	4.03	4.99	-0.29	5.28	9.42e-07	1.69e-05
chr7	2515302	2515802	*	5	5.87	2.53	3.34	9.45e-07	1.69e-05
chr20	62072700	62073200	*	5.07	5.98	2.1	3.87	9.5e-07	1.7e-05
chr12	115105114	115105614	*	5.7	6.55	3.38	3.17	9.51e-07	1.7e-05
chr20	35019089	35019589	*	6.34	7.19	4.02	3.18	9.54e-07	1.71e-05
chr16	67917884	67918384	*	4.23	5.19	-0.29	5.49	9.6e-07	1.72e-05
chr4	7457202	7457702	*	6.9	7.74	4.69	3.05	9.64e-07	1.72e-05
chr11	67396940	67397440	*	6.3	7.15	3.96	3.19	9.65e-07	1.72e-05
chr5	149730005	149730505	*	4.6	5.51	1.48	4.03	9.67e-07	1.73e-05
chr5	433024	433524	*	4.56	5.46	1.62	3.84	9.72e-07	1.73e-05
chr1	156146314	156146814	*	5.55	6.48	2.22	4.26	9.72e-07	1.73e-05
chr12	96183287	96183787	*	5.83	6.66	3.61	3.05	9.74e-07	1.73e-05
chr15	29420005	29420505	*	5.97	6.87	3.12	3.75	9.77e-07	1.74e-05
chr17	18923107	18923607	*	7.25	8.1	4.88	3.23	9.79e-07	1.74e-05
chr19	36044002	36044502	*	6.9	7.75	4.56	3.19	9.85e-07	1.75e-05
chr11	62380387	62380887	*	4.18	5.14	0.08	5.05	9.86e-07	1.75e-05
chr14	62259766	62260266	*	4.11	5.06	0.2	4.86	9.88e-07	1.75e-05
chr16	892525	893025	*	6.77	7.63	4.35	3.28	9.89e-07	1.76e-05
chr19	42433401	42433901	*	4.22	5.15	0.62	4.53	9.95e-07	1.76e-05
chr2	74751160	74751660	*	5.37	6.27	2.5	3.77	9.97e-07	1.77e-05
chr1	33361024	33361524	*	4.97	5.89	1.81	4.08	1.01e-06	1.78e-05
chr6	160242922	160243422	*	5.78	6.65	3.17	3.48	1.01e-06	1.78e-05
chr22	31277731	31278231	*	4.59	5.53	1.01	4.52	1.01e-06	1.79e-05
chr14	105269762	105270262	*	4.32	5.29	-0.29	5.58	1.01e-06	1.79e-05
chr17	75421792	75422292	*	4.33	5.25	1.01	4.24	1.02e-06	1.8e-05
chr8	23022271	23022771	*	4.7	5.61	1.59	4.03	1.02e-06	1.8e-05
chr17	78306073	78306573	*	4.05	5.01	-0.29	5.3	1.02e-06	1.8e-05
chr1	16825175	16825675	*	6.48	7.38	3.55	3.83	1.03e-06	1.82e-05
chr22	29450166	29450666	*	4.92	5.82	1.98	3.84	1.04e-06	1.83e-05
chr19	56048203	56048703	*	7.41	8.26	5.08	3.18	1.04e-06	1.84e-05
chr8	145640067	145640567	*	4	4.96	-0.29	5.26	1.04e-06	1.84e-05
chr3	195608750	195609250	*	5.11	6.02	2.2	3.82	1.04e-06	1.84e-05
chr1	1222828	1223328	*	5.41	6.32	2.41	3.91	1.05e-06	1.86e-05
chr17	79791463	79791963	*	7.56	8.4	5.31	3.09	1.06e-06	1.86e-05
chr19	50542220	50542720	*	4.18	5.13	0.38	4.76	1.06e-06	1.86e-05
chr9	138577115	138577615	*	7.16	7.94	5.28	2.67	1.06e-06	1.86e-05
chr10	104920405	104920905	*	5.34	6.19	2.93	3.26	1.06e-06	1.87e-05
chr15	74594905	74595405	*	5.68	6.52	3.48	3.04	1.07e-06	1.87e-05
chr7	97843375	97843875	*	7.67	8.53	5.24	3.28	1.07e-06	1.88e-05
chr22	18961116	18961616	*	4.55	5.45	1.59	3.86	1.07e-06	1.88e-05
chr19	2636200	2636700	*	4.2	5.15	0.38	4.76	1.07e-06	1.88e-05
chr22	35936062	35936562	*	4.19	5.16	-0.29	5.45	1.08e-06	1.89e-05
chr3	50164596	50165096	*	5.53	6.44	2.53	3.9	1.09e-06	1.9e-05
chr22	38173890	38174390	*	4.17	5.12	0.08	5.04	1.09e-06	1.91e-05
chr1	28928515	28929015	*	4.06	5.03	-0.29	5.32	1.09e-06	1.91e-05
chr22	50300676	50301176	*	5.77	6.66	2.95	3.71	1.1e-06	1.91e-05
chr7	98393989	98394489	*	4.05	5.02	-0.29	5.31	1.1e-06	1.92e-05
chr10	13313573	13314073	*	4.51	5.46	0.62	4.84	1.1e-06	1.92e-05
chr11	120823146	120823646	*	4.07	5.03	-0.29	5.33	1.1e-06	1.93e-05
chr11	64305983	64306483	*	4.74	5.66	1.49	4.17	1.11e-06	1.93e-05
chr9	139222514	139223014	*	5.12	6.02	2.23	3.79	1.11e-06	1.93e-05
chr22	51116471	51116971	*	4.85	5.76	1.68	4.08	1.11e-06	1.93e-05
chr10	134265651	134266151	*	4.01	4.97	-0.29	5.26	1.11e-06	1.93e-05
chr15	57887589	57888089	*	6.33	7.15	4.23	2.92	1.11e-06	1.93e-05
chr17	234751	235251	*	4.05	4.99	0.38	4.61	1.11e-06	1.93e-05
chr11	67076533	67077033	*	4.68	5.61	1.31	4.3	1.12e-06	1.95e-05
chr17	46908521	46909021	*	4.43	5.32	1.67	3.65	1.12e-06	1.95e-05
chr20	31869827	31870327	*	6.28	7.09	4.25	2.84	1.12e-06	1.95e-05
chr22	30782214	30782714	*	4.34	5.26	1.01	4.25	1.13e-06	1.95e-05
chr7	104624429	104624929	*	4.72	5.65	1.33	4.31	1.13e-06	1.95e-05
chr17	61774147	61774647	*	5.24	6.1	2.78	3.32	1.13e-06	1.95e-05
chr1	17556046	17556546	*	4.36	5.28	1.18	4.1	1.13e-06	1.95e-05
chr19	11511436	11511936	*	5.75	6.59	3.55	3.04	1.13e-06	1.96e-05
chr1	7024086	7024586	*	5.89	6.72	3.67	3.05	1.13e-06	1.96e-05
chr3	64587600	64588100	*	4.59	5.51	1.46	4.05	1.14e-06	1.97e-05
chr1	6656716	6657216	*	4.8	5.71	1.69	4.02	1.14e-06	1.97e-05
chr22	37897901	37898401	*	5.88	6.75	3.3	3.45	1.14e-06	1.97e-05
chr16	3115692	3116192	*	5.49	6.41	2.22	4.19	1.15e-06	1.98e-05
chr9	129461360	129461860	*	4.74	5.66	1.57	4.09	1.16e-06	1.99e-05
chr1	180213842	180214342	*	6.33	7.15	4.27	2.88	1.16e-06	1.99e-05
chr22	30761928	30762428	*	5.55	6.4	3.27	3.13	1.16e-06	1.99e-05
chr8	143553072	143553572	*	4.22	5.19	-0.29	5.48	1.16e-06	2e-05
chr11	133853769	133854269	*	4.46	5.39	1.18	4.21	1.16e-06	2e-05
chr10	79224216	79224716	*	4.45	5.36	1.38	3.98	1.16e-06	2e-05
chr7	5632430	5632930	*	7.44	8.26	5.32	2.94	1.17e-06	2e-05
chr2	209130539	209131039	*	4.08	5.04	-0.29	5.33	1.17e-06	2e-05
chr11	57309483	57309983	*	5.35	6.25	2.44	3.8	1.17e-06	2.01e-05
chr17	25684195	25684695	*	5.89	6.7	3.85	2.86	1.17e-06	2.01e-05
chr17	40281134	40281634	*	4.93	5.82	2.2	3.62	1.17e-06	2.01e-05
chr10	12119238	12119738	*	4.4	5.34	0.86	4.48	1.18e-06	2.03e-05
chr19	30555667	30556167	*	7.45	8.27	5.35	2.92	1.19e-06	2.04e-05
chr20	35974037	35974537	*	4.2	5.17	-0.29	5.46	1.19e-06	2.04e-05
chr3	126471242	126471742	*	5.39	6.25	2.95	3.31	1.2e-06	2.05e-05
chr9	139748065	139748565	*	6	6.83	3.79	3.04	1.2e-06	2.05e-05
chr17	29876208	29876708	*	7.68	8.5	5.55	2.95	1.2e-06	2.05e-05
chr6	34090500	34091000	*	6.4	7.24	4.17	3.07	1.2e-06	2.06e-05
chr15	70274877	70275377	*	5.77	6.67	2.87	3.8	1.21e-06	2.06e-05
chr9	130493035	130493535	*	7.51	8.34	5.34	3	1.21e-06	2.06e-05
chrX	153640067	153640567	*	6.38	7.21	4.21	3	1.21e-06	2.06e-05
chr9	139746314	139746814	*	6.49	7.32	4.33	2.99	1.21e-06	2.07e-05
chr20	62420649	62421149	*	4.66	5.58	1.45	4.13	1.22e-06	2.07e-05
chr22	41725687	41726187	*	4.01	4.96	0.08	4.88	1.22e-06	2.07e-05
chr14	93568200	93568700	*	5.55	6.38	3.42	2.96	1.22e-06	2.07e-05
chr20	34707438	34707938	*	5.09	6	2.1	3.9	1.23e-06	2.08e-05
chr15	64724497	64724997	*	6.23	7.05	4.08	2.98	1.23e-06	2.09e-05
chr8	143688982	143689482	*	4.31	5.24	1.01	4.23	1.23e-06	2.09e-05
chr19	50128593	50129093	*	3.99	4.96	-0.29	5.25	1.23e-06	2.09e-05
chr19	7998077	7998577	*	4.88	5.78	1.99	3.79	1.25e-06	2.11e-05
chr12	52284186	52284686	*	5.46	6.32	3.05	3.27	1.25e-06	2.12e-05
chr2	2166081	2166581	*	4.6	5.48	1.97	3.5	1.25e-06	2.12e-05
chr7	1521150	1521650	*	5.44	6.35	2.25	4.1	1.25e-06	2.12e-05
chr8	143300683	143301183	*	5.11	5.99	2.47	3.53	1.25e-06	2.12e-05
chr22	39156535	39157035	*	3.95	4.91	-0.29	5.2	1.26e-06	2.13e-05
chr15	75485039	75485539	*	5.27	6.18	2.14	4.04	1.26e-06	2.13e-05
chr16	31151568	31152068	*	4.95	5.86	1.92	3.93	1.27e-06	2.14e-05
chr17	36849151	36849651	*	6.88	7.71	4.72	2.99	1.27e-06	2.14e-05
chr2	239049835	239050335	*	5.8	6.64	3.54	3.11	1.27e-06	2.15e-05
chr2	241795051	241795551	*	4.27	5.18	1.18	4	1.28e-06	2.15e-05
chr11	57070899	57071399	*	4.03	5	-0.29	5.29	1.28e-06	2.15e-05
chr11	64110655	64111155	*	4.26	5.23	-0.29	5.52	1.28e-06	2.15e-05
chr19	19110284	19110784	*	7.96	8.75	6.01	2.74	1.28e-06	2.16e-05
chr14	104658510	104659010	*	5.03	5.9	2.49	3.41	1.29e-06	2.16e-05
chr14	105178157	105178657	*	4.11	5.07	-0.29	5.36	1.29e-06	2.17e-05
chr16	66640782	66641282	*	6.4	7.25	4.06	3.19	1.3e-06	2.18e-05
chr1	43774919	43775419	*	5.72	6.61	3	3.61	1.3e-06	2.18e-05
chr10	71623133	71623633	*	4.1	5.05	0.08	4.97	1.3e-06	2.18e-05
chr11	34184372	34184872	*	4.16	5.09	0.86	4.23	1.3e-06	2.18e-05
chr2	10503901	10504401	*	6.33	7.15	4.25	2.9	1.3e-06	2.19e-05
chr3	45133931	45134431	*	4.14	5.08	0.57	4.51	1.31e-06	2.19e-05
chr10	134858180	134858680	*	6.41	7.24	4.25	2.99	1.31e-06	2.19e-05
chr20	39597517	39598017	*	4.36	5.3	0.62	4.68	1.31e-06	2.19e-05
chr9	22154254	22154754	*	4.14	5.07	0.62	4.45	1.32e-06	2.21e-05
chr19	55969336	55969836	*	4.06	5	0.38	4.62	1.32e-06	2.21e-05
chr22	19714684	19715184	*	5.03	5.89	2.59	3.3	1.32e-06	2.21e-05
chr7	1424651	1425151	*	5.66	6.57	2.63	3.94	1.32e-06	2.21e-05
chr1	1134667	1135167	*	6.27	7.12	4.01	3.11	1.32e-06	2.21e-05
chr22	20144007	20144507	*	4.96	5.84	2.32	3.53	1.34e-06	2.23e-05
chr10	126804224	126804724	*	4.24	5.18	0.62	4.56	1.34e-06	2.23e-05
chr22	40077538	40078038	*	7.39	8.2	5.43	2.77	1.34e-06	2.23e-05
chr3	127872415	127872915	*	4.64	5.55	1.61	3.94	1.34e-06	2.23e-05
chr2	2239721	2240221	*	5.7	6.54	3.39	3.15	1.34e-06	2.23e-05
chr19	7795142	7795642	*	5.96	6.81	3.61	3.2	1.34e-06	2.23e-05
chr18	74897732	74898232	*	5.81	6.66	3.53	3.13	1.34e-06	2.23e-05
chr12	6346643	6347143	*	4.52	5.45	1.1	4.35	1.35e-06	2.25e-05
chr2	133034661	133035161	*	7.57	8.55	2.51	6.04	1.36e-06	2.25e-05
chr11	61816997	61817497	*	5.51	6.35	3.2	3.16	1.36e-06	2.26e-05
chr17	48921501	48922001	*	5.84	6.68	3.6	3.08	1.36e-06	2.26e-05
chr20	61866629	61867129	*	7.11	7.93	4.99	2.94	1.37e-06	2.26e-05
chr11	60612499	60612999	*	4.04	5	-0.29	5.29	1.37e-06	2.27e-05
chr11	45928045	45928545	*	5.22	6.12	2.3	3.82	1.37e-06	2.27e-05
chr11	118801842	118802342	*	4	4.97	-0.29	5.26	1.37e-06	2.27e-05
chr10	22872604	22873104	*	4.06	5.02	-0.29	5.31	1.37e-06	2.27e-05
chr10	134273435	134273935	*	4.79	5.72	1.45	4.26	1.38e-06	2.28e-05
chr7	73855862	73856362	*	4.05	5	0.2	4.79	1.38e-06	2.28e-05
chr16	30531539	30532039	*	4.08	5.05	-0.29	5.34	1.38e-06	2.28e-05
chr9	95876505	95877005	*	5.64	6.52	2.93	3.59	1.4e-06	2.31e-05
chr1	228547881	228548381	*	4.75	5.65	1.91	3.74	1.4e-06	2.31e-05
chr14	69951533	69952033	*	4.58	5.48	1.59	3.9	1.41e-06	2.32e-05
chr7	107000185	107000685	*	5.44	6.28	3.2	3.08	1.41e-06	2.32e-05
chr2	1512967	1513467	*	7.73	8.55	5.67	2.88	1.41e-06	2.32e-05
chr19	7853724	7854224	*	3.99	4.95	-0.29	5.24	1.42e-06	2.33e-05
chr15	78065787	78066287	*	5.27	6.18	2.24	3.94	1.42e-06	2.34e-05
chr20	62610214	62610714	*	6.96	7.8	4.71	3.09	1.42e-06	2.34e-05
chr9	100880952	100881452	*	5.05	5.92	2.61	3.31	1.43e-06	2.34e-05
chr19	1907661	1908161	*	7.27	8.08	5.2	2.88	1.43e-06	2.34e-05
chr20	2674064	2674564	*	5.45	6.3	3.14	3.16	1.43e-06	2.34e-05
chr20	61403613	61404113	*	6.84	7.67	4.67	3	1.43e-06	2.34e-05
chr11	116684515	116685015	*	5.7	6.53	3.52	3.02	1.43e-06	2.34e-05
chr20	400406	400906	*	7.02	7.88	4.64	3.24	1.44e-06	2.36e-05
chr11	1263332	1263832	*	5.73	6.57	3.49	3.08	1.44e-06	2.36e-05
chr11	70066019	70066519	*	5.18	6.03	2.84	3.19	1.44e-06	2.36e-05
chr1	38416052	38416552	*	4.81	5.66	2.45	3.21	1.45e-06	2.37e-05
chr2	10968930	10969430	*	5.78	6.65	3.3	3.35	1.45e-06	2.37e-05
chr15	27786728	27787228	*	5.35	6.25	2.42	3.83	1.46e-06	2.38e-05
chr11	73365855	73366355	*	7.17	8	5.01	2.99	1.46e-06	2.38e-05
chr16	57608554	57609054	*	4.98	5.86	2.36	3.5	1.47e-06	2.39e-05
chr15	100289952	100290452	*	6.29	7.13	4.08	3.05	1.47e-06	2.39e-05
chr19	5021040	5021540	*	4	4.97	-0.29	5.26	1.47e-06	2.39e-05
chr1	41270465	41270965	*	4.04	5	-0.29	5.29	1.48e-06	2.41e-05
chr19	47620707	47621207	*	5.27	6.16	2.58	3.57	1.48e-06	2.41e-05
chr19	4351343	4351843	*	4.47	5.44	-0.29	5.73	1.48e-06	2.41e-05
chr11	71127517	71128017	*	5.73	6.58	3.47	3.1	1.48e-06	2.41e-05
chr10	100227786	100228286	*	6.15	6.98	4.03	2.95	1.48e-06	2.41e-05
chr6	39901816	39902316	*	6.27	7.16	3.51	3.65	1.48e-06	2.41e-05
chr10	71933652	71934152	*	6	6.84	3.79	3.04	1.49e-06	2.41e-05
chr19	46997868	46998368	*	4.19	5.16	-0.29	5.45	1.49e-06	2.42e-05
chr7	100659036	100659536	*	5.8	6.62	3.75	2.87	1.49e-06	2.42e-05
chr11	43386403	43386903	*	5.85	6.68	3.71	2.97	1.51e-06	2.44e-05
chr17	19895166	19895666	*	5.1	5.95	2.71	3.24	1.51e-06	2.45e-05
chr19	49596057	49596557	*	4.29	5.23	0.63	4.6	1.52e-06	2.47e-05
chr16	1087588	1088088	*	5.9	6.74	3.61	3.13	1.52e-06	2.47e-05
chr17	75282189	75282689	*	5.12	5.99	2.61	3.38	1.53e-06	2.47e-05
chr22	28402582	28403082	*	5.55	6.47	2.34	4.13	1.53e-06	2.47e-05
chr7	44420669	44421169	*	4.48	5.37	1.77	3.59	1.53e-06	2.48e-05
chr19	8375750	8376250	*	3.98	4.93	0.08	4.85	1.54e-06	2.48e-05
chr11	61501260	61501760	*	4.84	5.76	1.76	3.99	1.54e-06	2.49e-05
chr5	131550185	131550685	*	4.13	5.05	0.98	4.07	1.55e-06	2.5e-05
chr1	9116493	9116993	*	4.13	5.05	0.97	4.08	1.56e-06	2.51e-05
chr19	51688662	51689162	*	5.85	6.75	3.05	3.7	1.56e-06	2.51e-05
chr19	38811276	38811776	*	3.99	4.95	-0.29	5.25	1.56e-06	2.51e-05
chr1	3099498	3099998	*	4.03	4.98	0.08	4.9	1.56e-06	2.51e-05
chr2	27272826	27273326	*	4.28	5.25	-0.29	5.54	1.56e-06	2.52e-05
chr11	60850412	60850912	*	5.15	6.04	2.37	3.67	1.57e-06	2.53e-05
chr1	22221339	22221839	*	5.26	6.13	2.74	3.39	1.58e-06	2.54e-05
chr1	26616773	26617273	*	4	4.97	-0.29	5.26	1.58e-06	2.54e-05
chr2	109736669	109737169	*	5.75	6.62	3.24	3.37	1.58e-06	2.55e-05
chr22	39664826	39665326	*	3.92	4.88	-0.29	5.17	1.59e-06	2.56e-05
chr1	9098276	9098776	*	4.77	5.69	1.66	4.03	1.6e-06	2.57e-05
chr15	42372992	42373492	*	4.86	5.81	1.02	4.79	1.61e-06	2.57e-05
chr19	51512364	51512864	*	6.19	7.05	3.79	3.26	1.61e-06	2.57e-05
chr17	79480354	79480854	*	6.41	7.25	4.16	3.09	1.61e-06	2.58e-05
chr1	41115646	41116146	*	6.98	7.8	4.84	2.97	1.61e-06	2.58e-05
chr3	13192824	13193324	*	5.29	6.18	2.48	3.7	1.61e-06	2.58e-05
chr8	142071016	142071516	*	3.96	4.92	-0.29	5.21	1.62e-06	2.58e-05
chr16	75256089	75256589	*	4.38	5.3	1.18	4.13	1.62e-06	2.59e-05
chr7	101341921	101342421	*	7.5	8.31	5.48	2.83	1.63e-06	2.6e-05
chr20	61583711	61584211	*	8.41	9.18	6.59	2.6	1.63e-06	2.61e-05
chr18	19215587	19216087	*	4.77	5.64	2.13	3.51	1.64e-06	2.61e-05
chr19	2298695	2299195	*	5.41	6.3	2.64	3.66	1.64e-06	2.61e-05
chr16	70695914	70696414	*	5.74	6.61	3.13	3.48	1.64e-06	2.61e-05
chrX	48471977	48472477	*	4.4	5.34	0.86	4.48	1.65e-06	2.63e-05
chr22	39883279	39883779	*	5.44	6.32	2.83	3.49	1.65e-06	2.64e-05
chr8	144343336	144343836	*	5.3	6.13	3.15	2.97	1.66e-06	2.64e-05
chr17	76968951	76969451	*	6.46	7.26	4.47	2.79	1.66e-06	2.64e-05
chr21	32930253	32930753	*	5.83	6.66	3.62	3.04	1.67e-06	2.65e-05
chr19	1868095	1868595	*	6.48	7.32	4.21	3.11	1.67e-06	2.66e-05
chr8	143708955	143709455	*	4.27	5.23	0.08	5.15	1.67e-06	2.66e-05
chr2	103235669	103236169	*	7.21	8.02	5.15	2.87	1.68e-06	2.66e-05
chr6	43880189	43880689	*	6.23	7.02	4.32	2.71	1.68e-06	2.66e-05
chr22	48776992	48777492	*	4.62	5.55	1.32	4.22	1.69e-06	2.68e-05
chr1	17594070	17594570	*	6.3	7.12	4.26	2.86	1.7e-06	2.69e-05
chr8	118240436	118240936	*	5.77	6.59	3.68	2.91	1.7e-06	2.7e-05
chrX	10124571	10125071	*	4.82	5.72	1.92	3.8	1.71e-06	2.71e-05
chr22	25960959	25961459	*	5.33	6.23	2.37	3.85	1.71e-06	2.71e-05
chr15	77908085	77908585	*	4.33	5.24	1.18	4.06	1.71e-06	2.71e-05
chr15	42168941	42169441	*	5.16	6.04	2.53	3.5	1.71e-06	2.71e-05
chr2	74588368	74588868	*	5.21	6.12	2.06	4.06	1.72e-06	2.72e-05
chr9	139755371	139755871	*	7.89	8.68	6	2.68	1.73e-06	2.73e-05
chr22	22646323	22646823	*	9.2	9.95	7.5	2.46	1.73e-06	2.74e-05
chr22	38377604	38378104	*	3.95	4.91	-0.29	5.2	1.74e-06	2.74e-05
chr2	29204032	29204532	*	4.72	5.59	2.22	3.37	1.74e-06	2.75e-05
chr14	105434200	105434700	*	5.48	6.37	2.68	3.7	1.75e-06	2.75e-05
chr15	85491182	85491682	*	6.41	7.3	3.64	3.66	1.75e-06	2.75e-05
chr9	94952096	94952596	*	4.93	5.81	2.28	3.53	1.75e-06	2.76e-05
chr11	46363604	46364104	*	4.81	5.73	1.62	4.11	1.77e-06	2.78e-05
chr11	65351341	65351841	*	4.08	5.01	0.71	4.3	1.77e-06	2.78e-05
chr22	46298396	46298896	*	4.23	5.18	0.2	4.98	1.77e-06	2.79e-05
chr12	9621510	9622010	*	5.07	5.92	2.8	3.11	1.78e-06	2.8e-05
chr3	48605588	48606088	*	5.86	6.71	3.58	3.13	1.79e-06	2.8e-05
chr7	98917214	98917714	*	4.34	5.25	1.18	4.07	1.79e-06	2.81e-05
chr10	105691221	105691721	*	5.39	6.23	3.1	3.13	1.79e-06	2.81e-05
chr2	242734336	242734836	*	4.95	5.82	2.43	3.39	1.8e-06	2.82e-05
chr22	20175192	20175692	*	4.58	5.49	1.45	4.04	1.8e-06	2.82e-05
chr22	25798588	25799088	*	5.55	6.4	3.2	3.21	1.8e-06	2.82e-05
chr20	60463607	60464107	*	4.59	5.51	1.45	4.06	1.81e-06	2.84e-05
chr3	50255014	50255514	*	4.24	5.18	0.62	4.56	1.82e-06	2.85e-05
chr7	100079961	100080461	*	5.11	6.03	1.89	4.15	1.82e-06	2.85e-05
chr8	144423630	144424130	*	6.79	7.6	4.8	2.8	1.83e-06	2.85e-05
chr1	209801199	209801699	*	4.38	5.3	1.31	3.98	1.83e-06	2.86e-05
chr1	44478254	44478754	*	4.78	5.7	1.66	4.04	1.83e-06	2.86e-05
chr12	125464531	125465031	*	4.66	5.58	1.49	4.08	1.84e-06	2.87e-05
chr19	9159532	9160032	*	4.06	4.98	0.79	4.2	1.84e-06	2.87e-05
chr17	79098482	79098982	*	6.24	7.12	3.6	3.52	1.84e-06	2.87e-05
chr21	46495148	46495648	*	4.38	5.31	0.83	4.48	1.84e-06	2.87e-05
chr8	142294070	142294570	*	5.39	6.24	3.07	3.17	1.85e-06	2.88e-05
chr10	73201965	73202465	*	4.46	5.38	1.1	4.28	1.86e-06	2.89e-05
chr11	68082423	68082923	*	4.39	5.3	1.29	4	1.87e-06	2.9e-05
chr7	44319667	44320167	*	4.06	5.03	-0.29	5.32	1.87e-06	2.9e-05
chr8	47151337	47151837	*	4.2	5.14	0.57	4.57	1.87e-06	2.9e-05
chr13	113772312	113772812	*	5.76	6.68	2.69	3.99	1.88e-06	2.91e-05
chr15	90754365	90754865	*	6.83	7.66	4.7	2.96	1.88e-06	2.92e-05
chr1	40781991	40782491	*	5.23	6.11	2.63	3.48	1.88e-06	2.92e-05
chr19	10083619	10084119	*	6.51	7.33	4.44	2.89	1.88e-06	2.92e-05
chr13	114885955	114886455	*	4.72	5.61	1.89	3.72	1.89e-06	2.92e-05
chr17	77704680	77705180	*	6.09	6.94	3.79	3.15	1.89e-06	2.92e-05
chr22	20005079	20005579	*	4.74	5.66	1.58	4.08	1.89e-06	2.93e-05
chr14	105045381	105045881	*	7.15	7.97	4.99	2.98	1.9e-06	2.94e-05
chr3	118753370	118753870	*	4.73	5.65	1.49	4.16	1.9e-06	2.94e-05
chr2	23815007	23815507	*	6.54	7.35	4.46	2.89	1.91e-06	2.96e-05
chr19	51960551	51961051	*	3.98	4.94	-0.29	5.24	1.91e-06	2.96e-05
chr7	33934822	33935322	*	5.18	6.05	2.62	3.44	1.92e-06	2.97e-05
chrX	153719062	153719562	*	6.91	7.73	4.77	2.96	1.92e-06	2.97e-05
chr20	31598531	31599031	*	4.6	5.47	2.08	3.38	1.94e-06	2.99e-05
chr5	55919717	55920217	*	4.09	5.04	0.08	4.96	1.94e-06	2.99e-05
chr12	132870992	132871492	*	6.44	7.26	4.37	2.9	1.94e-06	2.99e-05
chr17	54673100	54673600	*	4.76	5.67	1.85	3.81	1.94e-06	2.99e-05
chr18	13223504	13224004	*	4.04	4.97	0.63	4.34	1.95e-06	3e-05
chr12	126044613	126045113	*	4.92	5.83	1.8	4.03	1.95e-06	3e-05
chr3	13673875	13674375	*	4.08	5.04	-0.29	5.33	1.95e-06	3e-05
chr5	126444483	126444983	*	4.29	5.19	1.48	3.71	1.95e-06	3.01e-05
chr8	142370233	142370733	*	4.25	5.2	0.62	4.57	1.96e-06	3.01e-05
chr9	127554407	127554907	*	5.92	6.73	3.86	2.87	1.96e-06	3.01e-05
chr8	143679248	143679748	*	6.85	7.68	4.67	3.01	1.96e-06	3.01e-05
chr1	26856238	26856738	*	4.14	5.1	-0.29	5.39	1.96e-06	3.01e-05
chr1	227978899	227979399	*	8.6	9.41	6.59	2.83	1.96e-06	3.01e-05
chr5	123640232	123640732	*	3.95	4.9	0.08	4.82	1.96e-06	3.01e-05
chr1	44065946	44066446	*	4.27	5.22	0.38	4.84	1.96e-06	3.01e-05
chr3	52398834	52399334	*	4.98	5.87	2.26	3.61	1.97e-06	3.01e-05
chr6	169632682	169633182	*	6.54	7.37	4.42	2.94	1.97e-06	3.01e-05
chr14	104683810	104684310	*	4.1	5.07	-0.29	5.36	1.99e-06	3.04e-05
chr22	17671042	17671542	*	5.55	6.41	3.17	3.23	1.99e-06	3.04e-05
chr17	36584656	36585156	*	6.75	7.54	4.8	2.74	1.99e-06	3.04e-05
chr6	6740620	6741120	*	4.13	5.1	-0.29	5.39	2e-06	3.05e-05
chr3	128445260	128445760	*	5.58	6.46	2.94	3.51	2e-06	3.05e-05
chr2	45160541	45161041	*	6.63	7.45	4.54	2.92	2e-06	3.05e-05
chr15	52624697	52625197	*	5.41	6.26	3.06	3.2	2e-06	3.05e-05
chr7	4168015	4168515	*	3.91	4.87	-0.29	5.16	2e-06	3.06e-05
chr1	16360658	16361158	*	5.03	5.87	2.77	3.1	2.01e-06	3.06e-05
chr7	150660260	150660760	*	5.44	6.25	3.35	2.91	2.01e-06	3.06e-05
chr12	109005818	109006318	*	4.33	5.24	1.32	3.92	2.01e-06	3.06e-05
chr19	6230233	6230733	*	5.24	6.12	2.56	3.56	2.02e-06	3.07e-05
chr19	3124005	3124505	*	5.35	6.24	2.58	3.66	2.02e-06	3.08e-05
chr16	2245489	2245989	*	4.74	5.63	2.04	3.59	2.04e-06	3.1e-05
chr6	143862993	143863493	*	4.69	5.59	1.8	3.79	2.05e-06	3.11e-05
chr6	33247850	33248350	*	6.54	7.38	4.3	3.08	2.05e-06	3.12e-05
chr20	957754	958254	*	6.49	7.33	4.24	3.09	2.05e-06	3.12e-05
chr12	8032417	8032917	*	6.01	6.91	3.15	3.76	2.06e-06	3.13e-05
chr6	166274087	166274587	*	4.01	4.95	0.48	4.47	2.06e-06	3.13e-05
chr10	70782380	70782880	*	7.53	8.36	5.31	3.06	2.07e-06	3.13e-05
chrX	48534836	48535336	*	4.02	4.99	-0.29	5.28	2.07e-06	3.13e-05
chr19	45311086	45311586	*	6.01	6.84	3.77	3.07	2.07e-06	3.13e-05
chr9	136026438	136026938	*	4.69	5.67	-0.29	5.96	2.07e-06	3.13e-05
chr18	76437605	76438105	*	3.97	4.93	-0.29	5.22	2.07e-06	3.14e-05
chr18	3266181	3266681	*	4.42	5.34	1.2	4.14	2.08e-06	3.14e-05
chr8	144802167	144802667	*	7.74	8.56	5.64	2.92	2.08e-06	3.14e-05
chr14	21101219	21101719	*	4.14	5.11	-0.29	5.4	2.08e-06	3.14e-05
chr15	65645677	65646177	*	6.23	7.07	3.96	3.11	2.09e-06	3.15e-05
chr7	158656437	158656937	*	5.58	6.44	3.08	3.36	2.09e-06	3.15e-05
[truncated: 28,159 more rows]

## Sheet: Veh vs 17α-E2(100nM)
seqnames	start	end	strand	Conc	Conc_17a_100nm	Conc_VEH	Fold	p.value	FDR
chr18	73415768	73416268	*	8.43	9.39	4.07	5.33	1.92e-35	5.79e-31
chr14	105628659	105629159	*	8.21	9.19	2.56	6.63	1.47e-34	2.22e-30
chr19	45852367	45852867	*	7.61	8.59	1.75	6.84	6.3e-30	6.33e-26
chr8	143065404	143065904	*	8.99	9.94	5.09	4.84	1.19e-29	8.99e-26
chr11	74021803	74022303	*	7.68	8.62	3.97	4.65	1.61e-27	9.69e-24
chr1	1342742	1343242	*	7.23	8.21	2.57	5.64	2.49e-27	1.21e-23
chr8	144657828	144658328	*	8.28	9.23	4.37	4.86	2.82e-27	1.21e-23
chr19	30364024	30364524	*	7.51	8.46	3.72	4.74	8.21e-27	3.09e-23
chr22	20243535	20244035	*	7.02	8.01	1.41	6.6	2.98e-26	9.98e-23
chr16	598403	598903	*	7.48	8.45	3.04	5.4	9.24e-26	2.79e-22
chr7	1270854	1271354	*	6.84	7.81	2.04	5.77	1.2e-25	3.28e-22
chr3	12329610	12330110	*	7.36	8.31	3.5	4.81	9.25e-25	2.32e-21
chr17	37773961	37774461	*	7.38	8.36	2.14	6.22	1.09e-24	2.54e-21
chr19	55685317	55685817	*	6.92	7.9	2.06	5.84	1.84e-24	3.96e-21
chr9	130516978	130517478	*	7.79	8.74	3.83	4.91	2.8e-24	5.63e-21
chr1	10733996	10734496	*	7.2	8.15	3.35	4.8	6.41e-24	1.21e-20
chr22	23628211	23628711	*	6.87	7.81	3.1	4.71	8.79e-24	1.51e-20
chr16	2568575	2569075	*	7.55	8.47	4.2	4.28	9.54e-24	1.51e-20
chr7	2671730	2672230	*	8.29	9.21	5.09	4.12	9.78e-24	1.51e-20
chr15	68849526	68850026	*	7.05	7.98	3.51	4.47	1.03e-23	1.51e-20
chr11	67033011	67033511	*	7.06	8.01	3.18	4.82	1.05e-23	1.51e-20
chr14	106083255	106083755	*	6.86	7.84	1.91	5.92	1.13e-23	1.55e-20
chr16	33956929	33957429	*	7.95	8.87	4.78	4.09	1.6e-23	2.09e-20
chr1	21948548	21949048	*	7.85	8.8	3.93	4.87	1.69e-23	2.13e-20
chr17	62066383	62066883	*	6.64	7.61	2.09	5.52	1.79e-23	2.16e-20
chr7	91763953	91764453	*	6.93	7.91	1.97	5.94	2.02e-23	2.35e-20
chr7	44572923	44573423	*	6.65	7.63	1.35	6.28	2.32e-23	2.59e-20
chr6	166795428	166795928	*	6.67	7.66	1.32	6.33	2.66e-23	2.87e-20
chr17	79410314	79410814	*	6.86	7.84	1.26	6.58	2.82e-23	2.94e-20
chr20	60895731	60896231	*	8.02	8.93	4.89	4.04	5.89e-23	5.92e-20
chr19	55953829	55954329	*	6.8	7.78	1.77	6	6.67e-23	6.49e-20
chr19	41117995	41118495	*	8.23	9.17	4.55	4.62	7.97e-23	7.51e-20
chr22	41865083	41865583	*	6.7	7.69	0.76	6.93	1.23e-22	1.12e-19
chr12	52267189	52267689	*	6.61	7.59	1.13	6.47	1.27e-22	1.13e-19
chr17	42835617	42836117	*	7.06	8.03	2.5	5.54	2.23e-22	1.92e-19
chr19	3203997	3204497	*	6.65	7.62	1.98	5.63	2.3e-22	1.93e-19
chr1	36273896	36274396	*	6.93	7.91	1.51	6.4	3.75e-22	3.05e-19
chr2	241405146	241405646	*	7.23	8.16	3.75	4.41	3.97e-22	3.15e-19
chr17	39823451	39823951	*	6.91	7.87	3.02	4.84	4.33e-22	3.35e-19
chr16	2524309	2524809	*	6.82	7.8	1.51	6.29	4.77e-22	3.59e-19
chr22	50495801	50496301	*	7.78	8.7	4.56	4.14	7.08e-22	5.21e-19
chr10	5726664	5727164	*	7.14	8.09	3.3	4.79	9.27e-22	6.65e-19
chr19	35491116	35491616	*	6.7	7.68	1.79	5.89	1.39e-21	9.76e-19
chr6	3751623	3752123	*	7.8	8.72	4.57	4.15	2.03e-21	1.39e-18
chr19	16142340	16142840	*	7.59	8.51	4.35	4.16	2.15e-21	1.42e-18
chr17	73739716	73740216	*	6.29	7.27	1.67	5.59	2.16e-21	1.42e-18
chr10	134809722	134810222	*	7.31	8.24	3.89	4.35	4.13e-21	2.65e-18
chr1	65720255	65720755	*	7.16	8.1	3.5	4.6	6.25e-21	3.92e-18
chr17	57970598	57971098	*	6.56	7.53	1.69	5.84	9.62e-21	5.92e-18
chr16	2111498	2111998	*	6.34	7.31	1.62	5.69	1.26e-20	7.61e-18
chr16	851546	852046	*	6.69	7.66	2.28	5.37	1.34e-20	7.91e-18
chr1	53874087	53874587	*	6.29	7.27	0.76	6.51	1.41e-20	8.15e-18
chr22	46528616	46529116	*	6.26	7.22	2.06	5.16	1.78e-20	1.01e-17
chr17	79096749	79097249	*	6.53	7.47	2.8	4.68	1.8e-20	1.01e-17
chr12	109250649	109251149	*	6.48	7.44	2.36	5.08	1.96e-20	1.07e-17
chr22	50244149	50244649	*	6.47	7.43	2.07	5.36	2.09e-20	1.12e-17
chr17	79268445	79268945	*	6.43	7.41	1.5	5.91	2.11e-20	1.12e-17
chr8	144094803	144095303	*	6.31	7.29	1.26	6.03	2.16e-20	1.12e-17
chr5	14582161	14582661	*	6.66	7.6	2.92	4.68	2.53e-20	1.29e-17
chr2	233511648	233512148	*	6.42	7.38	1.91	5.47	3.98e-20	1.99e-17
chr16	75273419	75273919	*	6.94	7.87	3.52	4.35	4.04e-20	1.99e-17
chr5	150004653	150005153	*	6.43	7.4	2	5.4	4.37e-20	2.12e-17
chr22	43544562	43545062	*	7.14	8.06	3.77	4.29	5.52e-20	2.64e-17
chr17	77385949	77386449	*	6.63	7.57	2.99	4.58	6.75e-20	3.15e-17
chr17	30629900	30630400	*	7.66	8.57	4.58	3.98	6.8e-20	3.15e-17
chr3	48610367	48610867	*	6.26	7.25	0.76	6.49	7.13e-20	3.23e-17
chr11	65293712	65294212	*	8.17	9.06	5.32	3.74	7.17e-20	3.23e-17
chr2	46926335	46926835	*	6.6	7.57	2.29	5.27	7.38e-20	3.27e-17
chr22	24166219	24166719	*	6.21	7.18	1.39	5.8	7.56e-20	3.3e-17
chr22	50345784	50346284	*	6.9	7.84	3.19	4.65	1.04e-19	4.46e-17
chr22	45824471	45824971	*	6.79	7.72	3.4	4.32	1.11e-19	4.7e-17
chr1	3002277	3002777	*	7.23	8.15	4.02	4.12	1.28e-19	5.38e-17
chr1	16368217	16368717	*	7.44	8.39	3.42	4.97	1.41e-19	5.82e-17
chr3	125844761	125845261	*	6.4	7.36	2.33	5.03	1.45e-19	5.93e-17
chr14	101345219	101345719	*	6.44	7.37	3.04	4.33	1.51e-19	6.06e-17
chr7	1481062	1481562	*	8.09	8.99	5.1	3.9	1.56e-19	6.17e-17
chr18	77143718	77144218	*	7.47	8.4	4.17	4.23	1.91e-19	7.5e-17
chr7	5328990	5329490	*	6.23	7.21	1.22	6	2.22e-19	8.5e-17
chr19	1158746	1159246	*	6.65	7.57	3.43	4.14	2.23e-19	8.5e-17
chr21	45235744	45236244	*	6.58	7.51	3.18	4.32	2.31e-19	8.7e-17
chr11	65292495	65292995	*	8.45	9.37	5.24	4.13	2.38e-19	8.85e-17
chr20	62689345	62689845	*	6.17	7.15	0.76	6.39	2.96e-19	1.09e-16
chr19	5783296	5783796	*	6.5	7.46	2.38	5.07	3.02e-19	1.1e-16
chr17	76265667	76266167	*	6.28	7.26	1.25	6.01	3.12e-19	1.12e-16
chr14	75536292	75536792	*	6.75	7.69	3.26	4.43	3.19e-19	1.13e-16
chr2	131850462	131850962	*	7.99	8.9	5.03	3.87	3.22e-19	1.13e-16
chr19	3820610	3821110	*	7.01	7.95	3.47	4.48	3.38e-19	1.17e-16
chr8	143500015	143500515	*	7.28	8.18	4.38	3.8	3.46e-19	1.19e-16
chr1	31196295	31196795	*	7.76	8.67	4.74	3.93	3.53e-19	1.2e-16
chr17	72876911	72877411	*	6.1	7.08	1.3	5.78	3.92e-19	1.31e-16
chr22	46506450	46506950	*	6.76	7.68	3.65	4.03	4.3e-19	1.42e-16
chr17	4462264	4462764	*	6.39	7.37	1.5	5.87	4.33e-19	1.42e-16
chr4	1761899	1762399	*	6.61	7.54	3.36	4.17	4.37e-19	1.42e-16
chr5	893133	893633	*	7.01	7.93	3.82	4.11	4.42e-19	1.42e-16
chr19	36269066	36269566	*	6.03	7	1.27	5.73	4.9e-19	1.55e-16
chr11	67784694	67785194	*	7.81	8.7	5.02	3.68	5.94e-19	1.87e-16
chr16	68278472	68278972	*	6.35	7.33	1.51	5.82	6.07e-19	1.89e-16
chr4	184365246	184365746	*	6.77	7.7	3.39	4.31	6.14e-19	1.89e-16
chr7	73402343	73402843	*	6.44	7.36	3.16	4.21	6.65e-19	2.02e-16
chr8	22433995	22434495	*	7.02	7.92	4.05	3.87	7.01e-19	2.11e-16
chr10	80972603	80973103	*	6.64	7.58	2.84	4.75	8.42e-19	2.51e-16
chr16	89784006	89784506	*	6.81	7.75	3.35	4.4	9.9e-19	2.93e-16
chr1	228327958	228328458	*	6.87	7.79	3.71	4.09	1.05e-18	3.09e-16
chr5	546363	546863	*	7	7.9	4.01	3.89	1.13e-18	3.24e-16
chr6	693619	694119	*	6.18	7.15	1.81	5.33	1.13e-18	3.24e-16
chr5	665006	665506	*	7.52	8.41	4.69	3.72	1.14e-18	3.24e-16
chr16	2255945	2256445	*	7.2	8.1	4.37	3.72	1.16e-18	3.28e-16
chr22	23412511	23413011	*	8.51	9.4	5.75	3.65	1.36e-18	3.75e-16
chr20	62134233	62134733	*	6.2	7.14	2.52	4.62	1.36e-18	3.75e-16
chr19	989380	989880	*	6.99	7.9	3.86	4.04	1.39e-18	3.81e-16
chr1	51795933	51796433	*	7.31	8.23	4.05	4.18	1.45e-18	3.93e-16
chr2	133025469	133025969	*	7.88	8.82	4.36	4.46	1.46e-18	3.93e-16
chr19	18060714	18061214	*	6.07	7.05	0.94	6.11	1.76e-18	4.67e-16
chr8	142329127	142329627	*	9.47	10.37	6.45	3.92	1.77e-18	4.67e-16
chr1	153467572	153468072	*	5.93	6.9	1.52	5.38	1.78e-18	4.68e-16
chr20	3002550	3003050	*	6.16	7.11	2.38	4.73	2.18e-18	5.67e-16
chr22	19462200	19462700	*	6.78	7.72	3.13	4.59	2.34e-18	6.04e-16
chr8	98881523	98882023	*	6.48	7.45	1.82	5.63	2.42e-18	6.18e-16
chr22	38084688	38085188	*	6.94	7.85	3.86	4	2.6e-18	6.58e-16
chr16	3213380	3213880	*	6.04	7	1.63	5.37	2.72e-18	6.84e-16
chr19	51628864	51629364	*	6.11	7.1	0.3	6.8	3.01e-18	7.5e-16
chr19	50909659	50910159	*	7.43	8.36	4.04	4.33	3.05e-18	7.54e-16
chr11	61528000	61528500	*	7.52	8.46	4.08	4.38	3.08e-18	7.56e-16
chr17	2615433	2615933	*	7.17	8.09	3.93	4.16	3.23e-18	7.85e-16
chr16	85321760	85322260	*	6.03	7.01	0.76	6.26	3.29e-18	7.92e-16
chr17	74522421	74522921	*	6.02	7	0.55	6.46	3.31e-18	7.92e-16
chr19	41726936	41727436	*	6.36	7.34	1.73	5.61	3.97e-18	9.42e-16
chr9	140328105	140328605	*	6.16	7.14	0.79	6.35	4.09e-18	9.64e-16
chr2	234726526	234727026	*	6.36	7.3	2.84	4.46	4.84e-18	1.13e-15
chr8	27527987	27528487	*	5.99	6.97	0.97	6	4.98e-18	1.15e-15
chr11	76917085	76917585	*	5.98	6.93	2.17	4.76	5.15e-18	1.19e-15
chr20	61675346	61675846	*	7.94	8.82	5.24	3.58	5.58e-18	1.28e-15
chr17	80548662	80549162	*	6.54	7.47	3.12	4.35	5.77e-18	1.31e-15
chr17	60781038	60781538	*	7.46	8.43	3.06	5.37	5.92e-18	1.33e-15
chr22	46448690	46449190	*	6.06	7.03	1.26	5.77	5.99e-18	1.34e-15
chr12	5726094	5726594	*	6.46	7.4	2.94	4.46	6.2e-18	1.37e-15
chr12	122238156	122238656	*	6.64	7.57	3.16	4.41	6.32e-18	1.39e-15
chr19	7917713	7918213	*	5.88	6.84	1.92	4.91	7.01e-18	1.53e-15
chr2	241325147	241325647	*	6.15	7.11	1.86	5.24	7.18e-18	1.56e-15
chr19	51843222	51843722	*	7.06	8	3.57	4.43	7.3e-18	1.57e-15
chr4	1769305	1769805	*	6.19	7.14	2.33	4.81	7.52e-18	1.61e-15
chr20	61163488	61163988	*	6.36	7.31	2.58	4.73	7.95e-18	1.69e-15
chr22	46509460	46509960	*	6.74	7.71	2.07	5.64	8.12e-18	1.71e-15
chr17	75296833	75297333	*	7.73	8.64	4.67	3.97	8.37e-18	1.75e-15
chr19	18699489	18699989	*	6.29	7.22	3	4.22	8.72e-18	1.81e-15
chr8	142433345	142433845	*	5.97	6.95	0.94	6.01	8.77e-18	1.81e-15
chr20	25228131	25228631	*	6.47	7.4	3.17	4.22	9.22e-18	1.89e-15
chr8	142443521	142444021	*	6.59	7.53	3.17	4.36	9.27e-18	1.89e-15
chr8	59465408	59465908	*	6.44	7.37	3	4.37	9.34e-18	1.89e-15
chr12	125576994	125577494	*	6.68	7.59	3.58	4.01	9.73e-18	1.96e-15
chr11	67173355	67173855	*	8.02	8.93	4.97	3.96	1.03e-17	2.06e-15
chr9	139560195	139560695	*	6.83	7.83	-0.37	8.19	1.11e-17	2.2e-15
chr11	69390796	69391296	*	6	6.96	1.96	5	1.24e-17	2.45e-15
chr16	67707129	67707629	*	6.8	7.69	3.93	3.77	1.34e-17	2.63e-15
chr9	139520059	139520559	*	7.02	7.94	3.8	4.14	1.35e-17	2.63e-15
chr7	1399672	1400172	*	6.59	7.5	3.51	3.99	1.38e-17	2.66e-15
chr16	85715906	85716406	*	7.14	8.07	3.74	4.34	1.41e-17	2.7e-15
chr2	220417435	220417935	*	7.27	8.18	4.33	3.85	1.45e-17	2.77e-15
chr12	133043245	133043745	*	7.44	8.34	4.56	3.78	1.51e-17	2.86e-15
chr7	2353469	2353969	*	6.09	7.06	1.63	5.42	1.59e-17	2.99e-15
chr5	49505	50005	*	8.77	9.69	5.59	4.1	1.6e-17	3e-15
chr22	46504730	46505230	*	7.24	8.16	4.11	4.05	1.68e-17	3.13e-15
chr21	46412426	46412926	*	6.52	7.43	3.42	4.01	1.71e-17	3.16e-15
chr17	73234114	73234614	*	6.85	7.75	3.84	3.92	1.78e-17	3.28e-15
chr22	36833183	36833683	*	6.39	7.31	3.29	4.02	1.9e-17	3.46e-15
chr3	52418429	52418929	*	7.14	8.04	4.25	3.79	1.91e-17	3.46e-15
chr22	50690298	50690798	*	6.18	7.15	1.5	5.65	2.05e-17	3.69e-15
chr2	29272467	29272967	*	6.24	7.2	2.15	5.04	2.24e-17	4.02e-15
chr8	144637548	144638048	*	7.93	8.83	5.14	3.69	2.37e-17	4.23e-15
chr3	47619295	47619795	*	6.47	7.44	2.07	5.37	2.42e-17	4.3e-15
chr19	39219412	39219912	*	7.46	8.39	4.2	4.19	2.47e-17	4.35e-15
chr8	143332952	143333452	*	7.33	8.22	4.62	3.6	2.51e-17	4.4e-15
chr8	143554028	143554528	*	6.68	7.61	3.3	4.31	2.56e-17	4.46e-15
chr7	98970215	98970715	*	6.91	7.81	4.06	3.75	2.63e-17	4.54e-15
chr22	36957539	36958039	*	6.65	7.59	3.09	4.5	2.63e-17	4.54e-15
chr16	701543	702043	*	6.15	7.12	1.03	6.09	2.7e-17	4.63e-15
chr11	66495334	66495834	*	6.15	7.12	1.82	5.3	2.75e-17	4.69e-15
chr9	139727874	139728374	*	6.25	7.21	2.27	4.94	2.85e-17	4.82e-15
chr14	65701341	65701841	*	5.96	6.93	1.32	5.61	2.93e-17	4.93e-15
chr11	9685618	9686118	*	6.25	7.22	2	5.22	3.05e-17	5.09e-15
chr2	10206202	10206702	*	6.99	7.88	4.23	3.65	3.05e-17	5.09e-15
chr1	1840041	1840541	*	6.49	7.45	2.23	5.22	3.27e-17	5.42e-15
chr22	49556371	49556871	*	7.7	8.59	5.02	3.57	3.34e-17	5.5e-15
chr12	50422386	50422886	*	5.97	6.91	2.44	4.46	3.41e-17	5.59e-15
chr22	42218428	42218928	*	6.23	7.2	1.73	5.47	3.47e-17	5.65e-15
chr3	51997754	51998254	*	6	6.95	1.91	5.05	3.61e-17	5.85e-15
chr7	1582630	1583130	*	5.86	6.83	0.94	5.89	3.89e-17	6.27e-15
chr1	1092069	1092569	*	6.54	7.45	3.5	3.94	4.29e-17	6.84e-15
chr22	19737234	19737734	*	8.21	9.13	5.05	4.07	4.32e-17	6.84e-15
chr2	240076625	240077125	*	8.15	9.02	5.62	3.4	4.33e-17	6.84e-15
chr19	45667902	45668402	*	6.06	7.02	2.08	4.94	4.33e-17	6.84e-15
chr11	67399913	67400413	*	6.18	7.13	2.15	4.98	4.52e-17	7.09e-15
chr1	228561021	228561521	*	5.95	6.93	1.11	5.82	4.57e-17	7.14e-15
chr3	127371859	127372359	*	6.82	7.75	3.36	4.39	5.02e-17	7.77e-15
chr19	42789410	42789910	*	5.78	6.75	1.22	5.54	5.03e-17	7.77e-15
chr2	241330673	241331173	*	5.82	6.8	0.95	5.85	5.38e-17	8.27e-15
chr12	122670143	122670643	*	5.76	6.72	1.25	5.47	5.44e-17	8.32e-15
chr19	7594436	7594936	*	6.44	7.38	2.84	4.53	5.7e-17	8.68e-15
chr22	20192541	20193041	*	6.72	7.63	3.7	3.93	5.8e-17	8.79e-15
chr13	113688754	113689254	*	6.18	7.11	2.73	4.37	5.83e-17	8.79e-15
chr20	61699057	61699557	*	6.28	7.19	3.22	3.97	6.06e-17	9.09e-15
chr16	2033568	2034068	*	5.79	6.75	1.51	5.24	6.21e-17	9.27e-15
chr22	37701723	37702223	*	6	6.97	1.24	5.73	6.73e-17	9.99e-15
chr1	985664	986164	*	6.1	7.05	2.16	4.89	7.48e-17	1.11e-14
chr6	11737612	11738112	*	7.17	8.09	4.04	4.05	7.62e-17	1.12e-14
chr10	73380212	73380712	*	6.74	7.69	2.99	4.69	7.89e-17	1.15e-14
chr1	51778058	51778558	*	7.2	8.12	3.93	4.18	8.02e-17	1.17e-14
chr16	11767168	11767668	*	5.89	6.87	0.5	6.37	8.05e-17	1.17e-14
chr4	2061941	2062441	*	5.88	6.86	0.3	6.56	8.46e-17	1.22e-14
chr18	14334458	14334958	*	6.57	7.47	3.69	3.79	8.83e-17	1.27e-14
chr7	2508372	2508872	*	6.94	7.82	4.3	3.52	9.15e-17	1.31e-14
chr3	52547761	52548261	*	6.18	7.15	1.72	5.43	9.36e-17	1.33e-14
chr19	18577146	18577646	*	6.15	7.1	2.49	4.61	1.01e-16	1.44e-14
chr16	3067431	3067931	*	5.95	6.93	1.25	5.68	1.07e-16	1.51e-14
chr2	71215191	71215691	*	5.85	6.82	1.03	5.79	1.08e-16	1.51e-14
chr8	144472219	144472719	*	9.07	9.97	6.14	3.84	1.12e-16	1.56e-14
chr22	50326564	50327064	*	7.46	8.38	4.22	4.16	1.21e-16	1.68e-14
chr8	144309591	144310091	*	6.56	7.47	3.62	3.85	1.24e-16	1.72e-14
chr9	140056577	140057077	*	6.62	7.57	2.9	4.66	1.25e-16	1.72e-14
chr19	35155169	35155669	*	6.27	7.19	3	4.19	1.25e-16	1.72e-14
chr18	76814608	76815108	*	5.65	6.61	1.11	5.51	1.27e-16	1.72e-14
chr11	68704186	68704686	*	6.68	7.61	3.34	4.27	1.27e-16	1.72e-14
chr9	139231761	139232261	*	5.71	6.68	0.9	5.78	1.28e-16	1.73e-14
chr5	132784631	132785131	*	6.05	6.97	2.83	4.14	1.29e-16	1.74e-14
chr16	89251066	89251566	*	6.39	7.31	3.14	4.16	1.33e-16	1.78e-14
chr15	77320051	77320551	*	6.39	7.38	-0.37	7.75	1.34e-16	1.78e-14
chr22	38477857	38478357	*	7.5	8.4	4.69	3.71	1.49e-16	1.98e-14
chr21	46740941	46741441	*	5.97	6.95	1.25	5.7	1.64e-16	2.17e-14
chr5	1241327	1241827	*	5.74	6.72	0.56	6.17	1.7e-16	2.23e-14
chr17	17762491	17762991	*	5.92	6.88	1.84	5.04	1.71e-16	2.24e-14
chr9	139409545	139410045	*	5.75	6.73	0.71	6.02	1.73e-16	2.25e-14
chr6	168135663	168136163	*	8.37	9.27	5.51	3.76	1.76e-16	2.29e-14
chr5	6508008	6508508	*	7.57	8.48	4.66	3.82	1.88e-16	2.43e-14
chr7	101006987	101007487	*	6.16	7.13	1.51	5.62	1.96e-16	2.52e-14
chr2	130672578	130673078	*	8.48	9.38	5.58	3.8	1.96e-16	2.52e-14
chr1	31192373	31192873	*	5.81	6.78	1.49	5.28	1.98e-16	2.53e-14
chr17	41855850	41856350	*	6.63	7.57	3.01	4.56	2.04e-16	2.59e-14
chr19	1483820	1484320	*	5.68	6.64	1.48	5.17	2.47e-16	3.13e-14
chr8	143707649	143708149	*	6.77	7.72	2.89	4.83	2.55e-16	3.22e-14
chr15	44281908	44282408	*	7.21	8.11	4.32	3.79	2.62e-16	3.29e-14
chr1	917052	917552	*	7.83	8.72	5.16	3.56	2.65e-16	3.3e-14
chr5	177623965	177624465	*	6.53	7.43	3.53	3.9	2.65e-16	3.3e-14
chr16	617049	617549	*	5.97	6.93	2.03	4.89	2.76e-16	3.43e-14
chr11	2144146	2144646	*	6.48	7.42	2.66	4.77	2.78e-16	3.43e-14
chr1	32660523	32661023	*	7.36	8.27	4.26	4.01	2.84e-16	3.49e-14
chr22	36594805	36595305	*	6.66	7.57	3.62	3.95	2.94e-16	3.6e-14
chr11	47371289	47371789	*	6.85	7.77	3.58	4.19	2.95e-16	3.61e-14
chr14	104009700	104010200	*	6.34	7.29	2.53	4.76	3.22e-16	3.92e-14
chr17	76274651	76275151	*	6.61	7.54	3.26	4.27	3.25e-16	3.93e-14
chr22	50693001	50693501	*	5.96	6.95	0.01	6.94	3.27e-16	3.94e-14
chr17	43095839	43096339	*	7.35	8.24	4.64	3.6	3.51e-16	4.22e-14
chr10	134728879	134729379	*	5.85	6.81	1.59	5.22	3.59e-16	4.3e-14
chr22	25800713	25801213	*	7.1	8	4.2	3.81	3.67e-16	4.37e-14
chr4	3504390	3504890	*	7.55	8.42	4.94	3.48	3.91e-16	4.65e-14
chr1	110752172	110752672	*	6.68	7.6	3.58	4.02	3.98e-16	4.71e-14
chr10	46993618	46994118	*	6.22	7.17	2.43	4.74	4.24e-16	4.99e-14
chr16	2586259	2586759	*	6.82	7.71	4.05	3.66	4.35e-16	5.1e-14
chr20	61152001	61152501	*	5.71	6.69	0.3	6.39	4.45e-16	5.2e-14
chr11	6624500	6625000	*	6.57	7.48	3.57	3.91	4.5e-16	5.23e-14
chr5	748761	749261	*	6.41	7.37	2.3	5.07	4.69e-16	5.42e-14
chr16	1829955	1830455	*	5.93	6.89	1.95	4.94	4.69e-16	5.42e-14
chr9	133281037	133281537	*	6.72	7.66	3.29	4.37	5.02e-16	5.78e-14
chr7	151083001	151083501	*	6.2	7.11	3.12	3.99	5.07e-16	5.79e-14
chr7	566356	566856	*	6.41	7.32	3.47	3.84	5.07e-16	5.79e-14
chr22	19708365	19708865	*	6.23	7.15	3.08	4.07	5.09e-16	5.79e-14
chr22	46449509	46450009	*	6.11	7.05	2.48	4.56	5.16e-16	5.84e-14
chr22	20108096	20108596	*	7.57	8.5	4.32	4.18	5.21e-16	5.88e-14
chr14	105899498	105899998	*	6	6.97	1.79	5.18	5.37e-16	6.04e-14
chr15	65028314	65028814	*	7.39	8.3	4.41	3.89	5.42e-16	6.08e-14
chr17	81027832	81028332	*	7.18	8.1	3.98	4.12	5.57e-16	6.22e-14
chr1	2245067	2245567	*	6.82	7.72	3.86	3.86	5.62e-16	6.25e-14
chr9	137207682	137208182	*	6.51	7.47	2.4	5.07	5.72e-16	6.34e-14
chr3	48611947	48612447	*	5.85	6.78	2.59	4.19	5.83e-16	6.44e-14
chr20	3682353	3682853	*	5.64	6.62	1.01	5.6	5.95e-16	6.54e-14
chr7	44646427	44646927	*	5.63	6.6	0.76	5.84	5.97e-16	6.54e-14
chr16	87874822	87875322	*	6.49	7.38	3.72	3.66	6.08e-16	6.64e-14
chr10	120924775	120925275	*	7.08	7.98	4.27	3.71	6.12e-16	6.67e-14
chr8	143377933	143378433	*	6.35	7.31	2.43	4.88	6.17e-16	6.7e-14
chr11	70509633	70510133	*	5.69	6.66	1.35	5.3	6.37e-16	6.89e-14
chr10	70748526	70749026	*	6.48	7.45	2.07	5.38	6.69e-16	7.21e-14
chr17	80597451	80597951	*	7.45	8.33	4.77	3.56	6.75e-16	7.24e-14
chr17	78080976	78081476	*	6.92	7.82	4.11	3.71	6.86e-16	7.34e-14
chr19	5030119	5030619	*	6.17	7.11	2.71	4.4	7.19e-16	7.66e-14
chr5	53813697	53814197	*	6.01	6.98	1.61	5.36	7.31e-16	7.76e-14
chr1	7830957	7831457	*	5.73	6.69	1.49	5.2	7.5e-16	7.94e-14
chr1	1468406	1468906	*	5.76	6.71	1.62	5.1	7.59e-16	8e-14
chr16	85525186	85525686	*	6.61	7.52	3.55	3.97	7.91e-16	8.28e-14
chr10	43870960	43871460	*	5.71	6.68	1.25	5.43	7.92e-16	8.28e-14
chr2	219289059	219289559	*	5.7	6.67	1.17	5.5	7.94e-16	8.28e-14
chr19	7991863	7992363	*	6.4	7.29	3.64	3.64	9.31e-16	9.68e-14
chr19	14076545	14077045	*	6.3	7.22	3.1	4.12	9.38e-16	9.72e-14
chr1	2527579	2528079	*	5.74	6.71	1.5	5.2	9.47e-16	9.78e-14
chr5	533616	534116	*	5.78	6.75	1.03	5.72	9.82e-16	1.01e-13
chr9	129423257	129423757	*	6.03	7	1.72	5.28	9.89e-16	1.01e-13
chr8	142355954	142356454	*	7.18	8.08	4.27	3.81	1.07e-15	1.1e-13
chr9	139585556	139586056	*	6.9	7.78	4.28	3.5	1.12e-15	1.14e-13
chr7	1460971	1461471	*	6.89	7.8	3.92	3.88	1.14e-15	1.15e-13
chr19	59037147	59037647	*	6.11	7.03	2.96	4.07	1.15e-15	1.16e-13
chr3	127262868	127263368	*	7.12	8.02	4.23	3.79	1.16e-15	1.17e-13
chr17	48922964	48923464	*	6.95	7.84	4.19	3.65	1.17e-15	1.18e-13
chr9	99328687	99329187	*	6.08	7.03	2.18	4.85	1.19e-15	1.19e-13
chr19	51293967	51294467	*	5.89	6.88	0.01	6.87	1.23e-15	1.23e-13
chr10	43601242	43601742	*	5.59	6.55	1.45	5.1	1.26e-15	1.25e-13
chr5	179125800	179126300	*	5.97	6.93	1.63	5.3	1.28e-15	1.27e-13
chr19	3094738	3095238	*	6.85	7.75	3.95	3.8	1.3e-15	1.29e-13
chr22	37579254	37579754	*	6.76	7.67	3.76	3.9	1.32e-15	1.3e-13
chr9	129460599	129461099	*	5.71	6.68	1.24	5.44	1.39e-15	1.37e-13
chr7	2472041	2472541	*	5.78	6.75	1.25	5.5	1.4e-15	1.37e-13
chr12	132338702	132339202	*	5.74	6.71	0.94	5.77	1.45e-15	1.41e-13
chr11	67040683	67041183	*	6.16	7.07	2.97	4.11	1.47e-15	1.43e-13
chr19	674153	674653	*	5.49	6.45	1.11	5.34	1.49e-15	1.45e-13
chr22	24167623	24168123	*	7.31	8.2	4.54	3.66	1.52e-15	1.47e-13
chr7	2563258	2563758	*	7.27	8.18	4.16	4.02	1.54e-15	1.48e-13
chr11	70390455	70390955	*	5.68	6.65	1.25	5.4	1.62e-15	1.55e-13
chr14	65427717	65428217	*	6.14	7.08	2.54	4.54	1.62e-15	1.55e-13
chr22	50351213	50351713	*	6.36	7.27	3.31	3.96	1.64e-15	1.57e-13
chr19	55678516	55679016	*	6.08	7.07	-0.37	7.43	1.72e-15	1.64e-13
chr8	142219185	142219685	*	7.27	8.17	4.44	3.73	1.75e-15	1.66e-13
chr19	2060984	2061484	*	6.18	7.09	3.2	3.89	1.78e-15	1.68e-13
chr20	61695529	61696029	*	6.65	7.55	3.66	3.89	1.82e-15	1.71e-13
chr1	21037228	21037728	*	6.74	7.61	4.25	3.36	1.83e-15	1.71e-13
chr22	39151495	39151995	*	7.13	8.05	3.97	4.08	1.85e-15	1.73e-13
chr8	143690506	143691006	*	6.08	7.01	2.64	4.37	1.87e-15	1.74e-13
chr19	36207504	36208004	*	7.34	8.24	4.43	3.81	1.94e-15	1.81e-13
chr12	124845848	124846348	*	5.94	6.88	2.39	4.49	1.95e-15	1.81e-13
chr1	33815605	33816105	*	6.01	6.97	1.88	5.08	2e-15	1.85e-13
chr1	41837724	41838224	*	6.7	7.63	3.3	4.33	2.01e-15	1.85e-13
chr17	30592434	30592934	*	7.37	8.24	4.88	3.36	2.04e-15	1.87e-13
chr22	18917752	18918252	*	5.77	6.72	1.88	4.84	2.23e-15	2.04e-13
chr1	151773211	151773711	*	5.76	6.74	0.5	6.25	2.24e-15	2.05e-13
chr15	76018649	76019149	*	6.11	7.1	-0.37	7.47	2.25e-15	2.05e-13
chr14	105395253	105395753	*	6.14	7.04	3.16	3.88	2.37e-15	2.15e-13
chr22	49935320	49935820	*	5.74	6.73	0.13	6.6	2.38e-15	2.16e-13
chr19	42830073	42830573	*	5.7	6.68	0.77	5.91	2.39e-15	2.16e-13
chr2	112464172	112464672	*	7	7.87	4.46	3.41	2.42e-15	2.18e-13
chr20	35401803	35402303	*	6.05	7.04	-0.37	7.4	2.57e-15	2.3e-13
chr19	42497885	42498385	*	5.86	6.82	1.82	5	2.59e-15	2.32e-13
chr15	40763294	40763794	*	6.29	7.2	3.2	4	2.61e-15	2.32e-13
chr16	711400	711900	*	5.57	6.54	0.76	5.79	2.63e-15	2.34e-13
chr6	43459784	43460284	*	6.14	7.05	3.06	3.99	2.64e-15	2.34e-13
chr19	1098040	1098540	*	5.59	6.55	1.62	4.93	2.78e-15	2.46e-13
chr8	143832174	143832674	*	6.63	7.53	3.74	3.79	2.93e-15	2.58e-13
chr16	89033977	89034477	*	5.55	6.52	0.76	5.76	2.94e-15	2.58e-13
chr20	60824729	60825229	*	5.75	6.74	0.13	6.61	3e-15	2.62e-13
chr1	236227708	236228208	*	6.69	7.59	3.87	3.71	3e-15	2.62e-13
chr7	2443283	2443783	*	6.18	7.17	-0.37	7.54	3.01e-15	2.63e-13
chr17	65242014	65242514	*	6.47	7.38	3.47	3.91	3.03e-15	2.63e-13
chr8	145647610	145648110	*	6.29	7.23	2.61	4.63	3.1e-15	2.68e-13
chr3	10377021	10377521	*	6.64	7.58	3.05	4.52	3.16e-15	2.73e-13
chr11	75871548	75872048	*	5.81	6.74	2.42	4.32	3.33e-15	2.86e-13
chr22	21310875	21311375	*	5.64	6.61	1.16	5.45	3.34e-15	2.86e-13
chr16	85636270	85636770	*	6.09	7.02	2.64	4.38	3.34e-15	2.86e-13
chr16	84816121	84816621	*	5.56	6.54	0.79	5.75	3.37e-15	2.88e-13
chr17	48241620	48242120	*	6.28	7.17	3.45	3.72	3.38e-15	2.88e-13
chr20	61942796	61943296	*	7.47	8.36	4.69	3.67	3.48e-15	2.95e-13
chr16	11836031	11836531	*	6.92	7.83	3.9	3.93	3.49e-15	2.95e-13
chr8	143895755	143896255	*	7.98	8.83	5.62	3.2	3.49e-15	2.95e-13
chr5	1654166	1654666	*	6.01	7	-0.37	7.37	3.75e-15	3.16e-13
chr17	37773205	37773705	*	5.71	6.64	2.27	4.37	3.84e-15	3.23e-13
chr1	2446211	2446711	*	6.13	7.05	2.94	4.1	3.92e-15	3.28e-13
chr7	47679016	47679516	*	7.31	8.17	4.89	3.28	3.98e-15	3.33e-13
chr10	72438101	72438601	*	5.59	6.55	1.27	5.28	4.03e-15	3.36e-13
chr9	137533756	137534256	*	6.72	7.66	3.16	4.5	4.12e-15	3.43e-13
chr22	50220561	50221061	*	7.06	8	3.34	4.66	4.19e-15	3.47e-13
chr16	81322332	81322832	*	5.53	6.5	0.76	5.74	4.26e-15	3.52e-13
chr19	19646024	19646524	*	6.64	7.52	3.95	3.57	4.29e-15	3.53e-13
chr14	105804745	105805245	*	7.24	8.13	4.5	3.63	4.44e-15	3.65e-13
chr22	38132848	38133348	*	7.12	7.99	4.59	3.41	4.78e-15	3.91e-13
chr15	42127196	42127696	*	6.31	7.25	2.67	4.58	4.8e-15	3.92e-13
chr20	62597576	62598076	*	5.6	6.58	0.3	6.28	4.91e-15	4e-13
chr17	48626826	48627326	*	7.64	8.55	4.58	3.97	4.99e-15	4.05e-13
chr1	32149569	32150069	*	8.29	9.2	5.17	4.03	5.09e-15	4.12e-13
chr8	143533860	143534360	*	6.29	7.28	-0.37	7.65	5.1e-15	4.12e-13
chr2	128398447	128398947	*	6.81	7.68	4.23	3.45	5.13e-15	4.13e-13
chr2	224903410	224903910	*	7.15	8.05	4.34	3.71	5.16e-15	4.15e-13
chr20	49330792	49331292	*	5.52	6.48	1.26	5.22	5.18e-15	4.15e-13
chr11	64137181	64137681	*	5.51	6.49	0.4	6.09	5.25e-15	4.2e-13
chr19	54849364	54849864	*	5.59	6.56	0.95	5.61	5.26e-15	4.2e-13
chr16	2083090	2083590	*	6.47	7.41	2.88	4.53	5.29e-15	4.21e-13
chr22	39603901	39604401	*	6.03	6.94	3.06	3.87	5.41e-15	4.29e-13
chr17	79151879	79152379	*	8.01	8.9	5.24	3.66	5.45e-15	4.3e-13
chr22	46339128	46339628	*	5.95	6.94	-0.37	7.31	5.45e-15	4.3e-13
chr16	2208234	2208734	*	5.65	6.59	2.06	4.54	5.65e-15	4.44e-13
chr3	46506509	46507009	*	6.16	7.09	2.85	4.24	5.66e-15	4.44e-13
chr19	40361077	40361577	*	7.42	8.33	4.37	3.96	5.73e-15	4.49e-13
chr4	6330939	6331439	*	7.62	8.49	5.11	3.38	5.75e-15	4.49e-13
chr1	7024086	7024586	*	6.35	7.23	3.6	3.63	5.86e-15	4.57e-13
chr7	102067200	102067700	*	6.35	7.24	3.63	3.61	5.88e-15	4.57e-13
chr11	113962553	113963053	*	5.58	6.53	1.61	4.92	6.02e-15	4.66e-13
chr12	125050242	125050742	*	6.2	7.11	3.15	3.96	6.16e-15	4.76e-13
chr13	113969211	113969711	*	5.6	6.56	1.25	5.31	6.27e-15	4.83e-13
chr17	65243871	65244371	*	6.97	7.86	4.18	3.68	6.45e-15	4.96e-13
chr19	19005691	19006191	*	8.41	9.27	5.96	3.31	6.48e-15	4.97e-13
chr8	144700097	144700597	*	5.91	6.82	2.93	3.89	6.74e-15	5.16e-13
chr11	65319064	65319564	*	7.84	8.74	4.95	3.78	6.78e-15	5.18e-13
chr1	3369881	3370381	*	5.93	6.92	-0.37	7.28	7.08e-15	5.39e-13
chr16	1827778	1828278	*	5.46	6.43	0.76	5.67	7.21e-15	5.48e-13
chr22	28209606	28210106	*	5.56	6.53	0.9	5.62	7.28e-15	5.51e-13
chr19	4120819	4121319	*	5.62	6.58	1.53	5.05	7.38e-15	5.58e-13
chr21	47422134	47422634	*	5.66	6.58	2.4	4.19	7.7e-15	5.8e-13
chr4	1358308	1358808	*	5.91	6.84	2.44	4.4	7.74e-15	5.82e-13
chr11	111170075	111170575	*	6.84	7.78	3.27	4.51	8.09e-15	6.07e-13
chr19	18577973	18578473	*	5.67	6.62	1.83	4.79	8.3e-15	6.21e-13
chr1	2454093	2454593	*	5.37	6.34	1.11	5.23	8.55e-15	6.38e-13
chr16	3063164	3063664	*	7.2	8.07	4.69	3.38	8.63e-15	6.43e-13
chr16	2889977	2890477	*	5.56	6.52	1.39	5.13	8.76e-15	6.51e-13
chr19	18557785	18558285	*	7.24	8.13	4.49	3.64	9.62e-15	7.13e-13
chr11	67059532	67060032	*	6.1	7	3.26	3.73	9.7e-15	7.15e-13
chr20	37499588	37500088	*	5.48	6.44	0.97	5.48	9.73e-15	7.15e-13
chr15	22502610	22503110	*	5.35	6.32	0.76	5.56	9.73e-15	7.15e-13
chr19	995064	995564	*	5.53	6.48	1.38	5.1	9.74e-15	7.15e-13
chr8	143611506	143612006	*	5.65	6.59	1.82	4.77	1e-14	7.32e-13
chr1	1837594	1838094	*	6.12	7.07	2.45	4.62	1.01e-14	7.37e-13
chr12	3443626	3444126	*	6.82	7.74	3.62	4.12	1.09e-14	7.97e-13
chr3	47205580	47206080	*	6.95	7.81	4.44	3.38	1.11e-14	8.07e-13
chr1	153333136	153333636	*	7.54	8.42	4.96	3.46	1.14e-14	8.24e-13
chr3	48690457	48690957	*	5.99	6.94	2.19	4.75	1.14e-14	8.24e-13
chr1	1977788	1978288	*	5.74	6.68	2.03	4.65	1.17e-14	8.44e-13
chr10	81196321	81196821	*	7	7.86	4.51	3.35	1.2e-14	8.64e-13
chr9	139027098	139027598	*	5.8	6.73	2.51	4.22	1.21e-14	8.68e-13
chr22	36544619	36545119	*	5.75	6.67	2.59	4.08	1.21e-14	8.69e-13
chr17	47999553	48000053	*	5.95	6.9	2.08	4.82	1.24e-14	8.83e-13
chr1	44481871	44482371	*	5.51	6.47	1.1	5.37	1.25e-14	8.88e-13
chr20	61907167	61907667	*	6.65	7.55	3.69	3.86	1.27e-14	9.04e-13
chr18	12062789	12063289	*	7.49	8.39	4.65	3.74	1.27e-14	9.04e-13
chr19	42794023	42794523	*	5.75	6.71	1.54	5.18	1.29e-14	9.16e-13
chr19	59097723	59098223	*	5.77	6.68	2.62	4.07	1.31e-14	9.25e-13
chr22	43511744	43512244	*	5.51	6.48	0.79	5.69	1.32e-14	9.28e-13
chr20	33590496	33590996	*	5.97	6.93	1.86	5.07	1.32e-14	9.28e-13
chr2	42795717	42796217	*	5.94	6.87	2.48	4.4	1.4e-14	9.8e-13
chr11	47374297	47374797	*	5.91	6.9	-0.37	7.27	1.42e-14	9.92e-13
chr1	2852332	2852832	*	5.44	6.39	1.51	4.88	1.48e-14	1.03e-12
chr20	61938651	61939151	*	5.69	6.66	1.03	5.63	1.58e-14	1.1e-12
chr9	131598687	131599187	*	5.57	6.53	1.61	4.92	1.62e-14	1.12e-12
chr9	37422627	37423127	*	5.8	6.73	2.39	4.34	1.67e-14	1.16e-12
chr17	80170895	80171395	*	5.83	6.77	2.32	4.45	1.69e-14	1.17e-12
chr16	1997034	1997534	*	5.66	6.64	0.13	6.51	1.72e-14	1.18e-12
chr8	142379384	142379884	*	6.33	7.23	3.42	3.82	1.72e-14	1.18e-12
chr11	1224568	1225068	*	5.61	6.56	1.91	4.65	1.8e-14	1.24e-12
chr1	9404792	9405292	*	5.49	6.46	0.55	5.91	1.8e-14	1.24e-12
chr9	139877811	139878311	*	7.65	8.51	5.17	3.34	1.83e-14	1.25e-12
chr16	28614652	28615152	*	5.49	6.46	0.77	5.69	1.91e-14	1.31e-12
chr5	6477111	6477611	*	6.88	7.75	4.38	3.36	1.97e-14	1.34e-12
chr11	64121145	64121645	*	7.7	8.62	4.44	4.19	2.03e-14	1.38e-12
chr20	44001659	44002159	*	5.81	6.8	-0.37	7.17	2.05e-14	1.39e-12
chr7	2518201	2518701	*	5.44	6.41	0.83	5.58	2.08e-14	1.41e-12
chr2	47256820	47257320	*	5.37	6.33	1.27	5.06	2.15e-14	1.45e-12
chr8	145049200	145049700	*	5.97	6.96	-0.37	7.32	2.19e-14	1.47e-12
chr3	124498716	124499216	*	6.42	7.29	3.86	3.43	2.22e-14	1.49e-12
chr17	48921501	48922001	*	6.16	7.04	3.53	3.51	2.26e-14	1.51e-12
chr1	226060636	226061136	*	7	7.84	4.75	3.09	2.26e-14	1.51e-12
chr1	204446299	204446799	*	5.69	6.6	2.54	4.06	2.27e-14	1.51e-12
chr11	65367379	65367879	*	5.85	6.79	2.08	4.72	2.27e-14	1.51e-12
chr12	1999647	2000147	*	6.57	7.46	3.83	3.63	2.29e-14	1.52e-12
chr22	46403354	46403854	*	8.13	8.98	5.73	3.25	2.31e-14	1.53e-12
chr16	85490688	85491188	*	6.21	7.12	3.09	4.03	2.33e-14	1.54e-12
chr8	28627705	28628205	*	5.53	6.52	0.13	6.39	2.34e-14	1.54e-12
chr15	78423956	78424456	*	6.4	7.28	3.77	3.51	2.38e-14	1.57e-12
chr17	80183343	80183843	*	7.32	8.18	4.84	3.34	2.42e-14	1.59e-12
chr22	45014076	45014576	*	7.75	8.61	5.29	3.32	2.43e-14	1.59e-12
chr15	45460435	45460935	*	5.65	6.59	1.97	4.62	2.44e-14	1.6e-12
chr16	52438666	52439166	*	5.6	6.55	1.72	4.82	2.51e-14	1.64e-12
chr19	2255686	2256186	*	7.34	8.23	4.54	3.69	2.56e-14	1.67e-12
chr7	5459841	5460341	*	5.38	6.35	1.16	5.18	2.6e-14	1.69e-12
chr20	61874468	61874968	*	6.42	7.3	3.69	3.62	2.64e-14	1.71e-12
chr1	155294386	155294886	*	6.28	7.18	3.3	3.88	2.67e-14	1.73e-12
chr17	79880845	79881345	*	5.8	6.72	2.45	4.27	2.75e-14	1.77e-12
chr19	5805228	5805728	*	6.72	7.61	3.87	3.74	2.76e-14	1.78e-12
chr19	1063726	1064226	*	5.4	6.37	0.76	5.61	2.78e-14	1.79e-12
chr20	60461594	60462094	*	5.97	6.88	2.97	3.91	2.82e-14	1.81e-12
chr17	17584759	17585259	*	8.46	9.33	5.93	3.39	2.86e-14	1.83e-12
chr10	105240437	105240937	*	6.93	7.78	4.6	3.19	2.86e-14	1.83e-12
chr16	1510678	1511178	*	6.65	7.51	4.21	3.31	2.91e-14	1.85e-12
chr15	91519285	91519785	*	5.3	6.26	1.07	5.2	2.91e-14	1.85e-12
chr1	55045732	55046232	*	5.4	6.38	0.31	6.07	2.93e-14	1.86e-12
chr7	2674680	2675180	*	8.5	9.35	6.2	3.15	2.95e-14	1.87e-12
chr8	144417128	144417628	*	8.1	8.96	5.61	3.36	2.98e-14	1.88e-12
chr19	51265206	51265706	*	6.06	7	2.28	4.72	2.99e-14	1.89e-12
chr16	2333066	2333566	*	5.45	6.4	1.63	4.77	3.03e-14	1.91e-12
chr9	140053360	140053860	*	6.07	6.98	3.06	3.92	3.07e-14	1.93e-12
chr1	11583283	11583783	*	6.83	7.71	4.18	3.53	3.09e-14	1.94e-12
chr22	50242826	50243326	*	5.92	6.86	2.37	4.49	3.27e-14	2.04e-12
chr13	114565627	114566127	*	5.89	6.88	-0.37	7.25	3.31e-14	2.07e-12
chr19	49640958	49641458	*	5.5	6.48	0.13	6.35	3.42e-14	2.13e-12
chr5	579767	580267	*	5.96	6.84	3.25	3.59	3.49e-14	2.17e-12
chr20	62197309	62197809	*	5.87	6.86	-0.37	7.23	3.54e-14	2.19e-12
chr15	69591089	69591589	*	5.92	6.88	1.84	5.04	3.66e-14	2.26e-12
chr2	241529685	241530185	*	5.49	6.48	0.01	6.47	3.66e-14	2.26e-12
chr22	24585666	24586166	*	6.32	7.19	3.74	3.45	3.69e-14	2.28e-12
chr14	69726877	69727377	*	7.08	7.95	4.54	3.42	3.79e-14	2.33e-12
chr12	4140711	4141211	*	8.01	8.9	5.3	3.59	3.8e-14	2.33e-12
chr20	2774641	2775141	*	5.86	6.79	2.34	4.46	3.81e-14	2.33e-12
chr19	33891782	33892282	*	5.42	6.36	1.66	4.7	3.81e-14	2.33e-12
chr7	75623487	75623987	*	6.17	7.11	2.65	4.45	3.86e-14	2.36e-12
chr1	2795375	2795875	*	5.37	6.34	0.76	5.58	3.92e-14	2.39e-12
chr16	2391329	2391829	*	9.11	10	6.35	3.65	3.99e-14	2.43e-12
chr19	33667411	33667911	*	5.71	6.67	1.5	5.17	4.16e-14	2.53e-12
chr20	61013092	61013592	*	5.48	6.46	0.3	6.16	4.22e-14	2.55e-12
chr1	22889898	22890398	*	5.74	6.72	0.31	6.41	4.4e-14	2.66e-12
chr1	3396155	3396655	*	7.07	7.92	4.72	3.2	4.51e-14	2.72e-12
chr1	1443699	1444199	*	5.77	6.76	-0.37	7.12	4.54e-14	2.73e-12
chr2	241108931	241109431	*	6.53	7.4	3.97	3.43	4.58e-14	2.75e-12
chr10	104411549	104412049	*	6.54	7.43	3.68	3.75	4.72e-14	2.83e-12
chr2	10573857	10574357	*	7.26	8.14	4.72	3.42	4.77e-14	2.85e-12
chr16	56904807	56905307	*	5.48	6.44	1.1	5.34	4.79e-14	2.86e-12
chr5	542440	542940	*	6.76	7.68	3.62	4.06	4.89e-14	2.91e-12
chr16	88600966	88601466	*	5.91	6.83	2.67	4.16	4.9e-14	2.92e-12
chr7	2668077	2668577	*	5.4	6.37	0.76	5.62	4.98e-14	2.95e-12
chr17	79485830	79486330	*	7.09	7.97	4.49	3.48	4.99e-14	2.95e-12
chr22	20989353	20989853	*	7.03	7.89	4.61	3.28	5.02e-14	2.97e-12
chr9	35792666	35793166	*	5.84	6.77	2.5	4.27	5.18e-14	3.06e-12
chr17	29848334	29848834	*	6.5	7.41	3.4	4.01	5.23e-14	3.08e-12
chr3	52379440	52379940	*	5.44	6.41	0.55	5.86	5.24e-14	3.08e-12
chr2	233303851	233304351	*	8.48	9.36	5.88	3.48	5.33e-14	3.13e-12
chr8	22423422	22423922	*	5.84	6.83	-0.37	7.2	5.34e-14	3.13e-12
chr8	28292282	28292782	*	6.19	7.12	2.89	4.22	5.36e-14	3.13e-12
chr16	87885545	87886045	*	6	6.91	3	3.91	5.44e-14	3.17e-12
chr17	76337237	76337737	*	6.29	7.16	3.72	3.45	5.53e-14	3.22e-12
chr16	1087588	1088088	*	6.28	7.17	3.54	3.63	5.74e-14	3.33e-12
chr4	3486576	3487076	*	6.4	7.29	3.64	3.64	5.83e-14	3.38e-12
chr7	2720307	2720807	*	5.45	6.42	0.9	5.52	5.85e-14	3.38e-12
chr7	98971540	98972040	*	5.43	6.4	0.76	5.64	5.89e-14	3.4e-12
chr1	55446534	55447034	*	6.88	7.78	3.99	3.8	5.92e-14	3.41e-12
chr15	91434746	91435246	*	5.38	6.34	0.95	5.39	5.95e-14	3.43e-12
chr4	56212455	56212955	*	8.46	9.33	5.87	3.46	6.06e-14	3.48e-12
chrX	48911461	48911961	*	6.19	7.15	2.08	5.06	6.13e-14	3.52e-12
chr13	114795146	114795646	*	5.72	6.62	2.72	3.91	6.26e-14	3.58e-12
chrX	47041186	47041686	*	5.47	6.43	1.1	5.33	6.28e-14	3.59e-12
chr3	125775432	125775932	*	7.26	8.12	4.86	3.26	6.31e-14	3.59e-12
chr3	52280185	52280685	*	6.29	7.19	3.42	3.77	6.37e-14	3.62e-12
chr16	5057054	5057554	*	5.6	6.51	2.48	4.04	6.43e-14	3.65e-12
chr9	136856943	136857443	*	5.7	6.61	2.6	4.01	6.57e-14	3.72e-12
chr21	44412207	44412707	*	6.01	6.92	3.05	3.87	6.58e-14	3.72e-12
chr17	47997457	47997957	*	6.46	7.36	3.44	3.93	6.58e-14	3.72e-12
chr8	144297062	144297562	*	6.45	7.39	2.83	4.56	6.68e-14	3.77e-12
chr2	131525514	131526014	*	5.75	6.66	2.62	4.04	6.82e-14	3.84e-12
chr22	50964728	50965228	*	7.33	8.21	4.67	3.54	6.9e-14	3.88e-12
chr19	17359106	17359606	*	6.33	7.26	3.05	4.2	6.91e-14	3.88e-12
chr1	1134667	1135167	*	6.61	7.49	3.93	3.56	7.08e-14	3.96e-12
chr9	140127882	140128382	*	5.34	6.31	0.55	5.77	7.17e-14	4e-12
chr1	181025610	181026110	*	5.77	6.67	2.9	3.77	7.46e-14	4.15e-12
chr20	30522961	30523461	*	5.58	6.51	2.18	4.34	7.6e-14	4.23e-12
chr1	1685045	1685545	*	6.13	7.01	3.53	3.48	7.66e-14	4.25e-12
chr9	129294551	129295051	*	5.29	6.26	0.76	5.5	8.1e-14	4.49e-12
chr16	31340915	31341415	*	5.46	6.41	1.56	4.85	8.12e-14	4.49e-12
chr1	44069873	44070373	*	7.73	8.62	4.98	3.64	8.31e-14	4.59e-12
chr14	69026054	69026554	*	5.66	6.57	2.59	3.98	8.34e-14	4.59e-12
chr19	29583890	29584390	*	5.65	6.56	2.68	3.88	8.38e-14	4.61e-12
chr2	176045642	176046142	*	5.79	6.7	2.8	3.89	8.42e-14	4.63e-12
chr11	76902962	76903462	*	6.22	7.11	3.47	3.64	8.5e-14	4.66e-12
chr11	70416225	70416725	*	5.42	6.38	1.1	5.28	8.57e-14	4.68e-12
chr8	145655241	145655741	*	7.92	8.78	5.44	3.34	8.58e-14	4.68e-12
chr20	43945969	43946469	*	5.3	6.26	0.94	5.32	8.67e-14	4.72e-12
chr11	47373378	47373878	*	6.02	6.96	2.28	4.68	8.72e-14	4.74e-12
chr22	37139622	37140122	*	7.64	8.48	5.38	3.11	8.82e-14	4.79e-12
chr14	104166157	104166657	*	5.89	6.78	3.01	3.77	9.13e-14	4.95e-12
chr5	1163936	1164436	*	5.72	6.71	-0.37	7.07	9.2e-14	4.98e-12
chr15	78181709	78182209	*	6.12	7.03	3.03	4	9.25e-14	5e-12
chr7	101957631	101958131	*	7.53	8.41	4.81	3.6	9.46e-14	5.1e-12
chr8	144950022	144950522	*	6.98	7.83	4.62	3.21	9.55e-14	5.14e-12
chr12	131500943	131501443	*	6.11	7.04	2.6	4.45	9.63e-14	5.18e-12
chr8	143654266	143654766	*	7.25	8.13	4.59	3.54	9.65e-14	5.18e-12
chr4	2364762	2365262	*	5.47	6.41	1.99	4.42	9.67e-14	5.18e-12
chr15	42173257	42173757	*	5.71	6.62	2.68	3.94	9.69e-14	5.18e-12
chr5	1837502	1838002	*	7.83	8.67	5.55	3.13	9.81e-14	5.23e-12
chr19	49971901	49972401	*	5.41	6.39	0.01	6.39	1.03e-13	5.47e-12
chr9	137363717	137364217	*	5.67	6.66	-0.37	7.02	1.05e-13	5.57e-12
chr19	10532467	10532967	*	6.15	7.07	2.92	4.14	1.06e-13	5.65e-12
chr16	86539729	86540229	*	5.67	6.58	2.6	3.98	1.12e-13	5.95e-12
chr7	158031182	158031682	*	5.36	6.34	0.3	6.04	1.13e-13	5.96e-12
chr8	131028814	131029314	*	6.02	6.92	3.08	3.83	1.13e-13	5.97e-12
chr7	55878221	55878721	*	5.61	6.54	2.3	4.24	1.14e-13	5.99e-12
chr20	61714917	61715417	*	5.34	6.3	0.95	5.35	1.18e-13	6.23e-12
chr22	35706068	35706568	*	5.7	6.64	2.05	4.59	1.19e-13	6.25e-12
chr20	31211495	31211995	*	6.39	7.32	2.92	4.41	1.19e-13	6.25e-12
chr17	19312389	19312889	*	6.47	7.33	3.95	3.39	1.2e-13	6.26e-12
chr20	57617321	57617821	*	6.67	7.56	4.01	3.55	1.21e-13	6.31e-12
chr1	16515857	16516357	*	5.31	6.27	1.03	5.24	1.21e-13	6.31e-12
chr16	11680372	11680872	*	5.32	6.29	0.55	5.74	1.25e-13	6.49e-12
chr1	27886913	27887413	*	6.66	7.56	3.85	3.71	1.25e-13	6.5e-12
chr8	144945147	144945647	*	5.23	6.2	0.76	5.44	1.25e-13	6.51e-12
chr17	26826754	26827254	*	5.99	6.89	3.1	3.79	1.27e-13	6.57e-12
chr22	45341502	45342002	*	5.94	6.84	3.07	3.77	1.34e-13	6.93e-12
chr1	156086931	156087431	*	5.89	6.85	1.73	5.12	1.35e-13	6.95e-12
chr20	60941675	60942175	*	5.85	6.84	-0.37	7.2	1.36e-13	7e-12
chr20	57284462	57284962	*	6.33	7.2	3.76	3.44	1.36e-13	7e-12
chr17	78217623	78218123	*	6.41	7.29	3.76	3.53	1.36e-13	7e-12
chr22	41813915	41814415	*	5.91	6.81	3.08	3.73	1.38e-13	7.08e-12
chr1	17278426	17278926	*	7	7.94	3.4	4.54	1.38e-13	7.08e-12
chr10	5570787	5571287	*	5.3	6.25	1.45	4.8	1.39e-13	7.1e-12
chr22	50726156	50726656	*	5.64	6.63	-0.37	7	1.4e-13	7.15e-12
chr10	1618145	1618645	*	5.46	6.42	1.42	5	1.42e-13	7.21e-12
chr11	65787942	65788442	*	5.5	6.42	2.37	4.04	1.45e-13	7.35e-12
chr8	142241156	142241656	*	6.13	7.02	3.39	3.63	1.49e-13	7.57e-12
chr21	45726211	45726711	*	5.91	6.85	2.48	4.36	1.54e-13	7.81e-12
chr20	61086200	61086700	*	6.95	7.82	4.41	3.41	1.55e-13	7.85e-12
chr1	203052557	203053057	*	6.81	7.7	4.05	3.65	1.6e-13	8.09e-12
chr1	202021889	202022389	*	5.54	6.49	1.57	4.93	1.62e-13	8.15e-12
chr2	121955057	121955557	*	6.55	7.4	4.19	3.21	1.65e-13	8.29e-12
chr15	31619790	31620290	*	6.67	7.54	4.15	3.39	1.66e-13	8.36e-12
chr8	142195027	142195527	*	5.68	6.67	-0.37	7.04	1.67e-13	8.36e-12
chr19	292363	292863	*	5.78	6.69	2.73	3.96	1.69e-13	8.44e-12
chr12	96184571	96185071	*	7.12	7.96	4.9	3.07	1.69e-13	8.45e-12
chr19	995945	996445	*	5.87	6.77	2.87	3.91	1.69e-13	8.45e-12
chr20	62070206	62070706	*	6.05	6.98	2.6	4.38	1.7e-13	8.46e-12
chr2	233306632	233307132	*	5.58	6.56	-0.37	6.93	1.74e-13	8.64e-12
chr16	85176952	85177452	*	5.23	6.21	0.4	5.8	1.76e-13	8.75e-12
chr7	98968722	98969222	*	5.63	6.62	-0.37	6.99	1.78e-13	8.8e-12
chr20	62284170	62284670	*	5.39	6.34	1.67	4.67	1.79e-13	8.87e-12
chr1	150521981	150522481	*	8.32	9.16	6.01	3.15	1.89e-13	9.32e-12
chr3	65793674	65794174	*	5.38	6.34	1.48	4.85	1.92e-13	9.46e-12
chr2	1512967	1513467	*	7.93	8.78	5.6	3.18	1.92e-13	9.47e-12
chr17	73615644	73616144	*	5.39	6.32	1.94	4.38	1.96e-13	9.63e-12
chr16	88919888	88920388	*	5.91	6.8	3.13	3.68	1.98e-13	9.71e-12
chr15	74658109	74658609	*	6.24	7.12	3.53	3.59	2e-13	9.82e-12
chr22	50629527	50630027	*	5.49	6.42	2.02	4.4	2.02e-13	9.87e-12
chr10	134953370	134953870	*	5.67	6.58	2.61	3.96	2.02e-13	9.87e-12
chr5	131725523	131726023	*	5.86	6.76	2.87	3.9	2.03e-13	9.89e-12
chr11	68777785	68778285	*	5.77	6.7	2.28	4.42	2.03e-13	9.89e-12
chr1	44483780	44484280	*	5.52	6.43	2.35	4.08	2.03e-13	9.89e-12
chr19	4063100	4063600	*	5.86	6.8	2.39	4.41	2.04e-13	9.92e-12
chr1	16357033	16357533	*	5.47	6.42	1.69	4.73	2.07e-13	1e-11
chr2	120301954	120302454	*	7.57	8.46	4.76	3.7	2.1e-13	1.02e-11
chr19	10544023	10544523	*	5.25	6.23	0.31	5.92	2.11e-13	1.02e-11
chr1	3274344	3274844	*	6.61	7.48	4.07	3.41	2.14e-13	1.03e-11
chr1	228250007	228250507	*	5.74	6.66	2.63	4.03	2.17e-13	1.05e-11
chr12	42631293	42631793	*	5.77	6.72	2.13	4.58	2.21e-13	1.06e-11
chr20	2741312	2741812	*	5.76	6.67	2.7	3.97	2.21e-13	1.06e-11
chr1	156039888	156040388	*	5.6	6.53	2.23	4.3	2.24e-13	1.07e-11
chr3	48613923	48614423	*	5.83	6.75	2.49	4.27	2.33e-13	1.11e-11
chr1	19638832	19639332	*	6.44	7.37	3.05	4.32	2.33e-13	1.11e-11
chr6	143857984	143858484	*	6.22	7.12	3.44	3.67	2.33e-13	1.11e-11
chr20	61997901	61998401	*	7.48	8.36	4.75	3.61	2.34e-13	1.11e-11
chr9	139746314	139746814	*	6.57	7.42	4.25	3.17	2.43e-13	1.16e-11
chr16	67574575	67575075	*	6.35	7.23	3.76	3.47	2.47e-13	1.17e-11
chr10	43789868	43790368	*	8.12	9.04	5.02	4.02	2.5e-13	1.18e-11
chr20	62473119	62473619	*	5.48	6.43	1.5	4.93	2.58e-13	1.22e-11
chr7	100047997	100048497	*	6.03	6.93	3.03	3.9	2.6e-13	1.23e-11
chr11	119218259	119218759	*	5.94	6.82	3.32	3.49	2.62e-13	1.23e-11
chr17	60704879	60705379	*	6.21	7.14	2.7	4.44	2.62e-13	1.24e-11
chr20	31869827	31870327	*	6.45	7.3	4.17	3.12	2.67e-13	1.26e-11
chr14	103009584	103010084	*	6.48	7.35	3.93	3.41	2.71e-13	1.27e-11
chr22	43119165	43119665	*	5.6	6.53	2.26	4.27	2.71e-13	1.27e-11
chr16	70717276	70717776	*	6.4	7.26	4.02	3.24	2.74e-13	1.28e-11
chr9	130511792	130512292	*	6.85	7.69	4.63	3.06	2.76e-13	1.29e-11
chr19	17735157	17735657	*	6.25	7.13	3.62	3.5	2.78e-13	1.3e-11
chr21	45558520	45559020	*	5.54	6.52	-0.37	6.89	2.82e-13	1.31e-11
chr5	1654938	1655438	*	5.32	6.28	1.39	4.89	2.82e-13	1.31e-11
chr19	51534467	51534967	*	6	6.9	3.1	3.8	2.94e-13	1.36e-11
chr9	130706874	130707374	*	6.34	7.27	2.88	4.39	2.97e-13	1.38e-11
chr22	28175673	28176173	*	7.77	8.59	5.66	2.92	2.99e-13	1.39e-11
chr3	184287611	184288111	*	5.33	6.31	0.13	6.18	3.05e-13	1.41e-11
chr9	136358977	136359477	*	7.3	8.2	4.45	3.74	3.09e-13	1.43e-11
chr19	5056586	5057086	*	5.71	6.66	1.82	4.84	3.13e-13	1.44e-11
chr4	1757219	1757719	*	5.22	6.19	0.76	5.43	3.16e-13	1.45e-11
chr7	2538848	2539348	*	5.61	6.6	-0.37	6.96	3.18e-13	1.46e-11
chr5	180621433	180621933	*	5.24	6.21	0.56	5.66	3.19e-13	1.46e-11
chr1	111742513	111743013	*	5.23	6.19	1.22	4.96	3.25e-13	1.49e-11
chr20	30457787	30458287	*	6.01	6.91	3.07	3.84	3.29e-13	1.5e-11
chr1	36795327	36795827	*	7.35	8.23	4.76	3.47	3.33e-13	1.52e-11
chr1	205274050	205274550	*	5.21	6.19	0.31	5.88	3.36e-13	1.53e-11
chr19	35222146	35222646	*	5.49	6.43	1.84	4.58	3.38e-13	1.54e-11
chr11	3149932	3150432	*	5.49	6.41	2.13	4.29	3.38e-13	1.54e-11
chr16	733771	734271	*	6.72	7.58	4.34	3.23	3.46e-13	1.57e-11
chr15	63101424	63101924	*	6.06	7	2.43	4.57	3.47e-13	1.57e-11
chr3	50585177	50585677	*	5.31	6.23	2.04	4.19	3.47e-13	1.57e-11
chr21	45579946	45580446	*	7.92	8.76	5.67	3.09	3.49e-13	1.58e-11
chr22	26430048	26430548	*	6.04	6.94	3.16	3.78	3.49e-13	1.58e-11
chr1	11765331	11765831	*	5.35	6.31	1.1	5.21	3.5e-13	1.58e-11
chr17	1507492	1507992	*	5.42	6.38	1.1	5.28	3.56e-13	1.6e-11
chr7	1685099	1685599	*	5.66	6.65	-0.37	7.02	3.72e-13	1.67e-11
chr16	70775592	70776092	*	6.39	7.26	3.8	3.47	3.77e-13	1.69e-11
chr22	39658124	39658624	*	6.55	7.42	4.08	3.33	3.78e-13	1.69e-11
chr8	101322357	101322857	*	6.11	7.04	2.76	4.28	3.8e-13	1.7e-11
chr18	11520876	11521376	*	7.37	8.22	4.96	3.26	3.82e-13	1.71e-11
chr12	132325506	132326006	*	5.59	6.51	2.43	4.08	3.83e-13	1.71e-11
chr17	41753918	41754418	*	5.76	6.67	2.62	4.05	3.85e-13	1.71e-11
chr22	37852247	37852747	*	5.4	6.32	2.05	4.27	3.88e-13	1.72e-11
chr1	11786480	11786980	*	5.53	6.52	-0.37	6.88	3.94e-13	1.75e-11
chr16	30101506	30102006	*	6.38	7.28	3.6	3.68	4.03e-13	1.79e-11
chr19	35762295	35762795	*	5.64	6.53	2.83	3.7	4.08e-13	1.8e-11
chr7	66133814	66134314	*	5.53	6.47	1.97	4.49	4.31e-13	1.9e-11
chr22	50012353	50012853	*	6.64	7.54	3.79	3.75	4.33e-13	1.91e-11
chr9	101558348	101558848	*	5.78	6.71	2.45	4.26	4.52e-13	1.99e-11
chr2	1480648	1481148	*	5.23	6.19	1.03	5.16	4.57e-13	2.01e-11
chr17	73556013	73556513	*	6.88	7.79	3.72	4.08	4.63e-13	2.04e-11
chr22	40077538	40078038	*	7.53	8.36	5.35	3.01	4.66e-13	2.05e-11
chr22	22336271	22336771	*	5.32	6.3	0.13	6.17	4.75e-13	2.08e-11
chr19	56047262	56047762	*	6.61	7.46	4.28	3.18	4.75e-13	2.08e-11
chr9	140075744	140076244	*	5.68	6.58	2.8	3.78	4.84e-13	2.11e-11
chr5	178420803	178421303	*	5.47	6.46	-0.37	6.82	4.87e-13	2.12e-11
chr1	31906330	31906830	*	7.15	8.03	4.44	3.59	4.92e-13	2.14e-11
chr8	142441555	142442055	*	6.15	7.07	3	4.07	4.93e-13	2.15e-11
chr22	38329164	38329664	*	5.52	6.51	-0.37	6.87	5.01e-13	2.18e-11
chr1	3278290	3278790	*	6.19	7.1	3.08	4.02	5.03e-13	2.18e-11
chr1	2158300	2158800	*	5.44	6.39	1.62	4.77	5.03e-13	2.18e-11
chr3	52551872	52552372	*	6.8	7.73	3.35	4.38	5.06e-13	2.19e-11
chr2	134877602	134878102	*	6.3	7.19	3.51	3.68	5.07e-13	2.19e-11
chr19	40900495	40900995	*	5.94	6.88	2.32	4.56	5.08e-13	2.19e-11
chr15	68125874	68126374	*	7.55	8.39	5.27	3.11	5.09e-13	2.19e-11
chr2	242695217	242695717	*	7.22	8.07	4.82	3.25	5.13e-13	2.21e-11
chr20	36030992	36031492	*	6.08	6.95	3.53	3.42	5.17e-13	2.22e-11
chr19	19173936	19174436	*	5.56	6.5	1.97	4.52	5.24e-13	2.25e-11
chr20	44455638	44456138	*	5.99	6.9	3.03	3.87	5.26e-13	2.25e-11
chr6	31239488	31239988	*	6.16	7.1	2.75	4.35	5.41e-13	2.31e-11
chr10	551302	551802	*	5.2	6.15	1.25	4.9	5.45e-13	2.33e-11
chr15	91454271	91454771	*	5.42	6.35	2.06	4.3	5.49e-13	2.34e-11
chr16	2337903	2338403	*	6.46	7.36	3.57	3.79	5.5e-13	2.34e-11
chr12	6371215	6371715	*	5.73	6.66	2.47	4.19	5.51e-13	2.34e-11
chr11	67777899	67778399	*	6.93	7.79	4.58	3.2	5.6e-13	2.38e-11
chr15	66902484	66902984	*	6.53	7.39	4.17	3.21	5.62e-13	2.38e-11
chr14	24530548	24531048	*	5.9	6.81	2.95	3.85	5.64e-13	2.39e-11
chr17	73835791	73836291	*	5.59	6.54	1.72	4.82	5.7e-13	2.41e-11
chr8	142956282	142956782	*	5.34	6.3	1.24	5.06	5.79e-13	2.44e-11
chr10	73625593	73626093	*	6.83	7.75	3.53	4.22	5.93e-13	2.5e-11
chr7	89950023	89950523	*	7.44	8.26	5.35	2.91	6.04e-13	2.54e-11
chr16	70692818	70693318	*	5.67	6.62	1.72	4.9	6.04e-13	2.54e-11
chr11	64677458	64677958	*	5.6	6.59	-0.37	6.95	6.06e-13	2.55e-11
chr1	33361024	33361524	*	5.44	6.38	1.73	4.65	6.07e-13	2.55e-11
chr9	95876505	95877005	*	5.81	6.71	2.86	3.85	6.09e-13	2.55e-11
chr6	169391965	169392465	*	5.28	6.22	1.62	4.6	6.1e-13	2.55e-11
chr17	26863996	26864496	*	6.7	7.55	4.38	3.17	6.13e-13	2.56e-11
chr7	45721204	45721704	*	5.44	6.43	-0.37	6.79	6.17e-13	2.57e-11
chr17	39915800	39916300	*	5.48	6.43	1.58	4.85	6.21e-13	2.58e-11
chr9	139748065	139748565	*	6.34	7.22	3.71	3.51	6.26e-13	2.6e-11
chr20	61647488	61647988	*	5.34	6.3	1.25	5.05	6.32e-13	2.62e-11
chr17	61623769	61624269	*	5.55	6.45	2.6	3.85	6.33e-13	2.62e-11
chr16	81812835	81813335	*	5.38	6.33	1.65	4.68	6.33e-13	2.62e-11
chr1	150527018	150527518	*	7.16	8.06	4.34	3.72	6.33e-13	2.62e-11
chr14	104899601	104900101	*	5.13	6.1	0.55	5.55	6.34e-13	2.62e-11
chr22	50193298	50193798	*	5.76	6.66	2.84	3.82	6.43e-13	2.65e-11
chr22	38699134	38699634	*	7.96	8.83	5.43	3.39	6.52e-13	2.69e-11
chr4	1765216	1765716	*	6.82	7.68	4.32	3.36	6.53e-13	2.69e-11
chr20	61449971	61450471	*	5.37	6.33	1.24	5.09	6.58e-13	2.7e-11
chr8	142365248	142365748	*	6.52	7.44	3.14	4.3	6.78e-13	2.78e-11
chr17	73839872	73840372	*	5.84	6.8	1.91	4.88	7.06e-13	2.89e-11
chr2	133014595	133015095	*	6.3	7.19	3.62	3.57	7.09e-13	2.9e-11
chr1	227651673	227652173	*	5.73	6.62	3.01	3.61	7.16e-13	2.92e-11
chr7	98898932	98899432	*	6.34	7.23	3.57	3.66	7.17e-13	2.93e-11
chr10	133450859	133451359	*	5.6	6.5	2.56	3.94	7.22e-13	2.94e-11
chr22	20252143	20252643	*	8.41	9.25	6.11	3.14	7.23e-13	2.94e-11
chr22	19863759	19864259	*	5.47	6.46	-0.37	6.82	7.23e-13	2.94e-11
chr8	63161591	63162091	*	6.28	7.18	3.42	3.76	7.44e-13	3.02e-11
chr12	132060863	132061363	*	6.61	7.48	4.03	3.45	7.62e-13	3.09e-11
chr2	241949763	241950263	*	6.51	7.37	4.01	3.37	7.78e-13	3.15e-11
chr4	2073441	2073941	*	6.22	7.08	3.77	3.31	7.96e-13	3.22e-11
chr22	46392124	46392624	*	7.88	8.73	5.55	3.18	7.98e-13	3.22e-11
chr15	66937234	66937734	*	5.44	6.42	-0.37	6.79	8e-13	3.22e-11
chr19	42512224	42512724	*	5.11	6.08	0.77	5.31	8e-13	3.22e-11
chr16	1508217	1508717	*	5.65	6.58	2.3	4.28	8.02e-13	3.23e-11
chr19	18063611	18064111	*	5.12	6.07	1.3	4.77	8.05e-13	3.23e-11
chr22	38624994	38625494	*	7.33	8.23	4.36	3.87	8.1e-13	3.25e-11
chr17	42856402	42856902	*	5.29	6.23	1.67	4.56	8.26e-13	3.31e-11
chr3	48715958	48716458	*	5.24	6.17	1.89	4.28	8.34e-13	3.33e-11
chr12	113826082	113826582	*	6.64	7.51	4.13	3.38	8.35e-13	3.33e-11
chr8	144342585	144343085	*	8.59	9.49	5.71	3.78	8.37e-13	3.34e-11
chr4	8616668	8617168	*	6.38	7.25	3.88	3.37	8.42e-13	3.35e-11
chr15	85490045	85490545	*	7.23	8.08	4.88	3.2	8.47e-13	3.37e-11
chr11	63975574	63976074	*	7.86	8.71	5.54	3.17	8.5e-13	3.38e-11
chr8	69244325	69244825	*	5.12	6.08	0.79	5.29	8.83e-13	3.5e-11
chr3	186317214	186317714	*	5.61	6.56	1.73	4.82	8.86e-13	3.51e-11
chr19	11565494	11565994	*	5.47	6.42	1.58	4.84	8.95e-13	3.54e-11
chr16	89119516	89120016	*	5.25	6.2	1.5	4.7	9.05e-13	3.58e-11
chr12	668713	669213	*	5.43	6.38	1.5	4.88	9.06e-13	3.58e-11
chr22	49484590	49485090	*	5.43	6.42	-0.37	6.79	9.1e-13	3.59e-11
chr22	19564043	19564543	*	6.91	7.78	4.42	3.36	9.16e-13	3.6e-11
chr19	48113134	48113634	*	5.91	6.82	2.75	4.07	9.18e-13	3.61e-11
chr16	32347886	32348386	*	6.13	7.04	2.98	4.06	9.18e-13	3.61e-11
chr20	61592417	61592917	*	5.23	6.18	1.31	4.87	9.22e-13	3.61e-11
chr15	69590243	69590743	*	5.43	6.39	1.42	4.97	9.22e-13	3.61e-11
chr8	142345832	142346332	*	5.85	6.77	2.58	4.19	9.3e-13	3.63e-11
chr14	65512720	65513220	*	5.58	6.57	-0.37	6.94	9.3e-13	3.63e-11
chr4	7457202	7457702	*	7.1	7.97	4.61	3.35	9.31e-13	3.63e-11
chr22	20195200	20195700	*	7.93	8.79	5.46	3.33	9.38e-13	3.65e-11
chr1	22221339	22221839	*	5.62	6.53	2.67	3.86	9.64e-13	3.75e-11
chr15	64724497	64724997	*	6.56	7.43	4	3.43	9.72e-13	3.78e-11
chr16	608431	608931	*	5.47	6.41	1.91	4.5	1.01e-12	3.9e-11
chr2	233195601	233196101	*	6.36	7.22	3.92	3.3	1.02e-12	3.94e-11
chr11	65793952	65794452	*	6.04	6.94	3.18	3.76	1.04e-12	4.01e-11
chr22	39778814	39779314	*	6.7	7.57	4.11	3.46	1.05e-12	4.06e-11
chr22	21261642	21262142	*	5.11	6.08	0.56	5.53	1.06e-12	4.11e-11
chr1	1617910	1618410	*	5.45	6.43	-0.37	6.8	1.07e-12	4.11e-11
chr12	122278207	122278707	*	5.12	6.09	0.83	5.25	1.07e-12	4.12e-11
chr20	44642528	44643028	*	5.2	6.18	0.01	6.17	1.07e-12	4.12e-11
chr5	180015473	180015973	*	5.27	6.2	1.96	4.24	1.09e-12	4.17e-11
chr19	1155172	1155672	*	5.52	6.48	1.25	5.24	1.1e-12	4.22e-11
chr11	67044532	67045032	*	6.27	7.14	3.68	3.46	1.11e-12	4.25e-11
chr11	73365855	73366355	*	7.27	8.12	4.94	3.18	1.12e-12	4.28e-11
chr3	50610435	50610935	*	5.42	6.41	-0.37	6.77	1.13e-12	4.31e-11
chr17	19618425	19618925	*	7.68	8.52	5.38	3.15	1.14e-12	4.34e-11
chr10	74014700	74015200	*	6.9	7.77	4.3	3.47	1.14e-12	4.35e-11
chr11	36531106	36531606	*	6.48	7.36	3.88	3.48	1.15e-12	4.37e-11
chr5	139169617	139170117	*	5.98	6.9	2.67	4.23	1.18e-12	4.47e-11
chr20	3654120	3654620	*	5.46	6.41	1.5	4.91	1.2e-12	4.57e-11
chr22	50748618	50749118	*	5.72	6.64	2.54	4.09	1.21e-12	4.6e-11
chr20	35984330	35984830	*	7.18	8.1	4.04	4.05	1.22e-12	4.62e-11
chr2	2649294	2649794	*	6.64	7.5	4.19	3.31	1.24e-12	4.68e-11
chr12	115105114	115105614	*	5.95	6.83	3.3	3.53	1.26e-12	4.75e-11
chr22	45283818	45284318	*	5.82	6.7	3.11	3.59	1.27e-12	4.78e-11
chr20	33863699	33864199	*	6.6	7.45	4.29	3.16	1.3e-12	4.91e-11
chr15	100289952	100290452	*	6.5	7.36	4	3.36	1.31e-12	4.92e-11
chr11	1716894	1717394	*	5.15	6.11	0.77	5.35	1.35e-12	5.05e-11
chr10	134021348	134021848	*	5.34	6.29	1.54	4.75	1.35e-12	5.05e-11
chr22	45825734	45826234	*	7.42	8.32	4.5	3.82	1.35e-12	5.08e-11
chr10	134681351	134681851	*	5.3	6.23	1.97	4.26	1.38e-12	5.18e-11
chr8	144647967	144648467	*	6.09	6.99	3.2	3.79	1.4e-12	5.23e-11
chr22	50349262	50349762	*	7.96	8.82	5.47	3.35	1.4e-12	5.23e-11
chr4	7257419	7257919	*	5.27	6.22	1.5	4.72	1.41e-12	5.25e-11
chr1	178971915	178972415	*	5.69	6.62	2.42	4.19	1.41e-12	5.27e-11
chr1	142657805	142658305	*	7.03	7.87	4.77	3.1	1.44e-12	5.36e-11
chr3	126984151	126984651	*	5.84	6.73	3.08	3.64	1.44e-12	5.37e-11
chr11	64023631	64024131	*	5.74	6.62	3.1	3.53	1.45e-12	5.4e-11
chr19	17988420	17988920	*	5.22	6.17	1.25	4.92	1.46e-12	5.42e-11
chr16	2258757	2259257	*	7.15	8.01	4.76	3.25	1.49e-12	5.51e-11
chr22	25678799	25679299	*	6.87	7.73	4.46	3.27	1.53e-12	5.64e-11
chr11	67396940	67397440	*	6.38	7.24	3.89	3.36	1.53e-12	5.64e-11
chr19	1028709	1029209	*	5.46	6.41	1.45	4.96	1.54e-12	5.69e-11
chr16	715964	716464	*	5.87	6.8	2.37	4.43	1.55e-12	5.7e-11
chr2	233232041	233232541	*	6.59	7.45	4.1	3.36	1.55e-12	5.7e-11
chr14	74485517	74486017	*	5.87	6.82	1.81	5.01	1.56e-12	5.72e-11
chr15	57887589	57888089	*	6.45	7.29	4.15	3.14	1.56e-12	5.73e-11
chr9	130631531	130632031	*	7.68	8.54	5.24	3.29	1.57e-12	5.75e-11
chr17	79951201	79951701	*	6.37	7.27	3.41	3.87	1.58e-12	5.79e-11
chr19	42767545	42768045	*	5.24	6.19	1.18	5.01	1.59e-12	5.8e-11
chr13	114214568	114215068	*	5.46	6.41	1.38	5.03	1.6e-12	5.83e-11
chr16	32351117	32351617	*	8.28	9.1	6.12	2.99	1.61e-12	5.87e-11
chr10	124395840	124396340	*	5.55	6.47	2.2	4.28	1.62e-12	5.9e-11
chr20	61056296	61056796	*	5.31	6.23	2.13	4.09	1.62e-12	5.9e-11
chr8	144294577	144295077	*	5.82	6.77	1.92	4.85	1.64e-12	5.97e-11
chr10	71616816	71617316	*	6.95	7.83	4.26	3.58	1.66e-12	6.03e-11
chr20	31897350	31897850	*	5.08	6.04	0.77	5.27	1.66e-12	6.03e-11
chr15	90371577	90372077	*	6.42	7.27	4.11	3.16	1.67e-12	6.04e-11
chr17	38170093	38170593	*	6.75	7.64	3.93	3.71	1.67e-12	6.04e-11
chr22	45625864	45626364	*	5.92	6.82	3.09	3.73	1.69e-12	6.12e-11
chr11	60692127	60692627	*	7.58	8.44	5.22	3.22	1.7e-12	6.13e-11
chr7	1490072	1490572	*	8.33	9.19	5.94	3.24	1.71e-12	6.16e-11
chr11	63901399	63901899	*	6.63	7.49	4.24	3.24	1.74e-12	6.28e-11
chr5	180073870	180074370	*	6.5	7.34	4.25	3.09	1.75e-12	6.29e-11
chr11	1263332	1263832	*	5.99	6.87	3.41	3.45	1.77e-12	6.37e-11
chr22	23792512	23793012	*	5.78	6.67	3.02	3.66	1.77e-12	6.37e-11
chr2	241658808	241659308	*	7.55	8.44	4.86	3.58	1.78e-12	6.39e-11
chr14	101929936	101930436	*	5.16	6.08	1.92	4.15	1.82e-12	6.52e-11
chr7	73388679	73389179	*	5.47	6.38	2.39	3.99	1.83e-12	6.55e-11
chr20	61037149	61037649	*	5.31	6.26	1.24	5.03	1.86e-12	6.63e-11
chr15	68122182	68122682	*	5.88	6.79	2.75	4.04	1.87e-12	6.67e-11
chr17	1493443	1493943	*	5.82	6.71	3.07	3.64	1.87e-12	6.67e-11
chr7	158203372	158203872	*	6.05	6.92	3.46	3.47	1.88e-12	6.69e-11
chr22	37396683	37397183	*	5.18	6.12	1.51	4.61	1.89e-12	6.72e-11
chr16	85346750	85347250	*	7.19	8.09	4.27	3.82	1.89e-12	6.73e-11
chr11	69635105	69635605	*	6.4	7.33	3.01	4.32	1.9e-12	6.74e-11
chr17	73545393	73545893	*	6.62	7.47	4.3	3.17	1.93e-12	6.85e-11
chr17	73887795	73888295	*	5.37	6.32	1.51	4.8	1.95e-12	6.9e-11
chr20	31187796	31188296	*	5.25	6.18	1.73	4.45	1.96e-12	6.93e-11
chr2	128392831	128393331	*	5.23	6.19	1.1	5.09	1.97e-12	6.94e-11
chr6	169777560	169778060	*	5.61	6.5	2.85	3.65	1.97e-12	6.96e-11
chr22	30141144	30141644	*	5.96	6.84	3.28	3.56	1.99e-12	7e-11
chr22	35695244	35695744	*	6.86	7.72	4.46	3.26	2e-12	7.02e-11
chr20	61346531	61347031	*	5.34	6.28	1.91	4.37	2.08e-12	7.32e-11
chr3	184074952	184075452	*	6.25	7.09	3.96	3.14	2.1e-12	7.36e-11
chr11	67804009	67804509	*	6.07	6.95	3.42	3.53	2.11e-12	7.41e-11
chr4	39529359	39529859	*	6.53	7.44	3.5	3.94	2.14e-12	7.48e-11
chr6	33645297	33645797	*	8.55	9.42	5.91	3.52	2.14e-12	7.49e-11
chr15	57833489	57833989	*	5.38	6.32	1.91	4.41	2.14e-12	7.49e-11
chr17	79761802	79762302	*	6.13	6.99	3.75	3.24	2.17e-12	7.57e-11
chr20	60899427	60899927	*	5.39	6.34	1.5	4.84	2.18e-12	7.61e-11
chr21	46928677	46929177	*	6.46	7.35	3.76	3.59	2.23e-12	7.77e-11
chr8	143676555	143677055	*	5.95	6.87	2.7	4.17	2.31e-12	8.03e-11
chr10	134858180	134858680	*	6.48	7.32	4.17	3.15	2.32e-12	8.04e-11
chr15	65108674	65109174	*	7.71	8.57	5.32	3.24	2.33e-12	8.08e-11
chr22	44614021	44614521	*	5.36	6.27	2.4	3.87	2.36e-12	8.16e-11
chr20	61374926	61375426	*	5.48	6.46	-0.37	6.83	2.38e-12	8.23e-11
chr11	776654	777154	*	5.17	6.14	0.5	5.64	2.39e-12	8.26e-11
chr1	27434175	27434675	*	5.18	6.1	1.98	4.12	2.44e-12	8.43e-11
chr17	48190798	48191298	*	7.67	8.51	5.43	3.08	2.44e-12	8.43e-11
chr3	48599739	48600239	*	6.37	7.24	3.82	3.43	2.46e-12	8.48e-11
chr16	89002518	89003018	*	5.67	6.57	2.76	3.81	2.47e-12	8.49e-11
chr22	46401675	46402175	*	6.5	7.37	3.91	3.46	2.47e-12	8.49e-11
chr20	46611619	46612119	*	5.54	6.47	2.11	4.36	2.48e-12	8.53e-11
chr17	32906987	32907487	*	5.05	6.02	0.31	5.71	2.5e-12	8.58e-11
chr18	12376667	12377167	*	5.14	6.12	0.01	6.11	2.55e-12	8.75e-11
chr4	3937922	3938422	*	5.34	6.33	-0.37	6.69	2.56e-12	8.75e-11
chr20	62685445	62685945	*	5.43	6.42	-0.37	6.78	2.56e-12	8.76e-11
chr16	1792165	1792665	*	5.89	6.79	2.91	3.88	2.57e-12	8.78e-11
chr2	233321515	233322015	*	6.25	7.17	2.92	4.26	2.61e-12	8.9e-11
chr10	134269833	134270333	*	5.17	6.12	1.48	4.64	2.62e-12	8.93e-11
chr22	31276830	31277330	*	5.08	6.04	0.94	5.1	2.63e-12	8.93e-11
chrX	149010156	149010656	*	5.48	6.41	2.05	4.36	2.66e-12	9.04e-11
chr19	16124306	16124806	*	6.83	7.68	4.48	3.2	2.71e-12	9.21e-11
chr17	37819199	37819699	*	5.85	6.76	2.83	3.93	2.76e-12	9.37e-11
chr7	101245761	101246261	*	5.88	6.79	2.83	3.97	2.77e-12	9.4e-11
chr2	241402832	241403332	*	5.61	6.53	2.39	4.14	2.83e-12	9.59e-11
chr16	777300	777800	*	5.1	6.07	0.76	5.31	2.84e-12	9.59e-11
chr11	553298	553798	*	5.25	6.18	1.71	4.47	2.84e-12	9.59e-11
chr18	77153626	77154126	*	7.39	8.24	5.07	3.17	2.86e-12	9.65e-11
chr22	45015944	45016444	*	6.25	7.1	3.93	3.17	2.89e-12	9.72e-11
chr5	176516820	176517320	*	5.14	6.11	0.5	5.62	2.91e-12	9.81e-11
chr19	1166740	1167240	*	5.87	6.77	2.87	3.9	2.94e-12	9.89e-11
chr15	74626727	74627227	*	4.99	5.95	0.56	5.4	2.97e-12	9.97e-11
chr22	19697923	19698423	*	7.49	8.37	4.87	3.5	3.04e-12	1.02e-10
chr12	133050953	133051453	*	5.11	6.07	0.76	5.32	3.1e-12	1.04e-10
chr20	61403613	61404113	*	7.05	7.91	4.6	3.32	3.19e-12	1.07e-10
chr17	28881874	28882374	*	5.07	6.05	0.01	6.04	3.21e-12	1.07e-10
chr19	15564597	15565097	*	5.28	6.26	-0.37	6.63	3.24e-12	1.08e-10
chr11	67158961	67159461	*	6.11	7	3.25	3.75	3.31e-12	1.1e-10
chr19	58175630	58176130	*	6.08	6.96	3.41	3.55	3.35e-12	1.12e-10
chr9	124535972	124536472	*	5.01	5.97	0.76	5.22	3.35e-12	1.12e-10
chr9	137234334	137234834	*	5.51	6.44	2.1	4.33	3.39e-12	1.13e-10
chr1	3199973	3200473	*	5.07	6.01	1.35	4.66	3.45e-12	1.14e-10
chr11	65585256	65585756	*	7.01	7.89	4.38	3.51	3.51e-12	1.16e-10
chr17	75062319	75062819	*	5.31	6.3	-0.37	6.66	3.54e-12	1.17e-10
chr1	17599365	17599865	*	5.21	6.19	0.13	6.06	3.58e-12	1.18e-10
chr20	35019089	35019589	*	6.48	7.35	3.94	3.41	3.59e-12	1.19e-10
chr1	12237125	12237625	*	5.46	6.41	1.71	4.7	3.63e-12	1.2e-10
chr7	359245	359745	*	5.28	6.22	1.7	4.52	3.64e-12	1.2e-10
chr1	16064070	16064570	*	5.25	6.23	-0.37	6.6	3.67e-12	1.21e-10
chr17	77258915	77259415	*	7.2	8.03	5	3.03	3.68e-12	1.21e-10
chr16	89939214	89939714	*	4.98	5.95	0.55	5.4	3.68e-12	1.21e-10
chr8	11448758	11449258	*	5.28	6.27	-0.37	6.63	3.75e-12	1.23e-10
chr20	42202592	42203092	*	5.46	6.37	2.4	3.96	3.76e-12	1.23e-10
chr7	44301796	44302296	*	5.9	6.77	3.4	3.37	3.78e-12	1.24e-10
chr1	180136630	180137130	*	6.56	7.43	4.04	3.39	3.83e-12	1.25e-10
chr3	52033012	52033512	*	5.29	6.24	1.42	4.82	3.83e-12	1.25e-10
chr16	58003544	58004044	*	4.95	5.92	0.55	5.37	3.87e-12	1.26e-10
chr10	1251603	1252103	*	5.4	6.32	2.16	4.16	3.9e-12	1.27e-10
chr3	13192824	13193324	*	5.66	6.59	2.41	4.18	3.9e-12	1.27e-10
chr14	105846513	105847013	*	8.22	9.07	5.93	3.14	3.96e-12	1.29e-10
chr6	169632682	169633182	*	6.65	7.5	4.35	3.15	3.99e-12	1.3e-10
chr11	64631562	64632062	*	5.82	6.73	2.71	4.02	4e-12	1.3e-10
chr7	5620262	5620762	*	5.28	6.26	0.13	6.13	4e-12	1.3e-10
chr5	7464355	7464855	*	6.05	6.92	3.57	3.34	4.05e-12	1.31e-10
chr1	45789315	45789815	*	5.65	6.54	2.89	3.65	4.18e-12	1.35e-10
chr20	61941626	61942126	*	6.39	7.25	3.96	3.29	4.22e-12	1.36e-10
chr10	135015256	135015756	*	5.3	6.24	1.65	4.59	4.22e-12	1.36e-10
chr11	67207217	67207717	*	5.67	6.56	2.95	3.61	4.23e-12	1.36e-10
chr17	42843841	42844341	*	5.29	6.25	1.24	5.01	4.24e-12	1.37e-10
chr11	133894949	133895449	*	6.63	7.47	4.39	3.08	4.25e-12	1.37e-10
chr1	883789	884289	*	6.06	6.94	3.39	3.55	4.32e-12	1.39e-10
chr19	10083619	10084119	*	6.77	7.62	4.37	3.26	4.33e-12	1.39e-10
chr16	1728186	1728686	*	5.04	5.99	1.13	4.86	4.35e-12	1.4e-10
chr13	99738756	99739256	*	5.15	6.12	0.01	6.11	4.36e-12	1.4e-10
chr11	67209908	67210408	*	5.73	6.6	3.25	3.34	4.38e-12	1.4e-10
chr12	3409833	3410333	*	6.18	7.03	3.81	3.22	4.38e-12	1.4e-10
chr2	239200205	239200705	*	4.98	5.95	0.3	5.65	4.4e-12	1.41e-10
chr14	105182333	105182833	*	5.23	6.22	-0.37	6.58	4.41e-12	1.41e-10
chr3	38040049	38040549	*	5.93	6.84	2.92	3.92	4.42e-12	1.41e-10
chr1	2343217	2343717	*	7.01	7.86	4.68	3.18	4.45e-12	1.42e-10
chr19	19110284	19110784	*	7.97	8.78	5.94	2.84	4.47e-12	1.42e-10
chr20	43340284	43340784	*	5.49	6.44	1.72	4.72	4.49e-12	1.43e-10
chr14	103541157	103541657	*	5.67	6.56	2.9	3.66	4.49e-12	1.43e-10
chr3	47618044	47618544	*	5.08	6.03	1.1	4.93	4.5e-12	1.43e-10
chr10	81016272	81016772	*	5.29	6.21	2.07	4.15	4.61e-12	1.46e-10
chr1	113498257	113498757	*	5.45	6.39	1.99	4.39	4.64e-12	1.47e-10
chr19	49580593	49581093	*	5.5	6.43	2.2	4.22	4.7e-12	1.49e-10
chr16	1832188	1832688	*	5.5	6.49	-0.37	6.86	4.71e-12	1.49e-10
chr11	65183030	65183530	*	5.45	6.38	2.07	4.31	4.71e-12	1.49e-10
chr2	88515011	88515511	*	6.2	7.07	3.56	3.51	4.73e-12	1.49e-10
chr11	61244858	61245358	*	5.08	6.03	1.1	4.93	4.78e-12	1.51e-10
chr12	125478356	125478856	*	8.49	9.36	6.03	3.32	4.82e-12	1.52e-10
chr1	53494300	53494800	*	5.63	6.53	2.73	3.81	5.05e-12	1.59e-10
chr17	48559547	48560047	*	6.73	7.67	3.21	4.46	5.08e-12	1.59e-10
chr16	2050310	2050810	*	6.42	7.26	4.2	3.06	5.09e-12	1.6e-10
chr17	78399017	78399517	*	5.91	6.81	2.91	3.9	5.12e-12	1.61e-10
chr1	3556976	3557476	*	5.08	6.04	0.94	5.1	5.14e-12	1.61e-10
chr1	27030519	27031019	*	5.29	6.22	1.87	4.35	5.16e-12	1.61e-10
chr17	46958237	46958737	*	5.85	6.78	2.51	4.27	5.16e-12	1.61e-10
chr7	158209978	158210478	*	5.1	6.06	0.83	5.23	5.17e-12	1.61e-10
chr19	1907661	1908161	*	7.28	8.11	5.13	2.99	5.24e-12	1.63e-10
chr7	99705704	99706204	*	5.42	6.37	1.55	4.82	5.28e-12	1.65e-10
chr10	99392759	99393259	*	5.11	6.07	1.1	4.97	5.35e-12	1.67e-10
chr12	123636320	123636820	*	6.13	7.02	3.35	3.67	5.36e-12	1.67e-10
chr20	61950623	61951123	*	7.14	8.01	4.69	3.31	5.49e-12	1.7e-10
chr19	55811403	55811903	*	4.99	5.97	0.31	5.66	5.52e-12	1.71e-10
chr16	1464777	1465277	*	6.49	7.35	4.01	3.34	5.54e-12	1.72e-10
chr17	76968951	76969451	*	6.58	7.41	4.4	3.01	5.61e-12	1.73e-10
chr5	1998364	1998864	*	5.03	6	0.13	5.88	5.67e-12	1.75e-10
chr16	1790923	1791423	*	6.75	7.66	3.67	4	5.71e-12	1.76e-10
chr8	143667607	143668107	*	6.41	7.29	3.75	3.54	5.78e-12	1.78e-10
chr19	39906530	39907030	*	4.94	5.91	0.31	5.61	5.8e-12	1.79e-10
chr4	8590890	8591390	*	5.32	6.25	1.79	4.46	5.89e-12	1.81e-10
chr22	38302360	38302860	*	6.55	7.44	3.78	3.67	5.91e-12	1.82e-10
chr15	28263344	28263844	*	5.1	6.03	1.77	4.25	5.97e-12	1.84e-10
chr19	7795142	7795642	*	6.26	7.14	3.53	3.61	6e-12	1.84e-10
chr11	68139576	68140076	*	7.22	8.07	4.88	3.19	6.02e-12	1.85e-10
chr17	48752886	48753386	*	5.04	5.97	1.66	4.32	6.06e-12	1.86e-10
chr3	50685052	50685552	*	5.27	6.25	-0.37	6.62	6.07e-12	1.86e-10
chr10	71623133	71623633	*	5	5.97	0.01	5.97	6.08e-12	1.86e-10
chr1	2843261	2843761	*	5.45	6.35	2.6	3.75	6.1e-12	1.86e-10
chr2	131512490	131512990	*	5.1	6.06	0.79	5.28	6.13e-12	1.87e-10
chr14	105815259	105815759	*	7.3	8.15	4.97	3.19	6.2e-12	1.89e-10
chr19	48114038	48114538	*	6.2	7.11	3.2	3.91	6.23e-12	1.9e-10
chr22	30605293	30605793	*	5.66	6.58	2.54	4.03	6.28e-12	1.91e-10
chr14	104682277	104682777	*	5.04	6	0.94	5.06	6.31e-12	1.92e-10
chr19	36380332	36380832	*	5.97	6.83	3.52	3.32	6.34e-12	1.92e-10
chr11	65780104	65780604	*	5.21	6.19	-0.37	6.56	6.38e-12	1.93e-10
chr21	47208208	47208708	*	5.02	5.98	0.79	5.2	6.4e-12	1.94e-10
chr14	105950344	105950844	*	7	7.85	4.63	3.22	6.42e-12	1.94e-10
chr12	12014340	12014840	*	5.05	6.03	0.01	6.02	6.48e-12	1.96e-10
chr18	77825707	77826207	*	6.38	7.25	3.87	3.37	6.49e-12	1.96e-10
chr11	64878129	64878629	*	7.36	8.24	4.72	3.52	6.52e-12	1.97e-10
chr3	13069813	13070313	*	6.81	7.63	4.73	2.9	6.59e-12	1.99e-10
chr9	135973506	135974006	*	5.18	6.17	-0.37	6.53	6.6e-12	1.99e-10
chr19	15891216	15891716	*	5.39	6.3	2.41	3.89	6.63e-12	1.99e-10
chr19	2636200	2636700	*	4.93	5.91	0.31	5.6	6.66e-12	2e-10
chr16	50660575	50661075	*	6.31	7.17	3.91	3.26	6.67e-12	2e-10
chr19	46381220	46381720	*	5.43	6.38	1.61	4.76	6.79e-12	2.04e-10
chr9	130707866	130708366	*	6.07	6.92	3.75	3.16	6.94e-12	2.08e-10
chr11	67028575	67029075	*	6.51	7.39	3.93	3.46	6.96e-12	2.08e-10
chr7	1578428	1578928	*	8.38	9.24	5.96	3.28	7.03e-12	2.1e-10
chr2	10572464	10572964	*	6.86	7.72	4.32	3.4	7.12e-12	2.13e-10
chr7	2191218	2191718	*	5.74	6.65	2.58	4.07	7.13e-12	2.13e-10
chr9	138444346	138444846	*	5.55	6.44	2.72	3.72	7.14e-12	2.13e-10
chr17	28548206	28548706	*	7.77	8.62	5.39	3.23	7.16e-12	2.13e-10
chr10	103453815	103454315	*	5.2	6.1	2.26	3.84	7.4e-12	2.2e-10
chr1	27790398	27790898	*	5.05	6.02	0.5	5.52	7.41e-12	2.2e-10
chr11	75221075	75221575	*	5.55	6.47	2.4	4.07	7.47e-12	2.22e-10
chr8	143585219	143585719	*	5.69	6.6	2.49	4.12	7.48e-12	2.22e-10
chr11	71127517	71128017	*	6.06	6.94	3.4	3.54	7.5e-12	2.22e-10
chr13	114515510	114516010	*	5.56	6.45	2.75	3.71	7.72e-12	2.29e-10
chr15	75484523	75485023	*	4.94	5.89	0.76	5.14	7.79e-12	2.31e-10
chr2	241947636	241948136	*	6.87	7.73	4.44	3.3	7.8e-12	2.31e-10
chr16	1097643	1098143	*	5.07	6	1.48	4.52	7.82e-12	2.31e-10
chr8	8805868	8806368	*	6.38	7.23	4.08	3.15	7.84e-12	2.31e-10
chr7	5629815	5630315	*	5.08	6.02	1.47	4.55	7.95e-12	2.34e-10
chr18	12252968	12253468	*	5.13	6.11	0.01	6.11	8.01e-12	2.36e-10
chr8	67528313	67528813	*	5.17	6.12	1.07	5.06	8.02e-12	2.36e-10
chr19	51688662	51689162	*	6.07	6.98	2.98	4.01	8.23e-12	2.42e-10
chr22	25328947	25329447	*	4.9	5.87	0.3	5.57	8.28e-12	2.43e-10
chr10	88714481	88714981	*	6.73	7.6	4.14	3.46	8.33e-12	2.44e-10
chr19	1396256	1396756	*	5.2	6.18	-0.37	6.55	8.37e-12	2.45e-10
chr11	66116406	66116906	*	5.17	6.16	-0.37	6.52	8.43e-12	2.47e-10
chr2	45160541	45161041	*	6.75	7.59	4.46	3.13	8.52e-12	2.49e-10
chr7	101341921	101342421	*	7.66	8.5	5.41	3.09	8.74e-12	2.55e-10
chr20	31269663	31270163	*	6.76	7.67	3.71	3.96	8.75e-12	2.55e-10
chr17	79403568	79404068	*	6.22	7.07	3.94	3.13	9.04e-12	2.64e-10
chr22	17671042	17671542	*	5.76	6.64	3.1	3.54	9.13e-12	2.66e-10
chr1	2936128	2936628	*	5.33	6.25	2.07	4.18	9.24e-12	2.69e-10
chr2	95670004	95670504	*	6.75	7.58	4.55	3.03	9.45e-12	2.75e-10
chr18	14450160	14450660	*	5.24	6.17	1.92	4.25	9.47e-12	2.75e-10
chr18	77504040	77504540	*	5.31	6.24	1.93	4.31	9.53e-12	2.77e-10
chr20	33290756	33291256	*	6.22	7.07	3.86	3.21	9.71e-12	2.81e-10
chr17	73732615	73733115	*	7.08	7.94	4.55	3.39	9.77e-12	2.83e-10
chr12	123480897	123481397	*	7.08	7.92	4.84	3.09	9.78e-12	2.83e-10
chr6	3355580	3356080	*	5.41	6.32	2.41	3.91	9.78e-12	2.83e-10
chr22	44778630	44779130	*	7.46	8.3	5.22	3.08	9.9e-12	2.86e-10
chr19	7916759	7917259	*	4.86	5.83	0.55	5.28	9.91e-12	2.86e-10
chr1	20021349	20021849	*	6.56	7.39	4.35	3.04	9.95e-12	2.87e-10
chr22	46264946	46265446	*	5.03	5.97	1.4	4.57	1.03e-11	2.97e-10
chr1	226826834	226827334	*	5.02	5.97	1.18	4.79	1.03e-11	2.98e-10
chr16	88833942	88834442	*	6.31	7.2	3.44	3.76	1.05e-11	3e-10
chr22	20144007	20144507	*	5.32	6.23	2.24	3.99	1.05e-11	3e-10
chr2	129450399	129450899	*	5.85	6.72	3.32	3.4	1.06e-11	3.04e-10
chr16	69599971	69600934	*	5.56	6.48	2.43	4.05	1.06e-11	3.05e-10
chr14	101696716	101697216	*	5.29	6.22	1.93	4.29	1.07e-11	3.06e-10
chr14	104891532	104892032	*	6.35	7.2	4.02	3.18	1.08e-11	3.09e-10
chr14	103234476	103234976	*	5	5.98	0.13	5.85	1.08e-11	3.09e-10
chr14	101022591	101023091	*	5.15	6.14	-0.37	6.5	1.1e-11	3.13e-10
chr15	74242681	74243181	*	6.67	7.57	3.77	3.81	1.1e-11	3.13e-10
chr20	39591318	39591818	*	5.12	6.1	-0.37	6.47	1.11e-11	3.17e-10
chr17	77704680	77705180	*	6.36	7.24	3.71	3.52	1.13e-11	3.21e-10
chr7	100609478	100609978	*	5.28	6.27	-0.37	6.63	1.13e-11	3.22e-10
chr18	10565455	10565955	*	6.58	7.46	3.87	3.59	1.13e-11	3.22e-10
chr17	1227436	1227936	*	6.49	7.38	3.71	3.68	1.13e-11	3.22e-10
chr17	29876208	29876708	*	7.74	8.59	5.48	3.11	1.14e-11	3.22e-10
chr7	100100664	100101164	*	6.01	6.9	3.15	3.75	1.14e-11	3.23e-10
chr9	137629333	137629833	*	5.12	6.1	-0.37	6.47	1.14e-11	3.23e-10
chr20	62464417	62464917	*	5.12	6.06	1.61	4.45	1.16e-11	3.29e-10
chr1	2262695	2263195	*	6.39	7.24	3.99	3.25	1.18e-11	3.34e-10
chr11	65343440	65343940	*	5.19	6.18	-0.37	6.54	1.19e-11	3.37e-10
chr19	30555667	30556167	*	7.44	8.27	5.28	3	1.2e-11	3.39e-10
chr11	64027122	64027622	*	7.29	8.16	4.73	3.43	1.2e-11	3.39e-10
chr8	143569689	143570189	*	5.85	6.7	3.51	3.2	1.22e-11	3.44e-10
chr15	42151594	42152094	*	5.02	5.99	0.5	5.49	1.24e-11	3.48e-10
chr1	26873319	26873819	*	6.15	7.01	3.79	3.22	1.25e-11	3.5e-10
chr1	29630604	29631104	*	6.42	7.25	4.24	3.01	1.25e-11	3.51e-10
chr19	42853805	42854305	*	5	5.95	1.1	4.84	1.26e-11	3.53e-10
chr16	88575074	88575574	*	4.94	5.9	0.9	5	1.27e-11	3.55e-10
chr7	44274629	44275129	*	4.87	5.82	0.94	4.88	1.27e-11	3.57e-10
chr5	79703793	79704293	*	5.17	6.15	-0.37	6.52	1.29e-11	3.59e-10
chr5	156753521	156754021	*	5.35	6.27	2.08	4.19	1.29e-11	3.59e-10
chr16	11706162	11706662	*	4.99	5.94	1.03	4.91	1.29e-11	3.6e-10
chr9	136725592	136726092	*	5.42	6.33	2.5	3.83	1.3e-11	3.62e-10
chr2	23907548	23908048	*	5.12	6.03	2.02	4.01	1.31e-11	3.66e-10
chr17	80012383	80012883	*	5.33	6.26	2.08	4.18	1.32e-11	3.68e-10
chr1	180213842	180214342	*	6.46	7.3	4.19	3.11	1.32e-11	3.68e-10
chr22	20005079	20005579	*	5.28	6.23	1.5	4.73	1.33e-11	3.7e-10
chr11	134269436	134269936	*	5.72	6.61	2.9	3.71	1.33e-11	3.7e-10
chr16	84988995	84989495	*	6.73	7.59	4.31	3.28	1.34e-11	3.72e-10
chrX	20008483	20008983	*	6.11	7	3.36	3.64	1.35e-11	3.73e-10
chr7	101457344	101457844	*	6.1	6.97	3.54	3.43	1.36e-11	3.76e-10
chr19	39694649	39695149	*	5.03	6.01	0.01	6.01	1.39e-11	3.84e-10
chr14	105198744	105199244	*	4.95	5.91	0.77	5.14	1.4e-11	3.87e-10
chr2	241439844	241440344	*	5.29	6.19	2.37	3.82	1.4e-11	3.87e-10
chr9	139607346	139607846	*	4.96	5.92	0.71	5.21	1.41e-11	3.9e-10
chr20	62420649	62421149	*	5.21	6.16	1.38	4.78	1.42e-11	3.9e-10
chr21	32930253	32930753	*	6	6.86	3.55	3.31	1.42e-11	3.91e-10
chr22	45555703	45556203	*	5.68	6.57	2.93	3.63	1.45e-11	3.97e-10
chr14	30397127	30397627	*	5.88	6.8	2.67	4.13	1.45e-11	3.97e-10
chr19	47267586	47268086	*	5.02	5.96	1.47	4.49	1.47e-11	4.04e-10
chr14	104012211	104012711	*	5.14	6.07	1.75	4.32	1.5e-11	4.11e-10
chr19	1020466	1020966	*	5.14	6.12	-0.37	6.49	1.51e-11	4.15e-10
chr16	2258000	2258500	*	5.8	6.7	3.01	3.68	1.52e-11	4.17e-10
chr16	4523551	4524051	*	5.25	6.2	1.38	4.82	1.54e-11	4.23e-10
chr11	747397	747897	*	5.43	6.34	2.4	3.94	1.55e-11	4.23e-10
chr3	52527080	52527580	*	4.91	5.89	0.13	5.76	1.55e-11	4.23e-10
chr22	39153893	39154393	*	6.93	7.75	4.85	2.9	1.55e-11	4.24e-10
chr16	890060	890560	*	6.14	6.98	3.89	3.09	1.56e-11	4.26e-10
chr6	158480628	158481128	*	5.16	6.11	1.18	4.93	1.57e-11	4.28e-10
chr20	39597517	39598017	*	4.87	5.83	0.55	5.28	1.57e-11	4.28e-10
chr11	76371956	76372456	*	7.39	8.24	5.03	3.2	1.59e-11	4.33e-10
chr20	49206956	49207456	*	4.96	5.91	1.11	4.8	1.61e-11	4.38e-10
chr17	18010217	18010717	*	5.84	6.75	2.83	3.93	1.62e-11	4.39e-10
chr11	60859509	60860009	*	5.87	6.76	3.17	3.59	1.62e-11	4.39e-10
chr17	72913595	72914095	*	6.84	7.69	4.47	3.23	1.63e-11	4.41e-10
chr20	61432978	61433478	*	5.31	6.24	1.98	4.26	1.63e-11	4.42e-10
chr9	140388805	140389305	*	5.57	6.46	2.83	3.63	1.66e-11	4.48e-10
chr19	2438370	2438870	*	5.84	6.77	2.54	4.23	1.66e-11	4.48e-10
chr12	133218654	133219154	*	5.75	6.67	2.53	4.13	1.67e-11	4.51e-10
chr22	24125728	24126228	*	6.79	7.65	4.37	3.29	1.68e-11	4.52e-10
chr3	38073850	38074350	*	5.79	6.65	3.35	3.3	1.7e-11	4.57e-10
chr20	2674064	2674564	*	5.72	6.6	3.06	3.54	1.73e-11	4.67e-10
chr19	29218154	29218654	*	6.07	6.99	2.85	4.14	1.76e-11	4.73e-10
chr2	88359675	88360175	*	5.82	6.72	2.95	3.76	1.77e-11	4.76e-10
chr11	113888468	113888968	*	4.94	5.9	0.94	4.96	1.79e-11	4.82e-10
chr7	2416400	2416900	*	7.97	8.83	5.6	3.23	1.8e-11	4.82e-10
chr21	47240033	47240533	*	5.17	6.1	1.75	4.35	1.82e-11	4.89e-10
chr6	33247850	33248350	*	6.59	7.44	4.23	3.21	1.83e-11	4.89e-10
chr11	1856959	1857459	*	5.05	5.99	1.35	4.64	1.84e-11	4.93e-10
chr6	169242886	169243386	*	6.45	7.36	3.34	4.02	1.85e-11	4.93e-10
chr11	1115579	1116079	*	5.54	6.42	2.96	3.46	1.87e-11	4.98e-10
chr20	57875627	57876127	*	6.74	7.58	4.52	3.06	1.87e-11	4.98e-10
chr17	62017500	62018000	*	5.09	6.06	0.76	5.3	1.89e-11	5.04e-10
chr19	47620707	47621207	*	5.4	6.3	2.51	3.79	1.9e-11	5.06e-10
chr15	90754365	90754865	*	6.9	7.75	4.62	3.13	1.91e-11	5.07e-10
chr17	25684195	25684695	*	6.02	6.86	3.77	3.08	1.93e-11	5.13e-10
chr1	201475901	201476401	*	6.35	7.27	3.18	4.08	1.97e-11	5.23e-10
chr4	2074050	2074550	*	5.75	6.69	2.07	4.62	2e-11	5.31e-10
chr15	76010425	76010925	*	5.08	6.06	-0.37	6.42	2.01e-11	5.34e-10
chr2	241107334	241107834	*	7.8	8.64	5.58	3.06	2.02e-11	5.36e-10
chr3	125987562	125988062	*	5.46	6.39	2.05	4.34	2.07e-11	5.47e-10
chr8	143679248	143679748	*	7.07	7.94	4.6	3.34	2.07e-11	5.47e-10
chr22	41776928	41777428	*	8.01	8.86	5.72	3.14	2.09e-11	5.51e-10
chr1	17556046	17556546	*	4.86	5.81	1.11	4.7	2.09e-11	5.52e-10
chr19	46995151	46995651	*	7.2	8.03	5.01	3.01	2.1e-11	5.54e-10
chr1	202611022	202611522	*	4.88	5.86	0.01	5.85	2.11e-11	5.56e-10
chr2	95715388	95715888	*	4.97	5.92	1.11	4.8	2.12e-11	5.58e-10
chr1	201349358	201349858	*	5.55	6.45	2.72	3.73	2.12e-11	5.59e-10
chr9	137350879	137351379	*	7.14	7.95	5.1	2.85	2.13e-11	5.6e-10
chr17	78805311	78805811	*	6.7	7.59	3.85	3.75	2.16e-11	5.66e-10
chr17	37772051	37772551	*	6.18	7.01	3.95	3.06	2.16e-11	5.68e-10
chr15	74896573	74897073	*	4.97	5.92	1.27	4.65	2.17e-11	5.69e-10
chr12	54595344	54595844	*	5.09	6.08	-0.37	6.44	2.18e-11	5.71e-10
chr17	77786717	77787217	*	7.01	7.89	4.37	3.52	2.19e-11	5.74e-10
chr7	56032372	56032872	*	8.48	9.32	6.21	3.11	2.19e-11	5.74e-10
chr22	50017775	50018275	*	6.45	7.31	4.02	3.3	2.21e-11	5.77e-10
chr17	73842023	73842523	*	4.92	5.88	0.77	5.12	2.22e-11	5.79e-10
chr17	73554422	73554922	*	5.27	6.22	1.45	4.77	2.22e-11	5.79e-10
chr2	85829638	85830138	*	5.27	6.26	-0.37	6.62	2.22e-11	5.79e-10
chr2	10209975	10210475	*	5	5.95	1.25	4.7	2.23e-11	5.79e-10
chr3	49208612	49209112	*	6.02	6.86	3.73	3.13	2.23e-11	5.79e-10
chr16	1053630	1054130	*	5.05	6.04	-0.37	6.4	2.24e-11	5.83e-10
chr1	6319507	6320007	*	5.4	6.32	2.11	4.21	2.26e-11	5.86e-10
chr10	80864873	80865373	*	5.9	6.74	3.68	3.06	2.26e-11	5.87e-10
chr10	73821708	73822208	*	5.09	6.08	-0.37	6.44	2.27e-11	5.89e-10
chr17	76171190	76171690	*	5.46	6.37	2.3	4.07	2.31e-11	5.97e-10
chr20	60723254	60723754	*	5.1	6.03	1.64	4.39	2.34e-11	6.05e-10
chr20	32289599	32290099	*	5.62	6.49	3.02	3.47	2.38e-11	6.14e-10
chr2	103235669	103236169	*	7.21	8.03	5.07	2.96	2.39e-11	6.17e-10
chr15	42168941	42169441	*	5.68	6.6	2.46	4.14	2.41e-11	6.21e-10
chr16	892525	893025	*	7.04	7.93	4.28	3.65	2.43e-11	6.27e-10
chr11	64305983	64306483	*	5.17	6.12	1.42	4.7	2.44e-11	6.29e-10
chr17	42987667	42988167	*	7.15	8.01	4.76	3.25	2.45e-11	6.31e-10
chr17	54671549	54672049	*	7.49	8.29	5.55	2.74	2.5e-11	6.42e-10
chr7	1521150	1521650	*	5.68	6.62	2.18	4.44	2.51e-11	6.45e-10
chr4	139936986	139937486	*	5.32	6.24	2.1	4.13	2.53e-11	6.49e-10
chr17	75299173	75299673	*	5.11	6.04	1.77	4.27	2.54e-11	6.51e-10
chr15	42264078	42264578	*	5.68	6.61	2.32	4.29	2.54e-11	6.51e-10
chr1	228547881	228548381	*	5.1	6.03	1.83	4.19	2.57e-11	6.57e-10
chr19	55697700	55698200	*	5.06	5.99	1.61	4.38	2.57e-11	6.58e-10
chr16	15081951	15082451	*	5.3	6.2	2.34	3.86	2.57e-11	6.58e-10
chr1	3206204	3206704	*	4.86	5.83	0.3	5.53	2.57e-11	6.58e-10
chr5	1109426	1109926	*	5.05	6.03	-0.37	6.4	2.6e-11	6.63e-10
chr19	48806768	48807268	*	5.04	6.03	-0.37	6.39	2.6e-11	6.63e-10
chr6	166239597	166240097	*	5.79	6.68	3.03	3.65	2.61e-11	6.65e-10
chr8	143761331	143761831	*	5.68	6.59	2.62	3.97	2.64e-11	6.72e-10
chr19	51512364	51512864	*	6.39	7.28	3.71	3.56	2.66e-11	6.78e-10
chr20	61946586	61947086	*	6.47	7.34	3.91	3.44	2.67e-11	6.78e-10
chr14	69290727	69291227	*	5.08	6.07	-0.37	6.43	2.67e-11	6.78e-10
chr22	36832402	36832902	*	7.39	8.26	4.85	3.42	2.67e-11	6.78e-10
chr16	71446026	71446526	*	5.24	6.16	2.13	4.03	2.68e-11	6.79e-10
chr19	42818409	42818909	*	7.46	8.31	5.09	3.22	2.69e-11	6.81e-10
chr1	1469654	1470154	*	5.18	6.12	1.69	4.43	2.69e-11	6.81e-10
chr1	2244001	2244501	*	6.78	7.69	3.83	3.86	2.7e-11	6.82e-10
chr15	69586078	69586578	*	4.97	5.92	1.03	4.89	2.7e-11	6.82e-10
chr8	142361117	142361617	*	5.29	6.22	1.91	4.31	2.71e-11	6.84e-10
chr9	139392877	139393377	*	4.85	5.81	0.76	5.04	2.72e-11	6.86e-10
chr8	145107002	145107502	*	6.53	7.4	3.98	3.42	2.73e-11	6.89e-10
chr2	74751160	74751660	*	5.53	6.44	2.42	4.02	2.77e-11	6.96e-10
chr15	91432751	91433251	*	5.71	6.59	2.98	3.62	2.81e-11	7.06e-10
chr6	34090500	34091000	*	6.31	7.14	4.09	3.05	2.81e-11	7.08e-10
chr1	199934194	199934694	*	5.05	6.03	-0.37	6.4	2.83e-11	7.1e-10
chr20	3650741	3651241	*	7.56	8.39	5.39	2.99	2.85e-11	7.15e-10
chr15	85874203	85874703	*	6.2	7.1	3.21	3.89	2.88e-11	7.23e-10
chr12	131873547	131874047	*	5.85	6.7	3.44	3.26	2.88e-11	7.23e-10
chr22	47019271	47019771	*	4.88	5.83	0.9	4.93	2.89e-11	7.25e-10
chr12	52284186	52284686	*	5.68	6.56	2.97	3.59	2.9e-11	7.26e-10
chr14	67919704	67920204	*	6.98	7.81	4.79	3.02	2.92e-11	7.29e-10
chr18	12272295	12272795	*	5.1	6.09	-0.37	6.45	2.92e-11	7.3e-10
chr11	120856490	120856990	*	6.63	7.51	4	3.51	2.93e-11	7.31e-10
chr7	1046394	1046894	*	5.92	6.77	3.66	3.1	2.93e-11	7.31e-10
chr11	74883141	74883641	*	5.1	6	2.12	3.88	2.93e-11	7.31e-10
chr22	50300676	50301176	*	5.99	6.91	2.87	4.03	2.96e-11	7.37e-10
chr1	26348510	26349010	*	4.89	5.86	0.01	5.85	3.01e-11	7.48e-10
chr9	138589075	138589575	*	5.14	6.13	-0.37	6.49	3.01e-11	7.48e-10
chr3	64587600	64588100	*	4.93	5.87	1.38	4.49	3.03e-11	7.52e-10
chr22	27018336	27018836	*	5.04	5.98	1.51	4.47	3.08e-11	7.64e-10
chr14	106380568	106381068	*	5.1	6.03	1.72	4.31	3.1e-11	7.68e-10
chr20	51768706	51769206	*	5.47	6.38	2.32	4.06	3.11e-11	7.72e-10
chr10	70782380	70782880	*	7.53	8.38	5.23	3.15	3.14e-11	7.77e-10
chr8	21980118	21980618	*	6.01	6.88	3.49	3.39	3.14e-11	7.78e-10
chr1	3191841	3192341	*	5.68	6.58	2.75	3.83	3.15e-11	7.79e-10
chr22	39239934	39240434	*	5.08	6.07	-0.37	6.43	3.16e-11	7.81e-10
chr11	66114252	66114752	*	5.21	6.15	1.51	4.64	3.17e-11	7.83e-10
chr5	179820831	179821331	*	6.14	7	3.72	3.28	3.21e-11	7.91e-10
chr2	233320191	233320691	*	4.99	5.93	1.49	4.43	3.23e-11	7.95e-10
chr1	16360658	16361158	*	5.36	6.25	2.7	3.55	3.25e-11	8.01e-10
chr22	39165166	39165666	*	7.62	8.46	5.36	3.1	3.26e-11	8.01e-10
chr20	897570	898070	*	4.99	5.93	1.5	4.43	3.26e-11	8.02e-10
chr1	31654344	31654844	*	5.3	6.26	1.26	5	3.27e-11	8.02e-10
chr1	910033	910533	*	6.87	7.73	4.41	3.32	3.28e-11	8.05e-10
chr1	155717862	155718362	*	4.89	5.86	0.01	5.85	3.29e-11	8.05e-10
chr22	50117890	50118390	*	6.86	7.75	4.07	3.69	3.33e-11	8.17e-10
chr5	179563278	179563778	*	4.93	5.89	0.79	5.1	3.36e-11	8.22e-10
chr7	157577732	157578232	*	4.79	5.76	0.56	5.2	3.37e-11	8.23e-10
chr1	151512980	151513480	*	5.52	6.43	2.37	4.06	3.38e-11	8.25e-10
chr1	226094043	226094543	*	5.41	6.31	2.4	3.91	3.4e-11	8.29e-10
chr21	47357473	47357973	*	4.81	5.76	0.9	4.87	3.4e-11	8.29e-10
chr8	143300683	143301183	*	5.28	6.18	2.39	3.78	3.46e-11	8.44e-10
chr5	132087668	132088168	*	5.24	6.18	1.54	4.64	3.47e-11	8.45e-10
chr17	18923107	18923607	*	7.35	8.22	4.8	3.42	3.5e-11	8.51e-10
chr19	13204127	13204627	*	6.07	6.92	3.72	3.2	3.58e-11	8.7e-10
chr19	45348774	45349274	*	5.13	6.11	-0.37	6.48	3.58e-11	8.71e-10
chr7	98580228	98580728	*	4.87	5.82	1.16	4.66	3.6e-11	8.73e-10
chr2	74588368	74588868	*	5.64	6.58	1.99	4.59	3.62e-11	8.77e-10
chr19	18894695	18895195	*	4.93	5.89	0.77	5.12	3.62e-11	8.78e-10
chr3	14175774	14176274	*	6	6.85	3.66	3.19	3.63e-11	8.79e-10
chr6	138482559	138483059	*	5.16	6.1	1.5	4.6	3.67e-11	8.88e-10
chr11	68540856	68541356	*	5.09	6	1.95	4.05	3.67e-11	8.88e-10
chr11	44949763	44950263	*	5.39	6.33	1.73	4.61	3.69e-11	8.92e-10
chr17	61590800	61591300	*	4.99	5.97	-0.37	6.34	3.69e-11	8.92e-10
chr16	70695914	70696414	*	5.93	6.82	3.06	3.77	3.7e-11	8.93e-10
chr9	132043788	132044288	*	5.41	6.3	2.68	3.62	3.73e-11	9e-10
chr7	100291052	100291552	*	5.07	6.05	-0.37	6.42	3.76e-11	9.04e-10
chr2	220093683	220094183	*	8.12	8.98	5.72	3.26	3.8e-11	9.14e-10
chr4	680400	680900	*	7.45	8.28	5.32	2.96	3.81e-11	9.14e-10
chr14	105799588	105800088	*	4.91	5.86	1.1	4.76	3.81e-11	9.14e-10
chr12	130965436	130965936	*	7.14	8.01	4.6	3.41	3.82e-11	9.18e-10
chr10	134273435	134273935	*	5.21	6.16	1.38	4.78	3.83e-11	9.19e-10
chr1	46697636	46698136	*	5.07	6.04	0.77	5.27	3.84e-11	9.2e-10
chr1	32139475	32139975	*	6.85	7.74	4.19	3.55	3.85e-11	9.22e-10
chr17	4693276	4693776	*	4.76	5.72	0.76	4.96	3.87e-11	9.26e-10
chr1	17594070	17594570	*	6.32	7.15	4.19	2.96	3.87e-11	9.26e-10
chr5	139155917	139156417	*	5.13	6.07	1.6	4.47	3.88e-11	9.26e-10
chr17	27044174	27044674	*	8.48	9.3	6.36	2.94	3.9e-11	9.32e-10
chr16	85495567	85496067	*	5.86	6.74	3.3	3.44	3.92e-11	9.36e-10
chr17	1365399	1365899	*	4.93	5.85	1.67	4.18	3.95e-11	9.41e-10
chr2	239049835	239050335	*	5.91	6.77	3.46	3.31	3.97e-11	9.45e-10
chr16	3713900	3714400	*	5.2	6.11	2.19	3.92	4.01e-11	9.54e-10
chr1	228396914	228397414	*	4.85	5.82	0.01	5.81	4.03e-11	9.58e-10
chr1	155276090	155276590	*	5.37	6.29	2.19	4.1	4.04e-11	9.58e-10
chr11	68843708	68844208	*	5.06	5.99	1.66	4.34	4.04e-11	9.58e-10
chr19	2376462	2376962	*	6.22	7.12	3.34	3.77	4.06e-11	9.63e-10
chr14	102556943	102557443	*	5.11	6.02	1.99	4.03	4.07e-11	9.64e-10
chr12	53498970	53499470	*	5.05	5.99	1.42	4.57	4.08e-11	9.65e-10
chr7	75915850	75916350	*	6.51	7.32	4.49	2.83	4.11e-11	9.74e-10
chr9	140006206	140006706	*	6.52	7.39	3.98	3.41	4.13e-11	9.76e-10
chr14	105045381	105045881	*	7.27	8.12	4.92	3.21	4.13e-11	9.77e-10
chr11	118476262	118476762	*	5.69	6.56	3.22	3.33	4.23e-11	9.98e-10
chr17	4502596	4503096	*	6.9	7.71	4.91	2.8	4.27e-11	1.01e-09
chr4	6330130	6330630	*	4.86	5.83	0.01	5.82	4.27e-11	1.01e-09
chr7	76000192	76000692	*	5.23	6.13	2.4	3.72	4.28e-11	1.01e-09
chr22	46818773	46819273	*	6.18	7.01	4.05	2.95	4.3e-11	1.01e-09
chr11	119724439	119724939	*	5.1	6.03	1.75	4.28	4.32e-11	1.01e-09
chr8	1792321	1792821	*	4.94	5.87	1.45	4.42	4.36e-11	1.02e-09
chr2	241733238	241733738	*	5.27	6.17	2.34	3.83	4.37e-11	1.03e-09
chr2	239331911	239332411	*	4.95	5.9	1.11	4.79	4.39e-11	1.03e-09
chr5	149592805	149593305	*	5.33	6.27	1.72	4.55	4.4e-11	1.03e-09
chr7	151091195	151091695	*	4.81	5.78	0.4	5.38	4.43e-11	1.04e-09
chr12	110518118	110518618	*	4.84	5.8	0.76	5.04	4.45e-11	1.04e-09
chr7	73007390	73007890	*	5.78	6.69	2.8	3.89	4.46e-11	1.04e-09
chr3	47466888	47467388	*	5	5.98	-0.37	6.35	4.46e-11	1.04e-09
chr19	2454302	2454802	*	5.86	6.73	3.35	3.38	4.47e-11	1.04e-09
chr12	131761251	131761751	*	6.28	7.15	3.73	3.42	4.48e-11	1.05e-09
chr11	66016397	66016897	*	5.37	6.27	2.45	3.82	4.51e-11	1.05e-09
chr11	128750800	128751300	*	5.1	6.09	-0.37	6.45	4.53e-11	1.05e-09
chr18	77145732	77146232	*	4.94	5.87	1.7	4.17	4.58e-11	1.07e-09
chr22	19714684	19715184	*	5.27	6.16	2.51	3.64	4.61e-11	1.07e-09
chr10	120610699	120611199	*	6.35	7.16	4.35	2.81	4.62e-11	1.07e-09
chr1	111153089	111153589	*	5.27	6.19	2.11	4.08	4.67e-11	1.08e-09
chr1	111682723	111683223	*	5.08	6	1.75	4.26	4.71e-11	1.09e-09
chr3	50255014	50255514	*	4.86	5.83	0.55	5.28	4.81e-11	1.12e-09
chr5	175961248	175961748	*	4.89	5.86	0.56	5.3	4.82e-11	1.12e-09
chr1	155149608	155150108	*	4.84	5.81	0.01	5.8	4.84e-11	1.12e-09
chr22	51116471	51116971	*	5.05	5.98	1.61	4.37	4.86e-11	1.12e-09
chr8	144066913	144067413	*	6.26	7.1	3.97	3.13	4.86e-11	1.12e-09
chr17	25966008	25966508	*	5.66	6.54	2.99	3.55	4.88e-11	1.13e-09
chr22	49086414	49086914	*	4.75	5.7	0.76	4.94	4.91e-11	1.13e-09
chr14	93572348	93572848	*	6.1	7.03	2.86	4.16	4.95e-11	1.14e-09
chr11	64612245	64612745	*	6.08	6.99	2.96	4.03	4.99e-11	1.15e-09
chr2	97198108	97198608	*	5.24	6.19	1.52	4.67	5e-11	1.15e-09
chr4	3294397	3294897	*	5.86	6.75	3.17	3.58	5.02e-11	1.15e-09
chr22	46466820	46467320	*	6.05	6.98	2.75	4.23	5.02e-11	1.15e-09
chr20	58141614	58142114	*	4.85	5.79	1.1	4.69	5.08e-11	1.17e-09
chr18	33160984	33161484	*	7.31	8.16	4.97	3.19	5.13e-11	1.18e-09
chr7	100928520	100929020	*	5.37	6.27	2.51	3.77	5.14e-11	1.18e-09
chr22	41970562	41971062	*	5.35	6.22	2.79	3.44	5.16e-11	1.18e-09
chr1	160231658	160232158	*	5.44	6.33	2.64	3.69	5.17e-11	1.19e-09
chr5	176070538	176071038	*	7.02	7.88	4.55	3.33	5.19e-11	1.19e-09
chr1	17882032	17882532	*	5.04	5.99	1.36	4.63	5.22e-11	1.19e-09
chr11	117699610	117700110	*	6.31	7.22	3.33	3.89	5.25e-11	1.2e-09
chr19	2645332	2645832	*	5.16	6.07	2.13	3.94	5.28e-11	1.21e-09
chr16	3116788	3117288	*	5.51	6.43	2.34	4.09	5.35e-11	1.22e-09
chr22	43029269	43029769	*	5.72	6.63	2.63	4	5.36e-11	1.22e-09
chr16	11878647	11879147	*	4.96	5.89	1.49	4.4	5.36e-11	1.22e-09
chr14	74195177	74195677	*	6.01	6.87	3.6	3.27	5.38e-11	1.22e-09
chr11	68557751	68558251	*	5.51	6.42	2.32	4.1	5.41e-11	1.23e-09
chr1	228582685	228583185	*	4.97	5.95	-0.37	6.31	5.43e-11	1.24e-09
chr21	46184586	46185086	*	5.35	6.27	2.11	4.16	5.49e-11	1.25e-09
chr8	142113396	142113896	*	4.84	5.79	0.94	4.86	5.53e-11	1.26e-09
chr1	227978899	227979399	*	8.84	9.68	6.51	3.17	5.57e-11	1.26e-09
chr7	44264557	44265057	*	6.16	7	3.89	3.1	5.58e-11	1.26e-09
chr1	19395046	19395546	*	5.15	6.09	1.62	4.47	5.58e-11	1.26e-09
chr2	129969164	129969664	*	4.99	5.98	-0.37	6.34	5.58e-11	1.26e-09
chr11	782118	782618	*	4.87	5.81	1.16	4.65	5.66e-11	1.28e-09
chr22	43147782	43148282	*	6.7	7.62	3.56	4.06	5.7e-11	1.29e-09
chr20	61698235	61698735	*	5.21	6.15	1.58	4.57	5.75e-11	1.3e-09
chr1	38416052	38416552	*	5.38	6.29	2.38	3.91	5.76e-11	1.3e-09
chr2	241735288	241735788	*	5.48	6.42	1.9	4.51	5.78e-11	1.3e-09
chr19	5799805	5800305	*	4.82	5.78	0.5	5.28	5.78e-11	1.3e-09
chr4	1563187	1563687	*	5.26	6.19	1.82	4.37	5.79e-11	1.3e-09
chr2	23815007	23815507	*	6.57	7.41	4.39	3.02	5.83e-11	1.31e-09
chr11	68391109	68391609	*	6.76	7.63	4.2	3.43	5.83e-11	1.31e-09
chr8	142662938	142663438	*	7.67	8.49	5.53	2.96	5.85e-11	1.31e-09
chr3	69788713	69789213	*	7.5	8.32	5.4	2.92	5.85e-11	1.31e-09
chr16	85511319	85511819	*	4.87	5.82	0.97	4.86	5.86e-11	1.31e-09
chr3	52825674	52826174	*	4.91	5.88	0.13	5.75	5.88e-11	1.32e-09
chr7	2209028	2209528	*	6.52	7.34	4.41	2.93	5.92e-11	1.33e-09
chr18	11983619	11984119	*	5.86	6.73	3.23	3.51	5.95e-11	1.33e-09
chr12	51441564	51442064	*	5.74	6.67	2.42	4.25	5.99e-11	1.34e-09
chr10	43428345	43428845	*	5.19	6.17	0.01	6.16	6.05e-11	1.35e-09
chr10	48335265	48335765	*	5.51	6.41	2.58	3.83	6.12e-11	1.37e-09
chr2	241708543	241709043	*	5.02	6	-0.37	6.37	6.16e-11	1.37e-09
chr17	72900931	72901431	*	6	6.86	3.61	3.25	6.26e-11	1.4e-09
chr19	36044002	36044502	*	7	7.87	4.49	3.38	6.27e-11	1.4e-09
chr17	79480354	79480854	*	6.49	7.34	4.08	3.26	6.28e-11	1.4e-09
chr12	12260607	12261107	*	5.83	6.73	2.94	3.79	6.35e-11	1.41e-09
chr1	9048888	9049388	*	4.81	5.74	1.4	4.34	6.36e-11	1.41e-09
chr5	652200	652700	*	5.55	6.42	3	3.42	6.36e-11	1.41e-09
chr9	136753856	136754356	*	4.84	5.77	1.27	4.5	6.43e-11	1.43e-09
chrX	68294567	68295067	*	5.82	6.68	3.43	3.24	6.5e-11	1.44e-09
chr17	73498392	73498892	*	5	5.95	1.26	4.69	6.7e-11	1.49e-09
chr3	58476784	58477284	*	5.48	6.37	2.72	3.65	6.75e-11	1.49e-09
chr15	22892167	22892667	*	5.07	6.01	1.38	4.63	6.78e-11	1.5e-09
chr17	73342704	73343204	*	5.32	6.25	2	4.24	6.79e-11	1.5e-09
chr10	48371105	48371605	*	4.95	5.9	1.24	4.66	6.82e-11	1.51e-09
chr19	39888032	39888532	*	4.71	5.67	0.4	5.27	6.85e-11	1.51e-09
chr12	131479254	131479754	*	4.99	5.97	-0.37	6.34	6.92e-11	1.53e-09
chr1	45156432	45156932	*	5.14	6.13	-0.37	6.49	6.92e-11	1.53e-09
chr1	46880014	46880514	*	6.23	7.06	4.06	3	6.93e-11	1.53e-09
chr19	45311086	45311586	*	6.12	6.97	3.7	3.27	6.96e-11	1.53e-09
chr3	52387320	52387820	*	5.73	6.61	3.1	3.51	6.96e-11	1.53e-09
chr6	36806774	36807274	*	6.67	7.5	4.48	3.03	6.99e-11	1.54e-09
chr17	37852918	37853418	*	4.97	5.9	1.5	4.4	7.14e-11	1.57e-09
chr1	9673156	9673656	*	6.87	7.74	4.32	3.43	7.17e-11	1.57e-09
chr2	106139138	106139638	*	6.71	7.53	4.61	2.92	7.22e-11	1.58e-09
chr14	91884401	91884901	*	4.83	5.79	0.3	5.49	7.23e-11	1.58e-09
chr14	75408082	75408582	*	5.36	6.26	2.51	3.75	7.23e-11	1.58e-09
chrX	152750376	152750876	*	5.05	5.99	1.38	4.61	7.25e-11	1.59e-09
chr19	19650565	19651065	*	5.1	6.03	1.69	4.34	7.26e-11	1.59e-09
chr17	79622301	79622801	*	5.41	6.28	2.91	3.37	7.32e-11	1.6e-09
chr12	129056539	129057039	*	4.98	5.93	1.25	4.68	7.39e-11	1.61e-09
chr22	35696230	35696730	*	6.04	6.95	3.02	3.92	7.43e-11	1.62e-09
chr20	61866629	61867129	*	7.02	7.84	4.92	2.92	7.47e-11	1.63e-09
chr11	67074828	67075328	*	6.34	7.2	3.91	3.29	7.49e-11	1.63e-09
chr20	62610214	62610714	*	7.03	7.88	4.63	3.25	7.49e-11	1.63e-09
chr20	30469715	30470215	*	5.19	6.18	-0.37	6.54	7.5e-11	1.63e-09
chr10	134903989	134904489	*	7.34	8.22	4.62	3.6	7.6e-11	1.65e-09
chr1	169454695	169455195	*	5.02	5.93	2.04	3.89	7.62e-11	1.66e-09
chr2	241386896	241387396	*	6.88	7.7	4.78	2.92	7.65e-11	1.66e-09
chr19	3725214	3725714	*	5.13	6.07	1.42	4.65	7.66e-11	1.66e-09
chr17	56598338	56598838	*	6.78	7.61	4.65	2.96	7.7e-11	1.67e-09
chr21	45234262	45234762	*	5.34	6.27	2.05	4.21	7.71e-11	1.67e-09
chr17	47578976	47579476	*	4.91	5.83	1.64	4.19	7.79e-11	1.69e-09
chr4	6260672	6261172	*	5.08	5.99	1.94	4.06	7.87e-11	1.7e-09
chr4	700800	701300	*	5.02	5.93	1.95	3.97	7.93e-11	1.71e-09
chr1	109817120	109817620	*	6.39	7.22	4.25	2.97	7.96e-11	1.72e-09
chr20	36764172	36764672	*	5.39	6.32	1.97	4.35	8e-11	1.73e-09
chr6	3799345	3799845	*	5.84	6.7	3.44	3.26	8e-11	1.73e-09
chr1	19970224	19970724	*	4.83	5.79	0.9	4.89	8.05e-11	1.74e-09
chr22	50686569	50687069	*	5.15	6.07	1.91	4.16	8.24e-11	1.78e-09
chr4	177241210	177241710	*	4.79	5.75	0.76	4.99	8.3e-11	1.79e-09
chr17	40902581	40903081	*	5.38	6.29	2.34	3.95	8.3e-11	1.79e-09
chr1	19060657	19061157	*	5.73	6.65	2.45	4.2	8.37e-11	1.8e-09
chr7	826211	826711	*	4.89	5.87	-0.37	6.24	8.47e-11	1.82e-09
chr1	109812271	109812771	*	5.59	6.52	2.24	4.28	8.53e-11	1.83e-09
chr19	45769627	45770127	*	4.75	5.7	0.76	4.95	8.56e-11	1.84e-09
chr5	302552	303052	*	7.08	7.91	4.93	2.98	8.59e-11	1.84e-09
chr9	130493035	130493535	*	7.65	8.5	5.26	3.24	8.65e-11	1.85e-09
chr10	72283618	72284118	*	7.67	8.5	5.43	3.08	8.77e-11	1.88e-09
chr7	37960324	37960824	*	6.73	7.59	4.29	3.31	8.78e-11	1.88e-09
chr3	101397046	101397546	*	5.3	6.24	1.61	4.63	8.79e-11	1.88e-09
chr9	129461360	129461860	*	5.04	5.97	1.49	4.48	8.84e-11	1.89e-09
chr19	15442694	15443194	*	6.25	7.18	2.83	4.35	8.87e-11	1.89e-09
chr20	25604187	25604687	*	4.81	5.78	0.01	5.78	8.88e-11	1.9e-09
chr3	50164596	50165096	*	5.58	6.5	2.46	4.04	8.9e-11	1.9e-09
chr8	143867039	143867539	*	5.42	6.34	2.09	4.25	8.93e-11	1.9e-09
chr10	102835747	102836247	*	5.67	6.53	3.19	3.34	8.96e-11	1.91e-09
chr19	35344090	35344590	*	4.94	5.92	-0.37	6.29	8.99e-11	1.91e-09
chr19	14098426	14098926	*	4.88	5.86	-0.37	6.23	9.02e-11	1.92e-09
chr22	29722723	29723223	*	4.78	5.73	0.83	4.9	9.07e-11	1.93e-09
chr2	220411789	220412289	*	5.36	6.25	2.67	3.58	9.17e-11	1.95e-09
chr17	1540070	1540570	*	4.9	5.88	-0.37	6.25	9.22e-11	1.96e-09
chr9	139151656	139152156	*	5.48	6.36	2.83	3.53	9.23e-11	1.96e-09
chr19	10117647	10118147	*	4.93	5.89	0.95	4.94	9.24e-11	1.96e-09
chr10	13341399	13341899	*	5.59	6.48	2.82	3.66	9.29e-11	1.97e-09
chr3	46746279	46746779	*	7.98	8.84	5.48	3.36	9.32e-11	1.97e-09
chr8	145595574	145596074	*	4.74	5.69	0.77	4.93	9.4e-11	1.99e-09
chr22	25798588	25799088	*	5.71	6.59	3.12	3.46	9.5e-11	2.01e-09
chr22	38808463	38808963	*	5.47	6.33	2.99	3.34	9.51e-11	2.01e-09
chr5	178157006	178157506	*	5.04	6.02	-0.37	6.38	9.52e-11	2.01e-09
chr15	85491182	85491682	*	6.55	7.46	3.57	3.89	9.53e-11	2.01e-09
chr22	38130961	38131461	*	5.82	6.73	2.7	4.03	9.67e-11	2.04e-09
chr2	10378556	10379056	*	5.43	6.32	2.58	3.74	9.81e-11	2.07e-09
chr7	44299860	44300360	*	6.47	7.3	4.33	2.96	9.82e-11	2.07e-09
chr5	684946	685446	*	5.22	6.14	2	4.14	9.99e-11	2.1e-09
chr15	27786728	27787228	*	5.44	6.35	2.35	4	1e-10	2.11e-09
chr16	4742806	4743306	*	6.73	7.55	4.6	2.96	1.02e-10	2.14e-09
chr7	1789467	1789967	*	4.8	5.74	1.1	4.64	1.02e-10	2.15e-09
chr1	2340202	2340702	*	5.45	6.32	2.84	3.48	1.03e-10	2.15e-09
chr19	47479621	47480121	*	4.97	5.95	-0.37	6.31	1.03e-10	2.16e-09
chr17	78084946	78085446	*	5.24	6.16	2.07	4.09	1.04e-10	2.17e-09
chr6	15660709	15661209	*	5.36	6.22	2.88	3.34	1.04e-10	2.17e-09
chr22	23152612	23153112	*	4.87	5.85	-0.37	6.21	1.04e-10	2.17e-09
chr22	29450166	29450666	*	5.07	5.98	1.91	4.07	1.04e-10	2.18e-09
chr1	206680923	206681423	*	5.65	6.58	2.41	4.17	1.06e-10	2.21e-09
chr19	14071035	14071535	*	6.49	7.33	4.24	3.09	1.06e-10	2.21e-09
chr15	45321669	45322169	*	4.92	5.91	-0.37	6.27	1.06e-10	2.22e-09
chr9	138116197	138116697	*	4.68	5.64	0.63	5.01	1.07e-10	2.22e-09
chr17	1550717	1551217	*	4.88	5.83	0.9	4.93	1.07e-10	2.23e-09
chr1	110168718	110169218	*	5.53	6.46	2.02	4.44	1.07e-10	2.23e-09
chr17	78042264	78042764	*	5.89	6.73	3.64	3.09	1.07e-10	2.23e-09
chr1	1222828	1223328	*	5.63	6.55	2.33	4.22	1.08e-10	2.24e-09
chr11	118566891	118567391	*	5.43	6.32	2.61	3.71	1.08e-10	2.24e-09
chr1	234541259	234541759	*	4.71	5.67	0.76	4.91	1.08e-10	2.24e-09
chr22	23502726	23503226	*	6.39	7.28	3.63	3.65	1.08e-10	2.25e-09
chr10	74082896	74083396	*	5.83	6.7	3.31	3.39	1.08e-10	2.25e-09
chr17	7162656	7163156	*	5.1	6.01	2.06	3.95	1.09e-10	2.26e-09
chr16	585745	586245	*	5.49	6.36	3.02	3.34	1.12e-10	2.32e-09
chr2	233198529	233199029	*	5.27	6.21	1.72	4.49	1.12e-10	2.33e-09
chr7	63250281	63250781	*	4.99	5.92	1.43	4.49	1.13e-10	2.33e-09
chr9	116844276	116844776	*	4.75	5.71	0.56	5.15	1.13e-10	2.34e-09
chr14	69289362	69289862	*	5.96	6.85	3.19	3.67	1.13e-10	2.34e-09
chr19	56048203	56048703	*	7.45	8.32	5.01	3.31	1.13e-10	2.34e-09
chr1	26191690	26192190	*	5.25	6.17	2.14	4.03	1.13e-10	2.34e-09
chr2	128477202	128477702	*	4.94	5.88	1.1	4.78	1.14e-10	2.34e-09
chr1	19214948	19215448	*	6.08	6.91	3.85	3.07	1.14e-10	2.35e-09
chr1	40781991	40782491	*	5.5	6.41	2.55	3.85	1.15e-10	2.37e-09
chr3	48604388	48604888	*	5.73	6.63	2.81	3.82	1.16e-10	2.39e-09
chr22	30778897	30779397	*	8.32	9.15	6.13	3.01	1.16e-10	2.39e-09
chr22	45338283	45338783	*	5.79	6.69	2.86	3.83	1.16e-10	2.39e-09
chr1	16378748	16379248	*	5.75	6.66	2.83	3.82	1.18e-10	2.42e-09
chr1	26107501	26108001	*	6.37	7.22	4.03	3.19	1.18e-10	2.42e-09
chr11	70564287	70564787	*	5.08	5.98	2.29	3.69	1.19e-10	2.43e-09
chr10	102896931	102897431	*	5.63	6.48	3.26	3.22	1.19e-10	2.44e-09
chr20	61429236	61429736	*	5.67	6.54	3.16	3.38	1.2e-10	2.45e-09
chr11	68117074	68117574	*	7.05	7.82	5.23	2.59	1.21e-10	2.47e-09
chr8	143276657	143277157	*	8.49	9.31	6.4	2.91	1.21e-10	2.48e-09
chr22	50966661	50967161	*	6.09	6.99	3.09	3.91	1.22e-10	2.48e-09
chr1	19670368	19670868	*	5.56	6.45	2.9	3.55	1.24e-10	2.53e-09
chr1	228359090	228359590	*	6.88	7.79	3.7	4.09	1.25e-10	2.55e-09
chr19	39369891	39370391	*	5.47	6.37	2.5	3.87	1.26e-10	2.57e-09
chr11	46413502	46414002	*	4.89	5.82	1.45	4.37	1.26e-10	2.57e-09
chr17	61774147	61774647	*	5.32	6.2	2.71	3.48	1.27e-10	2.59e-09
chr20	62703582	62704082	*	4.88	5.86	-0.37	6.23	1.28e-10	2.61e-09
chr16	28619394	28619894	*	5.03	5.97	1.39	4.58	1.29e-10	2.61e-09
chr17	79791463	79791963	*	7.57	8.41	5.24	3.18	1.3e-10	2.65e-09
chr17	79098482	79098982	*	6.44	7.35	3.53	3.82	1.3e-10	2.65e-09
chr2	235596373	235596873	*	6.97	7.87	4.15	3.71	1.32e-10	2.68e-09
chr4	1988825	1989325	*	5.24	6.13	2.38	3.75	1.32e-10	2.68e-09
chr7	158237973	158238473	*	5.82	6.68	3.37	3.31	1.32e-10	2.68e-09
chr1	110051688	110052188	*	5.5	6.41	2.44	3.98	1.33e-10	2.69e-09
chr19	7998077	7998577	*	5.16	6.08	1.92	4.17	1.35e-10	2.72e-09
chr7	64347988	64348488	*	5.13	6.04	2.02	4.02	1.35e-10	2.72e-09
chr2	238772867	238773367	*	5.46	6.36	2.47	3.89	1.35e-10	2.72e-09
chr16	3541217	3541717	*	4.85	5.83	-0.37	6.2	1.36e-10	2.74e-09
chr22	45016661	45017161	*	5.25	6.14	2.54	3.6	1.37e-10	2.77e-09
chr18	13583707	13584207	*	7.27	8.08	5.23	2.86	1.38e-10	2.78e-09
chr22	24163256	24163756	*	7.28	8.13	4.93	3.19	1.39e-10	2.8e-09
chr10	71933652	71934152	*	6.05	6.9	3.72	3.18	1.39e-10	2.8e-09
chr14	77662527	77663027	*	6.49	7.32	4.37	2.94	1.41e-10	2.83e-09
chr10	104920405	104920905	*	5.42	6.3	2.86	3.44	1.42e-10	2.85e-09
chr1	95314338	95314838	*	5.12	6.02	2.17	3.85	1.42e-10	2.86e-09
chr1	156508529	156509029	*	6.57	7.46	3.83	3.63	1.43e-10	2.87e-09
chr20	62138786	62139286	*	7.8	8.67	5.16	3.51	1.43e-10	2.87e-09
chr1	22157726	22158226	*	4.85	5.83	-0.37	6.2	1.43e-10	2.87e-09
chr11	62313793	62314293	*	6.52	7.37	4.15	3.22	1.44e-10	2.88e-09
chr11	64453062	64453562	*	5.37	6.28	2.29	3.98	1.44e-10	2.89e-09
chr16	2054377	2054877	*	4.83	5.81	-0.37	6.17	1.45e-10	2.89e-09
chr5	177765328	177765828	*	4.95	5.93	-0.37	6.3	1.45e-10	2.89e-09
chr16	69966434	69966934	*	5.48	6.4	2.36	4.03	1.45e-10	2.9e-09
chr7	5632430	5632930	*	7.47	8.3	5.25	3.06	1.46e-10	2.91e-09
chr4	1562162	1562662	*	4.85	5.83	-0.37	6.2	1.46e-10	2.91e-09
chr14	104671563	104672063	*	5.89	6.82	2.5	4.32	1.46e-10	2.91e-09
chr6	42043024	42043524	*	6.27	7.11	3.98	3.13	1.46e-10	2.91e-09
chr20	43272834	43273334	*	6.77	7.62	4.51	3.11	1.48e-10	2.94e-09
chr9	139876480	139876980	*	4.84	5.82	-0.37	6.18	1.49e-10	2.96e-09
chr11	47414919	47415419	*	6.08	6.97	3.23	3.74	1.5e-10	2.98e-09
chr17	17415670	17416170	*	5.24	6.17	1.97	4.2	1.5e-10	2.99e-09
chr9	38545648	38546148	*	7.38	8.2	5.29	2.91	1.52e-10	3.02e-09
chr17	72459122	72459622	*	5.29	6.22	1.81	4.41	1.53e-10	3.04e-09
chr14	105909213	105909713	*	6.41	7.24	4.26	2.98	1.54e-10	3.05e-09
chr7	2515302	2515802	*	5.16	6.04	2.46	3.59	1.55e-10	3.06e-09
chr8	25315262	25315762	*	5.78	6.66	3.17	3.48	1.55e-10	3.06e-09
chr11	47381568	47382068	*	4.77	5.74	0.3	5.44	1.56e-10	3.08e-09
chr1	21034557	21035057	*	6.79	7.62	4.62	3	1.56e-10	3.09e-09
chr6	31434776	31435276	*	5.27	6.18	2.21	3.96	1.57e-10	3.1e-09
chr17	42608793	42609293	*	5.56	6.42	3.1	3.32	1.57e-10	3.11e-09
chr17	80008546	80009046	*	7.16	8	4.92	3.08	1.59e-10	3.13e-09
chr5	176760973	176761473	*	4.83	5.81	-0.37	6.17	1.59e-10	3.13e-09
chr2	219894849	219895349	*	5.2	6.12	1.97	4.14	1.59e-10	3.13e-09
chr19	17826086	17826586	*	6.06	6.89	3.94	2.95	1.6e-10	3.14e-09
chr11	63771780	63772280	*	4.86	5.84	-0.37	6.21	1.6e-10	3.15e-09
chr19	18559249	18559749	*	4.71	5.65	1.11	4.54	1.61e-10	3.16e-09
chr17	79702189	79702689	*	4.63	5.6	0.3	5.3	1.65e-10	3.24e-09
chr8	145643170	145643670	*	5.72	6.61	2.87	3.74	1.65e-10	3.24e-09
chr22	20307763	20308263	*	4.89	5.86	0.3	5.56	1.65e-10	3.24e-09
chr10	88295035	88295535	*	4.87	5.78	1.76	4.02	1.65e-10	3.24e-09
chr9	129389190	129389690	*	5.3	6.17	2.8	3.37	1.65e-10	3.25e-09
chr9	130697151	130697651	*	6.24	7.15	3.22	3.93	1.66e-10	3.25e-09
chrX	153563233	153563733	*	4.95	5.93	-0.37	6.3	1.66e-10	3.26e-09
chr5	1539519	1540019	*	6.76	7.6	4.49	3.11	1.66e-10	3.26e-09
chr20	57187317	57187817	*	6.7	7.53	4.48	3.05	1.67e-10	3.27e-09
chr7	98165121	98165621	*	5.13	6.02	2.35	3.67	1.68e-10	3.29e-09
chr22	22041042	22041542	*	4.84	5.82	-0.37	6.19	1.7e-10	3.33e-09
chr10	133794920	133795420	*	4.8	5.78	-0.37	6.15	1.71e-10	3.33e-09
chr16	66640782	66641282	*	6.31	7.15	3.99	3.16	1.74e-10	3.4e-09
chr8	144643713	144644213	*	4.94	5.92	-0.37	6.28	1.76e-10	3.44e-09
chr22	21349286	21349786	*	5.56	6.48	2.16	4.32	1.78e-10	3.47e-09
chr15	60854146	60854646	*	6.03	6.89	3.6	3.29	1.78e-10	3.47e-09
chr19	1224719	1225219	*	6.3	7.19	3.55	3.64	1.79e-10	3.48e-09
chr20	61999081	61999581	*	5.93	6.81	3.21	3.6	1.79e-10	3.48e-09
chr16	630539	631039	*	4.83	5.81	-0.37	6.18	1.81e-10	3.51e-09
chr19	4351343	4351843	*	4.96	5.94	-0.37	6.31	1.81e-10	3.52e-09
chr14	104159758	104160258	*	6.86	7.71	4.57	3.14	1.81e-10	3.52e-09
chr16	70739991	70740491	*	6.59	7.43	4.35	3.09	1.82e-10	3.53e-09
chr9	136027375	136027875	*	4.72	5.69	0.13	5.57	1.82e-10	3.53e-09
chr13	19755559	19756059	*	4.68	5.65	0.13	5.52	1.82e-10	3.53e-09
chr20	55733491	55733991	*	7.26	8.07	5.24	2.83	1.84e-10	3.57e-09
chr10	134265651	134266151	*	4.83	5.81	-0.37	6.18	1.85e-10	3.59e-09
chr1	62208179	62208679	*	7.25	8.13	4.59	3.54	1.86e-10	3.6e-09
chr22	44273621	44274121	*	5.78	6.63	3.49	3.14	1.87e-10	3.62e-09
chr10	79290972	79291472	*	5.96	6.82	3.53	3.29	1.88e-10	3.64e-09
chr17	74288596	74289096	*	8.33	9.16	6.09	3.07	1.89e-10	3.64e-09
chr8	142451424	142451924	*	6.38	7.24	3.92	3.32	1.9e-10	3.67e-09
chr6	168502112	168502612	*	5.78	6.62	3.52	3.11	1.91e-10	3.68e-09
chr17	74020896	74021396	*	6.74	7.58	4.53	3.05	1.92e-10	3.7e-09
chr2	190445408	190445908	*	5.38	6.32	1.9	4.41	1.93e-10	3.71e-09
chr1	62660569	62661069	*	5.32	6.19	2.72	3.48	1.94e-10	3.74e-09
chr1	25233840	25234340	*	6.23	7.06	4.03	3.03	1.95e-10	3.74e-09
chr17	75282189	75282689	*	5.23	6.12	2.54	3.58	1.95e-10	3.75e-09
chr22	45253390	45253890	*	5.89	6.81	2.83	3.98	1.97e-10	3.78e-09
chr7	158656437	158656937	*	5.62	6.5	3.01	3.49	2e-10	3.84e-09
chr1	156369895	156370395	*	6.05	6.86	4.01	2.85	2e-10	3.84e-09
chr16	3531506	3532006	*	6.1	6.94	3.86	3.08	2.01e-10	3.85e-09
chr12	57915862	57916362	*	5.44	6.34	2.51	3.83	2.02e-10	3.86e-09
chrX	49028646	49029146	*	4.92	5.9	-0.37	6.27	2.02e-10	3.87e-09
chr11	77739727	77740227	*	4.82	5.76	1.03	4.73	2.02e-10	3.87e-09
chr16	29320362	29320862	*	4.73	5.68	0.94	4.74	2.03e-10	3.88e-09
chr12	2985705	2986205	*	4.98	5.92	1.38	4.54	2.04e-10	3.89e-09
chr22	28398900	28399400	*	8.37	9.23	6.03	3.2	2.04e-10	3.89e-09
chr19	13702281	13702781	*	6.15	6.98	3.98	3	2.04e-10	3.89e-09
chr17	34948392	34948892	*	5.93	6.83	2.94	3.89	2.04e-10	3.89e-09
chr4	2427542	2428042	*	5.76	6.63	3.25	3.38	2.05e-10	3.91e-09
chr3	50340593	50341093	*	6.09	6.97	3.44	3.52	2.06e-10	3.92e-09
chr7	97840977	97841477	*	5.13	6.06	1.61	4.45	2.06e-10	3.93e-09
chr22	46384198	46384698	*	5.14	6.07	1.67	4.4	2.07e-10	3.94e-09
chr1	45982625	45983125	*	5.4	6.27	2.85	3.42	2.1e-10	3.98e-09
chr9	137144883	137145383	*	5.4	6.32	2.35	3.97	2.1e-10	3.98e-09
chr5	178737566	178738066	*	6.38	7.23	4.09	3.14	2.12e-10	4.02e-09
chr4	8594162	8594662	*	4.79	5.77	-0.37	6.14	2.13e-10	4.05e-09
chr17	26865965	26866465	*	4.73	5.68	0.77	4.91	2.14e-10	4.05e-09
chr11	1155943	1156443	*	5.44	6.31	2.99	3.32	2.14e-10	4.05e-09
chr11	76883061	76883561	*	5.43	6.36	1.9	4.46	2.14e-10	4.05e-09
chr15	62124296	62124796	*	6.46	7.27	4.43	2.84	2.14e-10	4.05e-09
chr4	3365941	3366441	*	5.7	6.55	3.36	3.19	2.14e-10	4.05e-09
chr1	7699875	7700375	*	5.74	6.61	3.12	3.49	2.18e-10	4.12e-09
chr18	19215587	19216087	*	4.98	5.88	2.06	3.82	2.19e-10	4.14e-09
chr11	72308560	72309060	*	5.82	6.68	3.41	3.27	2.22e-10	4.19e-09
chr7	1599371	1599871	*	8.54	9.35	6.56	2.78	2.25e-10	4.24e-09
chr16	823812	824312	*	4.65	5.62	0.3	5.32	2.26e-10	4.25e-09
chr20	35981054	35981554	*	6.11	7.01	3.25	3.76	2.26e-10	4.27e-09
chr15	66459082	66459582	*	4.63	5.58	0.71	4.87	2.28e-10	4.3e-09
chr17	17686344	17686844	*	5.91	6.74	3.73	3	2.29e-10	4.3e-09
chr6	71998695	71999195	*	7.33	8.12	5.41	2.72	2.29e-10	4.31e-09
chr14	105610353	105610853	*	5.32	6.2	2.71	3.5	2.3e-10	4.32e-09
chr11	100209572	100210072	*	5.63	6.54	2.54	4	2.31e-10	4.33e-09
chr19	3176903	3177403	*	4.78	5.76	-0.37	6.13	2.31e-10	4.34e-09
chr14	101034240	101034740	*	4.83	5.78	1.1	4.68	2.32e-10	4.35e-09
chr16	2982799	2983299	*	4.64	5.6	0.56	5.04	2.32e-10	4.35e-09
chr8	144463155	144463655	*	5.86	6.75	3.07	3.68	2.32e-10	4.35e-09
chr17	62040040	62040540	*	4.91	5.89	-0.37	6.26	2.35e-10	4.4e-09
chr11	2444976	2445476	*	5.14	6.02	2.46	3.56	2.35e-10	4.4e-09
chr17	48287112	48287612	*	6.14	6.96	3.98	2.98	2.36e-10	4.41e-09
chr10	80731611	80732111	*	5.6	6.5	2.76	3.74	2.39e-10	4.46e-09
chr17	3880889	3881389	*	4.81	5.79	-0.37	6.16	2.39e-10	4.46e-09
chr10	76994962	76995462	*	6.06	6.95	3.29	3.66	2.39e-10	4.47e-09
chr16	3115692	3116192	*	5.64	6.58	2.15	4.43	2.4e-10	4.47e-09
chr8	37749311	37749811	*	5.47	6.32	3.12	3.2	2.43e-10	4.54e-09
chr17	26859772	26860272	*	6.65	7.47	4.58	2.89	2.44e-10	4.54e-09
chr7	153585166	153585666	*	5.37	6.24	2.87	3.37	2.44e-10	4.54e-09
chr10	42725721	42726221	*	7.58	8.36	5.81	2.54	2.44e-10	4.55e-09
chr14	105513516	105514016	*	4.78	5.72	1.1	4.62	2.45e-10	4.56e-09
chr18	74897732	74898232	*	5.78	6.63	3.45	3.17	2.46e-10	4.57e-09
chr15	65645677	65646177	*	6.24	7.09	3.88	3.21	2.47e-10	4.59e-09
chr22	49852303	49852803	*	5.49	6.4	2.39	4.01	2.49e-10	4.63e-09
chr22	38840288	38840788	*	4.77	5.75	-0.37	6.12	2.49e-10	4.63e-09
chr12	96183287	96183787	*	5.75	6.58	3.54	3.04	2.5e-10	4.64e-09
chr10	132947043	132947543	*	6.15	6.96	4.15	2.82	2.51e-10	4.64e-09
chr9	137000574	137001074	*	4.6	5.55	0.76	4.79	2.56e-10	4.74e-09
chr11	72939074	72939574	*	7.05	7.85	5.06	2.8	2.57e-10	4.76e-09
chr11	49913786	49914286	*	4.83	5.81	-0.37	6.17	2.58e-10	4.78e-09
chr11	64603720	64604220	*	6.17	7.02	3.8	3.23	2.59e-10	4.78e-09
chr15	41252826	41253326	*	4.7	5.66	0.31	5.36	2.59e-10	4.78e-09
chr17	76244655	76245155	*	7.73	8.54	5.76	2.77	2.59e-10	4.79e-09
chr8	43390202	43390702	*	6.88	7.72	4.66	3.05	2.6e-10	4.79e-09
chr19	47541014	47541514	*	5.26	6.17	2.2	3.97	2.63e-10	4.84e-09
chr6	43473345	43473845	*	5.17	6.09	2.07	4.01	2.63e-10	4.85e-09
chr2	71691544	71692044	*	6.68	7.53	4.34	3.19	2.64e-10	4.86e-09
chr17	73504519	73505019	*	8.52	9.3	6.7	2.6	2.64e-10	4.86e-09
chr5	32154789	32155289	*	4.84	5.77	1.37	4.4	2.65e-10	4.87e-09
chr5	352762	353262	*	4.78	5.76	-0.37	6.12	2.65e-10	4.88e-09
chr4	1354410	1354910	*	4.63	5.59	0.31	5.29	2.65e-10	4.88e-09
chr17	1953382	1953882	*	6.4	7.32	3.2	4.12	2.66e-10	4.88e-09
chr16	57667719	57668219	*	5.76	6.61	3.39	3.22	2.66e-10	4.88e-09
chr1	46694168	46694668	*	5.33	6.24	2.3	3.94	2.69e-10	4.93e-09
chr20	62603729	62604229	*	6.05	6.9	3.72	3.18	2.7e-10	4.94e-09
chr22	31042242	31042742	*	4.75	5.73	-0.37	6.1	2.7e-10	4.95e-09
chr1	6656716	6657216	*	5.19	6.12	1.61	4.51	2.7e-10	4.95e-09
chr11	119560162	119560662	*	4.62	5.57	0.56	5.02	2.73e-10	4.99e-09
chr3	129330275	129330775	*	5.63	6.46	3.43	3.03	2.73e-10	4.99e-09
chr3	48605588	48606088	*	5.97	6.84	3.5	3.33	2.74e-10	5e-09
chr7	2164060	2164560	*	5.56	6.4	3.25	3.15	2.74e-10	5.01e-09
chr4	185394423	185394923	*	7.32	8.11	5.4	2.72	2.78e-10	5.07e-09
chr1	205544498	205544998	*	4.72	5.67	0.94	4.73	2.79e-10	5.09e-09
chr3	48619210	48619710	*	6.5	7.36	4.01	3.35	2.8e-10	5.1e-09
chr9	130882506	130883006	*	5.36	6.3	1.86	4.44	2.8e-10	5.1e-09
chr20	61913176	61913676	*	5.05	5.95	2.21	3.74	2.81e-10	5.12e-09
chr19	1295169	1295669	*	4.79	5.76	0.01	5.75	2.83e-10	5.14e-09
chr11	61501260	61501760	*	5.08	6.01	1.69	4.32	2.83e-10	5.14e-09
chr17	76768669	76769169	*	4.9	5.8	2.09	3.71	2.83e-10	5.14e-09
chr9	138577115	138577615	*	7.11	7.91	5.2	2.7	2.83e-10	5.15e-09
chr4	672989	673489	*	6.15	7.03	3.51	3.52	2.85e-10	5.18e-09
chr19	1129494	1129994	*	5.34	6.27	1.95	4.32	2.88e-10	5.22e-09
chr20	400406	400906	*	7.15	8.03	4.56	3.46	2.89e-10	5.23e-09
chr11	65407340	65407840	*	7.31	8.17	4.86	3.31	2.9e-10	5.25e-09
chr20	957754	958254	*	6.33	7.16	4.16	3	2.92e-10	5.29e-09
chr19	11511436	11511936	*	5.78	6.63	3.48	3.15	2.94e-10	5.32e-09
chr19	1325935	1326435	*	5.22	6.15	1.85	4.3	2.94e-10	5.33e-09
chr19	30007158	30007658	*	5.02	5.94	1.89	4.04	2.95e-10	5.34e-09
chr20	48901247	48901747	*	6.46	7.34	3.8	3.55	2.96e-10	5.34e-09
chr2	132429784	132430284	*	6.41	7.24	4.21	3.03	2.97e-10	5.36e-09
chr16	3065769	3066269	*	6.22	7.06	4.02	3.04	3e-10	5.4e-09
chr15	75485039	75485539	*	5.51	6.44	2.07	4.37	3.01e-10	5.42e-09
chr6	143862993	143863493	*	4.93	5.85	1.72	4.12	3.02e-10	5.44e-09
chr20	36790265	36790765	*	6.24	7.06	4.2	2.85	3.03e-10	5.46e-09
chr20	57543051	57543551	*	7.57	8.36	5.69	2.68	3.03e-10	5.46e-09
chr11	60609878	60610378	*	4.77	5.74	0.01	5.73	3.05e-10	5.49e-09
chr3	51993149	51993649	*	4.63	5.58	0.55	5.03	3.06e-10	5.49e-09
chr17	19895166	19895666	*	5.17	6.04	2.63	3.41	3.07e-10	5.51e-09
chr9	131794644	131795144	*	4.76	5.73	-0.37	6.1	3.08e-10	5.53e-09
chr9	126825396	126825896	*	5.25	6.17	2.05	4.12	3.11e-10	5.58e-09
chr16	88601489	88602483	*	5.64	6.57	2.36	4.21	3.11e-10	5.58e-09
chr17	74470027	74470527	*	4.85	5.83	-0.37	6.19	3.13e-10	5.6e-09
chr17	75390406	75390906	*	5.85	6.74	3.15	3.58	3.13e-10	5.61e-09
chr17	80891482	80891982	*	6.13	6.95	4.07	2.88	3.13e-10	5.61e-09
chr11	801453	801953	*	4.87	5.81	1.3	4.51	3.14e-10	5.62e-09
chr14	103023896	103024396	*	6.53	7.39	4.14	3.24	3.15e-10	5.64e-09
chr3	52267791	52268291	*	4.69	5.63	1.1	4.52	3.17e-10	5.66e-09
chr20	61048021	61048521	*	6.35	7.17	4.22	2.95	3.17e-10	5.66e-09
chr11	72421259	72421759	*	4.63	5.6	0.01	5.59	3.18e-10	5.67e-09
chr16	27324841	27325341	*	6.91	7.7	5.02	2.67	3.21e-10	5.73e-09
chr2	239947999	239948499	*	6.85	7.71	4.46	3.25	3.25e-10	5.79e-09
chr2	208031006	208031506	*	5.85	6.74	3.12	3.62	3.25e-10	5.79e-09
chr17	39902434	39902934	*	5.08	5.96	2.46	3.5	3.27e-10	5.83e-09
chr7	2577860	2578360	*	4.87	5.85	-0.37	6.22	3.27e-10	5.83e-09
chr16	1872270	1872770	*	6.78	7.62	4.59	3.02	3.28e-10	5.84e-09
chr3	52480390	52480890	*	4.75	5.69	1.32	4.36	3.29e-10	5.84e-09
chr1	1861040	1861540	*	5.13	6.01	2.5	3.51	3.3e-10	5.86e-09
chr9	137624465	137624965	*	4.82	5.8	-0.37	6.16	3.33e-10	5.91e-09
chr1	53392935	53393435	*	4.83	5.81	-0.37	6.18	3.33e-10	5.91e-09
chr6	39901816	39902316	*	6.44	7.34	3.44	3.91	3.36e-10	5.96e-09
chr6	31347808	31348308	*	5.3	6.18	2.64	3.53	3.36e-10	5.96e-09
chr17	21194705	21195205	*	6	6.84	3.75	3.09	3.38e-10	5.98e-09
chr2	27636518	27637018	*	4.58	5.53	0.71	4.82	3.39e-10	6e-09
chr12	680874	681374	*	7.64	8.45	5.63	2.82	3.42e-10	6.05e-09
chr11	66126860	66127360	*	5.97	6.84	3.48	3.36	3.43e-10	6.07e-09
chr9	138611435	138611935	*	5.23	6.1	2.63	3.47	3.45e-10	6.09e-09
chr17	74498122	74498622	*	4.95	5.88	1.56	4.33	3.46e-10	6.11e-09
chr3	52228310	52228810	*	5.66	6.52	3.31	3.21	3.47e-10	6.11e-09
chr2	95699777	95700277	*	5.79	6.71	2.64	4.07	3.47e-10	6.11e-09
chr1	41115646	41116146	*	6.96	7.79	4.76	3.03	3.48e-10	6.14e-09
chr17	3753882	3754382	*	5.54	6.42	2.92	3.5	3.5e-10	6.17e-09
chr19	18411525	18412025	*	4.81	5.79	-0.37	6.15	3.53e-10	6.22e-09
chr12	48347421	48347921	*	4.75	5.71	0.55	5.16	3.53e-10	6.22e-09
chr19	1665719	1666219	*	5.71	6.55	3.43	3.12	3.56e-10	6.27e-09
chr11	94277197	94277697	*	6.46	7.31	4.14	3.17	3.57e-10	6.28e-09
chr1	3161815	3162315	*	4.93	5.91	-0.37	6.27	3.61e-10	6.34e-09
chr15	40600192	40600692	*	4.76	5.74	-0.37	6.11	3.62e-10	6.36e-09
chr16	49916799	49917299	*	6.17	7	3.96	3.04	3.64e-10	6.39e-09
chr5	118406690	118407190	*	5.19	6.1	2.17	3.93	3.65e-10	6.4e-09
chr22	18602328	18602828	*	5.88	6.72	3.66	3.06	3.66e-10	6.41e-09
chr16	21554449	21554949	*	5	5.9	2.1	3.8	3.66e-10	6.42e-09
chr22	18961116	18961616	*	4.84	5.76	1.52	4.25	3.66e-10	6.42e-09
chr17	80227933	80228433	*	5.12	6.02	2.24	3.78	3.67e-10	6.43e-09
chr20	62072700	62073200	*	5.26	6.18	2.03	4.15	3.69e-10	6.45e-09
chr1	27238167	27238667	*	5.64	6.47	3.47	3	3.69e-10	6.45e-09
chr19	7953361	7953861	*	5.95	6.82	3.36	3.46	3.71e-10	6.48e-09
chr19	3203354	3203854	*	4.74	5.72	-0.37	6.08	3.73e-10	6.51e-09
chr11	72394923	72395423	*	5.27	6.16	2.59	3.57	3.73e-10	6.51e-09
chr15	73662720	73663220	*	6.12	7.02	3.21	3.81	3.75e-10	6.53e-09
chr19	43031509	43032009	*	4.61	5.58	0.01	5.57	3.75e-10	6.53e-09
chr19	18507189	18507689	*	5.61	6.52	2.65	3.87	3.76e-10	6.54e-09
chr16	85662825	85663325	*	5.21	6.12	2.19	3.94	3.77e-10	6.56e-09
chr1	16503849	16504349	*	4.74	5.72	-0.37	6.08	3.77e-10	6.56e-09
chr1	10917918	10918418	*	6.11	6.9	4.18	2.72	3.78e-10	6.57e-09
chr11	63918228	63918728	*	6.59	7.48	3.83	3.65	3.81e-10	6.61e-09
chr14	106199703	106200203	*	6.07	6.89	3.95	2.94	3.81e-10	6.62e-09
chr7	1424651	1425151	*	5.75	6.66	2.56	4.11	3.91e-10	6.79e-09
chr1	153674716	153675216	*	5.23	6.15	2.08	4.06	3.91e-10	6.79e-09
chr16	882471	883462	*	4.72	5.7	-0.37	6.06	3.96e-10	6.86e-09
chr22	42557414	42557914	*	5.68	6.6	2.44	4.16	3.98e-10	6.9e-09
chr2	120984226	120984726	*	4.75	5.73	-0.37	6.09	3.99e-10	6.91e-09
chr3	48460478	48460978	*	7.52	8.31	5.67	2.64	4.05e-10	7e-09
chr1	113165872	113166372	*	4.69	5.67	0.01	5.66	4.05e-10	7e-09
chr17	48877259	48877759	*	4.8	5.78	-0.37	6.14	4.06e-10	7.02e-09
chr19	38473295	38473795	*	4.96	5.85	2.1	3.76	4.07e-10	7.04e-09
chr5	10653325	10653825	*	6.58	7.48	3.64	3.84	4.08e-10	7.05e-09
chr20	35502342	35502842	*	5.21	6.12	2.11	4.01	4.09e-10	7.05e-09
chr3	40518619	40519119	*	4.72	5.66	1.03	4.63	4.1e-10	7.07e-09
chr19	16667263	16667763	*	5.09	5.98	2.34	3.64	4.18e-10	7.2e-09
chr17	76931815	76932315	*	6.12	6.94	4.08	2.85	4.18e-10	7.21e-09
chr3	128445260	128445760	*	5.77	6.67	2.87	3.8	4.19e-10	7.22e-09
chr9	129263939	129264439	*	4.72	5.67	0.94	4.73	4.2e-10	7.22e-09
chr9	20684410	20684910	*	6.21	7.07	3.76	3.31	4.21e-10	7.24e-09
chr22	31277731	31278231	*	4.76	5.71	0.94	4.77	4.24e-10	7.29e-09
chr17	17145802	17146302	*	4.66	5.61	0.77	4.84	4.24e-10	7.29e-09
chr20	62669724	62670224	*	5.62	6.48	3.18	3.3	4.26e-10	7.32e-09
chr2	241446738	241447238	*	7.88	8.71	5.7	3.01	4.29e-10	7.36e-09
chr16	2756073	2756573	*	5.36	6.27	2.23	4.04	4.29e-10	7.36e-09
chr16	84987554	84988054	*	4.68	5.63	0.95	4.68	4.31e-10	7.39e-09
chr19	55863396	55863896	*	6.78	7.58	4.79	2.8	4.33e-10	7.42e-09
chr17	16784142	16784642	*	4.99	5.92	1.56	4.37	4.33e-10	7.42e-09
chr19	54808503	54809003	*	6.07	6.88	4.09	2.79	4.34e-10	7.42e-09
chr8	143836029	143836529	*	4.63	5.58	0.76	4.82	4.35e-10	7.44e-09
chr9	136836198	136836698	*	4.66	5.62	0.56	5.07	4.35e-10	7.44e-09
chr5	159687447	159687947	*	5.46	6.36	2.65	3.7	4.4e-10	7.52e-09
chr11	75186550	75187050	*	4.68	5.61	1.32	4.28	4.45e-10	7.6e-09
chr16	87425210	87425710	*	6.31	7.12	4.26	2.86	4.46e-10	7.6e-09
chr2	128388756	128389256	*	6.05	6.85	4.04	2.81	4.47e-10	7.62e-09
chr22	20226021	20226521	*	4.76	5.72	0.31	5.41	4.48e-10	7.64e-09
chr9	139757568	139758068	*	5.03	5.96	1.62	4.33	4.48e-10	7.64e-09
chr14	106048874	106049374	*	5.91	6.81	2.97	3.85	4.5e-10	7.66e-09
chr20	25031504	25032004	*	4.86	5.8	1.1	4.7	4.53e-10	7.71e-09
chr4	2299384	2299884	*	5.08	5.99	2.05	3.94	4.54e-10	7.71e-09
chr19	1323024	1323524	*	4.91	5.83	1.72	4.11	4.56e-10	7.74e-09
chr11	48014921	48015421	*	4.55	5.51	0.3	5.21	4.56e-10	7.74e-09
chr18	74835659	74836159	*	4.81	5.76	1.03	4.73	4.58e-10	7.77e-09
chr22	25960959	25961459	*	5.46	6.38	2.3	4.08	4.58e-10	7.77e-09
chr15	42372992	42373492	*	4.7	5.65	0.95	4.7	4.59e-10	7.78e-09
chr20	31761393	31761893	*	5.58	6.45	3.03	3.41	4.61e-10	7.82e-09
chr1	25247902	25248402	*	6.24	7.1	3.8	3.3	4.62e-10	7.82e-09
chr3	13567802	13568302	*	6.93	7.72	5.01	2.71	4.63e-10	7.84e-09
chr12	8032417	8032917	*	6.05	6.95	3.08	3.87	4.65e-10	7.88e-09
chr7	97843375	97843875	*	7.68	8.54	5.17	3.37	4.67e-10	7.9e-09
chr7	1539765	1540265	*	6.88	7.7	4.85	2.85	4.68e-10	7.9e-09
chr16	68406460	68406960	*	6.34	7.17	4.21	2.95	4.68e-10	7.9e-09
chr2	112750653	112751153	*	4.7	5.67	-0.37	6.04	4.71e-10	7.95e-09
chr16	724264	724764	*	7.07	7.86	5.21	2.65	4.72e-10	7.97e-09
chr10	73641272	73641772	*	5.75	6.65	2.88	3.77	4.73e-10	7.98e-09
chr1	18990557	18991057	*	4.87	5.82	1.11	4.7	4.75e-10	8.01e-09
chr10	116075052	116075552	*	4.69	5.67	-0.37	6.04	4.76e-10	8.02e-09
chr11	9280474	9280974	*	5.18	6.06	2.45	3.62	4.77e-10	8.03e-09
chr9	140013668	140014168	*	5.22	6.14	1.95	4.19	4.8e-10	8.07e-09
chr17	18901191	18901691	*	5.65	6.53	2.98	3.55	4.8e-10	8.07e-09
chr17	74267570	74268070	*	4.72	5.67	0.76	4.91	4.82e-10	8.1e-09
chr14	105434200	105434700	*	5.51	6.41	2.6	3.81	4.83e-10	8.1e-09
chr1	227729919	227730419	*	8	8.81	5.96	2.85	4.9e-10	8.23e-09
chr11	61507509	61508009	*	6.09	6.92	3.91	3.01	4.94e-10	8.28e-09
chr5	137780748	137781248	*	7.13	7.94	5.12	2.82	4.98e-10	8.34e-09
chr22	38903908	38904408	*	5.7	6.61	2.61	4	5.01e-10	8.4e-09
chr15	68634671	68635171	*	5.43	6.3	2.86	3.44	5.04e-10	8.44e-09
chr22	38844785	38845285	*	4.72	5.7	-0.37	6.07	5.04e-10	8.44e-09
chr20	55192536	55193036	*	6.67	7.47	4.74	2.72	5.14e-10	8.59e-09
chr9	126148810	126149310	*	5.86	6.72	3.49	3.23	5.14e-10	8.59e-09
chr22	45103039	45103539	*	5.32	6.17	2.99	3.18	5.15e-10	8.6e-09
chr3	49200399	49200899	*	5.62	6.49	3.12	3.37	5.18e-10	8.65e-09
chr17	17255111	17255611	*	6.39	7.26	3.91	3.35	5.21e-10	8.7e-09
chr22	20003510	20004010	*	6.59	7.46	4.09	3.37	5.21e-10	8.7e-09
chr3	75718796	75719296	*	5.5	6.44	1.91	4.54	5.22e-10	8.7e-09
chr11	74951659	74952159	*	8.06	8.86	6.09	2.78	5.23e-10	8.71e-09
chr12	110062737	110063237	*	5.78	6.68	2.84	3.84	5.24e-10	8.73e-09
chr19	15490769	15491269	*	4.73	5.71	-0.37	6.08	5.27e-10	8.77e-09
chr9	136663801	136664301	*	4.6	5.56	0.56	5	5.29e-10	8.8e-09
chr20	34652975	34653475	*	6.79	7.65	4.38	3.27	5.34e-10	8.87e-09
chr1	10957928	10958428	*	6.46	7.3	4.2	3.1	5.36e-10	8.9e-09
chr12	125172150	125172650	*	4.86	5.84	-0.37	6.21	5.38e-10	8.93e-09
chr17	71468317	71468817	*	4.96	5.88	1.66	4.23	5.38e-10	8.93e-09
chr12	119617087	119617587	*	4.52	5.48	0.63	4.84	5.44e-10	9.03e-09
chr22	39549398	39549898	*	5.2	6.13	1.72	4.41	5.47e-10	9.08e-09
chr3	49030261	49030761	*	5.13	6.04	2.15	3.89	5.48e-10	9.08e-09
chr12	56870911	56871411	*	6.24	7.03	4.33	2.7	5.5e-10	9.1e-09
chr22	30103374	30103874	*	4.83	5.77	1.25	4.52	5.51e-10	9.12e-09
chr1	6302307	6302807	*	6.18	7.04	3.75	3.29	5.52e-10	9.13e-09
chr2	97167512	97168012	*	7.14	8	4.73	3.26	5.52e-10	9.13e-09
chr11	64035804	64036304	*	4.68	5.66	-0.37	6.03	5.53e-10	9.13e-09
chr12	123434728	123435228	*	5.1	5.99	2.36	3.63	5.61e-10	9.27e-09
chr19	12975898	12976398	*	4.7	5.68	-0.37	6.05	5.63e-10	9.3e-09
chr11	9357564	9358064	*	5.19	6.11	2.03	4.08	5.64e-10	9.3e-09
chr7	44366847	44367347	*	5.47	6.39	2.29	4.1	5.65e-10	9.32e-09
chr16	19017508	19018008	*	6	6.86	3.61	3.25	5.66e-10	9.33e-09
chr11	70066019	70066519	*	5.23	6.09	2.77	3.32	5.69e-10	9.37e-09
chr9	33598076	33598576	*	8.25	9.06	6.23	2.83	5.69e-10	9.37e-09
chr8	144343336	144343836	*	5.4	6.25	3.08	3.17	5.72e-10	9.41e-09
chrX	152673644	152674144	*	7.31	8.12	5.29	2.83	5.73e-10	9.42e-09
chr22	40043165	40043665	*	4.82	5.76	1.25	4.5	5.73e-10	9.42e-09
chr19	4322994	4323494	*	5.58	6.44	3.16	3.28	5.77e-10	9.47e-09
chr17	71397019	71397519	*	6.14	6.93	4.22	2.71	5.79e-10	9.51e-09
chr22	50754968	50755468	*	5.88	6.73	3.5	3.23	5.83e-10	9.56e-09
chr22	38142502	38143002	*	5.79	6.71	2.69	4.02	5.88e-10	9.64e-09
chr2	129062249	129062749	*	5.13	6.02	2.46	3.56	5.89e-10	9.66e-09
chr3	126471242	126471742	*	5.55	6.44	2.87	3.56	5.9e-10	9.66e-09
chr16	89702144	89702644	*	6.49	7.39	3.58	3.81	5.91e-10	9.68e-09
chr18	76625745	76626245	*	6.57	7.43	4.1	3.34	5.93e-10	9.71e-09
chr3	12858255	12858755	*	6.53	7.38	4.26	3.12	5.93e-10	9.71e-09
chr2	2239721	2240221	*	5.73	6.59	3.32	3.27	5.97e-10	9.77e-09
chr7	1639590	1640090	*	5.41	6.28	2.88	3.39	5.98e-10	9.78e-09
chr17	81025457	81025957	*	6.3	7.1	4.33	2.77	6e-10	9.8e-09
chr15	89545679	89546179	*	4.86	5.81	1.24	4.57	6.05e-10	9.87e-09
chr17	80061585	80062085	*	7.23	8.01	5.38	2.63	6.07e-10	9.9e-09
chr3	148847187	148847687	*	4.61	5.58	0.01	5.57	6.11e-10	9.97e-09
chr15	75014746	75015246	*	7.44	8.27	5.28	2.99	6.13e-10	9.99e-09
chr17	61622487	61622987	*	6.56	7.46	3.59	3.87	6.13e-10	9.99e-09
chr1	110662462	110662962	*	5.04	5.93	2.22	3.71	6.14e-10	1e-08
chr4	1758607	1759107	*	5.19	6.07	2.49	3.59	6.15e-10	1e-08
chr14	91639570	91640070	*	6.64	7.44	4.65	2.79	6.23e-10	1.01e-08
chr17	79208905	79209405	*	5.33	6.25	2.15	4.1	6.31e-10	1.03e-08
chr9	139487003	139487503	*	4.96	5.87	2	3.87	6.32e-10	1.03e-08
chr5	177962652	177963152	*	4.82	5.8	-0.37	6.16	6.33e-10	1.03e-08
chr11	764961	765461	*	5.3	6.21	2.27	3.94	6.33e-10	1.03e-08
chr2	241817846	241818346	*	4.68	5.66	-0.37	6.03	6.35e-10	1.03e-08
chr14	75372654	75373154	*	5.19	6.09	2.29	3.8	6.36e-10	1.03e-08
chr1	2368311	2368811	*	5.33	6.21	2.62	3.6	6.37e-10	1.03e-08
chr7	73452279	73452779	*	5.13	6.02	2.36	3.66	6.38e-10	1.03e-08
chr2	10968930	10969430	*	5.76	6.63	3.23	3.4	6.39e-10	1.03e-08
chr22	41104391	41104891	*	4.57	5.53	0.56	4.97	6.44e-10	1.04e-08
chr22	27049457	27049957	*	6.02	6.84	3.99	2.85	6.47e-10	1.05e-08
chr10	79641435	79641935	*	6.4	7.27	3.84	3.43	6.53e-10	1.06e-08
chr13	114908153	114908653	*	4.64	5.57	1.25	4.32	6.54e-10	1.06e-08
chr19	4706726	4707226	*	6.59	7.46	4.09	3.36	6.57e-10	1.06e-08
chr1	3393972	3394472	*	4.64	5.58	1.1	4.48	6.59e-10	1.06e-08
chr8	144423630	144424130	*	6.78	7.6	4.72	2.88	6.59e-10	1.06e-08
chr22	22646323	22646823	*	9.26	10.04	7.42	2.61	6.6e-10	1.06e-08
chr7	94138972	94139472	*	4.61	5.56	0.76	4.81	6.63e-10	1.07e-08
chr4	2050044	2050544	*	5.04	5.95	2.1	3.85	6.64e-10	1.07e-08
chr1	29446936	29447436	*	4.97	5.89	1.72	4.17	6.66e-10	1.07e-08
chr6	36792646	36793146	*	5.83	6.67	3.62	3.05	6.67e-10	1.07e-08
chr1	49145177	49145677	*	6.26	7.09	4.07	3.02	6.67e-10	1.07e-08
chr22	39571595	39572095	*	6.24	7.09	3.86	3.22	6.67e-10	1.07e-08
chr20	61583711	61584211	*	8.32	9.09	6.51	2.58	6.67e-10	1.07e-08
chr15	76603179	76603679	*	5.07	6	1.61	4.39	6.7e-10	1.07e-08
chr17	19647871	19648371	*	4.67	5.65	-0.37	6.02	6.77e-10	1.09e-08
chr7	65542736	65543236	*	4.87	5.8	1.54	4.26	6.8e-10	1.09e-08
chr20	31914876	31915376	*	5.66	6.5	3.4	3.1	6.8e-10	1.09e-08
chr20	48873160	48873660	*	6.12	6.96	3.81	3.16	6.81e-10	1.09e-08
chr1	201417295	201417795	*	7.16	7.95	5.31	2.63	6.81e-10	1.09e-08
chr9	139029060	139029560	*	4.59	5.52	1.11	4.41	6.82e-10	1.09e-08
chr7	1004880	1005380	*	6.09	6.9	4.05	2.85	6.82e-10	1.09e-08
chr10	71870859	71871359	*	5.31	6.21	2.34	3.88	6.85e-10	1.09e-08
chr9	136515051	136515551	*	5.57	6.44	3.08	3.36	6.86e-10	1.1e-08
chr10	73201965	73202465	*	4.76	5.71	1.03	4.68	6.86e-10	1.1e-08
chr9	95784463	95784963	*	5.12	6.02	2.15	3.87	6.87e-10	1.1e-08
chr16	67768895	67769395	*	6.09	6.91	3.98	2.93	6.9e-10	1.1e-08
chr1	26859501	26860001	*	4.71	5.69	-0.37	6.05	6.96e-10	1.11e-08
chr17	79654124	79654624	*	4.62	5.59	0.01	5.58	6.99e-10	1.11e-08
chr8	144223889	144224389	*	6.67	7.54	4.19	3.35	6.99e-10	1.11e-08
chr10	134611596	134612096	*	5.46	6.3	3.2	3.1	7.02e-10	1.12e-08
chr17	78925458	78925958	*	6.3	7.2	3.39	3.81	7.02e-10	1.12e-08
chr14	75051215	75051715	*	6	6.83	3.78	3.05	7.05e-10	1.12e-08
chr15	66208211	66208711	*	4.67	5.65	-0.37	6.02	7.17e-10	1.14e-08
chr2	10918331	10918831	*	7.24	8.07	5.09	2.98	7.19e-10	1.14e-08
chr1	32126724	32127224	*	4.73	5.71	-0.37	6.07	7.22e-10	1.15e-08
chr12	52680864	52681364	*	5.94	6.82	3.25	3.58	7.28e-10	1.16e-08
chr19	10008117	10008617	*	5.72	6.55	3.61	2.94	7.32e-10	1.16e-08
chr14	102884197	102884697	*	4.49	5.45	0.55	4.9	7.33e-10	1.16e-08
chr17	37243745	37244245	*	4.77	5.72	0.94	4.78	7.36e-10	1.17e-08
chr16	69517	70017	*	4.58	5.55	0.01	5.54	7.39e-10	1.17e-08
chr16	1838809	1839309	*	6.91	7.74	4.76	2.98	7.41e-10	1.17e-08
chr12	124882028	124882528	*	5.48	6.34	3.06	3.28	7.44e-10	1.18e-08
chr7	44613651	44614151	*	5.02	5.92	2.05	3.88	7.48e-10	1.18e-08
chr8	142383368	142383868	*	4.89	5.81	1.62	4.2	7.48e-10	1.18e-08
chr9	95981070	95981570	*	4.84	5.76	1.62	4.14	7.58e-10	1.2e-08
chr22	39531014	39531514	*	4.7	5.65	0.95	4.7	7.58e-10	1.2e-08
chr15	74594905	74595405	*	5.74	6.59	3.4	3.19	7.64e-10	1.2e-08
chr16	85315688	85316188	*	4.84	5.78	1.39	4.39	7.66e-10	1.21e-08
chr5	1176440	1176940	*	5.61	6.48	2.99	3.49	7.68e-10	1.21e-08
chr17	73841018	73841518	*	5.39	6.26	2.86	3.4	7.71e-10	1.21e-08
chr3	47485039	47485539	*	5.41	6.33	2.24	4.09	7.75e-10	1.22e-08
chr11	60850412	60850912	*	5.3	6.21	2.29	3.91	7.77e-10	1.22e-08
chr11	71164203	71164703	*	4.98	5.89	2.02	3.87	7.84e-10	1.23e-08
chr8	124212617	124213117	*	5.3	6.2	2.41	3.78	7.86e-10	1.23e-08
chr9	136545385	136545885	*	5.59	6.45	3.15	3.3	7.9e-10	1.24e-08
chr9	132804692	132805192	*	4.7	5.68	-0.37	6.05	7.97e-10	1.25e-08
chr22	44615422	44615922	*	5.5	6.34	3.21	3.13	7.97e-10	1.25e-08
chr3	126727541	126728041	*	4.62	5.6	-0.37	5.97	7.99e-10	1.25e-08
chr22	47008997	47009497	*	5.77	6.64	3.27	3.37	8.05e-10	1.26e-08
chr22	24108957	24109457	*	4.89	5.81	1.61	4.21	8.1e-10	1.27e-08
chr22	39664826	39665326	*	4.65	5.63	-0.37	6	8.13e-10	1.27e-08
chr10	134612910	134613410	*	4.51	5.46	0.55	4.92	8.15e-10	1.28e-08
chr1	19908618	19909118	*	6.2	7.02	4.07	2.95	8.23e-10	1.29e-08
chr7	98452533	98453033	*	6.67	7.46	4.73	2.74	8.24e-10	1.29e-08
chr17	55520815	55521315	*	5.92	6.74	3.81	2.94	8.24e-10	1.29e-08
chr16	67917884	67918384	*	4.63	5.61	-0.37	5.97	8.28e-10	1.29e-08
chr3	194799544	194800044	*	4.52	5.48	0.5	4.98	8.29e-10	1.29e-08
chr6	160390439	160390939	*	5.98	6.89	2.94	3.95	8.3e-10	1.29e-08
chr12	50263389	50263889	*	4.77	5.69	1.45	4.24	8.31e-10	1.29e-08
chr16	615034	615534	*	5.21	6.14	1.81	4.33	8.32e-10	1.3e-08
chr1	153569711	153570211	*	4.64	5.62	-0.37	5.98	8.36e-10	1.3e-08
chr9	124378990	124379490	*	5.66	6.5	3.46	3.04	8.38e-10	1.3e-08
chr3	138178452	138178952	*	4.65	5.58	1.27	4.31	8.41e-10	1.31e-08
chr5	528640	529140	*	7.04	7.88	4.81	3.08	8.42e-10	1.31e-08
chr19	33727332	33727832	*	4.63	5.61	-0.37	5.97	8.42e-10	1.31e-08
chr6	157543276	157543776	*	4.62	5.6	-0.37	5.96	8.44e-10	1.31e-08
chr1	18956048	18956548	*	6.97	7.78	4.97	2.81	8.47e-10	1.32e-08
chr17	43870499	43870999	*	4.64	5.59	0.79	4.8	8.61e-10	1.34e-08
chr19	45664438	45664938	*	5.18	6.06	2.59	3.47	8.66e-10	1.34e-08
chr10	7910103	7910603	*	6.48	7.27	4.65	2.61	8.68e-10	1.35e-08
chr11	17582975	17583475	*	4.7	5.62	1.48	4.14	8.68e-10	1.35e-08
chr3	47027035	47027535	*	4.57	5.5	1.17	4.34	8.71e-10	1.35e-08
chr14	105271395	105271895	*	4.71	5.68	-0.37	6.05	8.79e-10	1.36e-08
chr19	589354	589854	*	4.68	5.6	1.38	4.22	8.8e-10	1.36e-08
chr10	8198781	8199281	*	6.35	7.22	3.81	3.41	8.81e-10	1.36e-08
chr2	3132591	3133091	*	4.52	5.48	0.13	5.35	8.89e-10	1.37e-08
chr22	42689453	42689953	*	5.93	6.8	3.41	3.39	8.95e-10	1.38e-08
chr7	158062687	158063187	*	4.76	5.69	1.47	4.21	8.98e-10	1.39e-08
chr14	104683810	104684310	*	4.62	5.59	-0.37	5.96	8.99e-10	1.39e-08
chr14	105171915	105172415	*	7.47	8.3	5.34	2.96	9.03e-10	1.39e-08
chr2	233190399	233190899	*	8.75	9.51	7.01	2.51	9.07e-10	1.4e-08
chr1	200977131	200977631	*	4.7	5.67	-0.37	6.04	9.16e-10	1.41e-08
chr11	73106439	73106939	*	7.42	8.27	5.07	3.2	9.26e-10	1.43e-08
chr19	33746883	33747383	*	6.61	7.42	4.54	2.88	9.3e-10	1.43e-08
chr1	179852055	179852555	*	5.53	6.41	2.91	3.5	9.3e-10	1.43e-08
chr18	43657851	43658351	*	5.67	6.51	3.47	3.04	9.38e-10	1.44e-08
chr22	43650315	43650815	*	4.78	5.74	0.56	5.18	9.41e-10	1.45e-08
chr4	3296447	3296947	*	5.2	6.1	2.26	3.85	9.43e-10	1.45e-08
chr8	136468891	136469391	*	6.18	7.02	3.97	3.05	9.44e-10	1.45e-08
chr2	10503901	10504401	*	6.24	7.06	4.17	2.89	9.48e-10	1.45e-08
chr7	75666784	75667284	*	5.71	6.53	3.61	2.92	9.49e-10	1.45e-08
chr9	139648567	139649067	*	4.64	5.62	-0.37	5.99	9.52e-10	1.46e-08
chr16	3627237	3627737	*	4.56	5.51	0.55	4.96	9.53e-10	1.46e-08
chr6	158126049	158126549	*	5.36	6.25	2.57	3.67	9.54e-10	1.46e-08
chr16	67927293	67927793	*	7.14	7.98	4.83	3.15	9.59e-10	1.47e-08
chr15	65074241	65074741	*	4.53	5.5	0.01	5.49	9.66e-10	1.48e-08
chr2	2166081	2166581	*	4.89	5.8	1.9	3.9	9.66e-10	1.48e-08
chr2	91961058	91961558	*	4.64	5.62	0.01	5.6	9.69e-10	1.48e-08
chr2	130669865	130670365	*	7.09	7.91	5	2.91	9.69e-10	1.48e-08
chr11	46355490	46355990	*	4.77	5.7	1.43	4.27	9.78e-10	1.49e-08
chr10	100227786	100228286	*	6.02	6.84	3.95	2.89	9.8e-10	1.5e-08
chr17	77108758	77109258	*	6.33	7.12	4.42	2.71	9.94e-10	1.52e-08
chr1	201066620	201067120	*	5.16	6.07	2.11	3.97	1e-09	1.52e-08
chr11	44620506	44621006	*	4.62	5.55	1	4.55	1e-09	1.52e-08
chr4	3778069	3778569	*	4.56	5.5	1.13	4.37	1.01e-09	1.53e-08
chr11	64909567	64910067	*	4.64	5.62	-0.37	5.98	1.01e-09	1.53e-08
chr13	112980524	112981024	*	5.97	6.87	3.02	3.85	1.01e-09	1.53e-08
chr1	156071938	156072438	*	5.05	5.95	2.08	3.87	1.01e-09	1.54e-08
chr11	72539195	72539695	*	6.52	7.32	4.61	2.71	1.02e-09	1.54e-08
chr5	137779362	137779862	*	4.52	5.48	0.3	5.18	1.03e-09	1.57e-08
chr12	6346643	6347143	*	4.67	5.61	1.03	4.58	1.03e-09	1.57e-08
chr17	18926106	18926606	*	5.87	6.68	3.85	2.83	1.04e-09	1.57e-08
chr19	48616616	48617116	*	5.76	6.6	3.52	3.08	1.04e-09	1.57e-08
chr3	58048633	58049133	*	4.85	5.78	1.42	4.36	1.04e-09	1.57e-08
chr10	774597	775097	*	7.53	8.34	5.5	2.84	1.04e-09	1.57e-08
chr9	95402583	95403083	*	5.84	6.72	3.2	3.52	1.04e-09	1.58e-08
chr12	56274328	56274828	*	5.28	6.19	2.25	3.94	1.05e-09	1.58e-08
chr15	75114177	75114677	*	4.53	5.49	0.13	5.36	1.05e-09	1.59e-08
chr19	13256441	13256941	*	4.96	5.87	1.86	4.01	1.05e-09	1.59e-08
chr9	130828621	130829121	*	6.7	7.49	4.81	2.68	1.05e-09	1.59e-08
chr14	105612480	105612980	*	6.52	7.4	3.97	3.43	1.05e-09	1.59e-08
chr5	132583748	132584248	*	7.47	8.25	5.64	2.61	1.05e-09	1.59e-08
chr16	415807	416307	*	4.6	5.53	1.31	4.22	1.06e-09	1.59e-08
chr16	4847355	4847855	*	5.21	6.06	2.88	3.18	1.06e-09	1.6e-08
[truncated: 28,159 more rows]

## Sheet: Veh vs  17β-E2(10nM).
seqnames	start	end	strand	Conc	Conc_17b_10nm	Conc_VEH	Fold	p.value	FDR
chr14	105628659	105629159	*	8.6	9.58	2.64	6.95	6.43e-38	1.52e-33
chr18	73415768	73416268	*	8.53	9.5	4.14	5.36	1.01e-37	1.52e-33
chr8	143065404	143065904	*	9.18	10.13	5.17	4.96	4.68e-33	4.7e-29
chr19	45852367	45852867	*	7.7	8.69	1.83	6.86	1.12e-31	8.45e-28
chr22	20243535	20244035	*	7.46	8.45	1.48	6.97	3.07e-30	1.85e-26
chr8	144657828	144658328	*	8.36	9.31	4.45	4.86	7.68e-30	3.86e-26
chr11	74021803	74022303	*	7.84	8.78	4.04	4.74	1.14e-29	4.91e-26
chr3	12329610	12330110	*	7.73	8.69	3.57	5.12	1.81e-29	6.16e-26
chr7	1270854	1271354	*	7.21	8.19	2.12	6.08	1.84e-29	6.16e-26
chr19	55685317	55685817	*	7.15	8.12	2.13	5.99	3.9e-29	1.18e-25
chr1	1342742	1343242	*	7.45	8.43	2.64	5.79	1.04e-28	2.86e-25
chr16	598403	598903	*	7.7	8.67	3.12	5.55	3.51e-28	8.83e-25
chr7	2671730	2672230	*	8.55	9.48	5.17	4.32	6.96e-28	1.61e-24
chr19	30364024	30364524	*	7.68	8.63	3.79	4.84	7.75e-28	1.67e-24
chr16	33956929	33957429	*	8.24	9.17	4.86	4.31	8.29e-28	1.67e-24
chr15	68849526	68850026	*	7.35	8.29	3.58	4.71	1.47e-27	2.76e-24
chr10	5726664	5727164	*	7.48	8.43	3.37	5.06	5.77e-27	1.02e-23
chr9	130516978	130517478	*	7.99	8.95	3.91	5.05	6.53e-27	1.09e-23
chr14	106083255	106083755	*	7.09	8.07	1.99	6.08	9.57e-27	1.52e-23
chr17	37773961	37774461	*	7.53	8.51	2.21	6.3	2.61e-26	3.93e-23
chr11	67033011	67033511	*	7.14	8.1	3.26	4.84	3.81e-26	5.48e-23
chr6	3751623	3752123	*	8.05	8.99	4.64	4.34	8.44e-26	1.16e-22
chr6	166795428	166795928	*	6.91	7.89	1.4	6.5	8.99e-26	1.18e-22
chr7	91763953	91764453	*	7	7.98	2.04	5.94	1.39e-25	1.75e-22
chr12	109250649	109251149	*	6.86	7.83	2.44	5.39	1.63e-25	1.96e-22
chr19	55953829	55954329	*	7.03	8.01	1.85	6.17	3.23e-25	3.75e-22
chr5	893133	893633	*	7.45	8.38	3.89	4.49	3.51e-25	3.92e-22
chr1	21948548	21949048	*	7.92	8.87	4	4.87	3.97e-25	4.28e-22
chr19	3203997	3204497	*	6.89	7.87	2.06	5.81	5.21e-25	5.42e-22
chr17	79410314	79410814	*	7.03	8.01	1.33	6.68	6.29e-25	6.32e-22
chr17	57970598	57971098	*	6.94	7.92	1.77	6.15	7.89e-25	7.67e-22
chr19	16142340	16142840	*	7.82	8.75	4.42	4.33	8.97e-25	8.46e-22
chr1	10733996	10734496	*	7.23	8.18	3.42	4.75	1.19e-24	1.06e-21
chr12	52267189	52267689	*	6.89	7.88	1.2	6.68	1.2e-24	1.06e-21
chr19	35491116	35491616	*	6.98	7.95	1.87	6.09	1.25e-24	1.07e-21
chr16	2568575	2569075	*	7.52	8.44	4.27	4.17	3.02e-24	2.5e-21
chr1	36273896	36274396	*	7.05	8.04	1.59	6.45	3.09e-24	2.5e-21
chr14	101345219	101345719	*	6.8	7.74	3.11	4.63	3.15e-24	2.5e-21
chr2	241405146	241405646	*	7.46	8.4	3.82	4.58	3.85e-24	2.98e-21
chr17	30629900	30630400	*	7.8	8.72	4.66	4.06	4.16e-24	3.14e-21
chr19	5783296	5783796	*	6.83	7.79	2.46	5.34	4.87e-24	3.58e-21
chr17	62066383	62066883	*	6.73	7.7	2.16	5.54	6.16e-24	4.34e-21
chr16	2524309	2524809	*	6.97	7.96	1.59	6.37	6.19e-24	4.34e-21
chr19	41117995	41118495	*	8.22	9.15	4.63	4.53	6.71e-24	4.6e-21
chr22	38084688	38085188	*	7.29	8.22	3.93	4.29	6.98e-24	4.68e-21
chr22	23628211	23628711	*	6.95	7.9	3.18	4.72	8.21e-24	5.38e-21
chr22	41865083	41865583	*	6.89	7.88	0.83	7.05	8.68e-24	5.57e-21
chr22	45824471	45824971	*	7.17	8.11	3.47	4.64	9.12e-24	5.69e-21
chr22	23412511	23413011	*	8.79	9.69	5.83	3.86	9.24e-24	5.69e-21
chr1	53874087	53874587	*	6.71	7.69	0.84	6.86	1.08e-23	6.42e-21
chr20	60895731	60896231	*	8.02	8.93	4.97	3.97	1.09e-23	6.42e-21
chr22	43544562	43545062	*	7.43	8.37	3.85	4.53	2.04e-23	1.18e-20
chr22	50495801	50496301	*	7.8	8.72	4.63	4.08	2.25e-23	1.28e-20
chr17	42835617	42836117	*	7.3	8.27	2.57	5.7	2.33e-23	1.3e-20
chr11	66495334	66495834	*	6.66	7.63	1.89	5.74	3.8e-23	2.08e-20
chr10	80972603	80973103	*	6.92	7.88	2.91	4.97	4.02e-23	2.16e-20
chr5	150004653	150005153	*	6.69	7.66	2.07	5.59	5.21e-23	2.75e-20
chr10	134809722	134810222	*	7.47	8.41	3.97	4.44	5.58e-23	2.9e-20
chr3	47619295	47619795	*	7.03	8.01	2.15	5.86	5.72e-23	2.92e-20
chr17	79268445	79268945	*	6.82	7.8	1.58	6.23	6.01e-23	3.02e-20
chr22	46528616	46529116	*	6.6	7.56	2.13	5.43	6.3e-23	3.11e-20
chr7	44572923	44573423	*	6.57	7.55	1.42	6.13	7.08e-23	3.45e-20
chr19	51843222	51843722	*	7.29	8.23	3.64	4.59	9.73e-23	4.58e-20
chr7	5328990	5329490	*	6.49	7.47	1.29	6.18	9.83e-23	4.58e-20
chr17	76265667	76266167	*	6.64	7.62	1.32	6.3	9.87e-23	4.58e-20
chr17	73739716	73740216	*	6.63	7.61	1.75	5.86	1.2e-22	5.49e-20
chr21	45235744	45236244	*	6.91	7.86	3.26	4.6	2e-22	8.88e-20
chr17	39823451	39823951	*	6.95	7.9	3.1	4.8	2e-22	8.88e-20
chr12	5726094	5726594	*	6.96	7.91	3.01	4.9	2.16e-22	9.43e-20
chr17	72876911	72877411	*	6.49	7.47	1.37	6.1	2.29e-22	9.86e-20
chr1	3002277	3002777	*	7.37	8.29	4.09	4.2	2.5e-22	1.06e-19
chr1	31196295	31196795	*	7.93	8.85	4.82	4.03	2.75e-22	1.15e-19
chr12	122238156	122238656	*	6.82	7.75	3.24	4.52	2.85e-22	1.18e-19
chr1	51795933	51796433	*	7.56	8.49	4.13	4.36	3e-22	1.22e-19
chr8	59465408	59465908	*	6.9	7.85	3.08	4.78	3.17e-22	1.28e-19
chr1	16368217	16368717	*	7.69	8.65	3.5	5.16	3.45e-22	1.37e-19
chr5	665006	665506	*	7.79	8.7	4.77	3.93	3.63e-22	1.42e-19
chr3	125844761	125845261	*	6.67	7.63	2.4	5.23	3.69e-22	1.43e-19
chr7	1481062	1481562	*	8.3	9.22	5.17	4.05	3.8e-22	1.45e-19
chr6	693619	694119	*	6.49	7.46	1.89	5.57	4.21e-22	1.59e-19
chr16	75273419	75273919	*	7.08	8.01	3.59	4.42	4.31e-22	1.61e-19
chr3	48610367	48610867	*	6.5	7.48	0.83	6.65	4.37e-22	1.61e-19
chr22	50244149	50244649	*	6.64	7.61	2.15	5.46	4.61e-22	1.67e-19
chr11	67784694	67785194	*	7.96	8.86	5.09	3.77	5.6e-22	2.01e-19
chr11	9685618	9686118	*	6.69	7.66	2.07	5.59	5.73e-22	2.03e-19
chr2	46926335	46926835	*	6.94	7.91	2.37	5.54	6.78e-22	2.38e-19
chr22	50242826	50243326	*	6.39	7.35	2.44	4.9	7.53e-22	2.59e-19
chr8	143500015	143500515	*	7.53	8.44	4.45	3.98	7.57e-22	2.59e-19
chr4	1761899	1762399	*	6.92	7.86	3.44	4.42	8.57e-22	2.9e-19
chr19	989380	989880	*	7.35	8.28	3.94	4.35	8.75e-22	2.93e-19
chr5	14582161	14582661	*	6.76	7.71	2.99	4.72	1.03e-21	3.41e-19
chr8	144094803	144095303	*	6.36	7.34	1.33	6.01	1.15e-21	3.79e-19
chr1	65720255	65720755	*	7.2	8.14	3.58	4.56	1.24e-21	4.03e-19
chr17	77385949	77386449	*	6.67	7.61	3.06	4.55	1.61e-21	5.16e-19
chr1	228327958	228328458	*	7.13	8.05	3.78	4.27	1.73e-21	5.49e-19
chr2	131850462	131850962	*	8.19	9.1	5.1	4	1.76e-21	5.53e-19
chr8	143554028	143554528	*	6.89	7.82	3.38	4.45	2.73e-21	8.49e-19
chr19	7917713	7918213	*	6.26	7.22	2	5.22	3.07e-21	9.46e-19
chr11	65293712	65294212	*	8.32	9.22	5.4	3.82	3.42e-21	1.04e-18
chr17	2615433	2615933	*	7.38	8.31	4.01	4.31	3.55e-21	1.07e-18
chr3	127371859	127372359	*	7.01	7.95	3.44	4.51	3.66e-21	1.09e-18
chr22	46506450	46506950	*	6.89	7.81	3.72	4.09	3.7e-21	1.09e-18
chr16	68278472	68278972	*	6.6	7.58	1.59	5.99	3.86e-21	1.13e-18
chr17	60781038	60781538	*	7.86	8.83	3.13	5.7	4.16e-21	1.21e-18
chr21	46740941	46741441	*	6.42	7.4	1.32	6.08	4.38e-21	1.26e-18
chr22	19462200	19462700	*	6.98	7.92	3.21	4.72	4.61e-21	1.31e-18
chr17	4462264	4462764	*	6.55	7.52	1.58	5.95	4.77e-21	1.33e-18
chr16	2111498	2111998	*	6.34	7.32	1.69	5.63	4.81e-21	1.33e-18
chr16	851546	852046	*	6.73	7.69	2.36	5.33	4.81e-21	1.33e-18
chr2	220417435	220417935	*	7.5	8.42	4.4	4.01	5.19e-21	1.42e-18
chr8	142443521	142444021	*	6.9	7.84	3.24	4.61	5.26e-21	1.43e-18
chr20	3002550	3003050	*	6.41	7.36	2.45	4.91	5.62e-21	1.51e-18
chr8	27527987	27528487	*	6.4	7.38	1.04	6.34	5.74e-21	1.52e-18
chr8	22433995	22434495	*	7.18	8.09	4.13	3.96	5.74e-21	1.52e-18
chr7	2353469	2353969	*	6.35	7.32	1.7	5.61	6.13e-21	1.61e-18
chr16	89784006	89784506	*	6.96	7.9	3.42	4.47	6.25e-21	1.63e-18
chr16	701543	702043	*	6.44	7.43	1.1	6.32	7.18e-21	1.85e-18
chr17	79096749	79097249	*	6.66	7.6	2.87	4.74	7.64e-21	1.94e-18
chr11	65292495	65292995	*	8.6	9.53	5.32	4.21	7.66e-21	1.94e-18
chr16	89251066	89251566	*	6.78	7.72	3.22	4.5	8.53e-21	2.14e-18
chr17	75296833	75297333	*	7.94	8.86	4.74	4.12	1e-20	2.49e-18
chr19	36269066	36269566	*	6.21	7.19	1.34	5.84	1.06e-20	2.62e-18
chr8	142329127	142329627	*	9.62	10.53	6.53	4	1.09e-20	2.67e-18
chr16	3213380	3213880	*	6.17	7.13	1.71	5.43	1.28e-20	3.11e-18
chr9	139520059	139520559	*	7.28	8.21	3.87	4.34	1.53e-20	3.69e-18
chr22	24166219	24166719	*	6.22	7.2	1.46	5.74	1.71e-20	4.09e-18
chr2	10206202	10206702	*	7.14	8.03	4.3	3.73	1.94e-20	4.62e-18
chr20	62689345	62689845	*	6.4	7.38	0.83	6.55	2.02e-20	4.76e-18
chr20	61163488	61163988	*	6.47	7.42	2.66	4.76	2.39e-20	5.58e-18
chr14	75536292	75536792	*	6.8	7.73	3.33	4.4	2.43e-20	5.64e-18
chr19	1158746	1159246	*	6.91	7.84	3.5	4.34	2.48e-20	5.66e-18
chr1	1840041	1840541	*	6.76	7.73	2.3	5.42	2.48e-20	5.66e-18
chr7	101006987	101007487	*	6.51	7.49	1.59	5.9	2.54e-20	5.76e-18
chr10	46993618	46994118	*	6.6	7.55	2.5	5.05	2.69e-20	6.06e-18
chr19	51628864	51629364	*	6.54	7.53	0.38	7.15	2.71e-20	6.06e-18
chr7	1399672	1400172	*	6.8	7.72	3.58	4.14	2.84e-20	6.29e-18
chr20	61675346	61675846	*	8.11	9	5.32	3.68	2.89e-20	6.35e-18
chr19	18060714	18061214	*	6.27	7.25	1.01	6.23	3.08e-20	6.74e-18
chr7	73402343	73402843	*	6.5	7.43	3.23	4.2	3.34e-20	7.24e-18
chr19	18699489	18699989	*	6.49	7.42	3.07	4.35	3.46e-20	7.46e-18
chr22	25800713	25801213	*	7.56	8.49	4.27	4.21	3.67e-20	7.85e-18
chr8	98881523	98882023	*	6.6	7.57	1.9	5.68	3.87e-20	8.22e-18
chr17	78080976	78081476	*	7.13	8.03	4.18	3.85	3.99e-20	8.41e-18
chr9	139727874	139728374	*	6.45	7.41	2.34	5.06	4.86e-20	1.02e-17
chr9	99328687	99329187	*	6.54	7.5	2.26	5.25	4.93e-20	1.03e-17
chr19	3820610	3821110	*	7.12	8.06	3.54	4.52	5.21e-20	1.08e-17
chr15	69591089	69591589	*	6.33	7.29	1.92	5.38	5.25e-20	1.08e-17
chr19	2060984	2061484	*	6.69	7.63	3.27	4.35	6.89e-20	1.4e-17
chr16	3067431	3067931	*	6.34	7.32	1.32	5.99	7.32e-20	1.48e-17
chr18	14334458	14334958	*	6.91	7.82	3.76	4.06	7.44e-20	1.5e-17
chr16	2255945	2256445	*	7.29	8.19	4.45	3.74	7.54e-20	1.51e-17
chr1	153467572	153468072	*	6.01	6.98	1.6	5.38	8.75e-20	1.74e-17
chr16	85321760	85322260	*	6.18	7.16	0.83	6.33	9.05e-20	1.78e-17
chr2	233511648	233512148	*	6.26	7.22	1.99	5.24	9.76e-20	1.91e-17
chr16	67707129	67707629	*	6.95	7.85	4	3.85	9.85e-20	1.92e-17
chr20	62134233	62134733	*	6.27	7.22	2.6	4.62	1.08e-19	2.09e-17
chr5	748761	749261	*	6.72	7.68	2.37	5.31	1.17e-19	2.24e-17
chr11	61528000	61528500	*	7.65	8.59	4.15	4.43	1.2e-19	2.28e-17
chr2	224903410	224903910	*	7.44	8.34	4.41	3.93	1.21e-19	2.3e-17
chr1	228561021	228561521	*	6.02	7	1.18	5.82	1.22e-19	2.3e-17
chr7	98970215	98970715	*	7	7.89	4.14	3.75	1.55e-19	2.9e-17
chr5	49505	50005	*	8.75	9.67	5.67	4	1.63e-19	3.03e-17
chr19	39219412	39219912	*	7.67	8.6	4.27	4.33	1.67e-19	3.09e-17
chr16	85715906	85716406	*	7.25	8.18	3.81	4.37	1.73e-19	3.19e-17
chr22	36957539	36958039	*	6.82	7.76	3.16	4.59	1.8e-19	3.29e-17
chr9	140056577	140057077	*	7.08	8.04	2.98	5.07	1.83e-19	3.32e-17
chr2	133025469	133025969	*	8.04	8.98	4.43	4.55	1.86e-19	3.36e-17
chr13	113688754	113689254	*	6.38	7.32	2.81	4.51	1.91e-19	3.43e-17
chr11	47371289	47371789	*	7.1	8.03	3.65	4.38	2.12e-19	3.78e-17
chr8	142433345	142433845	*	6.25	7.23	1.01	6.22	2.19e-19	3.86e-17
chr20	61874468	61874968	*	6.89	7.81	3.76	4.05	2.19e-19	3.86e-17
chr8	144309591	144310091	*	6.74	7.65	3.69	3.96	2.23e-19	3.92e-17
chr19	292363	292863	*	6.32	7.26	2.8	4.45	2.25e-19	3.93e-17
chr11	67173355	67173855	*	8.17	9.08	5.04	4.04	2.44e-19	4.23e-17
chr1	32660523	32661023	*	7.51	8.43	4.33	4.09	2.48e-19	4.28e-17
chr11	6624500	6625000	*	6.85	7.77	3.65	4.13	2.6e-19	4.45e-17
chr17	76274651	76275151	*	6.82	7.75	3.34	4.41	2.61e-19	4.45e-17
chr22	50345784	50346284	*	6.73	7.67	3.26	4.4	2.66e-19	4.49e-17
chr17	73234114	73234614	*	6.9	7.81	3.91	3.9	2.66e-19	4.49e-17
chr22	20192541	20193041	*	6.89	7.8	3.77	4.03	2.77e-19	4.62e-17
chr5	132784631	132785131	*	6.33	7.26	2.91	4.35	2.77e-19	4.62e-17
chr19	5030119	5030619	*	6.67	7.63	2.79	4.84	2.81e-19	4.66e-17
chr17	80548662	80549162	*	6.52	7.44	3.2	4.25	2.99e-19	4.91e-17
chr8	143332952	143333452	*	7.53	8.42	4.69	3.73	3e-19	4.91e-17
chr9	140328105	140328605	*	6.18	7.16	0.86	6.3	3.14e-19	5.11e-17
chr22	49556371	49556871	*	7.86	8.75	5.09	3.66	3.27e-19	5.28e-17
chr20	61942796	61943296	*	7.85	8.76	4.77	3.99	3.27e-19	5.28e-17
chr17	80170895	80171395	*	6.22	7.17	2.39	4.78	3.3e-19	5.29e-17
chr2	234726526	234727026	*	6.5	7.44	2.91	4.53	3.46e-19	5.52e-17
chr17	74522421	74522921	*	6.23	7.22	0.62	6.59	3.57e-19	5.67e-17
chr1	2245067	2245567	*	6.93	7.84	3.93	3.9	3.71e-19	5.86e-17
chr17	30592434	30592934	*	7.65	8.53	4.95	3.58	3.78e-19	5.94e-17
chr4	1769305	1769805	*	6.36	7.31	2.4	4.91	3.84e-19	6e-17
chr16	617049	617549	*	6.29	7.25	2.11	5.14	3.95e-19	6.13e-17
chr1	1468406	1468906	*	6.16	7.13	1.69	5.44	3.96e-19	6.13e-17
chr3	52418429	52418929	*	7.17	8.07	4.33	3.74	4.11e-19	6.33e-17
chr7	566356	566856	*	6.59	7.5	3.55	3.95	4.56e-19	6.98e-17
chr2	71215191	71215691	*	6.14	7.11	1.1	6.01	4.69e-19	7.15e-17
chr16	2586259	2586759	*	7.01	7.91	4.13	3.78	4.85e-19	7.35e-17
chr10	73380212	73380712	*	6.95	7.9	3.07	4.83	4.91e-19	7.4e-17
chr19	50909659	50910159	*	7.44	8.36	4.11	4.25	4.97e-19	7.46e-17
chr1	1092069	1092569	*	6.64	7.55	3.57	3.97	5.29e-19	7.9e-17
chr12	125576994	125577494	*	6.71	7.62	3.65	3.97	5.55e-19	8.22e-17
chr7	44646427	44646927	*	6.22	7.2	0.83	6.37	5.56e-19	8.22e-17
chr6	11737612	11738112	*	7.26	8.18	4.11	4.07	5.6e-19	8.23e-17
chr22	50351213	50351713	*	6.61	7.54	3.38	4.16	5.71e-19	8.35e-17
chr12	132338702	132339202	*	6.15	7.13	1.01	6.11	5.73e-19	8.35e-17
chr17	41855850	41856350	*	6.7	7.64	3.08	4.56	5.81e-19	8.43e-17
chr11	76917085	76917585	*	6.17	7.12	2.24	4.88	5.91e-19	8.48e-17
chr15	44281908	44282408	*	7.44	8.35	4.39	3.96	5.93e-19	8.48e-17
chr6	168135663	168136163	*	8.52	9.42	5.59	3.83	5.93e-19	8.48e-17
chr21	47422134	47422634	*	6.15	7.09	2.47	4.62	5.99e-19	8.52e-17
chr12	50422386	50422886	*	6.15	7.09	2.52	4.57	6.18e-19	8.74e-17
chr11	69390796	69391296	*	5.98	6.93	2.03	4.9	6.37e-19	8.98e-17
chr2	29272467	29272967	*	6.4	7.36	2.23	5.13	6.55e-19	9.19e-17
chr16	85636270	85636770	*	6.39	7.33	2.71	4.61	6.67e-19	9.31e-17
chr19	45667902	45668402	*	6.39	7.35	2.15	5.2	6.74e-19	9.36e-17
chr22	50690298	50690798	*	6.35	7.32	1.58	5.74	7.02e-19	9.68e-17
chr22	19737234	19737734	*	8.39	9.31	5.13	4.19	7.03e-19	9.68e-17
chr12	122670143	122670643	*	5.96	6.93	1.32	5.61	7.32e-19	1e-16
chr18	76814608	76815108	*	5.94	6.92	1.18	5.74	7.34e-19	1e-16
chr8	144637548	144638048	*	8.13	9.03	5.21	3.82	7.36e-19	1e-16
chr16	1829955	1830455	*	6.2	7.16	2.02	5.13	7.51e-19	1.02e-16
chr7	2472041	2472541	*	6.11	7.09	1.32	5.77	7.55e-19	1.02e-16
chr4	184365246	184365746	*	6.81	7.74	3.47	4.27	7.61e-19	1.02e-16
chr11	67399913	67400413	*	6.38	7.34	2.23	5.12	7.86e-19	1.05e-16
chr22	46449509	46450009	*	6.24	7.19	2.56	4.63	7.92e-19	1.05e-16
chr5	546363	546863	*	7.02	7.92	4.09	3.83	8.56e-19	1.13e-16
chr20	61699057	61699557	*	6.4	7.31	3.29	4.02	8.61e-19	1.13e-16
chr18	77143718	77144218	*	7.43	8.35	4.24	4.11	8.73e-19	1.15e-16
chr22	42218428	42218928	*	6.44	7.41	1.8	5.61	9.46e-19	1.23e-16
chr19	7594436	7594936	*	6.59	7.53	2.92	4.62	1.01e-18	1.32e-16
chr17	43095839	43096339	*	7.6	8.5	4.71	3.79	1.05e-18	1.36e-16
chr16	11767168	11767668	*	6.22	7.2	0.57	6.63	1.15e-18	1.49e-16
chr19	7991863	7992363	*	6.67	7.57	3.72	3.85	1.17e-18	1.5e-16
chr1	1837594	1838094	*	6.53	7.49	2.52	4.97	1.23e-18	1.57e-16
chr17	81027832	81028332	*	7.42	8.35	4.05	4.29	1.45e-18	1.84e-16
chr14	65701341	65701841	*	5.95	6.92	1.4	5.52	1.45e-18	1.84e-16
chr11	2144146	2144646	*	6.68	7.63	2.73	4.9	1.48e-18	1.87e-16
chr2	241325147	241325647	*	6.26	7.22	1.94	5.28	1.53e-18	1.93e-16
chr22	19708365	19708865	*	6.45	7.37	3.15	4.22	1.74e-18	2.18e-16
chr22	36833183	36833683	*	6.37	7.28	3.36	3.92	1.99e-18	2.48e-16
chr19	1483820	1484320	*	5.83	6.79	1.55	5.24	2e-18	2.48e-16
chr8	143707649	143708149	*	6.89	7.85	2.96	4.88	2.01e-18	2.49e-16
chr22	37701723	37702223	*	6.05	7.02	1.31	5.71	2.26e-18	2.78e-16
chr22	38477857	38478357	*	7.68	8.58	4.76	3.82	2.29e-18	2.8e-16
chr22	46448690	46449190	*	6.14	7.11	1.33	5.78	2.41e-18	2.94e-16
chr7	2508372	2508872	*	7.11	8	4.37	3.63	2.49e-18	3.03e-16
chr10	43601242	43601742	*	5.91	6.88	1.52	5.36	2.5e-18	3.03e-16
chr8	144472219	144472719	*	9.15	10.05	6.21	3.84	2.66e-18	3.21e-16
chr1	51778058	51778558	*	7.31	8.24	4.01	4.23	2.67e-18	3.21e-16
chr7	1582630	1583130	*	5.96	6.94	1.01	5.93	2.74e-18	3.27e-16
chr15	22502610	22503110	*	5.95	6.93	0.84	6.09	2.83e-18	3.38e-16
chr1	33815605	33816105	*	6.28	7.24	1.96	5.28	2.89e-18	3.43e-16
chr2	219289059	219289559	*	5.9	6.87	1.24	5.63	2.93e-18	3.47e-16
chr9	139560195	139560695	*	6.98	7.98	-0.29	8.27	2.99e-18	3.52e-16
chr1	110752172	110752672	*	6.79	7.71	3.65	4.06	3.03e-18	3.55e-16
chr10	43870960	43871460	*	6	6.97	1.32	5.65	3.16e-18	3.7e-16
chr9	133281037	133281537	*	6.9	7.84	3.36	4.47	3.61e-18	4.2e-16
chr9	37422627	37423127	*	6.16	7.1	2.46	4.64	3.68e-18	4.25e-16
chr2	240076625	240077125	*	8.34	9.22	5.69	3.52	3.68e-18	4.25e-16
chr16	88919888	88920388	*	6.31	7.22	3.2	4.02	3.88e-18	4.47e-16
chr21	46412426	46412926	*	6.5	7.41	3.5	3.91	4.01e-18	4.6e-16
chr5	533616	534116	*	6.04	7.02	1.1	5.91	4.22e-18	4.82e-16
chr17	73835791	73836291	*	5.93	6.89	1.8	5.09	4.32e-18	4.91e-16
chr3	10377021	10377521	*	6.94	7.89	3.13	4.76	4.41e-18	5e-16
chr8	143377933	143378433	*	6.68	7.64	2.5	5.14	4.52e-18	5.1e-16
chr20	61714917	61715417	*	5.95	6.92	1.02	5.9	4.63e-18	5.21e-16
chr19	42497885	42498385	*	6.07	7.03	1.89	5.14	4.96e-18	5.56e-16
chr16	87874822	87875322	*	6.64	7.54	3.79	3.75	4.99e-18	5.58e-16
chr19	14076545	14077045	*	6.66	7.6	3.17	4.42	5.13e-18	5.7e-16
chr8	145647610	145648110	*	6.59	7.54	2.68	4.86	5.46e-18	6.05e-16
chr20	62070206	62070706	*	6.47	7.42	2.67	4.75	5.57e-18	6.15e-16
chr15	77320051	77320551	*	6.7	7.7	-0.29	7.99	5.61e-18	6.16e-16
chr7	47679016	47679516	*	7.51	8.38	4.96	3.42	5.62e-18	6.16e-16
chr12	3443626	3444126	*	7.11	8.04	3.69	4.35	5.7e-18	6.23e-16
chr17	73839872	73840372	*	6.2	7.16	1.99	5.17	6.05e-18	6.59e-16
chr5	6508008	6508508	*	7.79	8.7	4.73	3.96	6.34e-18	6.88e-16
chr19	51293967	51294467	*	6.25	7.24	0.08	7.16	6.42e-18	6.92e-16
chr10	70748526	70749026	*	6.67	7.64	2.14	5.5	6.44e-18	6.92e-16
chr22	18917752	18918252	*	6.02	6.97	1.95	5.02	6.45e-18	6.92e-16
chr8	144950022	144950522	*	7.51	8.41	4.7	3.71	6.48e-18	6.93e-16
chr8	142219185	142219685	*	7.59	8.5	4.51	3.99	6.52e-18	6.95e-16
chr12	1999647	2000147	*	6.81	7.71	3.91	3.81	6.57e-18	6.98e-16
chr15	40763294	40763794	*	6.46	7.38	3.27	4.11	6.69e-18	7.06e-16
chr12	133043245	133043745	*	7.55	8.45	4.63	3.82	6.71e-18	7.06e-16
chr2	241330673	241331173	*	6.01	6.99	1.02	5.96	6.71e-18	7.06e-16
chr19	18577146	18577646	*	6.08	7.01	2.56	4.45	7.1e-18	7.44e-16
chr8	142355954	142356454	*	7.51	8.42	4.35	4.08	7.26e-18	7.58e-16
chr1	2527579	2528079	*	6.05	7.02	1.58	5.44	7.89e-18	8.2e-16
chr17	17762491	17762991	*	5.99	6.95	1.92	5.03	7.96e-18	8.25e-16
chr7	2518201	2518701	*	6	6.98	0.9	6.08	8.04e-18	8.31e-16
chr11	68704186	68704686	*	6.72	7.65	3.41	4.24	8.21e-18	8.45e-16
chr2	133014595	133015095	*	6.62	7.53	3.69	3.83	8.88e-18	9.11e-16
chr20	61152001	61152501	*	6.14	7.13	0.38	6.75	8.91e-18	9.11e-16
chr20	61695529	61696029	*	6.69	7.6	3.73	3.86	8.95e-18	9.11e-16
chr17	17584759	17585259	*	8.63	9.51	6.01	3.5	9.4e-18	9.54e-16
chr2	176045642	176046142	*	6.11	7.03	2.88	4.15	9.49e-18	9.6e-16
chr16	85525186	85525686	*	6.87	7.79	3.62	4.17	9.52e-18	9.6e-16
chr11	70509633	70510133	*	5.94	6.91	1.42	5.48	9.78e-18	9.83e-16
chr20	61938651	61939151	*	5.99	6.96	1.1	5.86	9.95e-18	9.97e-16
chr16	70717276	70717776	*	6.78	7.66	4.09	3.57	9.98e-18	9.97e-16
chr1	9404792	9405292	*	5.89	6.87	0.62	6.25	1.09e-17	1.09e-15
chr14	105804745	105805245	*	7.33	8.22	4.57	3.65	1.14e-17	1.13e-15
chr22	46504730	46505230	*	7.19	8.1	4.18	3.92	1.18e-17	1.16e-15
chr8	144417128	144417628	*	8.32	9.2	5.68	3.52	1.22e-17	1.2e-15
chr8	143690506	143691006	*	6.25	7.19	2.72	4.47	1.32e-17	1.3e-15
chr22	35706068	35706568	*	6.11	7.06	2.13	4.94	1.35e-17	1.32e-15
chr20	49206956	49207456	*	5.84	6.81	1.18	5.62	1.37e-17	1.33e-15
chr11	65367379	65367879	*	6.07	7.02	2.15	4.87	1.37e-17	1.34e-15
chr5	179125800	179126300	*	6.21	7.17	1.7	5.47	1.48e-17	1.44e-15
chr19	995064	995564	*	5.81	6.78	1.46	5.32	1.53e-17	1.48e-15
chr4	2364762	2365262	*	5.97	6.92	2.06	4.86	1.55e-17	1.49e-15
chr10	81196321	81196821	*	7.2	8.08	4.59	3.5	1.76e-17	1.69e-15
chr19	42830073	42830573	*	5.83	6.81	0.84	5.97	1.76e-17	1.69e-15
chr19	4120819	4121319	*	5.81	6.77	1.6	5.17	1.77e-17	1.69e-15
chr9	101558348	101558848	*	6.15	7.09	2.52	4.57	1.78e-17	1.7e-15
chr17	46958237	46958737	*	6.29	7.23	2.59	4.65	1.81e-17	1.72e-15
chr17	80597451	80597951	*	7.45	8.33	4.84	3.48	1.87e-17	1.77e-15
chr8	145655241	145655741	*	8.05	8.92	5.52	3.41	1.94e-17	1.83e-15
chr7	75623487	75623987	*	6.38	7.32	2.73	4.59	1.97e-17	1.85e-15
chr22	50326564	50327064	*	7.5	8.42	4.3	4.12	2.11e-17	1.98e-15
chr17	76337237	76337737	*	6.6	7.5	3.79	3.71	2.16e-17	2.02e-15
chr20	25228131	25228631	*	6.6	7.53	3.25	4.28	2.18e-17	2.03e-15
chr1	151773211	151773711	*	6	6.98	0.57	6.41	2.27e-17	2.11e-15
chr1	2446211	2446711	*	6.3	7.22	3.02	4.21	2.46e-17	2.28e-15
chr1	985664	986164	*	6.13	7.08	2.23	4.85	2.51e-17	2.31e-15
chr15	42173257	42173757	*	6.13	7.06	2.75	4.3	2.52e-17	2.31e-15
chr11	65793952	65794452	*	6.56	7.48	3.25	4.23	2.86e-17	2.61e-15
chr15	69590243	69590743	*	6.03	7	1.49	5.5	2.86e-17	2.61e-15
chr16	2033568	2034068	*	5.89	6.85	1.58	5.27	2.89e-17	2.64e-15
chr15	65028314	65028814	*	7.45	8.36	4.49	3.87	3.07e-17	2.79e-15
chr22	45341502	45342002	*	6.18	7.09	3.14	3.95	3.14e-17	2.84e-15
chr7	73388679	73389179	*	5.95	6.88	2.47	4.42	3.3e-17	2.98e-15
chr7	37960324	37960824	*	7.3	8.2	4.36	3.84	3.35e-17	3.02e-15
chr10	134021348	134021848	*	5.97	6.93	1.61	5.32	3.46e-17	3.1e-15
chr19	5805228	5805728	*	6.99	7.91	3.94	3.96	3.55e-17	3.17e-15
chr22	20108096	20108596	*	7.65	8.57	4.39	4.18	3.68e-17	3.28e-15
chr1	153333136	153333636	*	7.78	8.66	5.04	3.63	3.69e-17	3.28e-15
chr17	48626826	48627326	*	7.91	8.83	4.66	4.17	3.73e-17	3.31e-15
chr11	67040683	67041183	*	6.24	7.16	3.04	4.11	3.76e-17	3.33e-15
chr9	139877811	139878311	*	7.87	8.74	5.25	3.5	3.83e-17	3.38e-15
chr11	67059532	67060032	*	6.33	7.24	3.34	3.9	4.02e-17	3.53e-15
chr22	36544619	36545119	*	6.06	6.99	2.67	4.32	4.26e-17	3.74e-15
chr22	39151495	39151995	*	7.18	8.1	4.04	4.05	4.29e-17	3.75e-15
chr16	2208234	2208734	*	5.83	6.78	2.13	4.64	4.3e-17	3.75e-15
chr19	18557785	18558285	*	7.41	8.31	4.56	3.74	4.43e-17	3.85e-15
chr9	139231761	139232261	*	5.87	6.84	0.98	5.87	4.47e-17	3.87e-15
chr20	61907167	61907667	*	6.92	7.84	3.77	4.07	4.48e-17	3.88e-15
chr15	66902484	66902984	*	6.79	7.66	4.25	3.41	4.6e-17	3.96e-15
chr8	145643170	145643670	*	6.21	7.13	2.94	4.19	4.66e-17	4.01e-15
chr19	1155172	1155672	*	5.94	6.91	1.32	5.59	4.75e-17	4.07e-15
chr16	2391329	2391829	*	9.32	10.22	6.42	3.8	4.81e-17	4.11e-15
chr22	28209606	28210106	*	5.75	6.72	0.98	5.75	4.97e-17	4.23e-15
chr1	150521981	150522481	*	8.59	9.45	6.09	3.37	5.09e-17	4.32e-15
chr17	73615644	73616144	*	5.77	6.71	2.02	4.7	5.35e-17	4.54e-15
chr10	134728879	134729379	*	5.87	6.83	1.66	5.17	5.46e-17	4.61e-15
chr19	3094738	3095238	*	6.97	7.87	4.02	3.84	5.56e-17	4.69e-15
chr3	51997754	51998254	*	5.91	6.86	1.98	4.88	5.61e-17	4.71e-15
chr19	33667411	33667911	*	6.1	7.07	1.58	5.49	5.64e-17	4.72e-15
chr12	131500943	131501443	*	6.43	7.38	2.67	4.71	5.67e-17	4.74e-15
chr8	143895755	143896255	*	8.1	8.95	5.7	3.25	5.71e-17	4.76e-15
chr19	40361077	40361577	*	7.59	8.5	4.45	4.06	6.08e-17	5.05e-15
chr19	51265206	51265706	*	6.16	7.11	2.36	4.75	6.28e-17	5.2e-15
chr14	105899498	105899998	*	5.97	6.93	1.86	5.07	6.31e-17	5.21e-15
chr11	64137181	64137681	*	5.88	6.87	0.48	6.39	6.33e-17	5.21e-15
chr22	38132848	38133348	*	7.25	8.13	4.66	3.46	6.36e-17	5.23e-15
chr7	100047997	100048497	*	6.31	7.23	3.11	4.12	6.38e-17	5.23e-15
chr1	236227708	236228208	*	6.78	7.67	3.94	3.73	6.42e-17	5.25e-15
chr2	42795717	42796217	*	6.08	7.02	2.55	4.47	6.5e-17	5.3e-15
chr2	134877602	134878102	*	6.54	7.45	3.59	3.86	6.88e-17	5.59e-15
chr2	130672578	130673078	*	8.56	9.47	5.65	3.81	6.91e-17	5.59e-15
chr17	48241620	48242120	*	6.4	7.3	3.53	3.77	6.92e-17	5.59e-15
chr1	156086931	156087431	*	6.09	7.06	1.8	5.26	7.1e-17	5.72e-15
chr1	2795375	2795875	*	5.85	6.83	0.83	6	7.16e-17	5.76e-15
chr20	3682353	3682853	*	5.79	6.76	1.09	5.67	7.2e-17	5.78e-15
chr14	69026054	69026554	*	6.01	6.94	2.67	4.27	7.36e-17	5.88e-15
chr19	19646024	19646524	*	6.79	7.68	4.03	3.66	7.41e-17	5.91e-15
chr4	3504390	3504890	*	7.6	8.48	5.02	3.46	7.44e-17	5.92e-15
chr20	60941675	60942175	*	6.53	7.53	-0.29	7.82	7.51e-17	5.96e-15
chr1	917052	917552	*	7.9	8.79	5.23	3.55	7.55e-17	5.98e-15
chr7	2443283	2443783	*	6.53	7.52	-0.29	7.82	7.58e-17	5.98e-15
chr14	69726877	69727377	*	7.36	8.25	4.61	3.63	8.02e-17	6.31e-15
chr5	542440	542940	*	7.06	7.99	3.69	4.29	8.07e-17	6.34e-15
chr22	36594805	36595305	*	6.82	7.73	3.7	4.03	8.2e-17	6.42e-15
chr19	54849364	54849864	*	5.79	6.77	1.02	5.74	8.57e-17	6.69e-15
chr10	104411549	104412049	*	6.79	7.7	3.75	3.95	8.59e-17	6.69e-15
chr16	28614652	28615152	*	5.79	6.76	0.84	5.92	8.88e-17	6.9e-15
chr4	6330939	6331439	*	7.78	8.66	5.18	3.48	9.27e-17	7.19e-15
chr5	180015473	180015973	*	5.71	6.66	2.03	4.63	9.7e-17	7.5e-15
chr10	72438101	72438601	*	5.71	6.67	1.34	5.33	9.73e-17	7.5e-15
chr11	76902962	76903462	*	6.47	7.37	3.55	3.83	9.97e-17	7.67e-15
chr19	56047262	56047762	*	6.96	7.83	4.35	3.49	9.99e-17	7.67e-15
chr1	7024086	7024586	*	6.49	7.38	3.67	3.71	1.01e-16	7.74e-15
chr16	11680372	11680872	*	5.78	6.76	0.62	6.14	1.02e-16	7.74e-15
chr1	31192373	31192873	*	5.78	6.74	1.57	5.17	1.02e-16	7.74e-15
chr16	608431	608931	*	5.8	6.75	1.99	4.76	1.07e-16	8.12e-15
chr20	61592417	61592917	*	5.67	6.63	1.38	5.25	1.07e-16	8.12e-15
chr22	50220561	50221061	*	7.18	8.13	3.42	4.71	1.09e-16	8.21e-15
chr16	89033977	89034477	*	5.7	6.68	0.84	5.84	1.09e-16	8.21e-15
chr16	81812835	81813335	*	5.87	6.83	1.72	5.11	1.11e-16	8.3e-15
chr1	111742513	111743013	*	5.72	6.68	1.3	5.38	1.11e-16	8.3e-15
chr19	2255686	2256186	*	7.57	8.47	4.62	3.85	1.11e-16	8.31e-15
chr1	31654344	31654844	*	5.87	6.84	1.33	5.51	1.13e-16	8.42e-15
chr21	45726211	45726711	*	6.29	7.23	2.56	4.68	1.16e-16	8.61e-15
chr1	155294386	155294886	*	6.49	7.4	3.38	4.03	1.19e-16	8.83e-15
chr19	15442694	15443194	*	6.65	7.6	2.9	4.7	1.25e-16	9.27e-15
chr7	151083001	151083501	*	6.23	7.14	3.2	3.94	1.26e-16	9.32e-15
chr14	104009700	104010200	*	6.49	7.44	2.6	4.84	1.27e-16	9.36e-15
chr16	3063164	3063664	*	7.32	8.19	4.76	3.43	1.3e-16	9.55e-15
chr9	129423257	129423757	*	6.16	7.13	1.79	5.34	1.31e-16	9.6e-15
chr16	70692818	70693318	*	6.09	7.05	1.79	5.26	1.32e-16	9.64e-15
chr3	52547761	52548261	*	6.19	7.16	1.79	5.37	1.33e-16	9.74e-15
chr22	23792512	23793012	*	6.32	7.24	3.09	4.15	1.39e-16	1.01e-14
chr11	65319064	65319564	*	7.93	8.83	5.03	3.81	1.4e-16	1.02e-14
chr17	48922964	48923464	*	6.95	7.83	4.27	3.56	1.43e-16	1.04e-14
chr16	1087588	1088088	*	6.52	7.42	3.61	3.81	1.45e-16	1.05e-14
chr19	36207504	36208004	*	7.45	8.35	4.5	3.85	1.47e-16	1.06e-14
chr19	35760122	35760622	*	6.18	7.09	3.15	3.94	1.51e-16	1.09e-14
chr8	142241156	142241656	*	6.45	7.35	3.46	3.89	1.56e-16	1.12e-14
chr8	142379384	142379884	*	6.5	7.41	3.49	3.92	1.58e-16	1.13e-14
chr11	67044532	67045032	*	6.52	7.41	3.75	3.66	1.61e-16	1.15e-14
chr20	37499588	37500088	*	5.65	6.62	1.04	5.58	1.61e-16	1.15e-14
chr22	21310875	21311375	*	5.65	6.61	1.23	5.38	1.62e-16	1.15e-14
chr19	17359106	17359606	*	6.62	7.56	3.13	4.43	1.68e-16	1.19e-14
chr17	26826754	26827254	*	6.3	7.21	3.17	4.04	1.69e-16	1.2e-14
chr16	87885545	87886045	*	6.24	7.16	3.07	4.08	1.69e-16	1.2e-14
chr5	6477111	6477611	*	6.98	7.85	4.46	3.4	1.7e-16	1.2e-14
chr1	41837724	41838224	*	6.82	7.75	3.38	4.37	1.71e-16	1.2e-14
chr19	7795142	7795642	*	6.62	7.52	3.61	3.92	1.73e-16	1.22e-14
chr9	137207682	137208182	*	6.54	7.5	2.48	5.02	1.8e-16	1.26e-14
chr9	137533756	137534256	*	6.75	7.69	3.23	4.45	2.03e-16	1.42e-14
chr19	18577973	18578473	*	5.8	6.75	1.9	4.84	2.05e-16	1.43e-14
chr7	102067200	102067700	*	6.45	7.34	3.7	3.64	2.1e-16	1.46e-14
chr16	733771	734271	*	6.89	7.76	4.42	3.34	2.15e-16	1.49e-14
chr19	42794023	42794523	*	5.82	6.78	1.61	5.16	2.16e-16	1.49e-14
chr5	1241327	1241827	*	5.76	6.74	0.63	6.11	2.27e-16	1.56e-14
chr20	2774641	2775141	*	6.11	7.05	2.41	4.64	2.34e-16	1.61e-14
chr11	553298	553798	*	5.73	6.68	1.78	4.9	2.46e-16	1.69e-14
chr11	47373378	47373878	*	6.28	7.24	2.36	4.88	2.61e-16	1.79e-14
chr8	143533860	143534360	*	6.4	7.39	-0.29	7.69	2.61e-16	1.79e-14
chr22	37579254	37579754	*	6.79	7.7	3.84	3.86	2.74e-16	1.87e-14
chr9	129460599	129461099	*	5.89	6.86	1.31	5.55	2.83e-16	1.93e-14
chr7	1460971	1461471	*	6.95	7.85	3.99	3.86	2.84e-16	1.93e-14
chr20	33590496	33590996	*	6.26	7.22	1.93	5.29	2.87e-16	1.94e-14
chr16	711400	711900	*	5.65	6.62	0.83	5.79	2.9e-16	1.96e-14
chr19	59097723	59098223	*	5.92	6.84	2.69	4.15	3.03e-16	2.04e-14
chr16	2889977	2890477	*	5.63	6.59	1.46	5.13	3.14e-16	2.11e-14
chr9	129294551	129295051	*	5.73	6.71	0.83	5.88	3.15e-16	2.12e-14
chr22	50964728	50965228	*	7.56	8.45	4.74	3.71	3.21e-16	2.15e-14
chr19	41726936	41727436	*	6.03	6.99	1.8	5.19	3.24e-16	2.17e-14
chr7	2668077	2668577	*	5.69	6.66	0.83	5.83	3.26e-16	2.18e-14
chr11	111170075	111170575	*	6.85	7.79	3.34	4.45	3.32e-16	2.21e-14
chr1	1134667	1135167	*	6.88	7.78	4.01	3.78	3.33e-16	2.21e-14
chr16	81322332	81322832	*	5.62	6.6	0.83	5.77	3.36e-16	2.23e-14
chr1	33361024	33361524	*	5.74	6.69	1.81	4.89	3.46e-16	2.29e-14
chr1	31906330	31906830	*	7.52	8.43	4.52	3.91	3.47e-16	2.29e-14
chr1	7830957	7831457	*	5.67	6.63	1.57	5.06	3.49e-16	2.3e-14
chr17	42856402	42856902	*	5.66	6.61	1.74	4.87	3.54e-16	2.33e-14
chr11	75871548	75872048	*	5.86	6.78	2.49	4.29	3.62e-16	2.37e-14
chr9	139409545	139410045	*	5.78	6.76	0.79	5.97	3.68e-16	2.4e-14
chr9	139585556	139586056	*	7.02	7.9	4.35	3.55	3.68e-16	2.4e-14
chr15	42127196	42127696	*	6.45	7.39	2.74	4.65	3.73e-16	2.43e-14
chr3	125775432	125775932	*	7.4	8.26	4.93	3.33	3.74e-16	2.43e-14
chr3	127262868	127263368	*	7.05	7.93	4.3	3.63	3.87e-16	2.51e-14
chr8	142956282	142956782	*	5.81	6.78	1.31	5.47	3.92e-16	2.53e-14
chr21	44412207	44412707	*	6.26	7.17	3.13	4.05	3.92e-16	2.53e-14
chr4	39529359	39529859	*	6.84	7.76	3.57	4.19	3.95e-16	2.54e-14
chr7	2674680	2675180	*	8.61	9.46	6.27	3.19	4.08e-16	2.62e-14
chr15	68125874	68126374	*	7.81	8.68	5.35	3.33	4.12e-16	2.64e-14
chr5	1654166	1654666	*	6.25	7.24	-0.29	7.53	4.18e-16	2.68e-14
chr22	43511744	43512244	*	5.69	6.66	0.86	5.8	4.24e-16	2.71e-14
chr7	2563258	2563758	*	7.41	8.32	4.23	4.09	4.35e-16	2.77e-14
chr19	59037147	59037647	*	6.14	7.05	3.04	4.02	4.37e-16	2.78e-14
chr12	4140711	4141211	*	8.26	9.16	5.38	3.78	4.38e-16	2.78e-14
chr7	55878221	55878721	*	5.86	6.8	2.37	4.42	4.45e-16	2.82e-14
chr16	52438666	52439166	*	5.67	6.61	1.8	4.82	4.54e-16	2.87e-14
chr18	2906657	2907157	*	7.47	8.42	3.48	4.94	5.03e-16	3.18e-14
chr10	134953370	134953870	*	5.95	6.87	2.69	4.19	5.23e-16	3.29e-14
chr1	203052557	203053057	*	7.04	7.94	4.13	3.81	5.34e-16	3.35e-14
chr22	27018336	27018836	*	5.67	6.63	1.59	5.04	5.51e-16	3.46e-14
chr1	1685045	1685545	*	6.37	7.26	3.6	3.66	5.54e-16	3.47e-14
chr17	62017500	62018000	*	5.7	6.68	0.83	5.85	5.58e-16	3.48e-14
chr19	42789410	42789910	*	5.56	6.52	1.29	5.23	5.61e-16	3.5e-14
chr1	3369881	3370381	*	6.28	7.27	-0.29	7.57	5.99e-16	3.72e-14
chr20	62597576	62598076	*	5.77	6.75	0.38	6.38	6e-16	3.72e-14
chr14	65427717	65428217	*	6.15	7.09	2.62	4.47	6.04e-16	3.74e-14
chr15	31619790	31620290	*	6.93	7.82	4.22	3.59	6.05e-16	3.74e-14
chr15	76018649	76019149	*	6.19	7.18	-0.29	7.47	6.06e-16	3.74e-14
chr19	35155169	35155669	*	6.21	7.12	3.07	4.05	6.14e-16	3.78e-14
chr4	56212455	56212955	*	8.62	9.5	5.94	3.55	6.19e-16	3.8e-14
chr20	62284170	62284670	*	5.69	6.65	1.75	4.9	6.19e-16	3.8e-14
chr17	65243871	65244371	*	7.05	7.94	4.25	3.69	6.25e-16	3.82e-14
chr7	1521150	1521650	*	6.39	7.34	2.25	5.1	6.26e-16	3.82e-14
chr2	241926158	241926658	*	5.58	6.55	0.9	5.65	6.35e-16	3.87e-14
chr10	120924775	120925275	*	7.1	7.99	4.34	3.64	6.41e-16	3.9e-14
chr2	128398447	128398947	*	6.94	7.82	4.3	3.52	6.55e-16	3.98e-14
chr16	1510678	1511178	*	6.86	7.74	4.28	3.46	6.7e-16	4.06e-14
chr19	18063611	18064111	*	5.47	6.43	1.38	5.05	6.78e-16	4.1e-14
chr1	142657805	142658305	*	7.36	8.23	4.84	3.39	6.85e-16	4.13e-14
chr12	123480897	123481397	*	7.35	8.21	4.91	3.3	7.01e-16	4.22e-14
chr12	6371215	6371715	*	6.12	7.06	2.54	4.52	7.03e-16	4.22e-14
chr22	37396683	37397183	*	5.63	6.58	1.59	5	7.11e-16	4.26e-14
chr5	177623965	177624465	*	6.47	7.37	3.61	3.76	7.16e-16	4.28e-14
chr12	42631293	42631793	*	5.93	6.87	2.2	4.67	7.27e-16	4.34e-14
chr20	61647488	61647988	*	5.65	6.61	1.32	5.29	7.53e-16	4.49e-14
chr1	27886913	27887413	*	6.89	7.79	3.92	3.87	7.69e-16	4.57e-14
chr22	20195200	20195700	*	8.27	9.15	5.53	3.62	7.81e-16	4.64e-14
chr19	1063726	1064226	*	5.49	6.46	0.84	5.63	7.83e-16	4.64e-14
chr17	29848334	29848834	*	6.72	7.64	3.47	4.17	7.87e-16	4.65e-14
chr2	241529685	241530185	*	5.86	6.85	0.08	6.77	7.92e-16	4.67e-14
chr22	39778814	39779314	*	7	7.89	4.18	3.71	7.94e-16	4.68e-14
chr9	140388805	140389305	*	5.98	6.89	2.91	3.99	8.09e-16	4.76e-14
chr22	24108957	24109457	*	5.69	6.64	1.68	4.96	8.19e-16	4.8e-14
chr7	2720307	2720807	*	5.52	6.49	0.97	5.51	8.26e-16	4.84e-14
chr20	60824729	60825229	*	5.84	6.83	0.2	6.62	8.35e-16	4.88e-14
chr1	55446534	55447034	*	7.14	8.06	4.06	4	8.53e-16	4.97e-14
chr11	64121145	64121645	*	7.9	8.83	4.51	4.32	8.68e-16	5.05e-14
chr17	73887795	73888295	*	5.94	6.9	1.59	5.31	8.69e-16	5.05e-14
chr20	61056296	61056796	*	5.69	6.63	2.21	4.42	8.83e-16	5.12e-14
chr3	52379440	52379940	*	5.58	6.55	0.62	5.93	8.99e-16	5.19e-14
chr22	20989353	20989853	*	7.3	8.18	4.68	3.5	8.99e-16	5.19e-14
chr3	69788713	69789213	*	7.81	8.66	5.48	3.19	9.01e-16	5.19e-14
chr22	40077538	40078038	*	7.76	8.61	5.43	3.18	9.06e-16	5.21e-14
chr6	43459784	43460284	*	6.16	7.07	3.14	3.93	9.19e-16	5.28e-14
chr6	160390439	160390939	*	6.42	7.35	3.01	4.34	9.62e-16	5.52e-14
chr8	22423422	22423922	*	6.21	7.2	-0.29	7.49	9.69e-16	5.54e-14
chr1	21037228	21037728	*	6.77	7.63	4.32	3.31	9.72e-16	5.55e-14
chr1	113498257	113498757	*	5.78	6.73	2.07	4.66	9.77e-16	5.57e-14
chr22	50693001	50693501	*	5.85	6.84	0.08	6.76	9.86e-16	5.61e-14
chr20	43945969	43946469	*	5.55	6.52	1.01	5.51	1e-15	5.69e-14
chr12	133050953	133051453	*	5.62	6.59	0.83	5.76	1e-15	5.69e-14
chr19	55678516	55679016	*	6.21	7.2	-0.29	7.49	1.02e-15	5.76e-14
chr20	30522961	30523461	*	5.7	6.63	2.25	4.38	1.02e-15	5.76e-14
chr22	39603901	39604401	*	6.07	6.97	3.14	3.84	1.04e-15	5.86e-14
chr1	44483780	44484280	*	5.69	6.61	2.43	4.19	1.04e-15	5.86e-14
chr3	48611947	48612447	*	5.86	6.78	2.67	4.12	1.04e-15	5.86e-14
chr17	79485830	79486330	*	7.3	8.19	4.57	3.62	1.1e-15	6.18e-14
chr20	57617321	57617821	*	6.87	7.77	4.08	3.69	1.14e-15	6.35e-14
chr9	140053360	140053860	*	6.15	7.06	3.13	3.93	1.14e-15	6.35e-14
chr1	2454093	2454593	*	5.48	6.44	1.18	5.26	1.14e-15	6.35e-14
chr11	68557751	68558251	*	5.99	6.93	2.39	4.53	1.14e-15	6.35e-14
chr1	32149569	32150069	*	8.39	9.31	5.24	4.06	1.16e-15	6.44e-14
chr3	52033012	52033512	*	5.72	6.68	1.49	5.19	1.18e-15	6.55e-14
chr9	132043788	132044288	*	5.87	6.78	2.75	4.03	1.19e-15	6.56e-14
chr22	24167623	24168123	*	7.26	8.14	4.61	3.53	1.19e-15	6.59e-14
chr12	132325506	132326006	*	6.04	6.98	2.5	4.47	1.22e-15	6.7e-14
chr19	1098040	1098540	*	5.69	6.64	1.69	4.95	1.22e-15	6.73e-14
chr1	3274344	3274844	*	6.82	7.7	4.14	3.56	1.23e-15	6.74e-14
chr10	105240437	105240937	*	7.04	7.9	4.67	3.23	1.24e-15	6.78e-14
chr22	49935320	49935820	*	5.83	6.82	0.2	6.61	1.28e-15	6.99e-14
chr16	5057054	5057554	*	5.84	6.77	2.55	4.22	1.29e-15	7.03e-14
chr1	11583283	11583783	*	6.91	7.79	4.25	3.53	1.32e-15	7.22e-14
chr12	123636320	123636820	*	6.3	7.19	3.42	3.77	1.34e-15	7.31e-14
chr19	19005691	19006191	*	8.48	9.34	6.03	3.31	1.36e-15	7.39e-14
chr2	120301954	120302454	*	7.79	8.7	4.84	3.86	1.4e-15	7.59e-14
chr19	33891782	33892282	*	5.6	6.55	1.74	4.81	1.43e-15	7.72e-14
chr11	776654	777154	*	5.65	6.63	0.57	6.06	1.44e-15	7.8e-14
chr12	96184571	96185071	*	7.33	8.18	4.97	3.21	1.45e-15	7.8e-14
chr8	142345832	142346332	*	6.3	7.24	2.66	4.58	1.46e-15	7.87e-14
chr2	233303851	233304351	*	8.71	9.6	5.95	3.64	1.49e-15	8.03e-14
chr11	119724439	119724939	*	5.63	6.57	1.82	4.75	1.54e-15	8.26e-14
chr7	158031182	158031682	*	5.62	6.6	0.38	6.23	1.56e-15	8.37e-14
chr4	1758607	1759107	*	5.8	6.72	2.56	4.16	1.58e-15	8.44e-14
chrX	48911461	48911961	*	6.36	7.32	2.16	5.16	1.6e-15	8.56e-14
chr11	113962553	113963053	*	5.66	6.62	1.68	4.93	1.62e-15	8.61e-14
chr14	65512720	65513220	*	6.09	7.08	-0.29	7.37	1.64e-15	8.7e-14
chr9	130706874	130707374	*	6.64	7.58	2.95	4.63	1.64e-15	8.72e-14
chr22	50629527	50630027	*	5.7	6.64	2.09	4.55	1.65e-15	8.72e-14
chr3	48690457	48690957	*	5.97	6.91	2.26	4.65	1.67e-15	8.82e-14
chr1	228250007	228250507	*	5.93	6.85	2.71	4.15	1.68e-15	8.86e-14
chr7	98971540	98972040	*	5.54	6.51	0.83	5.68	1.7e-15	8.97e-14
chr11	68139576	68140076	*	7.54	8.41	4.96	3.45	1.71e-15	9.01e-14
chr12	125050242	125050742	*	6.26	7.17	3.22	3.94	1.73e-15	9.1e-14
chr5	1837502	1838002	*	8.02	8.88	5.62	3.26	1.76e-15	9.24e-14
chr8	63161591	63162091	*	6.56	7.47	3.49	3.97	1.78e-15	9.31e-14
chr2	128392831	128393331	*	5.55	6.51	1.18	5.34	1.78e-15	9.31e-14
chr22	24585666	24586166	*	6.42	7.3	3.81	3.49	1.83e-15	9.53e-14
chr3	47205580	47206080	*	6.95	7.81	4.51	3.3	1.85e-15	9.64e-14
chr2	241108931	241109431	*	6.63	7.51	4.05	3.46	1.88e-15	9.75e-14
chr1	110051688	110052188	*	6.13	7.07	2.51	4.56	1.89e-15	9.82e-14
chr7	101457344	101457844	*	6.39	7.28	3.62	3.66	1.9e-15	9.85e-14
chr1	156039888	156040388	*	5.78	6.71	2.3	4.41	1.95e-15	1.01e-13
chr18	12062789	12063289	*	7.64	8.54	4.72	3.82	1.97e-15	1.02e-13
chr7	101957631	101958131	*	7.68	8.58	4.89	3.69	1.99e-15	1.03e-13
chr1	180136630	180137130	*	6.79	7.68	4.12	3.56	2.02e-15	1.04e-13
chr16	88600966	88601466	*	6.26	7.2	2.74	4.45	2.03e-15	1.04e-13
chr22	46403354	46403854	*	8.3	9.16	5.81	3.36	2.03e-15	1.04e-13
chr17	79880845	79881345	*	5.9	6.83	2.52	4.31	2.07e-15	1.06e-13
chr19	674153	674653	*	5.45	6.41	1.18	5.23	2.07e-15	1.06e-13
chr14	101696716	101697216	*	5.73	6.67	2.01	4.67	2.08e-15	1.06e-13
chr3	65793674	65794174	*	5.53	6.49	1.56	4.93	2.12e-15	1.08e-13
chr22	45014076	45014576	*	7.84	8.7	5.36	3.34	2.18e-15	1.11e-13
chr22	25678799	25679299	*	7.14	8.01	4.53	3.48	2.19e-15	1.11e-13
chr16	2337903	2338403	*	6.75	7.66	3.65	4.01	2.22e-15	1.13e-13
chr4	2061941	2062441	*	5.7	6.68	0.38	6.3	2.24e-15	1.13e-13
chr11	70390455	70390955	*	5.66	6.63	1.32	5.31	2.28e-15	1.15e-13
chr11	1716894	1717394	*	5.63	6.61	0.84	5.77	2.32e-15	1.17e-13
chr4	2073441	2073941	*	6.45	7.33	3.85	3.48	2.34e-15	1.18e-13
chr16	1827778	1828278	*	5.47	6.44	0.83	5.61	2.38e-15	1.2e-13
chr8	131028814	131029314	*	6.1	7	3.16	3.85	2.45e-15	1.23e-13
chr1	19395046	19395546	*	5.54	6.49	1.7	4.79	2.47e-15	1.24e-13
chr14	104682277	104682777	*	5.54	6.51	1.01	5.5	2.59e-15	1.3e-13
chr16	4523551	4524051	*	5.66	6.62	1.45	5.17	2.76e-15	1.38e-13
chr17	1507492	1507992	*	5.53	6.49	1.18	5.32	2.81e-15	1.4e-13
chr16	1997034	1997534	*	5.77	6.75	0.2	6.55	2.81e-15	1.4e-13
chr20	61997901	61998401	*	7.69	8.59	4.83	3.76	2.85e-15	1.42e-13
chr14	30397127	30397627	*	6.21	7.14	2.74	4.4	2.87e-15	1.42e-13
chr8	143611506	143612006	*	5.72	6.66	1.89	4.77	2.88e-15	1.43e-13
chr1	16357033	16357533	*	5.68	6.64	1.77	4.87	2.92e-15	1.44e-13
chr15	65108674	65109174	*	8.02	8.89	5.39	3.5	3.13e-15	1.55e-13
chr11	3149932	3150432	*	5.63	6.56	2.2	4.36	3.17e-15	1.56e-13
chr20	62197309	62197809	*	6.15	7.14	-0.29	7.43	3.19e-15	1.57e-13
chr5	579767	580267	*	6.25	7.15	3.32	3.83	3.32e-15	1.63e-13
chr9	131598687	131599187	*	5.52	6.47	1.68	4.79	3.34e-15	1.64e-13
chr17	78217623	78218123	*	6.55	7.44	3.84	3.6	3.42e-15	1.67e-13
chr11	63975574	63976074	*	8.11	8.97	5.62	3.36	3.45e-15	1.69e-13
chr20	60461594	60462094	*	6.06	6.97	3.04	3.93	3.67e-15	1.79e-13
chr19	11565494	11565994	*	5.81	6.77	1.66	5.11	3.71e-15	1.81e-13
chr4	8590890	8591390	*	5.78	6.73	1.86	4.87	3.8e-15	1.85e-13
chr13	114565627	114566127	*	6.13	7.12	-0.29	7.41	3.9e-15	1.89e-13
chr20	35401803	35402303	*	6.01	7	-0.29	7.29	4.03e-15	1.95e-13
chr15	45460435	45460935	*	5.74	6.68	2.04	4.64	4.08e-15	1.98e-13
chr4	2050044	2050544	*	5.7	6.64	2.17	4.47	4.16e-15	2.01e-13
chr3	75718796	75719296	*	6.11	7.07	1.98	5.09	4.24e-15	2.04e-13
chr18	10565455	10565955	*	6.99	7.9	3.95	3.95	4.24e-15	2.04e-13
chr20	44642528	44643028	*	5.81	6.79	0.08	6.71	4.25e-15	2.05e-13
chr3	51993149	51993649	*	5.46	6.43	0.62	5.81	4.61e-15	2.21e-13
chr22	37139622	37140122	*	7.83	8.69	5.45	3.24	4.75e-15	2.28e-13
chr15	91454271	91454771	*	5.75	6.69	2.13	4.56	4.89e-15	2.34e-13
chr9	137363717	137364217	*	5.96	6.95	-0.29	7.24	4.91e-15	2.34e-13
chr16	11836031	11836531	*	6.8	7.7	3.97	3.73	4.92e-15	2.35e-13
chr5	53813697	53814197	*	6.07	7.03	1.69	5.34	5e-15	2.38e-13
chr11	60692127	60692627	*	7.81	8.68	5.29	3.39	5.04e-15	2.4e-13
chr11	47374297	47374797	*	5.97	6.96	-0.29	7.25	5.05e-15	2.4e-13
chr3	126984151	126984651	*	6.08	6.98	3.16	3.83	5.17e-15	2.45e-13
chr15	91434746	91435246	*	5.46	6.43	1.02	5.4	5.19e-15	2.46e-13
chr19	1028709	1029209	*	5.45	6.41	1.53	4.88	5.24e-15	2.48e-13
chr2	10572464	10572964	*	7.12	8.01	4.4	3.61	5.29e-15	2.5e-13
chr17	80183343	80183843	*	7.44	8.31	4.92	3.39	5.3e-15	2.5e-13
chr10	1618145	1618645	*	5.64	6.59	1.49	5.1	5.34e-15	2.51e-13
chr10	73625593	73626093	*	7.07	8.01	3.6	4.4	5.34e-15	2.51e-13
chr20	31211495	31211995	*	6.46	7.39	2.99	4.4	5.35e-15	2.51e-13
chrX	20008483	20008983	*	6.49	7.4	3.43	3.97	5.69e-15	2.66e-13
chr17	79951201	79951701	*	6.65	7.57	3.48	4.09	5.7e-15	2.66e-13
chr8	145049200	145049700	*	5.96	6.95	-0.29	7.24	5.8e-15	2.71e-13
chr16	85490688	85491188	*	6.28	7.19	3.16	4.03	5.89e-15	2.75e-13
chrX	47041186	47041686	*	5.63	6.59	1.18	5.42	5.91e-15	2.75e-13
chr8	69244325	69244825	*	5.47	6.44	0.86	5.58	5.96e-15	2.77e-13
chr1	44069873	44070373	*	7.84	8.73	5.06	3.68	6.04e-15	2.8e-13
chr11	67396940	67397440	*	6.78	7.68	3.96	3.72	6.05e-15	2.8e-13
chr8	144066913	144067413	*	6.72	7.6	4.04	3.56	6.05e-15	2.8e-13
chr16	84988995	84989495	*	6.89	7.76	4.38	3.37	6.09e-15	2.81e-13
chr17	37773205	37773705	*	5.77	6.7	2.35	4.36	6.1e-15	2.81e-13
chr19	29218154	29218654	*	6.47	7.4	2.92	4.48	6.35e-15	2.92e-13
chr17	47999553	48000053	*	5.94	6.89	2.16	4.73	6.37e-15	2.93e-13
chr5	180621433	180621933	*	5.44	6.41	0.63	5.78	6.48e-15	2.97e-13
chr5	1163936	1164436	*	5.96	6.95	-0.29	7.24	6.58e-15	3.01e-13
chr11	64677458	64677958	*	5.97	6.96	-0.29	7.25	6.58e-15	3.01e-13
chr9	139748065	139748565	*	6.47	7.35	3.79	3.57	6.64e-15	3.03e-13
chr19	10544023	10544523	*	5.53	6.51	0.38	6.13	6.65e-15	3.03e-13
chr19	36380332	36380832	*	6.22	7.09	3.59	3.5	6.71e-15	3.06e-13
chr10	134269833	134270333	*	5.47	6.42	1.55	4.87	6.76e-15	3.08e-13
chr1	1977788	1978288	*	5.66	6.6	2.1	4.49	6.83e-15	3.1e-13
chr9	95876505	95877005	*	5.96	6.86	2.93	3.93	6.84e-15	3.1e-13
chr17	48921501	48922001	*	6.25	7.13	3.6	3.53	6.95e-15	3.15e-13
chr1	62660569	62661069	*	5.84	6.75	2.79	3.96	6.98e-15	3.15e-13
chr11	67158961	67159461	*	6.25	7.15	3.33	3.82	7.12e-15	3.21e-13
chr22	38329164	38329664	*	5.92	6.91	-0.29	7.2	7.16e-15	3.23e-13
chr2	2649294	2649794	*	6.9	7.77	4.27	3.51	7.34e-15	3.3e-13
chr1	3278290	3278790	*	6.36	7.27	3.15	4.12	7.45e-15	3.35e-13
chr3	184287611	184288111	*	5.63	6.62	0.2	6.42	7.62e-15	3.42e-13
chr8	143654266	143654766	*	7.39	8.28	4.66	3.61	7.85e-15	3.52e-13
chr2	1480648	1481148	*	5.49	6.45	1.1	5.35	7.96e-15	3.56e-13
chr22	37852247	37852747	*	5.63	6.56	2.12	4.44	7.96e-15	3.56e-13
chr12	124845848	124846348	*	5.83	6.75	2.46	4.29	8.26e-15	3.69e-13
chr8	25315262	25315762	*	6.18	7.08	3.25	3.84	8.31e-15	3.7e-13
chr17	73556013	73556513	*	7.08	8.01	3.79	4.22	8.36e-15	3.72e-13
chr20	44455638	44456138	*	6.19	7.1	3.1	4	8.54e-15	3.79e-13
chr16	89119516	89120016	*	5.53	6.48	1.57	4.91	8.55e-15	3.79e-13
chr1	2852332	2852832	*	5.45	6.4	1.58	4.82	8.64e-15	3.83e-13
chr1	2158300	2158800	*	5.52	6.47	1.69	4.78	8.77e-15	3.87e-13
chr22	45283818	45284318	*	6.05	6.95	3.18	3.77	8.77e-15	3.87e-13
chr1	204446299	204446799	*	5.7	6.61	2.62	3.99	8.79e-15	3.88e-13
chr8	101322357	101322857	*	6.29	7.22	2.83	4.38	9.06e-15	3.99e-13
chr8	142365248	142365748	*	6.74	7.68	3.22	4.46	9.13e-15	4.01e-13
chr6	31239488	31239988	*	6.33	7.26	2.82	4.44	9.23e-15	4.05e-13
chr22	50726156	50726656	*	5.9	6.89	-0.29	7.18	9.49e-15	4.16e-13
chr1	19214948	19215448	*	6.37	7.23	3.92	3.31	9.6e-15	4.2e-13
chr19	58175630	58176130	*	6.25	7.14	3.49	3.66	9.73e-15	4.25e-13
chr11	69635105	69635605	*	6.63	7.57	3.08	4.49	9.82e-15	4.29e-13
chr1	205274050	205274550	*	5.48	6.46	0.38	6.08	9.87e-15	4.3e-13
chr1	44481871	44482371	*	5.53	6.5	1.18	5.32	9.89e-15	4.3e-13
chr19	10532467	10532967	*	6.23	7.15	3	4.16	1e-14	4.36e-13
chr5	180073870	180074370	*	6.66	7.51	4.33	3.18	1e-14	4.36e-13
chr17	1365399	1365899	*	5.42	6.36	1.75	4.61	1.04e-14	4.49e-13
chr8	143832174	143832674	*	6.49	7.37	3.81	3.56	1.04e-14	4.49e-13
chr17	48752886	48753386	*	5.41	6.36	1.73	4.63	1.05e-14	4.54e-13
chr1	22889898	22890398	*	5.79	6.77	0.38	6.39	1.05e-14	4.54e-13
chr19	48113134	48113634	*	6.03	6.94	2.82	4.12	1.06e-14	4.54e-13
chr12	668713	669213	*	5.71	6.67	1.58	5.09	1.06e-14	4.54e-13
chr20	3654120	3654620	*	5.74	6.7	1.58	5.13	1.1e-14	4.71e-13
chr2	10573857	10574357	*	7.33	8.2	4.79	3.41	1.1e-14	4.72e-13
chr11	36531106	36531606	*	6.7	7.59	3.95	3.64	1.12e-14	4.8e-13
chr1	11786480	11786980	*	5.92	6.91	-0.29	7.2	1.15e-14	4.9e-13
chr7	2209028	2209528	*	6.86	7.71	4.48	3.23	1.18e-14	5.04e-13
chr7	5459841	5460341	*	5.37	6.33	1.24	5.09	1.18e-14	5.05e-13
chr16	69599971	69600934	*	5.92	6.85	2.5	4.35	1.19e-14	5.05e-13
chr1	43774919	43775419	*	6.47	7.41	3	4.41	1.22e-14	5.18e-13
chr9	139392877	139393377	*	5.33	6.29	0.84	5.46	1.22e-14	5.19e-13
chr3	46506509	46507009	*	6.09	7.01	2.92	4.08	1.22e-14	5.19e-13
chr18	77825707	77826207	*	6.73	7.63	3.94	3.68	1.23e-14	5.22e-13
chr17	73545393	73545893	*	6.86	7.72	4.37	3.35	1.25e-14	5.28e-13
chr11	120856490	120856990	*	7	7.9	4.07	3.82	1.25e-14	5.3e-13
chr15	74626727	74627227	*	5.63	6.61	0.63	5.98	1.28e-14	5.41e-13
chr13	114214568	114215068	*	5.54	6.5	1.45	5.05	1.31e-14	5.52e-13
chr7	100100664	100101164	*	6.1	7	3.22	3.77	1.35e-14	5.69e-13
chr22	29722723	29723223	*	5.36	6.32	0.9	5.42	1.36e-14	5.73e-13
chr20	49330792	49331292	*	5.43	6.39	1.33	5.06	1.37e-14	5.73e-13
chr11	68777785	68778285	*	5.83	6.76	2.36	4.4	1.38e-14	5.78e-13
chr17	79151879	79152379	*	7.94	8.82	5.31	3.51	1.41e-14	5.88e-13
chr3	52551872	52552372	*	7.03	7.97	3.43	4.54	1.41e-14	5.91e-13
chr11	67777899	67778399	*	7.06	7.91	4.66	3.26	1.43e-14	5.97e-13
chr17	41753918	41754418	*	5.89	6.81	2.7	4.11	1.46e-14	6.06e-13
chr9	136358977	136359477	*	7.5	8.4	4.53	3.88	1.46e-14	6.07e-13
chr22	22336271	22336771	*	5.62	6.6	0.2	6.4	1.46e-14	6.07e-13
chr1	206680923	206681423	*	6.07	7.01	2.48	4.52	1.46e-14	6.07e-13
chr8	144342585	144343085	*	8.79	9.7	5.78	3.91	1.47e-14	6.07e-13
chr2	10378556	10379056	*	5.82	6.74	2.66	4.08	1.52e-14	6.27e-13
chr7	2538848	2539348	*	5.84	6.83	-0.29	7.12	1.55e-14	6.38e-13
chr22	43119165	43119665	*	5.52	6.44	2.34	4.1	1.55e-14	6.38e-13
chr15	68122182	68122682	*	6.05	6.98	2.83	4.15	1.58e-14	6.49e-13
chr22	45015944	45016444	*	6.41	7.27	4	3.27	1.58e-14	6.5e-13
chr22	35695244	35695744	*	7.04	7.91	4.53	3.37	1.58e-14	6.5e-13
chr1	17278426	17278926	*	7.06	8	3.47	4.53	1.59e-14	6.53e-13
chr12	125478356	125478856	*	8.74	9.62	6.11	3.51	1.6e-14	6.55e-13
chr3	124498716	124499216	*	6.56	7.44	3.94	3.5	1.63e-14	6.66e-13
chr9	140127882	140128382	*	5.57	6.55	0.62	5.93	1.65e-14	6.76e-13
chr5	1654938	1655438	*	5.49	6.45	1.46	4.99	1.67e-14	6.81e-13
chr7	1046394	1046894	*	6.23	7.09	3.73	3.36	1.67e-14	6.81e-13
chr2	131512490	131512990	*	5.42	6.38	0.86	5.52	1.67e-14	6.82e-13
chr12	12260607	12261107	*	6.23	7.15	3.02	4.14	1.69e-14	6.89e-13
chr8	144463155	144463655	*	6.35	7.28	3.14	4.13	1.71e-14	6.94e-13
chr20	61013092	61013592	*	5.43	6.4	0.38	6.03	1.74e-14	7.05e-13
chr3	40518619	40519119	*	5.45	6.41	1.1	5.31	1.75e-14	7.08e-13
chr22	50193298	50193798	*	5.86	6.76	2.91	3.85	1.78e-14	7.19e-13
chr22	28175673	28176173	*	7.89	8.71	5.74	2.98	1.81e-14	7.33e-13
chr16	1832188	1832688	*	5.82	6.81	-0.29	7.1	1.84e-14	7.43e-13
chr8	144297062	144297562	*	6.48	7.41	2.91	4.51	1.85e-14	7.43e-13
chr8	142361117	142361617	*	5.67	6.62	1.98	4.64	1.86e-14	7.49e-13
chr14	74485517	74486017	*	5.86	6.82	1.89	4.93	1.89e-14	7.58e-13
chr9	136836198	136836698	*	5.37	6.34	0.63	5.71	1.9e-14	7.63e-13
chr12	122278207	122278707	*	5.28	6.24	0.91	5.34	1.91e-14	7.64e-13
chr14	105395253	105395753	*	6.08	6.98	3.23	3.74	1.91e-14	7.64e-13
chr22	45825734	45826234	*	7.68	8.59	4.58	4.01	1.92e-14	7.68e-13
chr17	30589800	30590300	*	5.88	6.81	2.44	4.37	1.94e-14	7.74e-13
chr10	133450859	133451359	*	5.95	6.87	2.64	4.23	1.97e-14	7.83e-13
chr20	31270439	31270939	*	5.79	6.73	2.23	4.51	1.99e-14	7.92e-13
chr11	61244858	61245358	*	5.41	6.37	1.18	5.19	2e-14	7.95e-13
chr15	90371577	90372077	*	6.53	7.38	4.18	3.2	2.02e-14	8e-13
chr16	623594	624094	*	5.94	6.85	2.98	3.87	2.02e-14	8.01e-13
chr13	113969211	113969711	*	5.64	6.6	1.32	5.28	2.03e-14	8.03e-13
chr16	70739991	70740491	*	6.93	7.8	4.42	3.38	2.03e-14	8.04e-13
chr7	45721204	45721704	*	5.85	6.84	-0.29	7.13	2.04e-14	8.07e-13
chr22	44778630	44779130	*	7.76	8.62	5.29	3.33	2.05e-14	8.08e-13
chr16	1792165	1792665	*	6.13	7.05	2.98	4.07	2.07e-14	8.14e-13
chr9	130511792	130512292	*	7.01	7.85	4.71	3.14	2.1e-14	8.26e-13
chr16	30101506	30102006	*	6.57	7.47	3.67	3.8	2.1e-14	8.26e-13
chr3	48613923	48614423	*	5.98	6.91	2.56	4.35	2.11e-14	8.28e-13
chr1	3199973	3200473	*	5.28	6.23	1.43	4.8	2.14e-14	8.39e-13
chr3	13069813	13070313	*	7.03	7.87	4.8	3.07	2.16e-14	8.45e-13
chr17	60704879	60705379	*	6.29	7.22	2.78	4.45	2.17e-14	8.49e-13
chr16	56904807	56905307	*	5.47	6.43	1.18	5.25	2.2e-14	8.58e-13
chr12	132060863	132061363	*	6.89	7.78	4.1	3.68	2.23e-14	8.7e-13
chr19	18894695	18895195	*	5.38	6.35	0.84	5.51	2.27e-14	8.83e-13
chr20	33863699	33864199	*	6.76	7.62	4.36	3.25	2.27e-14	8.83e-13
chr20	44001659	44002159	*	5.81	6.8	-0.29	7.1	2.28e-14	8.83e-13
chr22	38302360	38302860	*	6.78	7.68	3.85	3.83	2.32e-14	8.99e-13
chr18	11520876	11521376	*	7.48	8.34	5.04	3.3	2.33e-14	9.04e-13
chr20	31187796	31188296	*	5.46	6.4	1.81	4.59	2.38e-14	9.2e-13
chr19	17988420	17988920	*	5.44	6.4	1.32	5.08	2.41e-14	9.3e-13
chr21	45558520	45559020	*	5.82	6.81	-0.29	7.1	2.42e-14	9.34e-13
chr17	16784142	16784642	*	5.55	6.5	1.63	4.87	2.45e-14	9.44e-13
chr16	1728186	1728686	*	5.39	6.35	1.2	5.14	2.49e-14	9.58e-13
chr15	78181709	78182209	*	6.12	7.02	3.1	3.92	2.52e-14	9.68e-13
chr1	11765331	11765831	*	5.44	6.4	1.18	5.23	2.52e-14	9.68e-13
chr1	3396155	3396655	*	7.14	7.99	4.8	3.19	2.55e-14	9.79e-13
chr1	202021889	202022389	*	5.47	6.42	1.64	4.78	2.56e-14	9.79e-13
chr10	134681351	134681851	*	5.55	6.48	2.05	4.44	2.56e-14	9.79e-13
chr16	2258757	2259257	*	7.32	8.18	4.83	3.35	2.57e-14	9.82e-13
chr11	73365855	73366355	*	7.43	8.29	5.01	3.28	2.6e-14	9.9e-13
chr20	36030992	36031492	*	6.26	7.14	3.61	3.54	2.66e-14	1.01e-12
chr2	112464172	112464672	*	6.97	7.83	4.53	3.3	2.67e-14	1.02e-12
chr8	143585219	143585719	*	5.93	6.85	2.56	4.29	2.73e-14	1.04e-12
chr1	228547881	228548381	*	5.46	6.39	1.91	4.49	2.75e-14	1.04e-12
chr17	29876208	29876708	*	8.02	8.88	5.55	3.33	2.76e-14	1.04e-12
chr5	684946	685446	*	5.55	6.48	2.07	4.41	2.77e-14	1.05e-12
chr2	233232041	233232541	*	6.76	7.63	4.17	3.46	2.77e-14	1.05e-12
chr6	169391965	169392465	*	5.44	6.39	1.69	4.69	2.78e-14	1.05e-12
chr16	67574575	67575075	*	6.38	7.25	3.83	3.41	2.78e-14	1.05e-12
chr4	3486576	3487076	*	6.44	7.32	3.72	3.6	2.81e-14	1.06e-12
chr19	46381220	46381720	*	5.7	6.66	1.69	4.97	2.82e-14	1.06e-12
chr1	6656716	6657216	*	5.53	6.48	1.69	4.79	2.83e-14	1.06e-12
chr22	46339128	46339628	*	5.88	6.87	-0.29	7.16	2.83e-14	1.06e-12
chr7	55220639	55221139	*	5.32	6.28	1.33	4.95	2.85e-14	1.07e-12
chr2	1512967	1513467	*	8.04	8.9	5.67	3.23	2.86e-14	1.07e-12
chr20	61086200	61086700	*	6.99	7.86	4.48	3.38	2.91e-14	1.09e-12
chr14	75408082	75408582	*	5.75	6.66	2.59	4.08	2.95e-14	1.1e-12
chr2	10209975	10210475	*	5.32	6.27	1.32	4.94	2.97e-14	1.11e-12
chr19	4063100	4063600	*	5.79	6.72	2.46	4.26	2.98e-14	1.11e-12
chr16	31340915	31341415	*	5.42	6.37	1.64	4.73	3.04e-14	1.13e-12
chr21	46928677	46929177	*	6.7	7.6	3.83	3.77	3.06e-14	1.14e-12
chr22	19697923	19698423	*	7.58	8.46	4.94	3.52	3.1e-14	1.15e-12
chr20	46611619	46612119	*	5.76	6.7	2.19	4.51	3.11e-14	1.15e-12
chr17	18010217	18010717	*	6.12	7.04	2.9	4.14	3.11e-14	1.15e-12
chr1	19060657	19061157	*	5.87	6.8	2.52	4.28	3.12e-14	1.15e-12
chr15	27786728	27787228	*	5.85	6.78	2.42	4.36	3.16e-14	1.17e-12
chr14	104891532	104892032	*	6.74	7.62	4.1	3.52	3.18e-14	1.17e-12
chr17	65242014	65242514	*	6.37	7.27	3.55	3.72	3.19e-14	1.17e-12
chr16	50660575	50661075	*	6.56	7.44	3.98	3.45	3.22e-14	1.19e-12
chr5	131725523	131726023	*	5.88	6.79	2.94	3.85	3.34e-14	1.23e-12
chr4	1765216	1765716	*	7.06	7.95	4.4	3.55	3.35e-14	1.23e-12
chr22	35696230	35696730	*	6.38	7.3	3.09	4.21	3.37e-14	1.23e-12
chr3	38040049	38040549	*	6.15	7.07	3	4.07	3.39e-14	1.24e-12
chr20	30457787	30458287	*	5.9	6.79	3.15	3.64	3.4e-14	1.24e-12
chr3	48599739	48600239	*	6.55	7.43	3.89	3.54	3.41e-14	1.25e-12
chr20	43340284	43340784	*	5.72	6.67	1.79	4.88	3.45e-14	1.26e-12
chr22	20990493	20990993	*	6.43	7.31	3.79	3.52	3.46e-14	1.26e-12
chr19	49971901	49972401	*	5.52	6.51	0.08	6.43	3.49e-14	1.27e-12
chr17	73732615	73733115	*	7.37	8.26	4.63	3.63	3.52e-14	1.28e-12
chr11	1224568	1225068	*	5.59	6.53	1.98	4.55	3.53e-14	1.28e-12
chr11	76883061	76883561	*	5.95	6.91	1.98	4.93	3.58e-14	1.3e-12
chr11	67209908	67210408	*	5.97	6.85	3.33	3.52	3.62e-14	1.31e-12
chr20	61449971	61450471	*	5.41	6.37	1.31	5.06	3.63e-14	1.31e-12
chr20	33290756	33291256	*	6.37	7.23	3.93	3.3	3.66e-14	1.32e-12
chr12	96183287	96183787	*	6.17	7.04	3.61	3.42	3.67e-14	1.32e-12
chr18	77153626	77154126	*	7.56	8.42	5.15	3.27	3.68e-14	1.33e-12
chr8	144945147	144945647	*	5.37	6.34	0.83	5.51	3.69e-14	1.33e-12
chr22	39165166	39165666	*	8	8.87	5.43	3.44	3.7e-14	1.33e-12
chr4	1757219	1757719	*	5.38	6.35	0.83	5.52	3.71e-14	1.33e-12
chr19	5056586	5057086	*	5.69	6.64	1.9	4.74	3.72e-14	1.33e-12
chr4	7257419	7257919	*	5.55	6.5	1.58	4.92	3.73e-14	1.34e-12
chr16	715964	716464	*	6.05	6.99	2.45	4.54	3.78e-14	1.35e-12
chr16	890060	890560	*	6.39	7.25	3.96	3.28	3.8e-14	1.36e-12
chr7	63250281	63250781	*	5.39	6.34	1.5	4.84	3.88e-14	1.38e-12
chr22	49484590	49485090	*	5.89	6.88	-0.29	7.17	3.91e-14	1.39e-12
chr22	45016661	45017161	*	5.67	6.58	2.61	3.97	3.98e-14	1.42e-12
chr6	143857984	143858484	*	6.35	7.25	3.52	3.73	4.05e-14	1.44e-12
chr17	18901191	18901691	*	6.13	7.04	3.06	3.99	4.12e-14	1.46e-12
chr22	46392124	46392624	*	8.01	8.87	5.62	3.25	4.25e-14	1.51e-12
chr16	27324841	27325341	*	7.31	8.14	5.1	3.04	4.26e-14	1.51e-12
chr7	99705704	99706204	*	5.52	6.47	1.62	4.85	4.33e-14	1.53e-12
chr1	2936128	2936628	*	5.44	6.36	2.14	4.22	4.38e-14	1.55e-12
chr20	42202592	42203092	*	5.65	6.57	2.48	4.09	4.4e-14	1.55e-12
chr22	41813915	41814415	*	5.97	6.86	3.15	3.71	4.46e-14	1.57e-12
chr20	62685445	62685945	*	5.75	6.74	-0.29	7.03	4.51e-14	1.59e-12
chr9	139607346	139607846	*	5.25	6.22	0.79	5.43	4.53e-14	1.6e-12
chr11	119218259	119218759	*	6.07	6.96	3.4	3.56	4.54e-14	1.6e-12
chr13	114515510	114516010	*	5.85	6.76	2.82	3.94	4.56e-14	1.6e-12
chr14	105815259	105815759	*	7.48	8.34	5.04	3.3	4.59e-14	1.61e-12
chr1	55045732	55046232	*	5.37	6.35	0.38	5.97	4.59e-14	1.61e-12
chr16	88601489	88602483	*	6.11	7.06	2.43	4.63	4.62e-14	1.62e-12
chr3	50164596	50165096	*	5.86	6.79	2.53	4.25	4.72e-14	1.65e-12
chr9	130707866	130708366	*	6.28	7.14	3.83	3.31	4.76e-14	1.66e-12
chr16	88575074	88575574	*	5.24	6.2	0.97	5.23	4.76e-14	1.66e-12
chr11	46413502	46414002	*	5.43	6.38	1.52	4.86	4.86e-14	1.69e-12
chr4	1358308	1358808	*	5.85	6.78	2.51	4.27	4.87e-14	1.69e-12
chr1	150527018	150527518	*	7.34	8.24	4.41	3.83	4.9e-14	1.7e-12
chr1	201475901	201476401	*	6.8	7.74	3.26	4.48	4.91e-14	1.7e-12
chr9	136856943	136857443	*	5.67	6.58	2.67	3.9	4.95e-14	1.72e-12
chr2	241402832	241403332	*	5.67	6.59	2.46	4.13	4.96e-14	1.72e-12
chr17	79457613	79458113	*	5.73	6.66	2.5	4.15	5.03e-14	1.74e-12
chr12	115105114	115105614	*	6.03	6.91	3.38	3.54	5.07e-14	1.75e-12
chr3	58476784	58477284	*	5.64	6.53	2.79	3.74	5.12e-14	1.77e-12
chr17	4502596	4503096	*	7.11	7.93	4.99	2.94	5.13e-14	1.77e-12
chr18	11983619	11984119	*	5.94	6.81	3.3	3.51	5.27e-14	1.82e-12
chr14	103009584	103010084	*	6.64	7.52	4.01	3.51	5.3e-14	1.82e-12
chr22	39658124	39658624	*	6.73	7.6	4.16	3.44	5.35e-14	1.84e-12
chr2	106139138	106139638	*	6.88	7.71	4.68	3.02	5.35e-14	1.84e-12
chr9	138116197	138116697	*	5.25	6.21	0.71	5.51	5.36e-14	1.84e-12
chr6	33645297	33645797	*	8.67	9.56	5.98	3.58	5.37e-14	1.84e-12
chr16	1464777	1465277	*	6.62	7.5	4.08	3.41	5.47e-14	1.87e-12
chr20	62473119	62473619	*	5.54	6.49	1.58	4.92	5.68e-14	1.94e-12
chr2	233195601	233196101	*	6.6	7.48	3.99	3.48	5.74e-14	1.96e-12
chr14	104166157	104166657	*	5.84	6.73	3.08	3.64	5.74e-14	1.96e-12
chr2	233321515	233322015	*	6.53	7.47	2.99	4.48	5.77e-14	1.96e-12
chr14	104899601	104900101	*	5.31	6.28	0.62	5.66	5.93e-14	2.01e-12
chr15	63101424	63101924	*	6.13	7.07	2.5	4.57	5.95e-14	2.02e-12
chr17	48190798	48191298	*	7.83	8.68	5.51	3.17	5.99e-14	2.03e-12
chr22	20003510	20004010	*	6.57	7.42	4.16	3.26	6.01e-14	2.04e-12
chr1	180213842	180214342	*	6.67	7.53	4.27	3.26	6.03e-14	2.04e-12
chr5	79703793	79704293	*	5.69	6.67	-0.29	6.97	6.11e-14	2.06e-12
chr18	12252968	12253468	*	5.41	6.39	0.08	6.31	6.21e-14	2.1e-12
chr16	89697489	89697989	*	5.31	6.28	1.01	5.26	6.28e-14	2.12e-12
chr11	747397	747897	*	5.62	6.54	2.47	4.07	6.3e-14	2.12e-12
chr7	101245761	101246261	*	5.93	6.84	2.9	3.94	6.44e-14	2.17e-12
chr20	58141614	58142114	*	5.24	6.2	1.18	5.02	6.48e-14	2.18e-12
chr19	46995151	46995651	*	7.46	8.31	5.09	3.23	6.48e-14	2.18e-12
chr17	19618425	19618925	*	7.82	8.67	5.45	3.22	6.49e-14	2.18e-12
chr22	38699134	38699634	*	8.12	8.99	5.51	3.49	6.64e-14	2.22e-12
chr11	64023631	64024131	*	6	6.89	3.17	3.72	6.64e-14	2.22e-12
chr6	168444331	168444831	*	5.51	6.45	1.86	4.59	6.72e-14	2.25e-12
chr1	1443699	1444199	*	5.7	6.69	-0.29	6.98	6.79e-14	2.27e-12
chr1	6319507	6320007	*	5.7	6.63	2.18	4.45	6.81e-14	2.27e-12
chr9	139746314	139746814	*	6.64	7.49	4.33	3.16	6.82e-14	2.27e-12
chr16	3713900	3714400	*	5.42	6.34	2.27	4.07	6.83e-14	2.27e-12
chr12	3409833	3410333	*	6.3	7.16	3.89	3.27	7e-14	2.33e-12
chr17	79761802	79762302	*	6.41	7.28	3.82	3.46	7.13e-14	2.37e-12
chr19	11511436	11511936	*	6.15	7.02	3.55	3.47	7.22e-14	2.39e-12
chr7	44301796	44302296	*	6.1	6.98	3.47	3.5	7.34e-14	2.43e-12
chr15	74658109	74658609	*	6.26	7.14	3.61	3.53	7.42e-14	2.46e-12
chr8	144294577	144295077	*	5.9	6.85	1.99	4.86	7.47e-14	2.47e-12
chr7	1685099	1685599	*	5.76	6.75	-0.29	7.04	7.55e-14	2.49e-12
chr11	64878129	64878629	*	7.53	8.42	4.8	3.62	7.67e-14	2.53e-12
chr5	302552	303052	*	7.4	8.25	5	3.25	7.68e-14	2.53e-12
chr16	2083090	2083590	*	6.36	7.29	2.96	4.34	7.75e-14	2.55e-12
chr20	60723254	60723754	*	5.24	6.18	1.71	4.47	7.75e-14	2.55e-12
chr1	19638832	19639332	*	6.59	7.52	3.12	4.4	7.98e-14	2.62e-12
chr3	52280185	52280685	*	6.38	7.28	3.49	3.79	8.09e-14	2.65e-12
chr3	48715958	48716458	*	5.49	6.43	1.96	4.47	8.09e-14	2.65e-12
chrX	153698515	153699015	*	5.93	6.85	2.59	4.27	8.11e-14	2.66e-12
chr5	178420803	178421303	*	5.75	6.74	-0.29	7.03	8.13e-14	2.66e-12
chr19	17735157	17735657	*	6.35	7.23	3.7	3.54	8.17e-14	2.67e-12
chr8	28292282	28292782	*	6.16	7.08	2.97	4.12	8.22e-14	2.68e-12
chr11	65585256	65585756	*	7	7.88	4.45	3.42	8.22e-14	2.68e-12
chr17	76968951	76969451	*	6.71	7.55	4.47	3.08	8.26e-14	2.69e-12
chr20	31269663	31270163	*	7.02	7.94	3.78	4.15	8.38e-14	2.73e-12
chr6	3355580	3356080	*	5.58	6.49	2.48	4.01	8.44e-14	2.74e-12
chr20	35984330	35984830	*	7.38	8.3	4.12	4.19	8.48e-14	2.75e-12
chr22	50748618	50749118	*	5.8	6.71	2.62	4.1	8.53e-14	2.77e-12
chr19	55697700	55698200	*	5.39	6.34	1.68	4.65	8.55e-14	2.77e-12
chr16	84816121	84816621	*	5.27	6.23	0.86	5.37	8.6e-14	2.78e-12
chr15	28263344	28263844	*	5.25	6.18	1.85	4.33	8.63e-14	2.79e-12
chr4	8616668	8617168	*	6.54	7.41	3.96	3.45	8.78e-14	2.84e-12
chr17	47997457	47997957	*	6.44	7.34	3.51	3.83	8.85e-14	2.86e-12
chr9	139027098	139027598	*	5.65	6.56	2.58	3.98	8.97e-14	2.89e-12
chr16	85176952	85177452	*	5.31	6.28	0.48	5.8	8.97e-14	2.89e-12
chr8	143098615	143099115	*	6.76	7.63	4.28	3.35	9.06e-14	2.91e-12
chr2	131525514	131526014	*	5.79	6.7	2.69	4.01	9.14e-14	2.93e-12
chr1	16515857	16516357	*	5.27	6.23	1.1	5.13	9.14e-14	2.93e-12
chr19	15564597	15565097	*	5.71	6.7	-0.29	6.99	9.17e-14	2.94e-12
chr22	20144007	20144507	*	5.76	6.69	2.32	4.37	9.25e-14	2.96e-12
chr2	242695217	242695717	*	7.39	8.26	4.89	3.37	9.27e-14	2.96e-12
chr19	49580593	49581093	*	5.63	6.55	2.28	4.27	9.47e-14	3.02e-12
chr7	158209978	158210478	*	5.19	6.15	0.9	5.25	9.59e-14	3.06e-12
chr15	76603179	76603679	*	5.61	6.56	1.69	4.88	9.74e-14	3.11e-12
chr8	142441555	142442055	*	6.22	7.14	3.07	4.07	9.86e-14	3.14e-12
chr16	2258000	2258500	*	6.11	7.02	3.09	3.93	1e-13	3.18e-12
chr11	60609878	60610378	*	5.44	6.42	0.08	6.33	1e-13	3.18e-12
chr21	32930253	32930753	*	6.16	7.04	3.62	3.41	1e-13	3.18e-12
chr2	47256820	47257320	*	5.29	6.25	1.34	4.9	1.01e-13	3.19e-12
chr15	91519285	91519785	*	5.15	6.1	1.14	4.96	1.01e-13	3.2e-12
chr22	50349262	50349762	*	8.14	9.01	5.55	3.46	1.01e-13	3.2e-12
chr11	1263332	1263832	*	6.07	6.94	3.49	3.45	1.03e-13	3.25e-12
chr5	178737566	178738066	*	6.78	7.65	4.16	3.49	1.03e-13	3.25e-12
chr9	137629333	137629833	*	5.66	6.65	-0.29	6.94	1.04e-13	3.27e-12
chr1	27030519	27031019	*	5.44	6.38	1.95	4.43	1.04e-13	3.27e-12
chr17	73554422	73554922	*	5.32	6.26	1.52	4.74	1.05e-13	3.3e-12
chr11	67804009	67804509	*	6.28	7.17	3.49	3.67	1.05e-13	3.3e-12
chr7	1490072	1490572	*	8.5	9.37	6.02	3.35	1.05e-13	3.3e-12
chr20	31869827	31870327	*	6.56	7.41	4.25	3.16	1.07e-13	3.35e-12
chr7	98898932	98899432	*	6.37	7.26	3.65	3.61	1.07e-13	3.36e-12
chr10	43428345	43428845	*	5.43	6.41	0.08	6.33	1.07e-13	3.36e-12
chr10	134273435	134273935	*	5.4	6.35	1.45	4.9	1.07e-13	3.36e-12
chr20	60899427	60899927	*	5.51	6.46	1.58	4.89	1.08e-13	3.37e-12
chr20	61866629	61867129	*	7.35	8.2	4.99	3.21	1.09e-13	3.4e-12
chr20	61403613	61404113	*	7.17	8.04	4.67	3.36	1.09e-13	3.41e-12
chr3	23852069	23852569	*	5.43	6.37	1.9	4.47	1.1e-13	3.42e-12
chr4	2074050	2074550	*	6.06	7.02	2.14	4.87	1.11e-13	3.46e-12
chr10	124395840	124396340	*	5.6	6.52	2.27	4.25	1.12e-13	3.49e-12
chr19	1396256	1396756	*	5.65	6.64	-0.29	6.93	1.14e-13	3.53e-12
chr5	149592805	149593305	*	5.69	6.64	1.79	4.85	1.16e-13	3.6e-12
chr3	13192824	13193324	*	5.81	6.74	2.48	4.26	1.17e-13	3.64e-12
chr22	50017775	50018275	*	6.71	7.58	4.09	3.49	1.22e-13	3.78e-12
chr17	19312389	19312889	*	6.36	7.21	4.02	3.19	1.24e-13	3.82e-12
chr10	134858180	134858680	*	6.56	7.41	4.25	3.16	1.25e-13	3.87e-12
chr1	160231658	160232158	*	5.73	6.64	2.71	3.92	1.26e-13	3.87e-12
chr11	47414919	47415419	*	6.39	7.3	3.31	3.99	1.27e-13	3.92e-12
chr8	142195027	142195527	*	5.64	6.63	-0.29	6.92	1.29e-13	3.99e-12
chr17	38170093	38170593	*	6.74	7.62	4	3.62	1.3e-13	4.01e-12
chr19	49640958	49641458	*	5.34	6.32	0.2	6.12	1.31e-13	4.03e-12
chr7	98165121	98165621	*	5.45	6.36	2.43	3.93	1.31e-13	4.04e-12
chr15	80696293	80696793	*	5.71	6.6	2.83	3.78	1.32e-13	4.05e-12
chr7	1539765	1540265	*	7.21	8.05	4.92	3.13	1.34e-13	4.09e-12
chr15	85490045	85490545	*	7.32	8.18	4.95	3.23	1.36e-13	4.17e-12
chr13	99738756	99739256	*	5.59	6.58	0.08	6.49	1.38e-13	4.21e-12
chr19	40900495	40900995	*	6.07	7.01	2.39	4.62	1.41e-13	4.29e-12
chr1	10917918	10918418	*	6.53	7.37	4.26	3.11	1.41e-13	4.3e-12
chr21	45579946	45580446	*	8.01	8.85	5.75	3.1	1.41e-13	4.31e-12
chr2	10968930	10969430	*	6.13	7.03	3.3	3.73	1.42e-13	4.32e-12
chr1	26348510	26349010	*	5.38	6.36	0.08	6.28	1.43e-13	4.34e-12
chr1	45982625	45983125	*	5.73	6.63	2.92	3.7	1.43e-13	4.34e-12
chr15	22892167	22892667	*	5.44	6.4	1.45	4.94	1.44e-13	4.36e-12
chr1	1617910	1618410	*	5.63	6.62	-0.29	6.91	1.44e-13	4.36e-12
chr16	823812	824312	*	5.38	6.36	0.38	5.98	1.44e-13	4.36e-12
chr15	69586078	69586578	*	5.28	6.24	1.1	5.13	1.46e-13	4.41e-12
chr8	8805868	8806368	*	6.56	7.41	4.15	3.26	1.46e-13	4.43e-12
chr21	45562797	45563297	*	6.05	6.92	3.54	3.38	1.49e-13	4.5e-12
chrX	149010156	149010656	*	5.6	6.53	2.12	4.41	1.53e-13	4.61e-12
chr22	19564043	19564543	*	7.01	7.88	4.49	3.39	1.57e-13	4.73e-12
chr12	751871	752371	*	5.16	6.11	1.18	4.93	1.59e-13	4.78e-12
chr3	47618044	47618544	*	5.45	6.41	1.18	5.24	1.6e-13	4.82e-12
chr10	43789868	43790368	*	8.13	9.04	5.09	3.94	1.62e-13	4.87e-12
chr1	12237125	12237625	*	5.38	6.32	1.78	4.53	1.62e-13	4.88e-12
chr17	40902581	40903081	*	5.69	6.62	2.42	4.2	1.63e-13	4.88e-12
chr19	10083619	10084119	*	6.91	7.77	4.44	3.33	1.66e-13	4.97e-12
chr19	48114038	48114538	*	6.39	7.3	3.27	4.02	1.66e-13	4.97e-12
chr15	78423956	78424456	*	6.48	7.36	3.84	3.52	1.67e-13	5e-12
chr2	10503901	10504401	*	6.49	7.33	4.25	3.08	1.67e-13	5.01e-12
chr14	105846513	105847013	*	8.35	9.21	6	3.2	1.7e-13	5.07e-12
chr1	111682723	111683223	*	5.4	6.33	1.82	4.51	1.74e-13	5.18e-12
chr8	145595574	145596074	*	5.17	6.14	0.84	5.3	1.76e-13	5.24e-12
chr13	19755559	19756059	*	5.32	6.3	0.2	6.09	1.79e-13	5.32e-12
chr22	30605293	30605793	*	5.89	6.81	2.62	4.19	1.87e-13	5.55e-12
chr18	12272295	12272795	*	5.56	6.55	-0.29	6.84	1.87e-13	5.55e-12
chr20	61346531	61347031	*	5.57	6.51	1.98	4.52	1.88e-13	5.58e-12
chr1	16378748	16379248	*	6.07	6.99	2.91	4.08	1.91e-13	5.68e-12
chr17	37819199	37819699	*	5.92	6.82	2.9	3.93	2e-13	5.92e-12
chr1	2244001	2244501	*	7.09	8.01	3.9	4.11	2.01e-13	5.94e-12
chr10	48335265	48335765	*	5.78	6.69	2.65	4.04	2.02e-13	5.98e-12
chr8	143667607	143668107	*	6.52	7.4	3.82	3.58	2.05e-13	6.05e-12
chr15	90754365	90754865	*	7.12	7.98	4.7	3.28	2.06e-13	6.08e-12
chr8	145722144	145722644	*	6.15	7.08	2.67	4.41	2.07e-13	6.09e-12
chr6	36806774	36807274	*	6.92	7.77	4.55	3.22	2.08e-13	6.12e-12
chr2	128477202	128477702	*	5.28	6.24	1.18	5.06	2.09e-13	6.15e-12
chr2	97198108	97198608	*	5.29	6.23	1.59	4.64	2.12e-13	6.23e-12
chr3	52825674	52826174	*	5.34	6.32	0.2	6.12	2.13e-13	6.25e-12
chr19	7916759	7917259	*	5.19	6.16	0.62	5.53	2.15e-13	6.3e-12
chr11	65343440	65343940	*	5.63	6.62	-0.29	6.91	2.17e-13	6.35e-12
chr11	75221075	75221575	*	5.71	6.63	2.47	4.16	2.19e-13	6.4e-12
chr22	20252143	20252643	*	8.43	9.27	6.19	3.08	2.19e-13	6.42e-12
chr10	70782380	70782880	*	7.76	8.62	5.31	3.31	2.24e-13	6.55e-12
chr2	241733238	241733738	*	5.46	6.37	2.41	3.95	2.25e-13	6.58e-12
chr11	69924474	69924974	*	5.72	6.66	2.02	4.64	2.28e-13	6.64e-12
chr10	135015256	135015756	*	5.36	6.3	1.72	4.58	2.28e-13	6.64e-12
chr17	32906987	32907487	*	5.25	6.22	0.38	5.84	2.28e-13	6.64e-12
chr16	1838809	1839309	*	7.32	8.18	4.83	3.35	2.34e-13	6.8e-12
chr4	825354	825854	*	5.35	6.28	2.03	4.25	2.39e-13	6.96e-12
chr17	28881874	28882374	*	5.3	6.28	0.08	6.2	2.44e-13	7.07e-12
chr14	105045381	105045881	*	7.52	8.39	4.99	3.39	2.47e-13	7.17e-12
chr14	77662527	77663027	*	6.77	7.61	4.45	3.17	2.48e-13	7.17e-12
chr2	233320191	233320691	*	5.28	6.23	1.57	4.66	2.49e-13	7.21e-12
chr11	67028575	67029075	*	6.7	7.58	4	3.58	2.52e-13	7.28e-12
chr20	2674064	2674564	*	5.73	6.61	3.14	3.47	2.52e-13	7.28e-12
chr20	61950623	61951123	*	7.27	8.14	4.77	3.37	2.53e-13	7.31e-12
chr12	129056539	129057039	*	5.28	6.24	1.32	4.91	2.54e-13	7.31e-12
chr17	42287895	42288395	*	6.68	7.53	4.34	3.19	2.55e-13	7.35e-12
chr19	35222146	35222646	*	5.45	6.38	1.92	4.47	2.57e-13	7.4e-12
chr22	38624994	38625494	*	7.38	8.28	4.43	3.85	2.58e-13	7.4e-12
chr19	1295169	1295669	*	5.32	6.3	0.08	6.21	2.6e-13	7.46e-12
chr20	2741312	2741812	*	5.69	6.59	2.77	3.82	2.6e-13	7.47e-12
chr17	27044174	27044674	*	8.66	9.5	6.43	3.06	2.61e-13	7.5e-12
chr19	51534467	51534967	*	5.98	6.87	3.17	3.7	2.66e-13	7.61e-12
chr16	67700789	67701289	*	7.1	8.04	3.59	4.45	2.7e-13	7.74e-12
chr16	15081951	15082451	*	5.5	6.41	2.41	4	2.75e-13	7.85e-12
chr17	75282189	75282689	*	5.53	6.43	2.61	3.82	2.76e-13	7.88e-12
chr15	52624697	52625197	*	5.7	6.58	3.06	3.53	2.78e-13	7.92e-12
chr16	70775592	70776092	*	6.35	7.21	3.87	3.34	2.78e-13	7.92e-12
chr16	32347886	32348386	*	6.31	7.23	3.06	4.17	2.79e-13	7.94e-12
chr22	24125728	24126228	*	6.86	7.72	4.44	3.28	2.79e-13	7.94e-12
chr22	50012353	50012853	*	6.68	7.57	3.86	3.71	2.82e-13	8.01e-12
chr17	28548206	28548706	*	7.92	8.78	5.47	3.31	2.83e-13	8.04e-12
chr17	43870499	43870999	*	5.16	6.12	0.86	5.26	2.88e-13	8.18e-12
chr10	74014700	74015200	*	6.86	7.72	4.38	3.35	2.91e-13	8.26e-12
chr22	17671042	17671542	*	5.9	6.78	3.17	3.61	2.92e-13	8.26e-12
chr9	130631531	130632031	*	7.77	8.63	5.32	3.31	2.93e-13	8.28e-12
chr20	30469715	30470215	*	5.52	6.51	-0.29	6.8	2.93e-13	8.28e-12
chr16	86539729	86540229	*	5.62	6.52	2.68	3.84	2.93e-13	8.28e-12
chr18	77504040	77504540	*	5.41	6.34	2.01	4.34	2.96e-13	8.36e-12
chr19	42767545	42768045	*	5.17	6.12	1.26	4.87	2.97e-13	8.38e-12
chr16	89002518	89003018	*	5.79	6.7	2.84	3.86	2.98e-13	8.39e-12
chr19	36044002	36044502	*	7.08	7.94	4.56	3.38	3.03e-13	8.52e-12
chr6	169632682	169633182	*	6.7	7.54	4.42	3.12	3.03e-13	8.52e-12
chr17	77786717	77787217	*	7.13	8.01	4.45	3.57	3.03e-13	8.52e-12
chr11	68391109	68391609	*	7.05	7.94	4.28	3.66	3.04e-13	8.52e-12
chr4	3365941	3366441	*	5.97	6.85	3.43	3.41	3.04e-13	8.52e-12
chr10	5570787	5571287	*	5.28	6.22	1.53	4.69	3.07e-13	8.59e-12
chr11	782118	782618	*	5.27	6.22	1.23	4.99	3.14e-13	8.79e-12
chr17	78399017	78399517	*	6.02	6.93	2.99	3.94	3.16e-13	8.82e-12
chr1	16064070	16064570	*	5.51	6.49	-0.29	6.79	3.19e-13	8.91e-12
chr17	26863996	26864496	*	6.75	7.59	4.46	3.14	3.21e-13	8.94e-12
chr17	39915800	39916300	*	5.5	6.45	1.66	4.8	3.23e-13	9.01e-12
chr1	2343217	2343717	*	7.13	7.99	4.75	3.24	3.25e-13	9.04e-12
chr20	35019089	35019589	*	6.58	7.46	4.02	3.44	3.25e-13	9.05e-12
chr19	19110284	19110784	*	8.01	8.82	6.01	2.81	3.26e-13	9.06e-12
chrX	152750376	152750876	*	5.47	6.43	1.45	4.97	3.26e-13	9.06e-12
chr1	181025610	181026110	*	5.7	6.59	2.97	3.62	3.28e-13	9.1e-12
chr7	89950023	89950523	*	7.52	8.35	5.43	2.92	3.28e-13	9.1e-12
chr19	42818409	42818909	*	7.65	8.51	5.16	3.35	3.3e-13	9.13e-12
chr10	71870859	71871359	*	5.65	6.58	2.41	4.17	3.33e-13	9.22e-12
chr15	66937234	66937734	*	5.52	6.51	-0.29	6.8	3.35e-13	9.24e-12
chr6	158480628	158481128	*	5.23	6.18	1.26	4.93	3.35e-13	9.24e-12
chr1	227651673	227652173	*	5.73	6.62	3.09	3.53	3.35e-13	9.24e-12
chr16	2333066	2333566	*	5.43	6.38	1.7	4.67	3.36e-13	9.25e-12
chr9	136725592	136726092	*	5.54	6.44	2.57	3.87	3.37e-13	9.29e-12
chr5	1176440	1176940	*	6.01	6.91	3.07	3.85	3.44e-13	9.48e-12
chr7	1865322	1865822	*	5.92	6.87	2.06	4.8	3.45e-13	9.49e-12
chr8	28627705	28628205	*	5.39	6.37	0.2	6.17	3.45e-13	9.49e-12
chr17	48287112	48287612	*	6.48	7.34	4.06	3.28	3.52e-13	9.64e-12
chr11	133894949	133895449	*	6.89	7.75	4.47	3.29	3.52e-13	9.64e-12
chr22	42557414	42557914	*	6.04	6.97	2.52	4.46	3.53e-13	9.67e-12
chr17	26865965	26866465	*	5.14	6.11	0.84	5.27	3.56e-13	9.74e-12
chr11	67207217	67207717	*	5.78	6.67	3.03	3.64	3.7e-13	1.01e-11
chr19	1020466	1020966	*	5.56	6.54	-0.29	6.84	3.73e-13	1.02e-11
chr21	47208208	47208708	*	5.13	6.1	0.86	5.23	3.8e-13	1.04e-11
chr13	114795146	114795646	*	5.71	6.61	2.79	3.82	3.81e-13	1.04e-11
chr10	74082896	74083396	*	6.08	6.96	3.38	3.58	3.92e-13	1.07e-11
chr22	26430048	26430548	*	5.86	6.74	3.23	3.51	3.93e-13	1.07e-11
chr1	883789	884289	*	6.09	6.96	3.47	3.49	3.96e-13	1.08e-11
chr10	72283618	72284118	*	7.88	8.73	5.5	3.23	3.98e-13	1.08e-11
chr19	30555667	30556167	*	7.62	8.47	5.35	3.12	3.98e-13	1.08e-11
chr15	64724497	64724997	*	6.48	7.33	4.08	3.26	4e-13	1.08e-11
chr7	75666784	75667284	*	6.03	6.88	3.69	3.19	4.01e-13	1.09e-11
chr22	24163256	24163756	*	7.54	8.41	5.01	3.4	4.04e-13	1.09e-11
chr22	50754968	50755468	*	6.3	7.18	3.57	3.61	4.05e-13	1.1e-11
chr2	45160541	45161041	*	6.9	7.75	4.54	3.22	4.14e-13	1.12e-11
chr19	39369891	39370391	*	5.72	6.64	2.58	4.06	4.23e-13	1.14e-11
chr14	104012211	104012711	*	5.3	6.24	1.83	4.41	4.24e-13	1.14e-11
chr2	233306632	233307132	*	5.53	6.52	-0.29	6.81	4.28e-13	1.15e-11
chr2	241735288	241735788	*	5.72	6.67	1.98	4.69	4.32e-13	1.16e-11
chr11	1856959	1857459	*	5.16	6.1	1.42	4.68	4.33e-13	1.16e-11
chr2	2239721	2240221	*	6.1	6.99	3.39	3.59	4.39e-13	1.18e-11
chr7	1578428	1578928	*	8.51	9.37	6.03	3.34	4.43e-13	1.19e-11
chr22	46264946	46265446	*	5.13	6.07	1.47	4.6	4.47e-13	1.2e-11
chr17	37852918	37853418	*	5.28	6.22	1.57	4.65	4.6e-13	1.23e-11
chr7	100609478	100609978	*	5.54	6.53	-0.29	6.82	4.64e-13	1.24e-11
chr1	1469654	1470154	*	5.46	6.4	1.76	4.64	4.66e-13	1.25e-11
chr20	62464417	62464917	*	5.26	6.2	1.68	4.52	4.66e-13	1.25e-11
chr9	135973506	135974006	*	5.47	6.46	-0.29	6.75	4.72e-13	1.26e-11
chr5	1998364	1998864	*	5.26	6.24	0.2	6.04	4.76e-13	1.27e-11
chr19	29583890	29584390	*	5.66	6.56	2.75	3.81	4.77e-13	1.27e-11
chr7	44274629	44275129	*	5.06	6.02	1.02	5	4.77e-13	1.27e-11
chr22	36832402	36832902	*	7.6	8.48	4.92	3.56	4.8e-13	1.28e-11
chr22	19882805	19883305	*	6	6.93	2.55	4.38	4.8e-13	1.28e-11
chr1	16360658	16361158	*	5.67	6.57	2.77	3.79	4.82e-13	1.28e-11
chr6	34090500	34091000	*	6.55	7.4	4.17	3.23	4.84e-13	1.28e-11
chr19	15891216	15891716	*	5.49	6.4	2.48	3.92	4.85e-13	1.29e-11
chr1	3556976	3557476	*	5.26	6.22	1.01	5.21	4.96e-13	1.32e-11
chr2	3605517	3606017	*	5.56	6.46	2.63	3.82	5.03e-13	1.33e-11
chr20	31897350	31897850	*	5.14	6.1	0.84	5.26	5.05e-13	1.34e-11
chr10	71616816	71617316	*	7.04	7.92	4.33	3.59	5.06e-13	1.34e-11
chr9	138577115	138577615	*	7.29	8.1	5.28	2.82	5.07e-13	1.34e-11
chr19	19650565	19651065	*	5.43	6.37	1.76	4.61	5.12e-13	1.35e-11
chr14	74195177	74195677	*	6.27	7.15	3.67	3.47	5.14e-13	1.35e-11
chr9	94952096	94952596	*	5.46	6.38	2.28	4.1	5.15e-13	1.36e-11
chr12	131761251	131761751	*	6.5	7.38	3.81	3.57	5.16e-13	1.36e-11
chr20	61037149	61037649	*	5.26	6.21	1.31	4.9	5.22e-13	1.37e-11
chr20	62610214	62610714	*	7.2	8.07	4.71	3.36	5.27e-13	1.38e-11
chr1	226826834	226827334	*	5.28	6.24	1.26	4.98	5.27e-13	1.38e-11
chr11	64612245	64612745	*	6.32	7.24	3.03	4.21	5.27e-13	1.38e-11
chr22	41776928	41777428	*	8.14	8.99	5.79	3.2	5.36e-13	1.4e-11
chr1	15753552	15754052	*	5.74	6.62	3.11	3.51	5.41e-13	1.42e-11
chr21	47240033	47240533	*	5.46	6.41	1.83	4.58	5.49e-13	1.44e-11
chr8	67528313	67528813	*	5.07	6.02	1.14	4.88	5.5e-13	1.44e-11
chrX	152746709	152747209	*	5.3	6.25	1.32	4.93	5.59e-13	1.46e-11
chr2	74751160	74751660	*	5.67	6.58	2.5	4.09	5.6e-13	1.46e-11
chr14	101022591	101023091	*	5.45	6.43	-0.29	6.72	5.65e-13	1.47e-11
chr11	44949763	44950263	*	5.57	6.52	1.8	4.72	5.74e-13	1.5e-11
chr1	36795327	36795827	*	7.38	8.25	4.84	3.41	5.82e-13	1.51e-11
chr11	71127517	71128017	*	6.01	6.88	3.47	3.41	5.82e-13	1.51e-11
chr7	5620262	5620762	*	5.33	6.31	0.2	6.1	5.84e-13	1.52e-11
chr2	242154578	242155078	*	6.06	6.9	3.75	3.15	5.87e-13	1.52e-11
chr14	103541157	103541657	*	5.63	6.51	2.97	3.54	6e-13	1.56e-11
chr11	64453062	64453562	*	5.58	6.5	2.37	4.13	6e-13	1.56e-11
chr1	22221339	22221839	*	5.79	6.69	2.74	3.96	6.02e-13	1.56e-11
chr15	57833489	57833989	*	5.42	6.35	1.98	4.37	6.05e-13	1.56e-11
chr20	43272834	43273334	*	7.05	7.92	4.58	3.33	6.13e-13	1.59e-11
chr5	7464355	7464855	*	6.16	7.03	3.65	3.38	6.25e-13	1.61e-11
chr7	2191218	2191718	*	5.82	6.74	2.66	4.08	6.27e-13	1.62e-11
chr4	3294397	3294897	*	6.1	7	3.24	3.76	6.28e-13	1.62e-11
chr2	103235669	103236169	*	7.41	8.25	5.15	3.1	6.3e-13	1.62e-11
chr9	136545385	136545885	*	5.95	6.84	3.23	3.61	6.32e-13	1.63e-11
chr19	14117701	14118201	*	5.06	6.01	1.2	4.81	6.42e-13	1.65e-11
chr22	45253390	45253890	*	6.05	6.97	2.9	4.07	6.62e-13	1.7e-11
chr22	45338283	45338783	*	6.02	6.93	2.94	4	6.64e-13	1.7e-11
chr9	140075744	140076244	*	5.71	6.6	2.87	3.73	6.65e-13	1.7e-11
chr1	201349358	201349858	*	5.52	6.41	2.79	3.62	6.7e-13	1.72e-11
chr1	9673156	9673656	*	7.15	8.04	4.39	3.65	6.72e-13	1.72e-11
chr19	1166740	1167240	*	5.91	6.81	2.95	3.87	6.86e-13	1.75e-11
chr1	226060636	226061136	*	6.98	7.81	4.83	2.98	6.9e-13	1.76e-11
chr19	55811403	55811903	*	5.18	6.16	0.38	5.78	6.92e-13	1.77e-11
chr17	77704680	77705180	*	6.62	7.52	3.79	3.73	6.96e-13	1.78e-11
chr22	45625864	45626364	*	5.92	6.81	3.16	3.65	6.97e-13	1.78e-11
chr1	49145177	49145677	*	6.57	7.43	4.15	3.28	7.01e-13	1.79e-11
chr2	220411789	220412289	*	5.51	6.4	2.74	3.66	7.08e-13	1.8e-11
chr22	30141144	30141644	*	5.9	6.77	3.35	3.42	7.09e-13	1.8e-11
chr4	2427542	2428042	*	5.97	6.85	3.32	3.53	7.12e-13	1.81e-11
chr3	13460985	13461485	*	5.22	6.17	1.18	5	7.35e-13	1.87e-11
chr17	73841018	73841518	*	5.67	6.56	2.94	3.63	7.41e-13	1.88e-11
chr20	61432978	61433478	*	5.44	6.37	2.06	4.31	7.41e-13	1.88e-11
chr11	66126860	66127360	*	6.21	7.09	3.55	3.54	7.58e-13	1.92e-11
chr17	77258915	77259415	*	7.28	8.11	5.07	3.04	7.66e-13	1.94e-11
chr15	67134690	67135190	*	7.21	8.03	5.12	2.91	7.68e-13	1.94e-11
chr1	155276090	155276590	*	5.57	6.5	2.26	4.24	7.68e-13	1.94e-11
chr10	81016272	81016772	*	5.33	6.25	2.14	4.11	7.7e-13	1.94e-11
chr8	144643713	144644213	*	5.5	6.49	-0.29	6.78	7.82e-13	1.97e-11
chr4	6260672	6261172	*	5.3	6.22	2.01	4.21	7.85e-13	1.98e-11
chr12	53498970	53499470	*	5.27	6.22	1.49	4.72	7.89e-13	1.99e-11
chr2	235596373	235596873	*	7.36	8.27	4.23	4.04	7.93e-13	2e-11
chr20	62072700	62073200	*	5.6	6.54	2.1	4.43	8e-13	2.01e-11
chr15	70274877	70275377	*	6.08	7	2.87	4.13	8.12e-13	2.04e-11
chr1	178971915	178972415	*	5.73	6.65	2.5	4.15	8.23e-13	2.06e-11
chr19	45311086	45311586	*	6.24	7.1	3.77	3.33	8.25e-13	2.07e-11
chr14	93572348	93572848	*	6.18	7.11	2.93	4.17	8.35e-13	2.09e-11
chr16	32351117	32351617	*	8.44	9.28	6.19	3.09	8.37e-13	2.09e-11
chr17	48559547	48560047	*	6.76	7.7	3.28	4.42	8.57e-13	2.14e-11
chr15	74242681	74243181	*	6.8	7.71	3.84	3.86	8.7e-13	2.17e-11
chr20	61999081	61999581	*	6.27	7.17	3.29	3.88	8.71e-13	2.17e-11
chr8	145815457	145815957	*	6	6.86	3.57	3.29	8.72e-13	2.17e-11
chr22	37871713	37872213	*	6.54	7.39	4.22	3.16	8.86e-13	2.21e-11
chr18	3266181	3266681	*	5.07	6.02	1.2	4.82	8.88e-13	2.21e-11
chr16	85346750	85347250	*	7.22	8.12	4.35	3.78	8.95e-13	2.23e-11
chr5	139169617	139170117	*	5.92	6.84	2.74	4.1	9.04e-13	2.25e-11
chr11	65780104	65780604	*	5.43	6.42	-0.29	6.71	9.05e-13	2.25e-11
chr6	33247850	33248350	*	6.74	7.6	4.3	3.3	9.07e-13	2.25e-11
chr19	1325935	1326435	*	5.48	6.41	1.92	4.49	9.19e-13	2.28e-11
chr1	1222828	1223328	*	5.97	6.91	2.41	4.51	9.25e-13	2.29e-11
chr5	132108535	132109035	*	5.36	6.27	2.22	4.05	9.29e-13	2.3e-11
chr17	42843841	42844341	*	5.28	6.23	1.31	4.92	9.31e-13	2.3e-11
chr7	98968722	98969222	*	5.44	6.43	-0.29	6.72	9.43e-13	2.33e-11
chr7	151091195	151091695	*	5.05	6.02	0.48	5.54	9.44e-13	2.33e-11
chr16	19017508	19018008	*	6.3	7.18	3.68	3.49	9.49e-13	2.34e-11
chr2	241947636	241948136	*	7.04	7.91	4.51	3.4	9.65e-13	2.38e-11
chr16	70695914	70696414	*	6.18	7.09	3.13	3.96	9.71e-13	2.39e-11
chr11	70564287	70564787	*	5.42	6.33	2.36	3.97	9.79e-13	2.41e-11
chr2	241949763	241950263	*	6.51	7.37	4.08	3.29	9.86e-13	2.43e-11
chr4	3937922	3938422	*	5.48	6.46	-0.29	6.76	9.97e-13	2.45e-11
chr22	18961116	18961616	*	5.2	6.13	1.59	4.54	1e-12	2.45e-11
chr17	79480354	79480854	*	6.6	7.46	4.16	3.3	1e-12	2.46e-11
chr16	57608554	57609054	*	5.45	6.36	2.36	4	1.01e-12	2.47e-11
chr19	19173936	19174436	*	5.28	6.2	2.05	4.16	1.02e-12	2.49e-11
chrX	39547792	39548292	*	6.39	7.23	4.18	3.05	1.02e-12	2.5e-11
chr11	128750800	128751300	*	5.45	6.44	-0.29	6.73	1.02e-12	2.5e-11
chr4	6330130	6330630	*	5.16	6.14	0.08	6.06	1.03e-12	2.51e-11
chr20	61429236	61429736	*	5.83	6.71	3.24	3.47	1.03e-12	2.52e-11
chr11	64305983	64306483	*	5.25	6.2	1.49	4.7	1.05e-12	2.56e-11
chr19	56048203	56048703	*	7.75	8.64	5.08	3.56	1.05e-12	2.57e-11
chr1	7699875	7700375	*	5.91	6.79	3.19	3.6	1.06e-12	2.57e-11
chr22	46401675	46402175	*	6.53	7.4	3.98	3.42	1.06e-12	2.59e-11
chr14	105950344	105950844	*	7.05	7.9	4.7	3.2	1.07e-12	2.6e-11
chr22	50967655	50968155	*	5.15	6.13	0.08	6.05	1.07e-12	2.61e-11
chr16	49916799	49917299	*	6.31	7.15	4.03	3.12	1.07e-12	2.61e-11
chr2	241107334	241107834	*	7.93	8.77	5.65	3.12	1.08e-12	2.63e-11
chr17	80891482	80891982	*	6.3	7.12	4.14	2.98	1.09e-12	2.63e-11
chr14	91884401	91884901	*	5.16	6.14	0.38	5.76	1.09e-12	2.63e-11
chr11	68117074	68117574	*	7.29	8.09	5.31	2.78	1.09e-12	2.64e-11
chr6	3799345	3799845	*	6.07	6.94	3.51	3.43	1.11e-12	2.68e-11
chr14	106380568	106381068	*	5.2	6.13	1.79	4.35	1.11e-12	2.69e-11
chr17	1493443	1493943	*	5.84	6.73	3.14	3.59	1.12e-12	2.71e-11
chr12	54595344	54595844	*	5.38	6.36	-0.29	6.65	1.14e-12	2.74e-11
chr16	1053630	1054130	*	5.4	6.39	-0.29	6.68	1.15e-12	2.77e-11
chr11	117666571	117667071	*	5.14	6.08	1.46	4.62	1.15e-12	2.77e-11
chr7	150660260	150660760	*	5.83	6.7	3.35	3.35	1.16e-12	2.79e-11
chr17	39967337	39967837	*	6.19	7.13	2.67	4.46	1.16e-12	2.79e-11
chr2	241386896	241387396	*	7.02	7.85	4.86	3	1.16e-12	2.79e-11
chr22	38130961	38131461	*	6.07	6.99	2.78	4.21	1.17e-12	2.82e-11
chr20	57187317	57187817	*	7.05	7.91	4.56	3.36	1.18e-12	2.82e-11
chr19	54808503	54809003	*	6.45	7.29	4.16	3.13	1.23e-12	2.94e-11
chr1	42057527	42058027	*	6.24	7.13	3.47	3.66	1.24e-12	2.96e-11
chr19	3150422	3150922	*	5.81	6.75	2.17	4.58	1.24e-12	2.97e-11
chr1	111153089	111153589	*	5.45	6.37	2.19	4.18	1.24e-12	2.97e-11
chr19	35762295	35762795	*	5.5	6.38	2.91	3.47	1.25e-12	2.98e-11
chr3	50610435	50610935	*	5.48	6.46	-0.29	6.76	1.25e-12	2.99e-11
chr9	130697151	130697651	*	6.51	7.43	3.3	4.13	1.26e-12	2.99e-11
chr7	56032372	56032872	*	8.62	9.47	6.29	3.18	1.26e-12	2.99e-11
chr1	1861040	1861540	*	5.41	6.3	2.57	3.73	1.26e-12	3e-11
chr4	139936986	139937486	*	5.51	6.44	2.18	4.26	1.28e-12	3.04e-11
chr1	109817120	109817620	*	6.52	7.35	4.32	3.03	1.3e-12	3.09e-11
chr3	14175774	14176274	*	6.11	6.96	3.73	3.23	1.34e-12	3.19e-11
chr1	2262695	2263195	*	6.38	7.23	4.07	3.16	1.34e-12	3.19e-11
chr8	143761331	143761831	*	5.81	6.73	2.69	4.03	1.35e-12	3.2e-11
chr9	136362516	136363016	*	6.62	7.45	4.48	2.97	1.36e-12	3.22e-11
chr16	88833942	88834442	*	6.33	7.22	3.52	3.71	1.36e-12	3.23e-11
chr8	144647967	144648467	*	6.13	7.03	3.27	3.75	1.38e-12	3.26e-11
chr20	61946586	61947086	*	6.6	7.48	3.98	3.5	1.38e-12	3.26e-11
chr6	166239597	166240097	*	5.92	6.81	3.1	3.71	1.39e-12	3.28e-11
chr9	130319925	130320425	*	5.56	6.47	2.41	4.07	1.42e-12	3.36e-11
chr7	101341921	101342421	*	7.81	8.66	5.48	3.18	1.43e-12	3.37e-11
chr17	54671549	54672049	*	7.69	8.5	5.63	2.88	1.43e-12	3.37e-11
chr3	186317214	186317714	*	5.59	6.54	1.8	4.74	1.44e-12	3.38e-11
chr17	79208905	79209405	*	5.43	6.34	2.23	4.12	1.44e-12	3.4e-11
chr1	228396914	228397414	*	5.12	6.1	0.08	6.02	1.45e-12	3.41e-11
chr20	61698235	61698735	*	5.39	6.34	1.66	4.68	1.45e-12	3.41e-11
chr6	144607864	144608364	*	6.41	7.25	4.14	3.11	1.47e-12	3.44e-11
chrX	153055306	153055806	*	5.22	6.16	1.59	4.57	1.47e-12	3.44e-11
chr5	132087668	132088168	*	5.2	6.14	1.61	4.53	1.47e-12	3.44e-11
chr11	33898538	33899038	*	6.28	7.12	4.09	3.02	1.48e-12	3.47e-11
chr3	126026741	126027241	*	6.18	7.03	3.87	3.16	1.49e-12	3.49e-11
chr16	11706162	11706662	*	5.13	6.08	1.1	4.98	1.5e-12	3.52e-11
chr8	1792321	1792821	*	5.09	6.02	1.52	4.5	1.52e-12	3.56e-11
chr5	176516820	176517320	*	5.06	6.03	0.57	5.46	1.52e-12	3.56e-11
chr18	74835659	74836159	*	5.16	6.12	1.1	5.02	1.54e-12	3.58e-11
chr19	16124306	16124806	*	6.9	7.75	4.55	3.2	1.54e-12	3.58e-11
chr16	777300	777800	*	5.17	6.14	0.83	5.31	1.54e-12	3.58e-11
chr16	58003544	58004044	*	5.1	6.07	0.62	5.45	1.54e-12	3.58e-11
chr1	109812271	109812771	*	5.79	6.72	2.31	4.41	1.55e-12	3.59e-11
chr11	70066019	70066519	*	5.47	6.35	2.84	3.51	1.55e-12	3.59e-11
chr14	69290727	69291227	*	5.44	6.43	-0.29	6.72	1.55e-12	3.6e-11
chr1	20021349	20021849	*	6.69	7.53	4.42	3.11	1.61e-12	3.74e-11
chr4	700800	701300	*	5.25	6.17	2.03	4.14	1.63e-12	3.78e-11
chr16	2982799	2983299	*	5.03	6	0.63	5.37	1.64e-12	3.81e-11
chr7	100291052	100291552	*	5.42	6.4	-0.29	6.69	1.65e-12	3.82e-11
chr10	88714481	88714981	*	6.82	7.7	4.21	3.49	1.66e-12	3.85e-11
chr5	528640	529140	*	7.34	8.2	4.88	3.32	1.69e-12	3.9e-11
chr2	23907548	23908048	*	5.23	6.14	2.09	4.05	1.7e-12	3.93e-11
chr2	241439844	241440344	*	5.31	6.21	2.44	3.76	1.7e-12	3.94e-11
chr2	85829638	85830138	*	5.39	6.37	-0.29	6.66	1.72e-12	3.97e-11
chr22	42689453	42689953	*	6.22	7.11	3.49	3.62	1.72e-12	3.97e-11
chr17	80012383	80012883	*	5.44	6.37	2.15	4.21	1.73e-12	3.97e-11
chr21	45234262	45234762	*	5.62	6.55	2.13	4.42	1.74e-12	4.01e-11
chr19	1665719	1666219	*	6.04	6.91	3.51	3.4	1.74e-12	4.01e-11
chr10	88295035	88295535	*	5.19	6.12	1.83	4.29	1.78e-12	4.08e-11
chr17	56598338	56598838	*	7.01	7.85	4.73	3.12	1.78e-12	4.09e-11
chr7	157572190	157572690	*	5.04	6.01	0.57	5.44	1.79e-12	4.11e-11
chr22	39549398	39549898	*	5.47	6.41	1.79	4.62	1.79e-12	4.11e-11
chr22	23502726	23503226	*	6.53	7.43	3.7	3.72	1.82e-12	4.17e-11
chr17	61623769	61624269	*	5.46	6.35	2.67	3.68	1.83e-12	4.19e-11
chr10	99392759	99393259	*	5.08	6.03	1.18	4.86	1.84e-12	4.21e-11
chr15	60854146	60854646	*	6.21	7.08	3.67	3.41	1.85e-12	4.22e-11
chr20	39591318	39591818	*	5.34	6.32	-0.29	6.62	1.87e-12	4.27e-11
chr7	1424651	1425151	*	6.08	7.01	2.63	4.38	1.89e-12	4.31e-11
chr5	10562713	10563213	*	5.82	6.73	2.74	3.98	1.91e-12	4.35e-11
chr9	20684410	20684910	*	6.45	7.33	3.84	3.49	1.92e-12	4.37e-11
chr22	50312428	50312928	*	5.03	5.98	1.01	4.97	1.93e-12	4.41e-11
chr21	45604968	45605468	*	5.66	6.57	2.63	3.94	1.95e-12	4.44e-11
chr20	31914876	31915376	*	5.93	6.8	3.47	3.32	1.97e-12	4.48e-11
chr2	23815007	23815507	*	6.65	7.48	4.46	3.02	1.97e-12	4.48e-11
chr11	75236422	75236922	*	5.19	6.15	1.02	5.12	2e-12	4.54e-11
chr15	91432751	91433251	*	5.82	6.71	3.05	3.66	2e-12	4.54e-11
chr1	2368311	2368811	*	5.64	6.54	2.69	3.85	2.02e-12	4.57e-11
chr11	68540856	68541356	*	5.2	6.12	2.03	4.1	2.02e-12	4.58e-11
chr3	47027035	47027535	*	5.05	6	1.24	4.76	2.03e-12	4.6e-11
chr16	1097643	1098143	*	5.02	5.95	1.55	4.4	2.04e-12	4.61e-11
chr10	81898124	81898624	*	5.09	6.04	1.18	4.86	2.04e-12	4.62e-11
chr9	124378990	124379490	*	5.98	6.84	3.53	3.31	2.05e-12	4.62e-11
chr18	33160984	33161484	*	7.4	8.26	5.04	3.21	2.07e-12	4.67e-11
chr11	72394923	72395423	*	5.61	6.51	2.66	3.85	2.07e-12	4.68e-11
chr1	228359090	228359590	*	7.19	8.12	3.78	4.35	2.08e-12	4.7e-11
chr22	50117890	50118390	*	6.96	7.86	4.14	3.72	2.09e-12	4.72e-11
chr22	47008997	47009497	*	6.1	6.99	3.34	3.64	2.1e-12	4.72e-11
chr1	26107501	26108001	*	6.68	7.55	4.1	3.45	2.11e-12	4.74e-11
chr1	19670368	19670868	*	5.75	6.64	2.97	3.67	2.11e-12	4.75e-11
chr9	22154254	22154754	*	4.97	5.93	0.62	5.31	2.12e-12	4.76e-11
chr15	85874203	85874703	*	6.39	7.3	3.29	4.01	2.16e-12	4.85e-11
chr20	42543722	42544222	*	5.23	6.18	1.45	4.72	2.17e-12	4.86e-11
chr20	3827694	3828194	*	5.36	6.29	2.04	4.25	2.19e-12	4.91e-11
chr18	12376667	12377167	*	5.14	6.12	0.08	6.04	2.2e-12	4.92e-11
chr9	136026438	136026938	*	5.3	6.29	-0.29	6.58	2.2e-12	4.92e-11
chr6	169777560	169778060	*	5.65	6.53	2.93	3.61	2.2e-12	4.92e-11
chr15	57887589	57888089	*	6.4	7.23	4.23	3	2.25e-12	5.04e-11
chr6	43473345	43473845	*	5.4	6.32	2.15	4.18	2.27e-12	5.06e-11
chr1	19970224	19970724	*	5.13	6.09	0.97	5.12	2.28e-12	5.09e-11
chr1	12175472	12175972	*	5.22	6.15	1.83	4.33	2.3e-12	5.12e-11
chr4	7457202	7457702	*	7.14	8	4.69	3.32	2.33e-12	5.19e-11
chr7	2515302	2515802	*	5.33	6.22	2.53	3.69	2.34e-12	5.21e-11
chr1	3191841	3192341	*	5.8	6.71	2.82	3.88	2.34e-12	5.21e-11
chr17	17686344	17686844	*	6.09	6.93	3.81	3.12	2.37e-12	5.26e-11
chr20	61374926	61375426	*	5.34	6.33	-0.29	6.62	2.37e-12	5.27e-11
chr20	62420649	62421149	*	5.22	6.17	1.45	4.71	2.38e-12	5.27e-11
chr19	42512224	42512724	*	4.99	5.95	0.84	5.11	2.42e-12	5.37e-11
chr5	178157006	178157506	*	5.31	6.29	-0.29	6.58	2.46e-12	5.44e-11
chr16	1790923	1791423	*	6.76	7.66	3.74	3.92	2.46e-12	5.45e-11
chr1	29446936	29447436	*	5.23	6.16	1.79	4.37	2.47e-12	5.46e-11
chr11	61507509	61508009	*	6.25	7.09	3.99	3.1	2.48e-12	5.48e-11
chr2	121955057	121955557	*	6.39	7.22	4.26	2.96	2.48e-12	5.48e-11
chr18	13583707	13584207	*	7.44	8.27	5.3	2.97	2.51e-12	5.54e-11
chr16	89939214	89939714	*	4.95	5.92	0.62	5.3	2.52e-12	5.56e-11
chr3	49030261	49030761	*	5.39	6.31	2.22	4.08	2.55e-12	5.61e-11
chr2	88515011	88515511	*	6.24	7.11	3.63	3.48	2.56e-12	5.65e-11
chr13	41239366	41239866	*	7.52	8.35	5.37	2.98	2.58e-12	5.67e-11
chr2	95670004	95670504	*	6.93	7.77	4.63	3.14	2.6e-12	5.72e-11
chr4	2299384	2299884	*	5.47	6.4	2.12	4.28	2.61e-12	5.73e-11
chr7	157577732	157578232	*	5	5.97	0.63	5.34	2.61e-12	5.73e-11
chr19	995945	996445	*	5.73	6.62	2.94	3.68	2.62e-12	5.76e-11
chr14	100208021	100208521	*	6.66	7.5	4.39	3.11	2.67e-12	5.85e-11
chr17	36849151	36849651	*	7.07	7.92	4.72	3.21	2.69e-12	5.91e-11
chr22	45555703	45556203	*	5.8	6.69	3.01	3.68	2.7e-12	5.91e-11
chr20	57284462	57284962	*	6.17	7.02	3.83	3.18	2.7e-12	5.92e-11
chr18	14450160	14450660	*	5.34	6.27	1.99	4.27	2.71e-12	5.92e-11
chr9	130493035	130493535	*	7.84	8.71	5.34	3.37	2.72e-12	5.95e-11
chr16	87425210	87425710	*	6.62	7.47	4.34	3.13	2.76e-12	6.02e-11
chr17	72459122	72459622	*	5.59	6.53	1.89	4.64	2.77e-12	6.05e-11
chr17	73509580	73510080	*	5.16	6.12	0.83	5.29	2.79e-12	6.08e-11
chr1	9048888	9049388	*	4.97	5.9	1.48	4.42	2.83e-12	6.16e-11
chr15	70637012	70637512	*	5.26	6.18	2.05	4.13	2.88e-12	6.27e-11
chr2	241658808	241659308	*	7.58	8.46	4.94	3.53	2.88e-12	6.27e-11
chr1	110684275	110684775	*	6.22	7.05	4.02	3.04	2.88e-12	6.27e-11
chr17	72913595	72914095	*	6.92	7.78	4.54	3.24	2.89e-12	6.28e-11
chr5	179820831	179821331	*	6.26	7.13	3.79	3.34	2.9e-12	6.29e-11
chr16	3627237	3627737	*	4.97	5.94	0.62	5.32	2.9e-12	6.3e-11
chr9	129461360	129461860	*	5.22	6.16	1.57	4.59	2.93e-12	6.35e-11
chr22	46384198	46384698	*	5.25	6.19	1.74	4.45	2.93e-12	6.36e-11
chr9	36761036	36761536	*	6.27	7.1	4.16	2.94	2.96e-12	6.42e-11
chr10	100227786	100228286	*	6.37	7.22	4.03	3.2	2.98e-12	6.44e-11
chr16	1508217	1508717	*	5.64	6.56	2.37	4.18	2.99e-12	6.46e-11
chr11	74883141	74883641	*	5.29	6.2	2.19	4.01	3.02e-12	6.53e-11
chr19	17826086	17826586	*	6.27	7.11	4.01	3.1	3.04e-12	6.57e-11
chr17	62040040	62040540	*	5.32	6.31	-0.29	6.6	3.05e-12	6.57e-11
chr22	30926726	30927226	*	4.99	5.96	0.38	5.57	3.07e-12	6.6e-11
chr14	105191137	105191637	*	5.1	6.02	1.87	4.15	3.07e-12	6.6e-11
chr22	19863759	19864259	*	5.37	6.35	-0.29	6.64	3.07e-12	6.61e-11
chr12	130965436	130965936	*	7.19	8.06	4.68	3.38	3.08e-12	6.63e-11
chr22	41470806	41471306	*	5.45	6.38	2.23	4.14	3.11e-12	6.69e-11
chr1	29630604	29631104	*	6.41	7.23	4.32	2.91	3.14e-12	6.74e-11
chr11	118476262	118476762	*	5.74	6.6	3.3	3.3	3.15e-12	6.77e-11
chr21	27106746	27107246	*	5.01	5.96	1.01	4.95	3.16e-12	6.77e-11
chr11	67074828	67075328	*	6.53	7.4	3.98	3.42	3.2e-12	6.85e-11
chr1	17882032	17882532	*	5.01	5.95	1.43	4.51	3.21e-12	6.87e-11
chr6	169242886	169243386	*	6.65	7.57	3.41	4.15	3.22e-12	6.88e-11
chr7	5632430	5632930	*	7.63	8.48	5.32	3.16	3.22e-12	6.89e-11
chr9	139151656	139152156	*	5.56	6.44	2.91	3.54	3.24e-12	6.93e-11
chr12	110062737	110063237	*	5.98	6.89	2.91	3.98	3.27e-12	6.98e-11
chr22	46466820	46467320	*	6.09	7.01	2.83	4.19	3.3e-12	7.05e-11
chr22	21349286	21349786	*	5.8	6.74	2.23	4.5	3.32e-12	7.08e-11
chr5	1109426	1109926	*	5.32	6.3	-0.29	6.59	3.41e-12	7.28e-11
chr11	66114252	66114752	*	5.27	6.21	1.59	4.62	3.52e-12	7.49e-11
chr5	179563278	179563778	*	5	5.96	0.86	5.1	3.58e-12	7.61e-11
chr17	73342704	73343204	*	5.39	6.31	2.08	4.23	3.59e-12	7.63e-11
chr5	180229497	180229997	*	6.02	6.87	3.67	3.2	3.6e-12	7.65e-11
chr16	1030614	1031114	*	6.73	7.59	4.32	3.27	3.62e-12	7.69e-11
chr14	105198744	105199244	*	4.96	5.92	0.84	5.08	3.65e-12	7.75e-11
chr13	28386022	28386522	*	6.29	7.14	3.91	3.23	3.66e-12	7.76e-11
chr15	85491182	85491682	*	6.76	7.67	3.64	4.03	3.67e-12	7.78e-11
chr15	100289952	100290452	*	6.42	7.27	4.08	3.19	3.67e-12	7.78e-11
chr10	65471131	65471631	*	4.98	5.93	1.08	4.85	3.74e-12	7.91e-11
chr19	38986644	38987144	*	5.87	6.75	3.3	3.44	3.77e-12	7.97e-11
chr20	61941626	61942126	*	6.34	7.18	4.03	3.15	3.78e-12	7.99e-11
chr9	138444346	138444846	*	5.55	6.43	2.79	3.64	3.8e-12	8.03e-11
chr11	46360881	46361381	*	6.2	7.04	3.98	3.06	3.84e-12	8.11e-11
chr19	51688662	51689162	*	6.06	6.97	3.05	3.92	3.85e-12	8.12e-11
chr17	17415670	17416170	*	5.47	6.41	2.05	4.36	3.88e-12	8.17e-11
chr15	42151594	42152094	*	5.02	5.99	0.57	5.42	3.88e-12	8.17e-11
chr11	74951659	74952159	*	8.29	9.12	6.16	2.96	3.9e-12	8.2e-11
chr5	175961248	175961748	*	5	5.96	0.63	5.33	3.96e-12	8.33e-11
chr11	71164203	71164703	*	5.32	6.24	2.09	4.15	3.97e-12	8.35e-11
chr21	46184586	46185086	*	5.48	6.4	2.18	4.22	4.01e-12	8.41e-11
chr14	24530548	24531048	*	5.83	6.72	3.03	3.69	4.01e-12	8.42e-11
chr2	239200205	239200705	*	4.98	5.95	0.38	5.58	4.01e-12	8.42e-11
chr11	764961	765461	*	5.45	6.36	2.34	4.02	4.02e-12	8.42e-11
chr3	46746279	46746779	*	8.21	9.09	5.55	3.53	4.02e-12	8.42e-11
chr2	220093683	220094183	*	8.21	9.06	5.79	3.27	4.06e-12	8.5e-11
chr1	17594070	17594570	*	6.49	7.33	4.26	3.07	4.09e-12	8.56e-11
chr7	76000192	76000692	*	5.38	6.28	2.48	3.8	4.1e-12	8.58e-11
chr16	2050310	2050810	*	6.38	7.21	4.27	2.93	4.11e-12	8.58e-11
chr20	31598531	31599031	*	5.09	6	2.08	3.92	4.12e-12	8.6e-11
chr12	131873547	131874047	*	6	6.87	3.51	3.35	4.13e-12	8.62e-11
chr19	2454302	2454802	*	5.97	6.84	3.42	3.42	4.14e-12	8.62e-11
chr8	145675235	145675735	*	5.34	6.33	-0.29	6.62	4.16e-12	8.67e-11
chr1	3627727	3628227	*	4.97	5.9	1.6	4.3	4.32e-12	8.99e-11
chr17	80227933	80228433	*	5.34	6.25	2.31	3.94	4.35e-12	9.05e-11
chr1	32139475	32139975	*	6.95	7.84	4.26	3.57	4.41e-12	9.16e-11
chr6	71998695	71999195	*	7.48	8.29	5.48	2.81	4.42e-12	9.17e-11
chr7	66133814	66134314	*	5.32	6.24	2.05	4.19	4.43e-12	9.19e-11
chr7	5629815	5630315	*	5.16	6.1	1.55	4.56	4.43e-12	9.19e-11
chr17	79791463	79791963	*	7.77	8.63	5.31	3.32	4.45e-12	9.22e-11
chr17	79780321	79780821	*	5.08	6.02	1.32	4.7	4.47e-12	9.25e-11
chr8	143276657	143277157	*	8.71	9.54	6.47	3.07	4.49e-12	9.3e-11
chr17	26859772	26860272	*	6.87	7.7	4.65	3.05	4.5e-12	9.3e-11
chr22	48948859	48949359	*	5.09	6.04	1.18	4.86	4.51e-12	9.33e-11
chr1	17599365	17599865	*	5.18	6.15	0.2	5.95	4.52e-12	9.33e-11
chr19	45664438	45664938	*	5.47	6.37	2.66	3.71	4.52e-12	9.33e-11
chr1	226094043	226094543	*	5.48	6.39	2.47	3.91	4.54e-12	9.36e-11
chr10	102376753	102377253	*	5.8	6.65	3.45	3.2	4.56e-12	9.38e-11
chr17	48676950	48677450	*	4.96	5.92	1.01	4.9	4.56e-12	9.38e-11
chr8	144700097	144700597	*	5.75	6.64	3.01	3.63	4.6e-12	9.47e-11
chr19	39694649	39695149	*	5.05	6.02	0.08	5.94	4.61e-12	9.48e-11
chr11	1155943	1156443	*	5.59	6.45	3.06	3.39	4.64e-12	9.53e-11
chr11	133903026	133903526	*	5.78	6.66	3.11	3.55	4.64e-12	9.53e-11
chr16	57171631	57172131	*	7.46	8.3	5.21	3.1	4.67e-12	9.58e-11
chr20	25031504	25032004	*	5.12	6.07	1.18	4.89	4.68e-12	9.61e-11
chr7	100928520	100929020	*	5.43	6.32	2.58	3.74	4.69e-12	9.61e-11
chr8	21980118	21980618	*	6.02	6.89	3.56	3.33	4.69e-12	9.61e-11
chr10	134279349	134279849	*	5.65	6.56	2.51	4.05	4.71e-12	9.65e-11
chr19	1907661	1908161	*	7.33	8.16	5.2	2.96	4.72e-12	9.66e-11
chr1	228582685	228583185	*	5.21	6.19	-0.29	6.48	4.76e-12	9.73e-11
chr19	2376462	2376962	*	6.23	7.12	3.42	3.7	4.76e-12	9.73e-11
chr2	233309467	233309967	*	5.68	6.59	2.58	4.01	4.77e-12	9.74e-11
chr1	29814321	29814821	*	5.52	6.42	2.56	3.86	4.78e-12	9.76e-11
chr7	157934431	157934931	*	5.24	6.22	-0.29	6.51	4.87e-12	9.93e-11
chr12	112229053	112229553	*	6.27	7.12	3.91	3.21	4.9e-12	9.99e-11
chr16	71446026	71446526	*	5.32	6.23	2.2	4.03	4.96e-12	1.01e-10
chr11	64631562	64632062	*	5.88	6.79	2.78	4.01	4.97e-12	1.01e-10
chr8	142294070	142294570	*	5.59	6.45	3.07	3.38	4.98e-12	1.01e-10
chr1	26856238	26856738	*	5.32	6.3	-0.29	6.59	5.01e-12	1.02e-10
chr14	103244058	103244558	*	4.94	5.9	0.62	5.28	5.02e-12	1.02e-10
chr16	21554449	21554949	*	5.18	6.09	2.17	3.91	5.04e-12	1.02e-10
chr4	185394423	185394923	*	7.45	8.26	5.47	2.79	5.05e-12	1.02e-10
chr16	1464121	1464621	*	5.25	6.18	1.8	4.38	5.1e-12	1.03e-10
chr16	67768895	67769395	*	6.26	7.09	4.05	3.04	5.13e-12	1.04e-10
chr19	30007158	30007658	*	5.2	6.12	1.97	4.16	5.14e-12	1.04e-10
chr17	1227436	1227936	*	6.53	7.42	3.78	3.64	5.22e-12	1.06e-10
chr19	13204127	13204627	*	6.19	7.04	3.79	3.25	5.23e-12	1.06e-10
chr17	37772051	37772551	*	6.32	7.17	4.02	3.15	5.25e-12	1.06e-10
chr7	157658288	157658788	*	6.17	7.02	3.78	3.25	5.3e-12	1.07e-10
chr17	42987667	42988167	*	7.18	8.03	4.83	3.19	5.37e-12	1.08e-10
chr11	71505679	71506179	*	4.9	5.86	0.62	5.24	5.4e-12	1.09e-10
chr9	132804692	132805192	*	5.32	6.3	-0.29	6.59	5.46e-12	1.1e-10
chr2	233198529	233199029	*	5.38	6.32	1.79	4.53	5.48e-12	1.1e-10
chr20	3650741	3651241	*	7.7	8.54	5.47	3.07	5.5e-12	1.11e-10
chr3	38073850	38074350	*	5.8	6.66	3.42	3.23	5.51e-12	1.11e-10
chr22	20005079	20005579	*	5.28	6.22	1.58	4.64	5.55e-12	1.11e-10
chr15	75512381	75512881	*	6.7	7.56	4.3	3.26	5.56e-12	1.12e-10
chr9	124527749	124528249	*	6.03	6.91	3.46	3.44	5.56e-12	1.12e-10
chr20	61583711	61584211	*	8.55	9.36	6.59	2.77	5.56e-12	1.12e-10
chr7	359245	359745	*	5.17	6.1	1.78	4.32	5.57e-12	1.12e-10
chr14	104658510	104659010	*	5.27	6.16	2.49	3.66	5.57e-12	1.12e-10
chr17	1550717	1551217	*	4.96	5.91	0.97	4.94	5.58e-12	1.12e-10
chr16	68276935	68277435	*	4.93	5.89	0.57	5.33	5.59e-12	1.12e-10
chr17	18923107	18923607	*	7.45	8.32	4.88	3.44	5.59e-12	1.12e-10
chr12	113826082	113826582	*	6.61	7.47	4.21	3.26	5.61e-12	1.12e-10
chr22	38142502	38143002	*	6.07	7	2.76	4.24	5.61e-12	1.12e-10
chr19	47267586	47268086	*	5.02	5.96	1.55	4.41	5.65e-12	1.13e-10
chr10	48371105	48371605	*	5.22	6.17	1.31	4.85	5.73e-12	1.14e-10
chr1	3206204	3206704	*	4.99	5.96	0.38	5.59	5.82e-12	1.16e-10
chr2	88359675	88360175	*	5.92	6.82	3.03	3.8	5.82e-12	1.16e-10
chr20	25198971	25199471	*	4.97	5.92	1.04	4.88	5.83e-12	1.16e-10
chr1	53392935	53393435	*	5.23	6.21	-0.29	6.5	5.93e-12	1.18e-10
chr5	1539519	1540019	*	6.92	7.77	4.56	3.21	5.96e-12	1.18e-10
chr20	62461554	62462054	*	6.16	7	3.91	3.09	6.03e-12	1.2e-10
chr8	144479343	144479843	*	6.14	6.97	3.99	2.98	6.06e-12	1.2e-10
chr22	31277731	31278231	*	4.94	5.9	1.01	4.88	6.08e-12	1.21e-10
chr22	49086414	49086914	*	4.9	5.86	0.84	5.02	6.13e-12	1.21e-10
chr4	15999281	15999781	*	4.94	5.91	0.38	5.52	6.25e-12	1.24e-10
chr22	44459581	44460081	*	5.13	6.06	1.69	4.37	6.44e-12	1.27e-10
chr3	50585177	50585677	*	5.13	6.03	2.11	3.92	6.52e-12	1.29e-10
chr19	1129494	1129994	*	5.51	6.45	2.02	4.42	6.54e-12	1.29e-10
chr14	101034240	101034740	*	5.05	6	1.18	4.82	6.55e-12	1.29e-10
chr12	12014340	12014840	*	4.98	5.96	0.08	5.88	6.59e-12	1.3e-10
chr9	136515051	136515551	*	5.79	6.67	3.15	3.52	6.63e-12	1.31e-10
chr20	57543051	57543551	*	7.81	8.63	5.76	2.87	6.64e-12	1.31e-10
chr10	551302	551802	*	5.06	6	1.32	4.68	6.72e-12	1.32e-10
chr16	85662825	85663325	*	5.42	6.33	2.26	4.07	6.74e-12	1.33e-10
chr11	65787942	65788442	*	5.29	6.19	2.44	3.74	6.75e-12	1.33e-10
chr16	1872270	1872770	*	7.03	7.89	4.67	3.22	6.75e-12	1.33e-10
chr4	8594162	8594662	*	5.25	6.23	-0.29	6.52	6.84e-12	1.34e-10
chr17	78084946	78085446	*	5.48	6.41	2.15	4.26	7.14e-12	1.4e-10
chr22	44614021	44614521	*	5.31	6.21	2.47	3.74	7.17e-12	1.41e-10
chr12	11370371	11370871	*	4.9	5.86	0.86	5	7.18e-12	1.41e-10
chr4	672989	673489	*	6.56	7.47	3.59	3.88	7.29e-12	1.43e-10
chr1	62208179	62208679	*	7.42	8.31	4.67	3.64	7.33e-12	1.44e-10
chr17	58083290	58083790	*	6.04	6.92	3.42	3.5	7.57e-12	1.48e-10
chr12	52680864	52681364	*	6.28	7.18	3.32	3.86	7.59e-12	1.49e-10
chr20	25604187	25604687	*	5.06	6.04	0.08	5.95	7.68e-12	1.5e-10
chr20	36790265	36790765	*	6.39	7.21	4.28	2.93	7.9e-12	1.54e-10
chr2	239049835	239050335	*	6.05	6.92	3.54	3.39	7.97e-12	1.56e-10
chr22	50421299	50421799	*	5.56	6.45	2.78	3.67	8e-12	1.56e-10
chr8	143679248	143679748	*	7.15	8.02	4.67	3.35	8.02e-12	1.56e-10
chr5	177962652	177963152	*	5.14	6.13	-0.29	6.42	8.06e-12	1.57e-10
chr22	25335120	25335620	*	4.96	5.91	1.1	4.8	8.08e-12	1.57e-10
chr1	111745705	111746205	*	6.75	7.6	4.39	3.21	8.11e-12	1.58e-10
chr12	133218654	133219154	*	5.75	6.67	2.61	4.06	8.14e-12	1.58e-10
chr4	3296447	3296947	*	5.45	6.36	2.33	4.03	8.14e-12	1.58e-10
chr1	45789315	45789815	*	5.49	6.36	2.97	3.39	8.25e-12	1.6e-10
chr3	53737859	53738359	*	5.14	6.07	1.83	4.24	8.38e-12	1.63e-10
chr10	71933652	71934152	*	6.05	6.89	3.79	3.1	8.46e-12	1.64e-10
chr9	134699863	134700363	*	5.78	6.64	3.37	3.27	8.49e-12	1.65e-10
chr17	1953382	1953882	*	6.63	7.55	3.28	4.28	8.61e-12	1.67e-10
chr20	62703582	62704082	*	5.15	6.13	-0.29	6.43	8.62e-12	1.67e-10
chr7	75915850	75916350	*	6.6	7.41	4.56	2.84	8.66e-12	1.67e-10
chr16	57095245	57095745	*	5.89	6.72	3.64	3.08	8.74e-12	1.69e-10
chr7	73470880	73471380	*	6.02	6.88	3.62	3.25	8.74e-12	1.69e-10
chr7	100659036	100659536	*	5.96	6.8	3.75	3.05	8.74e-12	1.69e-10
chr22	19790513	19791013	*	6.69	7.58	3.9	3.68	8.94e-12	1.73e-10
chr17	73072921	73073421	*	6.49	7.3	4.41	2.89	8.99e-12	1.73e-10
chr9	140006206	140006706	*	6.53	7.39	4.05	3.34	9.03e-12	1.74e-10
chr1	26873319	26873819	*	6.15	7	3.86	3.13	9.08e-12	1.75e-10
chr16	3541217	3541717	*	5.23	6.22	-0.29	6.51	9.1e-12	1.75e-10
chr20	34707438	34707938	*	5.37	6.29	2.1	4.2	9.1e-12	1.75e-10
chr19	18507189	18507689	*	5.78	6.69	2.72	3.96	9.17e-12	1.76e-10
chr8	143300683	143301183	*	5.35	6.25	2.47	3.78	9.19e-12	1.76e-10
chr20	62226734	62227234	*	6.03	6.89	3.61	3.28	9.3e-12	1.78e-10
chr20	62138786	62139286	*	7.98	8.87	5.24	3.63	9.41e-12	1.81e-10
chr14	105610353	105610853	*	5.37	6.24	2.78	3.46	9.51e-12	1.82e-10
chr11	60850412	60850912	*	5.42	6.33	2.37	3.96	9.6e-12	1.84e-10
chr20	62680642	62681142	*	5.18	6.16	0.08	6.08	9.6e-12	1.84e-10
chr17	75062319	75062819	*	5.12	6.1	-0.29	6.4	9.69e-12	1.85e-10
chr7	2357147	2357647	*	5.57	6.49	2.3	4.19	9.7e-12	1.85e-10
chr5	118406690	118407190	*	5.43	6.35	2.24	4.1	9.72e-12	1.86e-10
chr13	113659680	113660180	*	5.73	6.6	3.1	3.5	9.75e-12	1.86e-10
chr1	27238167	27238667	*	5.83	6.68	3.54	3.14	9.78e-12	1.87e-10
chr17	79098482	79098982	*	6.61	7.52	3.6	3.91	9.86e-12	1.88e-10
chr10	134611596	134612096	*	5.69	6.55	3.27	3.28	9.89e-12	1.89e-10
chr13	114506640	114507140	*	5.57	6.5	2.17	4.33	9.91e-12	1.89e-10
chr22	27049457	27049957	*	6.16	6.98	4.06	2.92	9.93e-12	1.89e-10
chr7	158203372	158203872	*	6.05	6.92	3.53	3.39	9.93e-12	1.89e-10
chr5	32173972	32174472	*	5.89	6.82	2.49	4.33	9.96e-12	1.89e-10
chr11	64027122	64027622	*	7.28	8.15	4.8	3.35	1e-11	1.91e-10
chr16	3116788	3117288	*	5.53	6.45	2.41	4.04	1.01e-11	1.91e-10
chr1	53494300	53494800	*	5.59	6.49	2.8	3.69	1.01e-11	1.92e-10
chr8	142662938	142663438	*	7.75	8.58	5.61	2.97	1.02e-11	1.93e-10
chr20	33874061	33874561	*	4.94	5.9	0.83	5.07	1.02e-11	1.93e-10
chr9	139016127	139016627	*	5.79	6.66	3.29	3.37	1.02e-11	1.93e-10
chr21	45887547	45888047	*	5.25	6.13	2.61	3.52	1.02e-11	1.94e-10
chr7	1129854	1130354	*	5.09	6.04	1.32	4.72	1.04e-11	1.97e-10
chr22	25960959	25961459	*	5.91	6.84	2.37	4.47	1.05e-11	1.99e-10
chr17	79953855	79954355	*	5.93	6.84	2.97	3.87	1.07e-11	2.02e-10
chr22	40043165	40043665	*	4.94	5.88	1.33	4.56	1.07e-11	2.02e-10
chr7	73007390	73007890	*	5.79	6.7	2.87	3.82	1.08e-11	2.03e-10
chr3	51995108	51995608	*	5.21	6.2	-0.29	6.49	1.08e-11	2.03e-10
chr2	239947999	239948499	*	7.06	7.93	4.53	3.4	1.08e-11	2.03e-10
chr7	158656437	158656937	*	5.79	6.67	3.08	3.59	1.08e-11	2.04e-10
chr7	100079961	100080461	*	5.46	6.4	1.89	4.51	1.08e-11	2.04e-10
chr17	7162656	7163156	*	5.16	6.07	2.13	3.94	1.09e-11	2.04e-10
chr17	61774147	61774647	*	5.44	6.33	2.78	3.54	1.09e-11	2.04e-10
chr22	39239934	39240434	*	5.2	6.18	-0.29	6.48	1.09e-11	2.04e-10
chr22	31042242	31042742	*	5.2	6.18	-0.29	6.47	1.09e-11	2.04e-10
chr15	75485039	75485539	*	5.7	6.63	2.14	4.49	1.1e-11	2.06e-10
chr8	142113396	142113896	*	4.98	5.94	1.01	4.92	1.11e-11	2.09e-10
chr22	43147782	43148282	*	6.85	7.77	3.64	4.13	1.12e-11	2.1e-10
chr1	910033	910533	*	6.81	7.66	4.48	3.18	1.12e-11	2.1e-10
chr19	17766253	17766753	*	4.92	5.85	1.52	4.33	1.13e-11	2.11e-10
chr7	44366847	44367347	*	5.67	6.6	2.36	4.23	1.13e-11	2.12e-10
chr10	79290972	79291472	*	6.06	6.92	3.6	3.32	1.13e-11	2.12e-10
chr11	65183030	65183530	*	5.36	6.27	2.15	4.13	1.14e-11	2.13e-10
chr3	49208612	49209112	*	5.98	6.81	3.81	3.01	1.15e-11	2.14e-10
chr22	19714684	19715184	*	5.32	6.21	2.59	3.62	1.15e-11	2.14e-10
chr6	43880189	43880689	*	6.43	7.25	4.32	2.93	1.15e-11	2.15e-10
chr11	63901399	63901899	*	6.51	7.34	4.31	3.03	1.16e-11	2.16e-10
chr9	138589075	138589575	*	5.14	6.12	-0.29	6.41	1.16e-11	2.17e-10
chr7	2164060	2164560	*	5.8	6.67	3.32	3.34	1.17e-11	2.17e-10
chr11	76371956	76372456	*	7.41	8.26	5.11	3.15	1.17e-11	2.17e-10
chr22	43029269	43029769	*	5.69	6.6	2.7	3.89	1.17e-11	2.18e-10
chr10	76994962	76995462	*	6.19	7.08	3.36	3.72	1.19e-11	2.2e-10
chr19	39906530	39907030	*	4.89	5.86	0.38	5.48	1.19e-11	2.21e-10
chr14	89883535	89884035	*	7.31	8.1	5.4	2.7	1.21e-11	2.24e-10
chr8	144223889	144224389	*	6.95	7.83	4.27	3.57	1.21e-11	2.24e-10
chr8	136468891	136469391	*	6.33	7.18	4.04	3.13	1.21e-11	2.25e-10
chr16	89702144	89702644	*	6.71	7.62	3.65	3.96	1.22e-11	2.25e-10
chr1	2340202	2340702	*	5.45	6.32	2.92	3.4	1.22e-11	2.25e-10
chr22	20226021	20226521	*	5.14	6.11	0.38	5.73	1.23e-11	2.27e-10
chr6	168502112	168502612	*	5.99	6.85	3.59	3.26	1.23e-11	2.27e-10
chr16	87881334	87881834	*	4.99	5.95	1.02	4.92	1.23e-11	2.28e-10
chr20	35981054	35981554	*	6.21	7.1	3.33	3.78	1.24e-11	2.29e-10
chr22	38903908	38904408	*	5.92	6.84	2.69	4.15	1.25e-11	2.3e-10
chr11	1115579	1116079	*	5.64	6.52	3.03	3.48	1.25e-11	2.3e-10
chr9	136663801	136664301	*	4.87	5.84	0.63	5.21	1.25e-11	2.31e-10
chr6	31347808	31348308	*	5.38	6.26	2.72	3.54	1.26e-11	2.32e-10
chr22	38461191	38461691	*	7.62	8.44	5.52	2.92	1.26e-11	2.32e-10
chr4	1563187	1563687	*	5.35	6.29	1.9	4.39	1.27e-11	2.33e-10
chr16	1876171	1876671	*	5.4	6.28	2.73	3.55	1.27e-11	2.33e-10
chr22	30778897	30779397	*	8.44	9.28	6.21	3.07	1.28e-11	2.34e-10
chr2	120984226	120984726	*	5.09	6.08	-0.29	6.37	1.28e-11	2.36e-10
chr22	50300676	50301176	*	6.15	7.07	2.95	4.12	1.28e-11	2.36e-10
chr3	50340593	50341093	*	6.18	7.06	3.52	3.55	1.29e-11	2.36e-10
chr1	161047235	161047735	*	5.79	6.62	3.57	3.05	1.29e-11	2.36e-10
chr22	44273621	44274121	*	5.9	6.74	3.56	3.18	1.3e-11	2.37e-10
chr22	51116471	51116971	*	5.18	6.11	1.68	4.43	1.3e-11	2.38e-10
chr15	76010425	76010925	*	5.14	6.12	-0.29	6.42	1.3e-11	2.39e-10
chr11	68843708	68844208	*	5.08	6	1.73	4.27	1.31e-11	2.4e-10
chr16	2560198	2560698	*	5.1	6.08	-0.29	6.37	1.33e-11	2.43e-10
chr9	139863552	139864052	*	6.02	6.93	3.02	3.91	1.35e-11	2.46e-10
chr19	42853805	42854305	*	5.16	6.11	1.18	4.93	1.35e-11	2.46e-10
chr9	95784463	95784963	*	5.27	6.18	2.23	3.95	1.36e-11	2.49e-10
chr20	48763013	48763513	*	6.6	7.46	4.26	3.2	1.37e-11	2.5e-10
chr7	107000185	107000685	*	5.75	6.62	3.2	3.42	1.38e-11	2.51e-10
chr10	13341399	13341899	*	5.7	6.59	2.89	3.7	1.38e-11	2.51e-10
chr4	53524729	53525229	*	5.18	6.16	-0.29	6.45	1.38e-11	2.52e-10
chr1	9658225	9658725	*	5.08	6.07	-0.29	6.36	1.39e-11	2.53e-10
chr9	137624465	137624965	*	5.09	6.07	-0.29	6.36	1.39e-11	2.53e-10
chr2	241708543	241709043	*	5.16	6.14	-0.29	6.44	1.39e-11	2.53e-10
chr1	153674716	153675216	*	5.3	6.22	2.16	4.06	1.42e-11	2.58e-10
chr7	2416400	2416900	*	8.01	8.86	5.67	3.19	1.42e-11	2.58e-10
chr7	417208	417708	*	6.54	7.43	3.69	3.75	1.43e-11	2.6e-10
chr11	134269436	134269936	*	5.63	6.51	2.97	3.53	1.44e-11	2.6e-10
chr17	61622487	61622987	*	6.82	7.74	3.67	4.07	1.45e-11	2.62e-10
chr1	44478254	44478754	*	5.27	6.21	1.66	4.55	1.46e-11	2.64e-10
chr15	40600192	40600692	*	5.11	6.09	-0.29	6.39	1.46e-11	2.64e-10
chr10	88415008	88415508	*	5.53	6.4	2.93	3.47	1.46e-11	2.65e-10
chr22	25817035	25817535	*	5.36	6.29	1.98	4.31	1.5e-11	2.71e-10
chr1	226078097	226078597	*	4.95	5.88	1.71	4.17	1.5e-11	2.71e-10
chr16	28619394	28619894	*	5.1	6.05	1.47	4.58	1.5e-11	2.71e-10
chr9	137144883	137145383	*	5.44	6.35	2.42	3.92	1.52e-11	2.74e-10
chr17	61590800	61591300	*	5.16	6.14	-0.29	6.43	1.53e-11	2.76e-10
chr9	137350879	137351379	*	7.14	7.94	5.18	2.77	1.53e-11	2.76e-10
chr6	158126049	158126549	*	5.62	6.53	2.65	3.88	1.53e-11	2.76e-10
chr1	227729919	227730419	*	8.15	8.97	6.04	2.93	1.56e-11	2.81e-10
chr19	1224719	1225219	*	6.44	7.33	3.62	3.71	1.56e-11	2.81e-10
chr11	66016397	66016897	*	5.34	6.23	2.52	3.71	1.58e-11	2.84e-10
chr8	143676555	143677055	*	5.82	6.73	2.78	3.95	1.58e-11	2.84e-10
chr1	155717862	155718362	*	4.88	5.85	0.08	5.77	1.59e-11	2.85e-10
chr22	50966661	50967161	*	6.24	7.15	3.16	3.99	1.59e-11	2.85e-10
chr22	28402582	28403082	*	5.71	6.63	2.34	4.3	1.6e-11	2.87e-10
chr16	3065769	3066269	*	6.43	7.28	4.09	3.18	1.6e-11	2.87e-10
chr17	80061585	80062085	*	7.41	8.21	5.46	2.75	1.61e-11	2.89e-10
chr17	76244655	76245155	*	7.87	8.68	5.84	2.84	1.62e-11	2.9e-10
chr11	68584981	68585481	*	8.76	9.57	6.7	2.87	1.63e-11	2.91e-10
chr11	66116406	66116906	*	5.08	6.06	-0.29	6.35	1.63e-11	2.92e-10
chr14	105039798	105040298	*	5.69	6.57	3.08	3.49	1.63e-11	2.92e-10
chr5	179232872	179233372	*	4.88	5.83	1.04	4.79	1.64e-11	2.92e-10
chr11	63980915	63981415	*	4.89	5.84	1.1	4.74	1.64e-11	2.92e-10
chr18	74897732	74898232	*	5.93	6.78	3.53	3.25	1.64e-11	2.92e-10
chr22	20121501	20122001	*	5.21	6.15	1.69	4.46	1.65e-11	2.93e-10
chr16	630539	631039	*	5.2	6.18	-0.29	6.48	1.65e-11	2.93e-10
chr19	13702281	13702781	*	6.34	7.18	4.05	3.13	1.67e-11	2.98e-10
chr19	18714223	18714723	*	6.51	7.41	3.69	3.72	1.68e-11	2.99e-10
chr5	137780748	137781248	*	7.36	8.19	5.19	3	1.69e-11	3e-10
chr9	96024726	96025226	*	5.55	6.45	2.65	3.8	1.69e-11	3e-10
chr21	40685768	40686268	*	5.68	6.54	3.17	3.37	1.69e-11	3e-10
chr19	15490769	15491269	*	5.23	6.22	-0.29	6.51	1.69e-11	3.01e-10
chr5	131562868	131563368	*	7.26	8.05	5.33	2.72	1.7e-11	3.02e-10
chr15	42264078	42264578	*	5.49	6.4	2.4	4	1.71e-11	3.04e-10
chr7	104924371	104924871	*	4.86	5.82	0.83	4.98	1.74e-11	3.08e-10
chr3	49200399	49200899	*	5.85	6.74	3.19	3.54	1.74e-11	3.08e-10
chr12	121905613	121906113	*	4.97	5.91	1.38	4.53	1.75e-11	3.1e-10
chr7	2577860	2578360	*	5.17	6.15	-0.29	6.44	1.76e-11	3.11e-10
chr11	73019398	73019898	*	6.23	7.05	4.18	2.87	1.77e-11	3.13e-10
chr9	137234334	137234834	*	5.35	6.27	2.18	4.09	1.78e-11	3.14e-10
chr11	17582975	17583475	*	4.86	5.79	1.55	4.23	1.78e-11	3.14e-10
chr17	37243745	37244245	*	4.9	5.85	1.01	4.84	1.78e-11	3.14e-10
chr19	5799805	5800305	*	4.94	5.91	0.57	5.34	1.79e-11	3.16e-10
chr9	129389190	129389690	*	5.42	6.29	2.87	3.41	1.79e-11	3.16e-10
chr1	155149608	155150108	*	4.99	5.96	0.08	5.88	1.8e-11	3.17e-10
chr22	23438088	23438588	*	6.55	7.41	4.16	3.24	1.81e-11	3.19e-10
chr8	145107002	145107502	*	6.54	7.41	4.06	3.35	1.83e-11	3.22e-10
chr14	104159758	104160258	*	6.98	7.83	4.64	3.19	1.84e-11	3.23e-10
chr17	3461560	3462060	*	6.8	7.63	4.6	3.04	1.84e-11	3.23e-10
chr15	66459082	66459582	*	4.92	5.87	0.79	5.09	1.85e-11	3.25e-10
chr17	55520815	55521315	*	6.06	6.89	3.88	3.01	1.85e-11	3.25e-10
chr5	176070538	176071038	*	7.09	7.95	4.63	3.33	1.85e-11	3.25e-10
chr15	42372992	42373492	*	4.88	5.83	1.02	4.81	1.87e-11	3.28e-10
chr11	45928045	45928545	*	5.52	6.44	2.3	4.14	1.88e-11	3.3e-10
chr2	95699777	95700277	*	5.96	6.88	2.71	4.17	1.9e-11	3.32e-10
chr20	39772952	39773452	*	5.07	6.05	-0.29	6.34	1.9e-11	3.33e-10
chr19	3725214	3725714	*	5.2	6.14	1.49	4.65	1.9e-11	3.33e-10
chr17	74020896	74021396	*	6.86	7.7	4.6	3.1	1.9e-11	3.33e-10
chr11	33893310	33893810	*	6.15	7.03	3.55	3.48	1.93e-11	3.37e-10
chr7	5628456	5628956	*	6.46	7.33	3.95	3.38	1.93e-11	3.38e-10
chr17	72824099	72824599	*	4.91	5.86	1.02	4.84	1.95e-11	3.4e-10
chr2	91961058	91961558	*	4.95	5.92	0.08	5.84	1.96e-11	3.41e-10
chr20	61048021	61048521	*	6.45	7.28	4.3	2.98	1.96e-11	3.42e-10
chr20	33136826	33137326	*	4.84	5.78	1.2	4.58	1.96e-11	3.42e-10
chr1	53533144	53533644	*	4.85	5.8	0.79	5.02	1.98e-11	3.44e-10
chr9	114246116	114246616	*	5.81	6.73	2.5	4.23	1.99e-11	3.47e-10
chr16	66640782	66641282	*	6.4	7.25	4.06	3.18	2e-11	3.48e-10
chr17	4709918	4710418	*	4.95	5.9	1.09	4.81	2e-11	3.48e-10
chr1	17556046	17556546	*	4.89	5.83	1.18	4.65	2.02e-11	3.5e-10
chr22	43650315	43650815	*	4.92	5.88	0.63	5.25	2.02e-11	3.51e-10
chr14	104683810	104684310	*	5.06	6.04	-0.29	6.33	2.03e-11	3.52e-10
chr12	113686185	113686685	*	4.92	5.86	1.32	4.53	2.03e-11	3.52e-10
chr19	4706726	4707226	*	6.81	7.69	4.17	3.52	2.03e-11	3.52e-10
chr8	143867039	143867539	*	5.46	6.38	2.17	4.22	2.03e-11	3.52e-10
chr7	98452533	98453033	*	6.77	7.58	4.8	2.77	2.04e-11	3.53e-10
chr19	39888032	39888532	*	4.9	5.86	0.48	5.39	2.04e-11	3.53e-10
chr16	416393	416893	*	5.01	5.95	1.5	4.44	2.07e-11	3.58e-10
chr17	43853952	43854452	*	5.05	6.03	-0.29	6.32	2.08e-11	3.59e-10
chr9	38545648	38546148	*	7.5	8.32	5.37	2.96	2.09e-11	3.6e-10
chr17	1540070	1540570	*	5.08	6.06	-0.29	6.35	2.09e-11	3.6e-10
chr1	200977131	200977631	*	5.06	6.04	-0.29	6.33	2.1e-11	3.62e-10
chr20	57875627	57876127	*	6.7	7.52	4.59	2.93	2.1e-11	3.63e-10
chr9	124535972	124536472	*	4.92	5.88	0.83	5.05	2.13e-11	3.66e-10
chr3	184074952	184075452	*	6.18	7.01	4.03	2.98	2.13e-11	3.67e-10
chr1	3393972	3394472	*	4.89	5.83	1.18	4.65	2.14e-11	3.69e-10
chr5	177765328	177765828	*	5.08	6.06	-0.29	6.35	2.15e-11	3.7e-10
chr17	78925458	78925958	*	6.47	7.37	3.46	3.91	2.15e-11	3.7e-10
chr17	78805311	78805811	*	6.67	7.56	3.92	3.64	2.15e-11	3.7e-10
chr22	23152612	23153112	*	5.16	6.15	-0.29	6.44	2.17e-11	3.72e-10
chr12	57915862	57916362	*	5.62	6.53	2.58	3.95	2.2e-11	3.77e-10
chr1	3044885	3045385	*	5.61	6.52	2.59	3.92	2.2e-11	3.77e-10
chr22	46818773	46819273	*	6.23	7.05	4.12	2.93	2.21e-11	3.79e-10
chr12	123475289	123475789	*	5.43	6.32	2.74	3.58	2.22e-11	3.8e-10
chr20	62669724	62670224	*	5.76	6.63	3.26	3.37	2.23e-11	3.82e-10
chr17	79770478	79770978	*	7.17	8	5.02	2.98	2.25e-11	3.85e-10
chr20	46368874	46369374	*	4.79	5.75	0.62	5.13	2.26e-11	3.87e-10
chr1	151512980	151513480	*	5.49	6.4	2.45	3.95	2.27e-11	3.89e-10
chr14	95968100	95968600	*	5.55	6.47	2.31	4.16	2.28e-11	3.89e-10
chr5	652200	652700	*	5.63	6.5	3.08	3.42	2.28e-11	3.89e-10
chr7	98580228	98580728	*	4.98	5.93	1.23	4.69	2.28e-11	3.9e-10
chr22	38840288	38840788	*	5.05	6.04	-0.29	6.33	2.29e-11	3.91e-10
chr10	5662038	5662538	*	5.14	6.07	1.86	4.21	2.31e-11	3.94e-10
chr12	132974740	132975240	*	5.08	6.06	-0.29	6.35	2.33e-11	3.96e-10
chr19	18559249	18559749	*	4.78	5.72	1.18	4.54	2.33e-11	3.96e-10
chr16	4847355	4847855	*	5.5	6.37	2.95	3.42	2.33e-11	3.97e-10
chr22	44834278	44834778	*	5.39	6.25	2.93	3.32	2.34e-11	3.98e-10
chr11	113888468	113888968	*	4.91	5.86	1.01	4.85	2.35e-11	3.99e-10
chr7	65542736	65543236	*	5.07	6	1.61	4.39	2.36e-11	4e-10
chr10	134911431	134911931	*	6.22	7.07	3.85	3.22	2.36e-11	4.02e-10
chr1	156369895	156370395	*	6.13	6.94	4.08	2.86	2.37e-11	4.03e-10
chr3	52398834	52399334	*	5.32	6.24	2.26	3.97	2.37e-11	4.03e-10
chr19	45348774	45349274	*	5.04	6.02	-0.29	6.31	2.38e-11	4.03e-10
chr19	2438370	2438870	*	5.7	6.62	2.61	4	2.39e-11	4.05e-10
chr1	18956048	18956548	*	7.14	7.96	5.04	2.92	2.4e-11	4.06e-10
chr3	126727541	126728041	*	5.05	6.03	-0.29	6.33	2.41e-11	4.07e-10
chr16	69966434	69966934	*	5.42	6.33	2.44	3.89	2.41e-11	4.08e-10
chr16	3531506	3532006	*	6.2	7.04	3.94	3.1	2.43e-11	4.1e-10
chr7	44264557	44265057	*	6.14	6.97	3.97	3.01	2.43e-11	4.11e-10
chr10	134903989	134904489	*	7.38	8.26	4.7	3.57	2.46e-11	4.15e-10
chr2	10918331	10918831	*	7.48	8.33	5.16	3.17	2.47e-11	4.18e-10
chr12	108053746	108054246	*	6.37	7.17	4.42	2.75	2.48e-11	4.19e-10
chr4	680400	680900	*	7.55	8.38	5.39	2.99	2.5e-11	4.21e-10
chr8	143820623	143821123	*	4.94	5.91	0.38	5.53	2.51e-11	4.23e-10
chr19	7953361	7953861	*	6	6.88	3.44	3.44	2.54e-11	4.27e-10
chr1	202611022	202611522	*	4.87	5.84	0.08	5.76	2.56e-11	4.31e-10
chr22	43517993	43518493	*	4.93	5.87	1.18	4.69	2.57e-11	4.33e-10
chr7	101821135	101821635	*	4.84	5.81	0.08	5.73	2.59e-11	4.35e-10
chr14	50066162	50066662	*	5.04	5.99	1.08	4.91	2.61e-11	4.39e-10
chr14	106199703	106200203	*	6.07	6.89	4.02	2.86	2.61e-11	4.39e-10
chr10	100131095	100131595	*	4.92	5.85	1.52	4.33	2.62e-11	4.4e-10
chr16	85511319	85511819	*	4.83	5.78	1.04	4.74	2.63e-11	4.41e-10
chr22	22006611	22007111	*	5.36	6.28	2.15	4.13	2.64e-11	4.42e-10
chr1	227167497	227167997	*	5.41	6.29	2.78	3.5	2.64e-11	4.42e-10
chr12	8032417	8032917	*	6.22	7.14	3.15	3.98	2.65e-11	4.44e-10
chr9	140120038	140120538	*	4.88	5.85	0.63	5.22	2.65e-11	4.44e-10
chr22	19460840	19461340	*	5.54	6.42	2.86	3.56	2.66e-11	4.45e-10
chr10	70593124	70593624	*	5.6	6.47	3.08	3.39	2.68e-11	4.48e-10
chr14	105182333	105182833	*	5.05	6.03	-0.29	6.32	2.72e-11	4.54e-10
chr8	142383368	142383868	*	5.02	5.94	1.69	4.25	2.73e-11	4.56e-10
chr10	8198781	8199281	*	6.56	7.45	3.88	3.56	2.74e-11	4.57e-10
chr9	139222514	139223014	*	5.36	6.27	2.23	4.04	2.75e-11	4.6e-10
chr5	315785	316285	*	4.91	5.84	1.47	4.36	2.78e-11	4.64e-10
chr16	12144640	12145140	*	5.08	6	1.82	4.18	2.79e-11	4.64e-10
chr20	36764172	36764672	*	5.3	6.22	2.05	4.18	2.79e-11	4.65e-10
chr22	49575569	49576069	*	5.02	5.96	1.31	4.65	2.81e-11	4.67e-10
chr1	6302307	6302807	*	6.4	7.27	3.82	3.45	2.83e-11	4.7e-10
chr7	39663476	39663976	*	7.8	8.63	5.62	3.01	2.84e-11	4.71e-10
chr9	33598076	33598576	*	8.39	9.2	6.3	2.9	2.84e-11	4.72e-10
chr11	113158948	113159448	*	5.6	6.47	3.05	3.42	2.91e-11	4.83e-10
chr14	103234476	103234976	*	4.88	5.85	0.2	5.65	2.93e-11	4.86e-10
chr20	957754	958254	*	6.44	7.27	4.24	3.04	2.93e-11	4.87e-10
chr1	16817500	16818000	*	5.25	6.13	2.62	3.51	2.94e-11	4.87e-10
chr17	79403568	79404068	*	6.2	7.03	4.01	3.02	2.95e-11	4.9e-10
chr1	22157726	22158226	*	5.02	6.01	-0.29	6.3	2.97e-11	4.92e-10
chr3	50685052	50685552	*	5.18	6.17	-0.29	6.46	2.97e-11	4.92e-10
chr7	157577077	157577577	*	5.18	6.16	-0.29	6.45	2.98e-11	4.93e-10
chr7	1639590	1640090	*	5.57	6.45	2.96	3.49	2.99e-11	4.94e-10
chr16	11878647	11879147	*	4.96	5.89	1.57	4.32	2.99e-11	4.94e-10
chr1	208202283	208202783	*	5.44	6.38	1.98	4.4	3.01e-11	4.97e-10
chr19	45410650	45411150	*	4.99	5.97	-0.29	6.26	3.02e-11	4.99e-10
chr12	56274328	56274828	*	5.37	6.28	2.33	3.95	3.05e-11	5.02e-10
chr2	71691544	71692044	*	6.76	7.61	4.42	3.19	3.05e-11	5.04e-10
chr2	74588368	74588868	*	5.66	6.6	2.06	4.54	3.06e-11	5.04e-10
chr20	55667442	55667942	*	5.17	6.1	1.69	4.42	3.07e-11	5.06e-10
chr1	201417295	201417795	*	7.32	8.12	5.39	2.73	3.07e-11	5.06e-10
chr20	32289599	32290099	*	5.58	6.44	3.09	3.35	3.08e-11	5.06e-10
chr11	116703153	116703653	*	6.22	7.09	3.69	3.39	3.09e-11	5.08e-10
chr14	105434200	105434700	*	5.56	6.46	2.68	3.78	3.1e-11	5.1e-10
chr16	28328691	28329191	*	8.05	8.87	5.93	2.95	3.1e-11	5.1e-10
chr22	50584858	50585358	*	4.95	5.89	1.31	4.58	3.16e-11	5.19e-10
chr17	48877259	48877759	*	5.02	6	-0.29	6.29	3.16e-11	5.19e-10
chr10	72572120	72572620	*	5.19	6.1	2.07	4.03	3.17e-11	5.21e-10
chr17	73030478	73030978	*	5.34	6.21	2.83	3.38	3.18e-11	5.21e-10
chr22	51064285	51064785	*	5.02	6	-0.29	6.29	3.19e-11	5.22e-10
chr5	150460283	150460783	*	5.46	6.36	2.62	3.74	3.2e-11	5.24e-10
chr16	2880466	2880966	*	4.88	5.81	1.5	4.31	3.21e-11	5.26e-10
chr22	23657427	23657927	*	4.86	5.81	1.1	4.7	3.24e-11	5.29e-10
chr7	826211	826711	*	5.03	6.01	-0.29	6.3	3.25e-11	5.32e-10
chr19	2645332	2645832	*	5.14	6.04	2.21	3.84	3.26e-11	5.32e-10
chr17	71468317	71468817	*	4.91	5.83	1.73	4.1	3.27e-11	5.34e-10
chr21	44410818	44411318	*	5.03	5.93	2.08	3.85	3.27e-11	5.34e-10
chr19	47479621	47480121	*	5.19	6.17	-0.29	6.46	3.28e-11	5.34e-10
chrX	68294567	68295067	*	5.79	6.64	3.51	3.13	3.29e-11	5.36e-10
chr17	38267710	38268210	*	5.5	6.38	2.82	3.56	3.31e-11	5.39e-10
chr21	47357473	47357973	*	4.75	5.7	0.97	4.72	3.32e-11	5.41e-10
chr16	30997231	30997731	*	6	6.88	3.38	3.5	3.32e-11	5.41e-10
chr22	46858906	46859406	*	5.31	6.25	1.79	4.46	3.33e-11	5.42e-10
chr10	71623133	71623633	*	4.82	5.79	0.08	5.71	3.33e-11	5.42e-10
chr9	136517051	136517551	*	5.04	6.03	-0.29	6.32	3.35e-11	5.44e-10
chr19	2298695	2299195	*	5.56	6.47	2.64	3.83	3.39e-11	5.5e-10
chr18	19215587	19216087	*	5.01	5.91	2.13	3.77	3.43e-11	5.56e-10
chr17	71336030	71336530	*	4.77	5.72	0.83	4.89	3.46e-11	5.61e-10
chr15	78498536	78499036	*	6.29	7.12	4.14	2.98	3.46e-11	5.61e-10
chr10	132947043	132947543	*	6.3	7.12	4.22	2.9	3.47e-11	5.62e-10
chr1	204955138	204955638	*	5.08	6.03	1.45	4.57	3.48e-11	5.64e-10
chr1	227978899	227979399	*	8.79	9.62	6.59	3.04	3.52e-11	5.69e-10
chr17	19647871	19648371	*	4.97	5.95	-0.29	6.25	3.56e-11	5.77e-10
chr22	29450166	29450666	*	5.09	6	1.98	4.02	3.57e-11	5.77e-10
chr22	50835427	50835927	*	5.8	6.63	3.62	3.01	3.58e-11	5.79e-10
chr2	10972701	10973201	*	4.94	5.85	2	3.85	3.58e-11	5.79e-10
chr2	241446738	241447238	*	8.06	8.9	5.77	3.13	3.58e-11	5.79e-10
chr5	132583748	132584248	*	7.65	8.45	5.71	2.74	3.62e-11	5.83e-10
chr19	18627367	18627867	*	4.96	5.91	1.1	4.8	3.63e-11	5.85e-10
chr12	110518118	110518618	*	4.79	5.74	0.83	4.91	3.66e-11	5.9e-10
chr18	77387490	77387990	*	5.95	6.77	3.81	2.96	3.67e-11	5.92e-10
chr20	34737403	34737903	*	5.31	6.19	2.62	3.57	3.68e-11	5.93e-10
chr9	95971334	95971834	*	5.33	6.23	2.45	3.78	3.69e-11	5.93e-10
chr1	110168718	110169218	*	5.39	6.31	2.1	4.22	3.69e-11	5.94e-10
chr6	168526202	168526702	*	5.01	5.92	2.05	3.87	3.7e-11	5.95e-10
chr17	1655763	1656263	*	4.96	5.9	1.33	4.57	3.75e-11	6.02e-10
chr22	31276830	31277330	*	4.95	5.9	1.01	4.89	3.75e-11	6.02e-10
chr15	42168941	42169441	*	5.63	6.54	2.53	4.01	3.78e-11	6.06e-10
chr7	407024	407524	*	5.42	6.33	2.37	3.97	3.78e-11	6.06e-10
chr17	81059178	81059678	*	5.07	6	1.8	4.2	3.78e-11	6.06e-10
chr19	51512364	51512864	*	6.32	7.19	3.79	3.41	3.8e-11	6.08e-10
chr17	16838691	16839191	*	6.94	7.82	4.36	3.46	3.8e-11	6.09e-10
chr19	5032193	5032693	*	6.16	7.03	3.56	3.48	3.82e-11	6.11e-10
chr3	48460478	48460978	*	7.54	8.32	5.74	2.58	3.82e-11	6.12e-10
chr17	62044497	62044997	*	4.96	5.94	-0.29	6.24	3.82e-11	6.12e-10
chr1	45285106	45285606	*	4.87	5.82	0.84	4.98	3.86e-11	6.17e-10
chr22	39153893	39154393	*	6.87	7.67	4.93	2.74	3.91e-11	6.25e-10
chr1	2824278	2824778	*	5.07	5.99	1.89	4.11	3.93e-11	6.27e-10
chr19	38473295	38473795	*	5.11	6.01	2.17	3.84	3.93e-11	6.27e-10
chr9	131706995	131707495	*	4.97	5.91	1.32	4.58	3.93e-11	6.27e-10
chr7	158237973	158238473	*	5.82	6.68	3.44	3.24	3.95e-11	6.3e-10
chr11	70416225	70416725	*	5.16	6.11	1.18	4.94	3.97e-11	6.33e-10
chr1	65210784	65211284	*	4.9	5.83	1.46	4.38	3.97e-11	6.33e-10
chr2	233793318	233793818	*	6.83	7.74	3.88	3.86	4e-11	6.37e-10
chr19	3555759	3556259	*	6.02	6.88	3.64	3.24	4.02e-11	6.39e-10
chr8	27532634	27533134	*	6.2	7.03	4.05	2.98	4.06e-11	6.46e-10
chr7	153585166	153585666	*	5.51	6.38	2.94	3.44	4.09e-11	6.5e-10
chr12	6424036	6424536	*	5.16	6.08	2.01	4.07	4.1e-11	6.51e-10
chr12	50263389	50263889	*	4.82	5.75	1.52	4.22	4.1e-11	6.51e-10
chr14	106048874	106049374	*	6.01	6.91	3.04	3.87	4.1e-11	6.51e-10
chr22	20175192	20175692	*	5	5.94	1.45	4.48	4.12e-11	6.54e-10
chr19	13256441	13256941	*	5.04	5.96	1.93	4.02	4.13e-11	6.54e-10
chr12	680874	681374	*	7.78	8.59	5.7	2.89	4.13e-11	6.54e-10
chr3	125987562	125988062	*	5.44	6.36	2.13	4.24	4.14e-11	6.55e-10
chr3	148847187	148847687	*	4.83	5.8	0.08	5.72	4.14e-11	6.55e-10
chr22	30657406	30657906	*	4.79	5.76	0.08	5.68	4.16e-11	6.58e-10
chr2	219261668	219262168	*	5.33	6.22	2.54	3.68	4.17e-11	6.6e-10
chr11	76837389	76837889	*	5.34	6.23	2.58	3.64	4.19e-11	6.61e-10
chr17	71427649	71428149	*	5.39	6.3	2.43	3.86	4.2e-11	6.63e-10
chr18	76625745	76626245	*	6.72	7.59	4.17	3.42	4.21e-11	6.65e-10
chr3	48605588	48606088	*	6.2	7.08	3.58	3.5	4.22e-11	6.66e-10
chr14	100086443	100086943	*	5.27	6.21	1.79	4.41	4.26e-11	6.71e-10
chr4	187112342	187112842	*	5.55	6.45	2.59	3.86	4.26e-11	6.72e-10
chr6	33263571	33264071	*	5.01	5.94	1.47	4.48	4.35e-11	6.85e-10
chr19	1323024	1323524	*	5.05	5.98	1.8	4.18	4.37e-11	6.87e-10
chr15	74218704	74219204	*	6.09	6.96	3.58	3.38	4.42e-11	6.96e-10
chr14	105612480	105612980	*	6.75	7.63	4.04	3.59	4.43e-11	6.96e-10
chr11	70608611	70609111	*	5.03	5.95	1.8	4.15	4.43e-11	6.96e-10
chr2	95715388	95715888	*	4.96	5.9	1.19	4.72	4.45e-11	7e-10
chr7	535323	535823	*	4.75	5.71	0.38	5.34	4.46e-11	7e-10
chr17	42608793	42609293	*	5.51	6.35	3.18	3.18	4.48e-11	7.03e-10
chr1	1238270	1238770	*	4.9	5.87	0.08	5.79	4.5e-11	7.05e-10
chr19	5877505	5878005	*	4.74	5.7	0.57	5.13	4.52e-11	7.08e-10
chr11	117699610	117700110	*	6.25	7.15	3.4	3.74	4.55e-11	7.12e-10
chr12	131479254	131479754	*	5.13	6.11	-0.29	6.4	4.57e-11	7.15e-10
chr17	42290314	42290814	*	4.75	5.71	0.57	5.14	4.58e-11	7.17e-10
chr12	124882028	124882528	*	5.62	6.49	3.13	3.35	4.62e-11	7.23e-10
chr11	62313793	62314293	*	6.64	7.5	4.22	3.28	4.63e-11	7.23e-10
chr11	16824395	16824895	*	4.81	5.76	1.1	4.65	4.68e-11	7.32e-10
chr17	39902434	39902934	*	5.22	6.1	2.53	3.57	4.72e-11	7.37e-10
chr5	10653325	10653825	*	6.62	7.52	3.72	3.8	4.72e-11	7.37e-10
chr17	79701391	79701891	*	5.4	6.28	2.83	3.44	4.75e-11	7.4e-10
chr8	143569689	143570189	*	5.83	6.67	3.58	3.09	4.75e-11	7.41e-10
chr11	133787255	133787755	*	5.34	6.25	2.38	3.86	4.77e-11	7.44e-10
chr19	8397123	8397623	*	4.95	5.93	-0.29	6.22	4.78e-11	7.44e-10
chr16	2054377	2054877	*	4.99	5.97	-0.29	6.26	4.78e-11	7.44e-10
chr18	77454099	77454599	*	5.09	6.01	1.74	4.27	4.8e-11	7.47e-10
chr20	48873160	48873660	*	6.28	7.13	3.88	3.26	4.8e-11	7.47e-10
chr19	18851143	18851643	*	6.23	7.07	4.02	3.04	4.81e-11	7.47e-10
chr2	97167512	97168012	*	7.3	8.16	4.81	3.36	4.82e-11	7.48e-10
chr20	57917917	57918417	*	4.84	5.79	1.01	4.78	4.82e-11	7.48e-10
chr14	69289362	69289862	*	6.02	6.91	3.26	3.64	4.86e-11	7.54e-10
chr2	241795051	241795551	*	4.8	5.74	1.18	4.56	4.86e-11	7.54e-10
chr19	50218986	50219486	*	5.97	6.81	3.72	3.09	4.91e-11	7.61e-10
chr4	7973161	7973661	*	5.47	6.4	2.05	4.34	4.91e-11	7.61e-10
chr20	55733491	55733991	*	7.29	8.09	5.31	2.78	4.92e-11	7.63e-10
chr11	49913786	49914286	*	4.93	5.91	-0.29	6.2	4.93e-11	7.63e-10
chr10	73641272	73641772	*	5.82	6.72	2.96	3.77	4.96e-11	7.67e-10
chr8	143024445	143024945	*	5.73	6.64	2.76	3.88	4.96e-11	7.67e-10
chr17	73504519	73505019	*	8.62	9.41	6.77	2.64	5e-11	7.73e-10
chr16	1276016	1276516	*	4.88	5.83	0.86	4.97	5.01e-11	7.74e-10
chr2	239331911	239332411	*	4.94	5.89	1.19	4.7	5.01e-11	7.74e-10
chr4	1562162	1562662	*	4.94	5.92	-0.29	6.21	5.01e-11	7.74e-10
chr10	73821708	73822208	*	5	5.98	-0.29	6.27	5.02e-11	7.75e-10
chr20	897570	898070	*	4.92	5.85	1.57	4.28	5.04e-11	7.78e-10
chr1	45156432	45156932	*	4.94	5.92	-0.29	6.21	5.08e-11	7.83e-10
chr19	47620707	47621207	*	5.29	6.18	2.58	3.59	5.12e-11	7.89e-10
chr20	62855330	62855830	*	5.1	5.99	2.35	3.63	5.23e-11	8.05e-10
chr11	61816997	61817497	*	5.53	6.38	3.2	3.18	5.24e-11	8.06e-10
chr17	70345415	70345915	*	5.9	6.77	3.26	3.51	5.24e-11	8.06e-10
chr10	42725721	42726221	*	7.83	8.63	5.89	2.74	5.28e-11	8.11e-10
chr1	26191690	26192190	*	5.24	6.15	2.22	3.94	5.29e-11	8.13e-10
chr12	49436801	49437301	*	5.46	6.36	2.53	3.83	5.3e-11	8.13e-10
chr20	62603729	62604229	*	6.05	6.9	3.79	3.1	5.42e-11	8.32e-10
chr14	105269762	105270262	*	4.97	5.95	-0.29	6.24	5.44e-11	8.34e-10
chr3	9971365	9971865	*	4.88	5.82	1.18	4.65	5.5e-11	8.44e-10
chr12	6472894	6473394	*	5.03	5.96	1.7	4.26	5.51e-11	8.45e-10
chr22	21261642	21262142	*	4.78	5.74	0.63	5.11	5.53e-11	8.48e-10
chr1	9213152	9213652	*	5.42	6.29	2.94	3.34	5.57e-11	8.52e-10
chr12	2042889	2043389	*	6.24	7.05	4.24	2.81	5.58e-11	8.54e-10
chr2	208031006	208031506	*	5.96	6.85	3.19	3.66	5.59e-11	8.54e-10
chr11	2444976	2445476	*	5.23	6.11	2.53	3.58	5.61e-11	8.57e-10
chr19	4539779	4540279	*	5.18	6.09	2.06	4.03	5.63e-11	8.6e-10
chr9	35657263	35657763	*	4.94	5.92	-0.29	6.21	5.65e-11	8.61e-10
chr12	12414798	12415298	*	4.74	5.7	0.38	5.32	5.65e-11	8.61e-10
chr17	17255111	17255611	*	6.45	7.32	3.98	3.34	5.65e-11	8.61e-10
chr3	46939327	46939827	*	5.28	6.18	2.32	3.86	5.65e-11	8.62e-10
chr6	166274087	166274587	*	4.71	5.67	0.48	5.19	5.66e-11	8.62e-10
chr10	1599190	1599690	*	5.07	5.99	1.82	4.17	5.69e-11	8.66e-10
chr16	28601911	28602411	*	5.59	6.49	2.74	3.75	5.69e-11	8.67e-10
chr1	95314338	95314838	*	5.26	6.17	2.25	3.92	5.74e-11	8.74e-10
chr22	49852303	49852803	*	5.56	6.47	2.46	4.01	5.78e-11	8.78e-10
chr18	12090559	12091059	*	6.6	7.42	4.52	2.91	5.78e-11	8.79e-10
chr22	25240574	25241074	*	7.12	7.94	5.05	2.89	5.79e-11	8.79e-10
chr8	48771630	48772130	*	5.61	6.48	3.06	3.42	5.79e-11	8.79e-10
chr19	48806768	48807268	*	4.93	5.91	-0.29	6.21	5.86e-11	8.89e-10
chr9	35792666	35793166	*	5.42	6.31	2.57	3.74	5.86e-11	8.89e-10
chr10	120610699	120611199	*	6.38	7.19	4.42	2.77	5.88e-11	8.92e-10
chr14	67919704	67920204	*	6.98	7.8	4.86	2.94	5.9e-11	8.93e-10
chr7	97843375	97843875	*	7.9	8.78	5.24	3.53	5.9e-11	8.93e-10
chr19	4351343	4351843	*	4.93	5.91	-0.29	6.2	5.9e-11	8.94e-10
chr1	25233840	25234340	*	6.25	7.07	4.1	2.97	5.91e-11	8.94e-10
chr16	615034	615534	*	5.32	6.25	1.89	4.37	5.91e-11	8.94e-10
chr1	46570747	46571247	*	6.36	7.21	4.01	3.2	5.94e-11	8.97e-10
chr4	2336915	2337415	*	6.51	7.38	4	3.37	5.95e-11	8.98e-10
chr7	372947	373447	*	4.76	5.7	1.2	4.49	5.95e-11	8.98e-10
chr16	88620800	88621300	*	4.96	5.95	-0.29	6.24	5.98e-11	9.03e-10
chr11	47381568	47382068	*	4.76	5.72	0.38	5.35	6.01e-11	9.06e-10
[truncated: 28,159 more rows]

## Sheet: 17α-E2(10nM) vs 17α-E2(100nM) 
seqnames	start	end	strand	Conc	Conc_17a_10nm	Conc_17a_100nm	Fold	p.value	FDR
chr10	11805139	11805639	*	4.42	2.66	5.19	-2.53	0.000716	1
chr19	1147636	1148136	*	4.54	3.56	5.12	-1.56	0.00585	1
chr19	27736171	27736671	*	3.13	0.07	4.04	-3.97	0.00646	1
chr17	63476408	63476908	*	3.57	4.37	1.66	2.7	0.00652	1
chr15	40587224	40587724	*	3.53	1.74	4.31	-2.57	0.00698	1
chr20	33850507	33851007	*	3.02	1.07	3.82	-2.76	0.00722	1
chr8	103741029	103741529	*	4.87	3.94	5.44	-1.5	0.00911	1
chr10	42532539	42533039	*	4.65	3.74	5.2	-1.46	0.0106	1
chr19	16126936	16127436	*	4.31	3.1	4.95	-1.85	0.0113	1
chr5	6491718	6492218	*	4.19	3.05	4.82	-1.77	0.0114	1
chr5	352762	353262	*	5.16	4.12	5.76	-1.64	0.0132	1
chr11	72285764	72286264	*	2.31	-0.37	3.2	-3.57	0.0145	1
chr16	1768202	1768702	*	3.76	2.25	4.48	-2.23	0.015	1
chr20	47452626	47453126	*	4.78	3.92	5.32	-1.39	0.0155	1
chr1	201986576	201987076	*	4.82	3.8	5.41	-1.62	0.0155	1
chr20	24771157	24771657	*	4.42	3.52	4.97	-1.45	0.0157	1
chr20	61945456	61945956	*	4.94	4.18	5.44	-1.26	0.0158	1
chr7	2528253	2528753	*	4.72	3.69	5.32	-1.64	0.0166	1
chr2	241906414	241906914	*	4.84	4.01	5.37	-1.36	0.0175	1
chr6	10704166	10704666	*	2.2	-0.37	3.08	-3.45	0.0195	1
chr22	48972312	48972812	*	4.72	3.85	5.26	-1.41	0.0204	1
chr4	3778069	3778569	*	5.03	4.33	5.5	-1.17	0.0208	1
chr22	47000752	47001252	*	3.08	1.22	3.87	-2.64	0.0208	1
chr1	47855881	47856381	*	2.89	0.92	3.69	-2.78	0.0218	1
chr10	103402938	103403438	*	4.2	3.27	4.76	-1.49	0.0223	1
chr16	83885706	83886206	*	4.55	3.7	5.08	-1.38	0.023	1
chr10	30454316	30454816	*	4.65	5.16	3.87	1.29	0.0232	1
chr1	181501352	181501852	*	4.48	5.05	3.54	1.5	0.0233	1
chr22	47019271	47019771	*	5.35	4.62	5.83	-1.22	0.0237	1
chr9	139012692	139013192	*	5.03	4.36	5.49	-1.13	0.024	1
chr14	68943092	68943592	*	4.97	5.51	4.11	1.39	0.0253	1
chr1	28902876	28903376	*	5.1	4.46	5.53	-1.07	0.0264	1
chr10	134612910	134613410	*	5.02	4.37	5.46	-1.09	0.0265	1
chr6	152850388	152850888	*	4.94	5.47	4.08	1.39	0.0265	1
chr20	49228108	49228608	*	4.85	4	5.39	-1.39	0.0266	1
chr22	23802024	23802524	*	4.24	3.33	4.79	-1.46	0.0286	1
chr4	10035234	10035734	*	5.43	4.8	5.87	-1.07	0.0287	1
chr16	31504707	31505207	*	3.42	2.05	4.11	-2.06	0.0288	1
chr1	116714137	116714637	*	5.07	4.42	5.51	-1.09	0.0289	1
chr22	23045098	23045598	*	4.29	3.2	4.91	-1.71	0.0289	1
chr5	139067069	139067569	*	4.75	4.07	5.21	-1.14	0.029	1
chr1	110640057	110640557	*	4.22	3.33	4.76	-1.43	0.0292	1
chr3	32936491	32936991	*	4.82	4.07	5.32	-1.25	0.0294	1
chr17	25928307	25928807	*	3.78	4.45	2.52	1.93	0.0297	1
chr22	50479810	50480310	*	5.02	4.38	5.46	-1.09	0.0298	1
chr8	101964704	101965204	*	2.47	0.53	3.27	-2.74	0.0302	1
chr7	138793823	138794323	*	4.6	3.72	5.14	-1.42	0.0306	1
chr20	35471503	35472003	*	3.54	1.96	4.27	-2.31	0.0311	1
chr10	43373520	43374020	*	3.21	1.36	4	-2.64	0.0319	1
chr20	25841765	25842265	*	4.93	4.22	5.41	-1.19	0.0326	1
chr22	23800548	23801048	*	4.54	3.8	5.02	-1.23	0.0328	1
chr2	44494734	44495234	*	4.98	5.47	4.21	1.27	0.0329	1
chr3	52419170	52419670	*	4.31	3.32	4.89	-1.57	0.0336	1
chr8	46844644	46845144	*	1.92	2.75	-0.24	2.99	0.034	1
chr22	24550022	24550522	*	3.89	2.39	4.61	-2.22	0.0342	1
chr19	18624636	18625136	*	2.71	0.9	3.48	-2.58	0.0344	1
chr5	150417377	150417877	*	3.38	4.14	1.7	2.44	0.0353	1
chr3	52387320	52387820	*	6.23	5.72	6.61	-0.89	0.0356	1
chr18	55380741	55381241	*	4.27	3.38	4.82	-1.44	0.0359	1
chr3	140775459	140775959	*	4.39	4.96	3.44	1.51	0.036	1
chr13	113769684	113770184	*	4.87	4.19	5.33	-1.14	0.036	1
chr4	185545481	185545981	*	4.91	4.28	5.34	-1.07	0.0368	1
chr17	18883823	18884323	*	4.72	3.91	5.24	-1.33	0.0379	1
chr20	61665958	61666458	*	5.31	4.66	5.76	-1.09	0.0383	1
chr16	70503789	70504289	*	4.67	3.91	5.16	-1.25	0.0387	1
chr9	130527182	130527682	*	4.95	4.32	5.39	-1.07	0.039	1
chr7	1970707	1971207	*	4	2.9	4.61	-1.71	0.0395	1
chr16	622415	622915	*	4.61	3.87	5.1	-1.22	0.0403	1
chr16	1053630	1054130	*	5.63	5.05	6.04	-0.98	0.0405	1
chr17	9606933	9607433	*	5.07	5.5	4.45	1.05	0.0408	1
chr3	128148168	128148668	*	4.16	3.29	4.69	-1.4	0.0411	1
chr2	97617487	97617987	*	4.26	3.31	4.83	-1.52	0.0413	1
chr7	92293417	92293917	*	4.54	5.03	3.81	1.22	0.0423	1
chr1	32126724	32127224	*	5.25	4.59	5.71	-1.11	0.0427	1
chr14	64613600	64614100	*	3.3	4	1.92	2.08	0.0433	1
chr7	1516281	1516781	*	5.17	4.56	5.6	-1.04	0.0437	1
chr11	79455837	79456337	*	4.68	5.16	3.96	1.2	0.0437	1
chr20	49619155	49619655	*	4.62	3.92	5.09	-1.17	0.0447	1
chr7	44274629	44275129	*	5.41	4.84	5.82	-0.98	0.0449	1
chr19	11877348	11877848	*	4.62	3.92	5.09	-1.17	0.0452	1
chr1	76487370	76487870	*	4.25	3.35	4.8	-1.45	0.0454	1
chr17	77400270	77400770	*	1.8	-0.37	2.63	-3.01	0.046	1
chr22	20840956	20841456	*	3.81	2.86	4.38	-1.52	0.0467	1
chr7	826211	826711	*	5.46	4.87	5.87	-1	0.0467	1
chr11	38702200	38702700	*	3.6	4.24	2.42	1.83	0.0469	1
chr5	171834238	171834738	*	4.64	3.96	5.11	-1.14	0.0473	1
chr5	24365278	24365778	*	4.36	4.95	3.35	1.6	0.0477	1
chr7	1922070	1922570	*	4.42	3.48	4.98	-1.5	0.0481	1
chr1	228557905	228558405	*	5.27	4.66	5.69	-1.03	0.0483	1
chr10	71623133	71623633	*	5.56	4.98	5.97	-0.99	0.0483	1
chr5	131647292	131647792	*	4.85	4.21	5.29	-1.08	0.0487	1
chr8	99191409	99191909	*	3.47	4.21	1.87	2.34	0.0488	1
chr8	142731856	142732356	*	3.85	2.71	4.48	-1.77	0.049	1
chr12	11450449	11450949	*	1.76	-0.37	2.59	-2.96	0.0499	1
chr12	125432120	125432620	*	4.75	4.01	5.23	-1.22	0.05	1
chr14	65146854	65147354	*	4.38	4.99	3.31	1.68	0.0503	1
chr3	50543188	50543688	*	4.9	4.23	5.35	-1.13	0.0506	1
chr17	39221812	39222312	*	3.57	2.38	4.21	-1.83	0.0506	1
chr4	191003264	191003764	*	1.76	2.57	-0.24	2.8	0.0509	1
chr18	14020543	14021043	*	5.05	4.41	5.49	-1.08	0.0511	1
chr16	3228544	3229044	*	4.38	3.67	4.85	-1.18	0.0512	1
chr1	22180979	22181479	*	4.82	4.2	5.26	-1.06	0.0522	1
chr6	159132711	159133211	*	3.36	2.1	4.03	-1.93	0.0531	1
chr7	72772890	72773390	*	4.14	3.17	4.71	-1.54	0.0531	1
chr1	11982505	11983005	*	5.03	4.3	5.52	-1.22	0.0532	1
chr22	23271745	23272245	*	5.37	4.73	5.82	-1.09	0.0533	1
chr14	106109664	106110164	*	4.11	3.23	4.66	-1.43	0.0535	1
chr11	44323344	44323844	*	3.6	4.26	2.37	1.89	0.0537	1
chr1	95134370	95134870	*	4	3.14	4.54	-1.4	0.0537	1
chr22	38427448	38427948	*	2.62	3.38	0.91	2.47	0.0538	1
chr10	134265651	134266151	*	5.43	4.9	5.81	-0.92	0.0539	1
chr16	2550467	2550967	*	4.2	3.32	4.75	-1.43	0.054	1
chr5	693466	693966	*	1.64	-0.37	2.45	-2.83	0.0541	1
chr10	123423907	123424407	*	4.18	4.71	3.34	1.37	0.0544	1
chr8	67566426	67566926	*	5.25	4.67	5.66	-0.98	0.0546	1
chr1	17863694	17864194	*	3.98	2.94	4.57	-1.64	0.0549	1
chr3	20896717	20897217	*	4.55	3.91	4.98	-1.07	0.0553	1
chr5	912401	912901	*	4.53	3.67	5.07	-1.4	0.0553	1
chr17	81083278	81083778	*	4.44	3.79	4.89	-1.1	0.0555	1
chr7	158883122	158883622	*	2.51	0.99	3.23	-2.24	0.0561	1
chr2	109914059	109914559	*	4.62	3.92	5.08	-1.16	0.0561	1
chr5	180229497	180229997	*	6.12	5.63	6.48	-0.84	0.0563	1
chr21	45558520	45559020	*	6.14	5.62	6.52	-0.91	0.0563	1
chrX	106926622	106927122	*	4.3	4.83	3.44	1.4	0.0566	1
chr1	985664	986164	*	6.7	6.22	7.05	-0.83	0.0566	1
chr20	58019014	58019514	*	4.81	3.97	5.34	-1.36	0.0567	1
chr8	7242780	7243280	*	1.77	-0.37	2.59	-2.97	0.0568	1
chr2	159904348	159904848	*	5.37	4.86	5.74	-0.89	0.057	1
chr22	50624515	50625015	*	4.7	4.02	5.16	-1.14	0.0574	1
chr7	28975187	28975687	*	4.39	3.66	4.86	-1.2	0.0575	1
chr8	143657869	143658369	*	4.07	3.2	4.6	-1.4	0.0576	1
chr2	100554707	100555207	*	3.31	4.02	1.82	2.2	0.0577	1
chr19	14269257	14269757	*	4.5	3.85	4.95	-1.1	0.0578	1
chr16	882471	883462	*	5.29	4.72	5.7	-0.98	0.0578	1
chr7	19405911	19406411	*	4.54	5.04	3.77	1.26	0.0579	1
chr5	79083283	79083783	*	4.61	3.93	5.07	-1.13	0.0579	1
chr20	58356231	58356731	*	5.29	4.71	5.7	-0.99	0.0582	1
chr20	56280840	56281340	*	4.09	3.25	4.62	-1.37	0.0582	1
chr9	140316838	140317338	*	4.53	3.91	4.97	-1.06	0.0582	1
chr1	31853364	31853864	*	4.63	3.93	5.09	-1.17	0.0583	1
chr10	554630	555130	*	4.28	3.57	4.75	-1.17	0.0583	1
chr11	47453204	47453704	*	4.45	3.55	5	-1.44	0.0591	1
chr16	68053423	68053923	*	4.51	3.86	4.95	-1.09	0.0595	1
chr11	44570985	44571485	*	5.13	5.57	4.49	1.08	0.0597	1
chr3	52466250	52466750	*	3.77	2.7	4.38	-1.68	0.0598	1
chr7	78588800	78589300	*	4.72	5.16	4.06	1.1	0.0599	1
chr1	121354776	121355276	*	1.81	-0.37	2.64	-3.01	0.0599	1
chr19	18559249	18559749	*	5.28	4.79	5.65	-0.87	0.0604	1
chr9	139848978	139849478	*	5.84	5.34	6.21	-0.87	0.0609	1
chr17	19647871	19648371	*	5.26	4.72	5.65	-0.93	0.0611	1
chr16	1097643	1098143	*	5.56	4.91	6	-1.1	0.0612	1
chr22	50750442	50750942	*	4.22	3.37	4.75	-1.38	0.0618	1
chr1	21508532	21509032	*	3.89	2.85	4.49	-1.64	0.0623	1
chr2	241817846	241818346	*	5.23	4.61	5.66	-1.05	0.0628	1
chr20	46599029	46599529	*	3.57	2.22	4.26	-2.04	0.0628	1
chr11	65547691	65548191	*	3.65	2.49	4.28	-1.8	0.063	1
chr6	3885775	3886275	*	4.82	4.24	5.23	-0.99	0.0634	1
chr17	5438603	5439103	*	4.92	5.33	4.34	0.99	0.0634	1
chr19	19043641	19044141	*	5.25	4.68	5.65	-0.98	0.0636	1
chr10	22475238	22475738	*	5.06	4.43	5.5	-1.07	0.0637	1
chr5	858115	858615	*	2.58	1.03	3.31	-2.28	0.0637	1
chr22	44614021	44614521	*	5.89	5.38	6.27	-0.89	0.0641	1
chr16	14466478	14466978	*	5.66	5.14	6.05	-0.9	0.0643	1
chr18	77506325	77506825	*	3.15	1.83	3.82	-1.99	0.0648	1
chr11	9357564	9358064	*	5.71	5.17	6.11	-0.94	0.065	1
chr1	33501954	33502454	*	4.65	3.93	5.13	-1.2	0.065	1
chr8	144102243	144102743	*	5.18	4.62	5.58	-0.96	0.0653	1
chr5	31378895	31379395	*	4.47	4.96	3.73	1.22	0.0665	1
chr17	49723936	49724436	*	3.6	4.16	2.66	1.5	0.0665	1
chr11	61505501	61506001	*	4.8	4.19	5.23	-1.04	0.0666	1
chr18	76130535	76131035	*	1.51	-0.37	2.3	-2.68	0.0666	1
chr19	43809952	43810452	*	4.46	5	3.59	1.41	0.0667	1
chr10	71470928	71471428	*	4.58	3.91	5.03	-1.12	0.0669	1
chr3	128278260	128278760	*	4.51	3.81	4.98	-1.17	0.067	1
chr20	1398978	1399478	*	3.4	4.03	2.24	1.79	0.0677	1
chr17	62080448	62080948	*	5.28	4.72	5.68	-0.96	0.0679	1
chr22	32595709	32596209	*	3.87	3.06	4.39	-1.33	0.0681	1
chr22	18297267	18297767	*	2.1	0.29	2.88	-2.59	0.0682	1
chr8	11448758	11449258	*	5.89	5.38	6.27	-0.89	0.0682	1
chr22	39239934	39240434	*	5.63	5.01	6.07	-1.06	0.0683	1
chr7	4873659	4874159	*	3.62	2.71	4.17	-1.47	0.0684	1
chr16	29129621	29130121	*	3.1	1.89	3.75	-1.86	0.0688	1
chr20	61346531	61347031	*	5.93	5.46	6.28	-0.81	0.069	1
chr16	75276106	75276606	*	4.5	3.86	4.93	-1.07	0.0692	1
chr16	1588203	1588703	*	4.34	3.67	4.8	-1.13	0.0695	1
chr3	122631031	122631531	*	4.44	3.78	4.89	-1.11	0.07	1
chr4	68265361	68265861	*	5.38	4.82	5.78	-0.96	0.0701	1
chr5	179804404	179804904	*	3.77	2.72	4.36	-1.64	0.0705	1
chr16	19008365	19008865	*	5.01	4.45	5.4	-0.95	0.0711	1
chr10	43478894	43479394	*	4.66	3.95	5.13	-1.18	0.0714	1
chr19	14680489	14680989	*	4.68	4.06	5.11	-1.04	0.0715	1
chr22	43130388	43130888	*	5.28	4.65	5.72	-1.07	0.0718	1
chr19	33616969	33617469	*	3.77	4.42	2.56	1.86	0.0719	1
chr12	131043009	131043509	*	5.33	4.74	5.75	-1.01	0.072	1
chr10	43726417	43726917	*	5.37	4.87	5.75	-0.88	0.0722	1
chr17	71535854	71536354	*	3.91	2.97	4.47	-1.51	0.0723	1
chr8	145059878	145060378	*	5.28	4.72	5.68	-0.96	0.0725	1
chr14	105799588	105800088	*	5.48	4.96	5.86	-0.89	0.0725	1
chr8	143900286	143900786	*	3.98	3.09	4.53	-1.44	0.0726	1
chr1	29811662	29812162	*	5.34	4.87	5.7	-0.83	0.0726	1
chr15	91194462	91194962	*	3.7	2.39	4.37	-1.98	0.0727	1
chr20	61077233	61077733	*	5.13	4.5	5.56	-1.07	0.0733	1
chr17	73498392	73498892	*	5.54	4.98	5.95	-0.97	0.0735	1
chr1	55025408	55025908	*	4.58	3.99	5	-1.01	0.0737	1
chr5	151075788	151076288	*	4.67	3.87	5.19	-1.32	0.0738	1
chr3	112520392	112520892	*	4.65	5.09	4.02	1.07	0.0738	1
chr7	97803688	97804188	*	5.29	4.79	5.66	-0.87	0.074	1
chr11	69826800	69827300	*	3.94	2.95	4.53	-1.57	0.074	1
chr22	39664826	39665326	*	5.28	4.8	5.63	-0.83	0.0743	1
chr17	47987984	47988484	*	3.4	4.09	2.04	2.05	0.0743	1
chr2	42984135	42984635	*	4.53	3.85	4.99	-1.14	0.0745	1
chr16	65697950	65698450	*	5.79	6.15	5.31	0.84	0.0748	1
chr16	89120931	89121431	*	5.34	4.71	5.77	-1.06	0.0749	1
chr16	87881334	87881834	*	5.13	4.54	5.55	-1.02	0.0751	1
chr3	51997754	51998254	*	6.58	6.07	6.95	-0.88	0.0752	1
chr7	150488848	150489348	*	5.34	4.83	5.72	-0.88	0.0753	1
chr14	105257343	105257843	*	3.98	3.05	4.54	-1.49	0.0754	1
chr2	95857074	95857574	*	4.28	3.31	4.86	-1.55	0.0755	1
chr8	22240944	22241444	*	5.12	4.64	5.48	-0.84	0.0757	1
chr4	6385599	6386099	*	6.2	5.75	6.54	-0.8	0.076	1
chr6	43919281	43919781	*	5.01	4.45	5.41	-0.96	0.0763	1
chr17	35181073	35181573	*	4.9	4.32	5.31	-1	0.0763	1
chr2	54406632	54407132	*	3.38	4.09	1.94	2.15	0.0765	1
chr20	62650870	62651370	*	5.2	4.71	5.57	-0.86	0.0765	1
chr20	46523324	46523824	*	5.23	4.62	5.65	-1.02	0.0767	1
chr14	24303873	24304373	*	3.95	4.48	3.11	1.37	0.0771	1
chr7	64096824	64097324	*	5.36	4.91	5.7	-0.79	0.0772	1
chr5	16420907	16421407	*	3.38	2.27	4	-1.73	0.0774	1
chr7	157783017	157783517	*	4.86	4.19	5.32	-1.13	0.0774	1
chr1	38521499	38521999	*	4.66	4.08	5.08	-1.01	0.0776	1
chr14	74777937	74778437	*	4.79	4.17	5.22	-1.05	0.0778	1
chr8	216194	216694	*	3.8	2.96	4.32	-1.36	0.0779	1
chr22	45466295	45466795	*	3.96	3.07	4.51	-1.44	0.0779	1
chr6	150357428	150357928	*	4.98	4.43	5.37	-0.95	0.0781	1
chr21	46816367	46816867	*	4.81	4.28	5.19	-0.91	0.0781	1
chr18	46380917	46381417	*	5.2	4.58	5.63	-1.04	0.0781	1
chr3	194054174	194054674	*	5.05	4.54	5.44	-0.9	0.0784	1
chr5	179113857	179114357	*	4.78	4.14	5.23	-1.08	0.0785	1
chr22	46515403	46515903	*	4.97	4.29	5.43	-1.14	0.0786	1
chr6	167764712	167765212	*	5.02	4.48	5.41	-0.93	0.0789	1
chr2	30370117	30370617	*	4.17	3.31	4.71	-1.4	0.0791	1
chr5	176273581	176274081	*	4.56	3.92	5.01	-1.09	0.0792	1
chr17	78092219	78092719	*	4.87	4.26	5.3	-1.04	0.0794	1
chr8	142109220	142109720	*	4.12	3.23	4.67	-1.43	0.08	1
chr19	1164887	1165387	*	4.1	3.3	4.61	-1.31	0.0805	1
chr17	62022506	62023006	*	4.62	4.03	5.04	-1	0.0807	1
chr7	75407935	75408435	*	4.61	4.04	5.02	-0.97	0.0807	1
chr5	139144328	139144828	*	4.8	4.27	5.18	-0.91	0.0808	1
chr5	1162450	1162950	*	4.23	3.54	4.7	-1.16	0.0809	1
chr9	95874635	95875135	*	4.8	4.29	5.18	-0.89	0.081	1
chr1	206858737	206859237	*	5.5	4.96	5.89	-0.93	0.0811	1
chr14	101920577	101921077	*	4.45	3.64	4.97	-1.34	0.0813	1
chr10	131766423	131766923	*	5.04	4.52	5.42	-0.9	0.0813	1
chr17	21428962	21429462	*	5.03	4.46	5.44	-0.98	0.0818	1
chr19	6005753	6006253	*	4.42	3.79	4.86	-1.07	0.0818	1
chr19	48806768	48807268	*	5.64	5.12	6.03	-0.91	0.0819	1
chr15	77945322	77945822	*	4.35	3.69	4.8	-1.11	0.082	1
chr5	61639090	61639590	*	3.95	4.56	2.9	1.65	0.0822	1
chr22	30955780	30956280	*	4.14	3.24	4.68	-1.44	0.0824	1
chr9	137274977	137275477	*	5.63	5.11	6.01	-0.89	0.0828	1
chr7	45583037	45583537	*	5.32	4.83	5.68	-0.85	0.0829	1
chr1	153662703	153663203	*	4.76	4.11	5.21	-1.1	0.0834	1
chr20	61161171	61161671	*	5.1	4.56	5.5	-0.94	0.084	1
chr17	54307045	54307545	*	4.46	4.95	3.73	1.22	0.0847	1
chr17	43237817	43238317	*	4.67	4.08	5.09	-1	0.0849	1
chr4	8100953	8101453	*	5.64	5.1	6.02	-0.92	0.085	1
chr17	29062676	29063176	*	3.91	3.03	4.45	-1.42	0.0853	1
chr14	74785416	74785916	*	3.47	2.28	4.12	-1.84	0.0854	1
chr17	22258988	22259488	*	5.37	5.75	4.86	0.89	0.0856	1
chr1	142691407	142691907	*	1.37	-0.37	2.14	-2.51	0.0859	1
chr22	20307763	20308263	*	5.44	4.84	5.86	-1.01	0.086	1
chr2	218517943	218518443	*	5.15	5.54	4.62	0.92	0.0862	1
chr4	9162188	9162688	*	4.76	4.21	5.15	-0.94	0.0863	1
chr22	50690298	50690798	*	6.82	6.38	7.15	-0.77	0.0864	1
chr2	75652177	75652677	*	5.03	4.44	5.45	-1.01	0.0874	1
chr17	19583731	19584231	*	4.67	4.12	5.07	-0.95	0.0875	1
chr11	63869518	63870018	*	4.98	4.38	5.4	-1.02	0.0876	1
chr19	6821761	6822261	*	4.03	3.26	4.53	-1.28	0.0877	1
chr4	126443902	126444402	*	4.41	3.8	4.84	-1.04	0.0878	1
chr18	72200240	72200740	*	4.05	3.16	4.59	-1.43	0.0887	1
chr19	17766253	17766753	*	5.21	4.75	5.56	-0.81	0.0887	1
chr9	138300768	138301268	*	4.98	5.37	4.42	0.95	0.0891	1
chr14	50441867	50442367	*	4.03	4.63	2.98	1.64	0.0892	1
chr16	88352311	88352811	*	3.39	2.33	3.99	-1.66	0.0893	1
chr20	61266551	61267051	*	4.82	5.24	4.23	1	0.0895	1
chr1	17027543	17028043	*	4.79	4.19	5.21	-1.02	0.0898	1
chr8	43094146	43094646	*	5.62	5.2	5.94	-0.74	0.09	1
chr1	23069533	23070033	*	5.11	4.61	5.47	-0.87	0.0901	1
chr17	80579049	80579549	*	3.33	2.33	3.91	-1.58	0.0908	1
chr2	48937611	48938111	*	4.22	3.4	4.74	-1.34	0.0908	1
chr2	26404979	26405479	*	5.52	5.06	5.86	-0.8	0.0908	1
chr21	43498520	43499020	*	2.35	1.03	3.03	-2	0.0909	1
chr11	110210246	110210746	*	3.98	4.51	3.13	1.38	0.0912	1
chr1	10387059	10387559	*	5.06	4.53	5.45	-0.92	0.0916	1
chr2	112750653	112751153	*	5.25	4.66	5.67	-1.01	0.0918	1
chr1	154961855	154962355	*	4.49	3.87	4.92	-1.06	0.092	1
chr20	61913176	61913676	*	5.61	5.16	5.95	-0.79	0.0922	1
chr22	18878334	18878834	*	2.88	1.44	3.58	-2.15	0.0923	1
chr19	54804928	54805428	*	4.62	3.96	5.07	-1.11	0.0924	1
chr10	111162566	111163066	*	4.13	4.61	3.41	1.21	0.0927	1
chr1	55985524	55986024	*	4.61	3.97	5.05	-1.07	0.0927	1
chr4	147486613	147487113	*	4.68	4.17	5.06	-0.89	0.0927	1
chr2	23926813	23927313	*	4.72	4.16	5.12	-0.96	0.0927	1
chr17	73738231	73738731	*	3.35	2.12	4	-1.89	0.093	1
chr10	43447201	43447701	*	4.63	4.03	5.06	-1.03	0.0932	1
chr9	137229189	137229689	*	3.32	2.25	3.93	-1.68	0.0933	1
chr20	37075502	37076002	*	4.54	3.77	5.04	-1.27	0.0943	1
chrX	153673823	153674323	*	3.89	3.14	4.38	-1.23	0.0944	1
chrX	122473387	122473887	*	4.7	4.15	5.1	-0.95	0.0944	1
chr3	196020843	196021343	*	5.17	4.71	5.51	-0.81	0.0945	1
chr16	12416808	12417308	*	5.7	5.29	6.02	-0.74	0.0946	1
chr3	52547204	52547704	*	4.21	3.43	4.71	-1.28	0.095	1
chr5	177652198	177652698	*	5.04	4.56	5.4	-0.84	0.0955	1
chr10	81016998	81017498	*	5.05	4.57	5.41	-0.85	0.0956	1
chr11	75484654	75485154	*	4.4	4.91	3.62	1.29	0.0956	1
chr22	45068603	45069103	*	4.06	3.29	4.56	-1.27	0.0957	1
chr2	102884280	102884780	*	5.04	4.59	5.39	-0.81	0.096	1
[truncated: 29,841 more rows]

## Sheet: 17α-E2(10nM) vs 17β-E2(10nM)
seqnames	start	end	strand	Conc	Conc_17a_10nm	Conc_17b_10nm	Fold	p.value	FDR
[truncated: 30,158 more rows]

[truncated: 1 more sheets: 17α-E2(100nM) vs  17β-E2(10nM) ]
