# Supplementary figures and images for: Health benefits attributed to 17α-estradiol, a lifespan-extending compound, are mediated through estrogen receptor α
Source: eLife journal article supplement (doi:10.7554/elife.59616), 2020-12-08

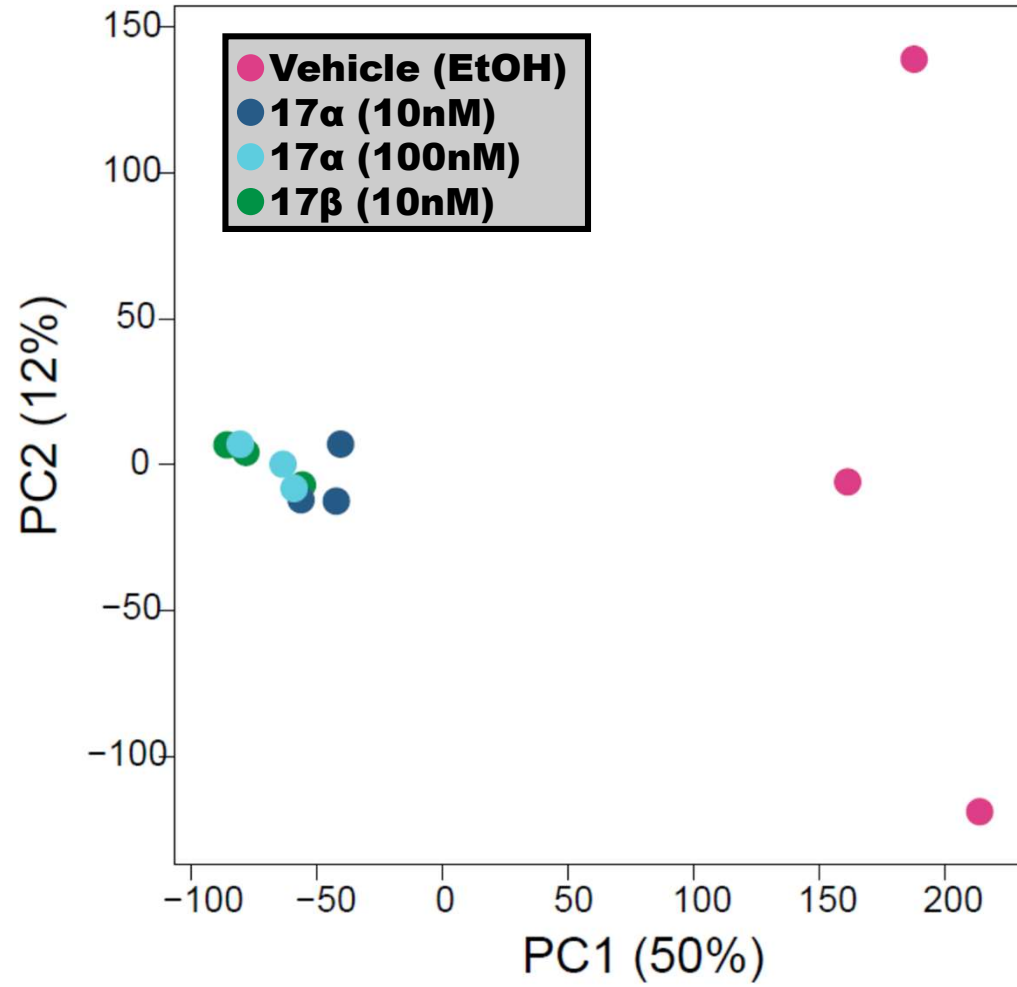

Supplement: supp [file elife-59616-supp-v1.zip › elife_poa_e59616_Figure_1_figure_supplement_1.pdf]

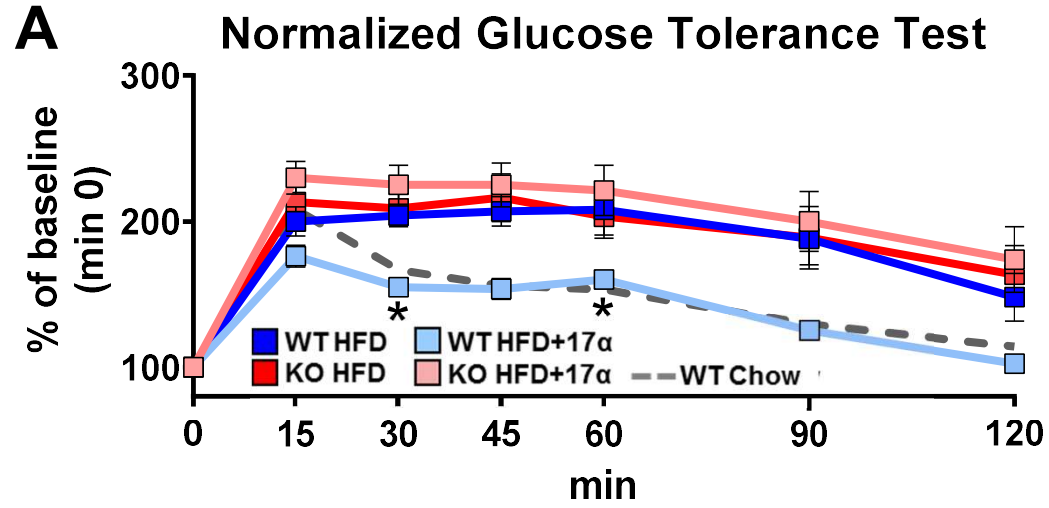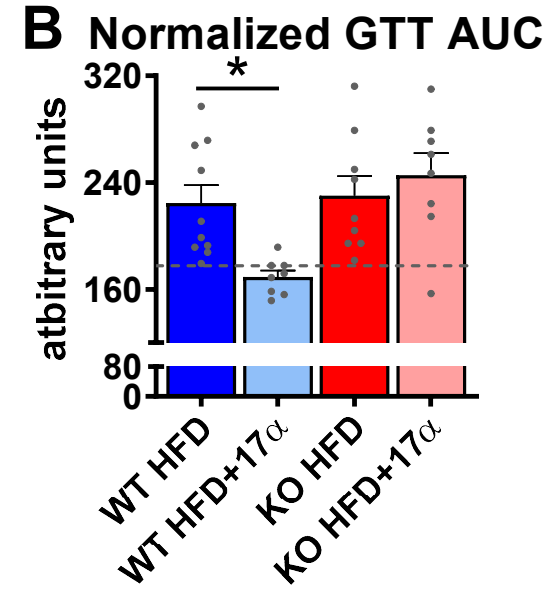

Supplement: supp [file elife-59616-supp-v1.zip › elife_poa_e59616_Figure_3_figure_supplement_1.pdf]

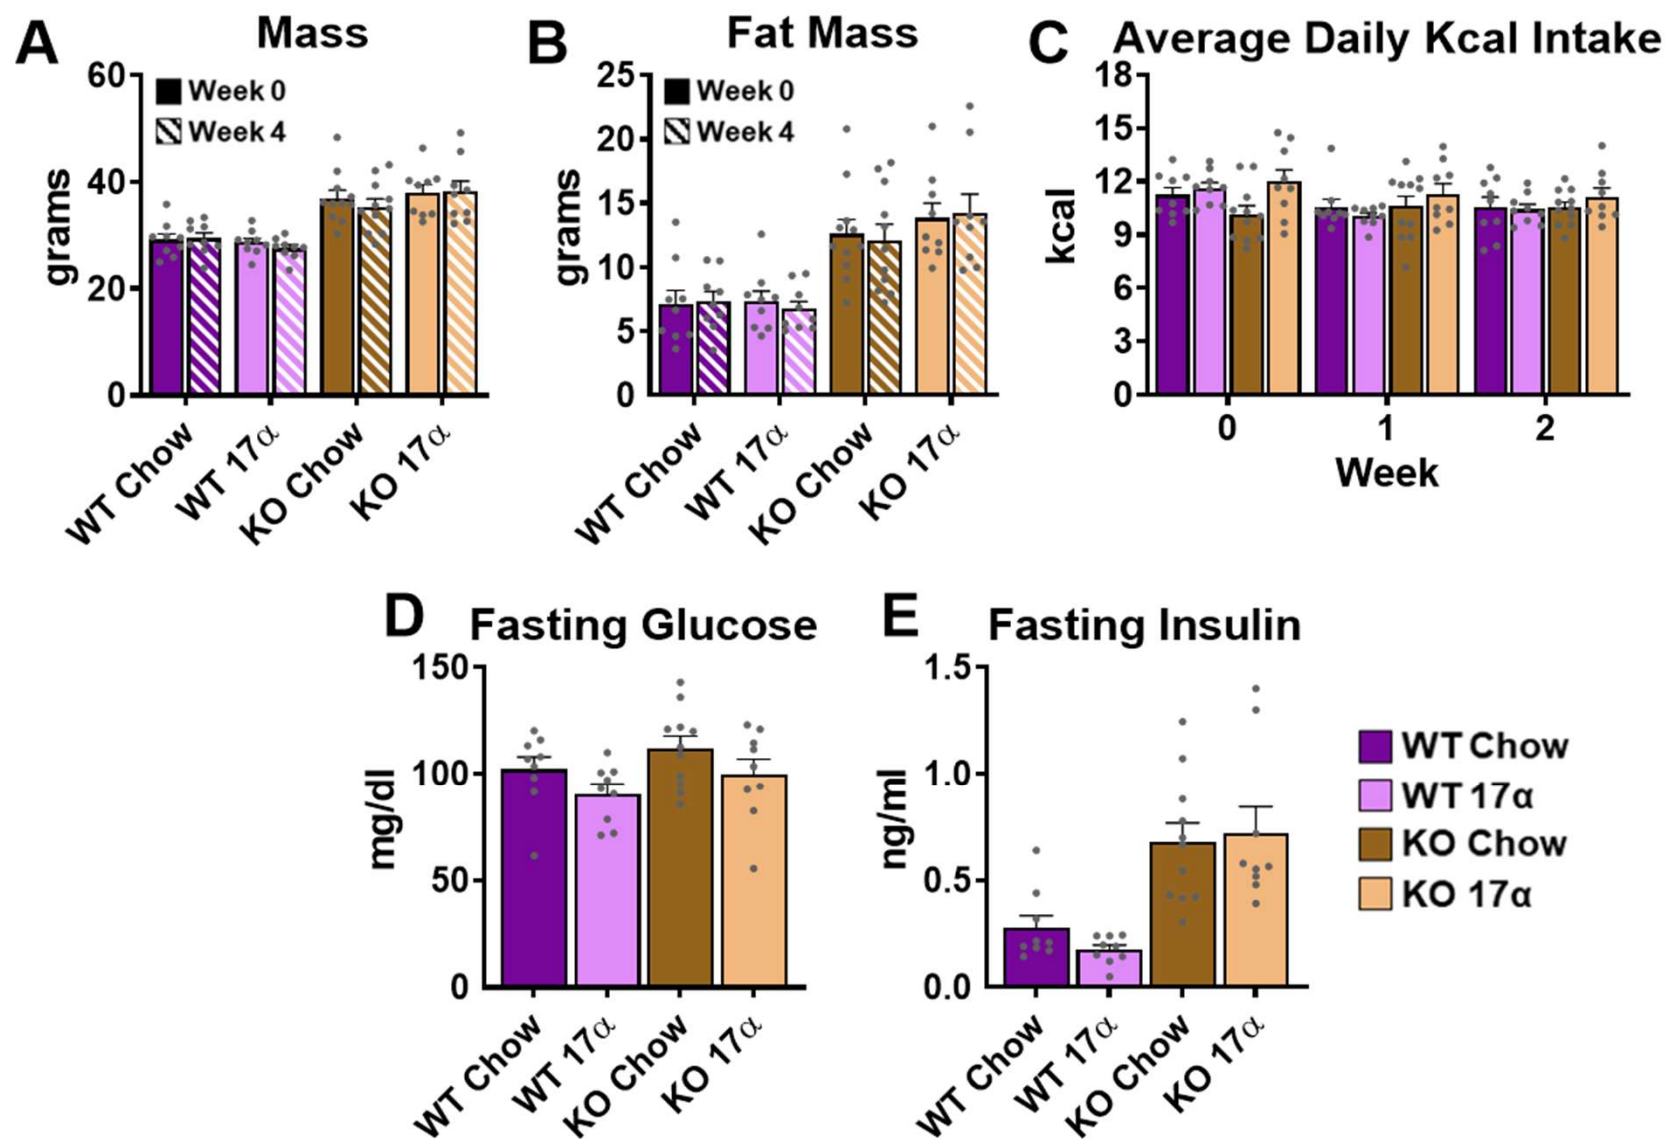

Supplement: supp [file elife-59616-supp-v1.zip › elife_poa_e59616_Figure_3_figure_supplement_2.pdf]

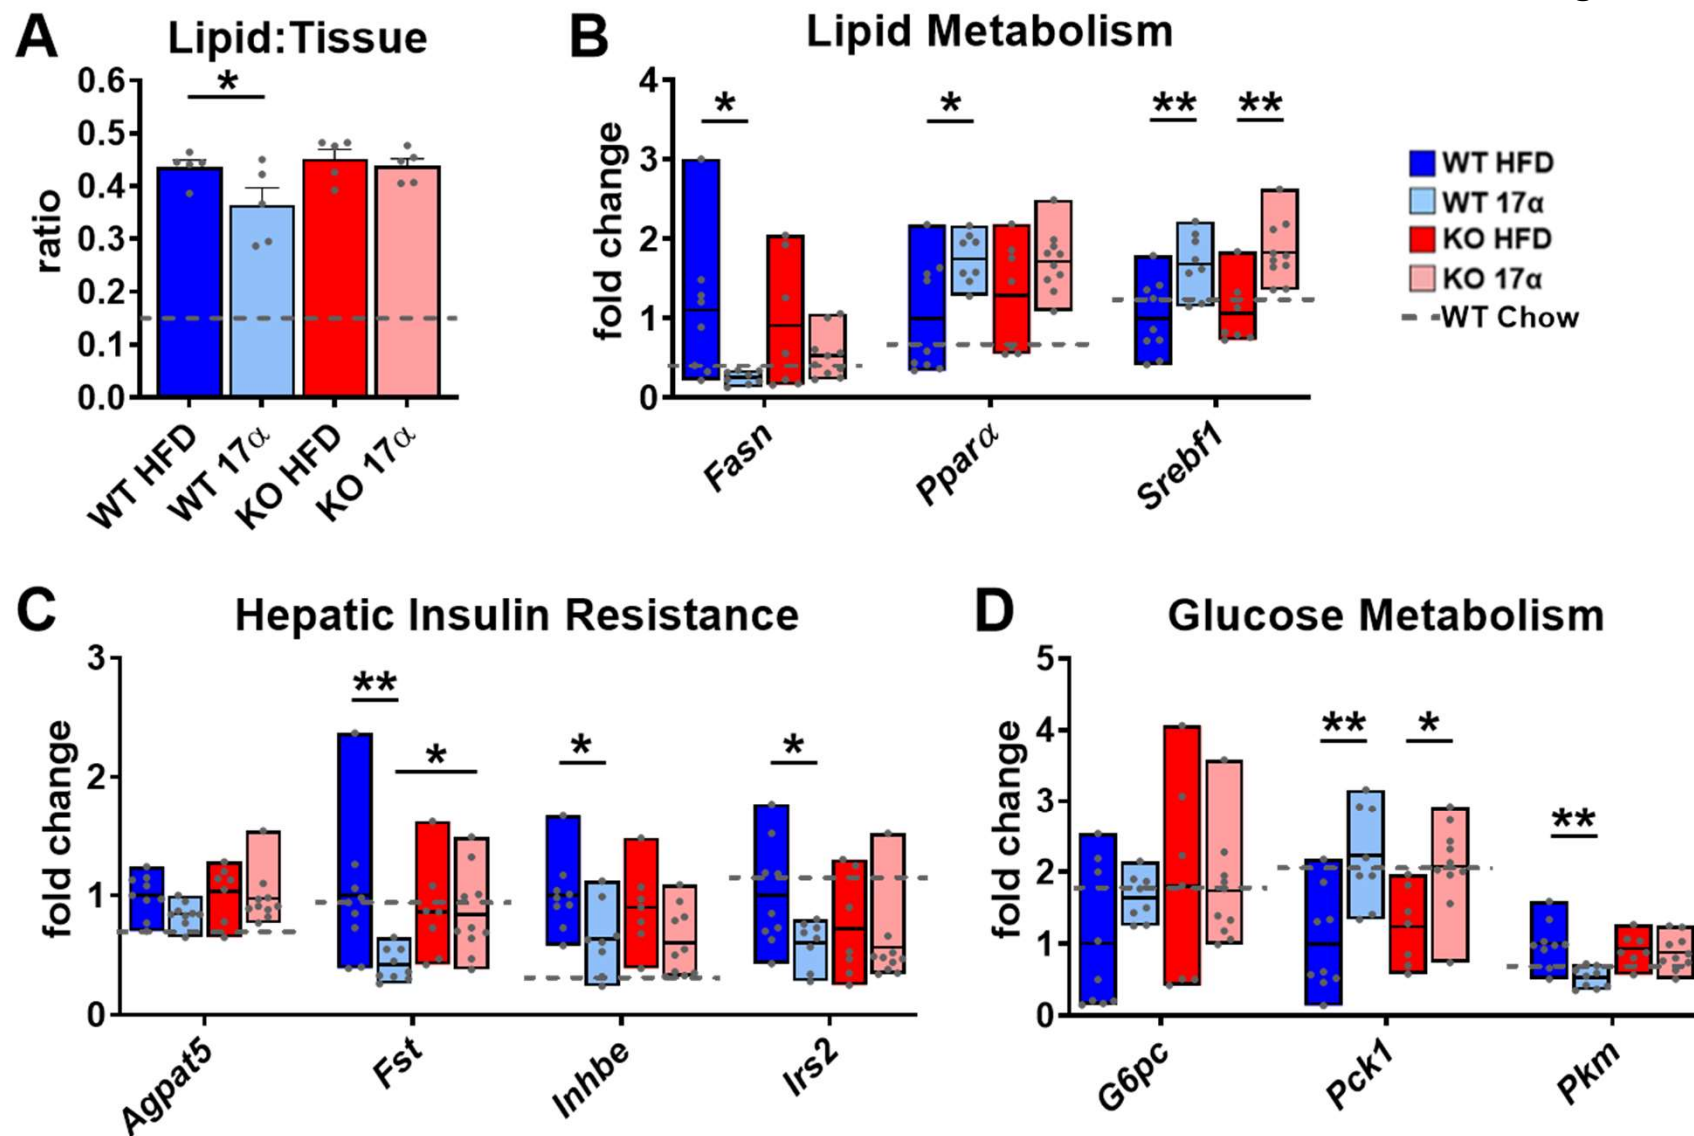

Supplement: supp [file elife-59616-supp-v1.zip › elife_poa_e59616_Figure_4_figure_supplement_1.pdf]

## Liver Fatty Acid Profile

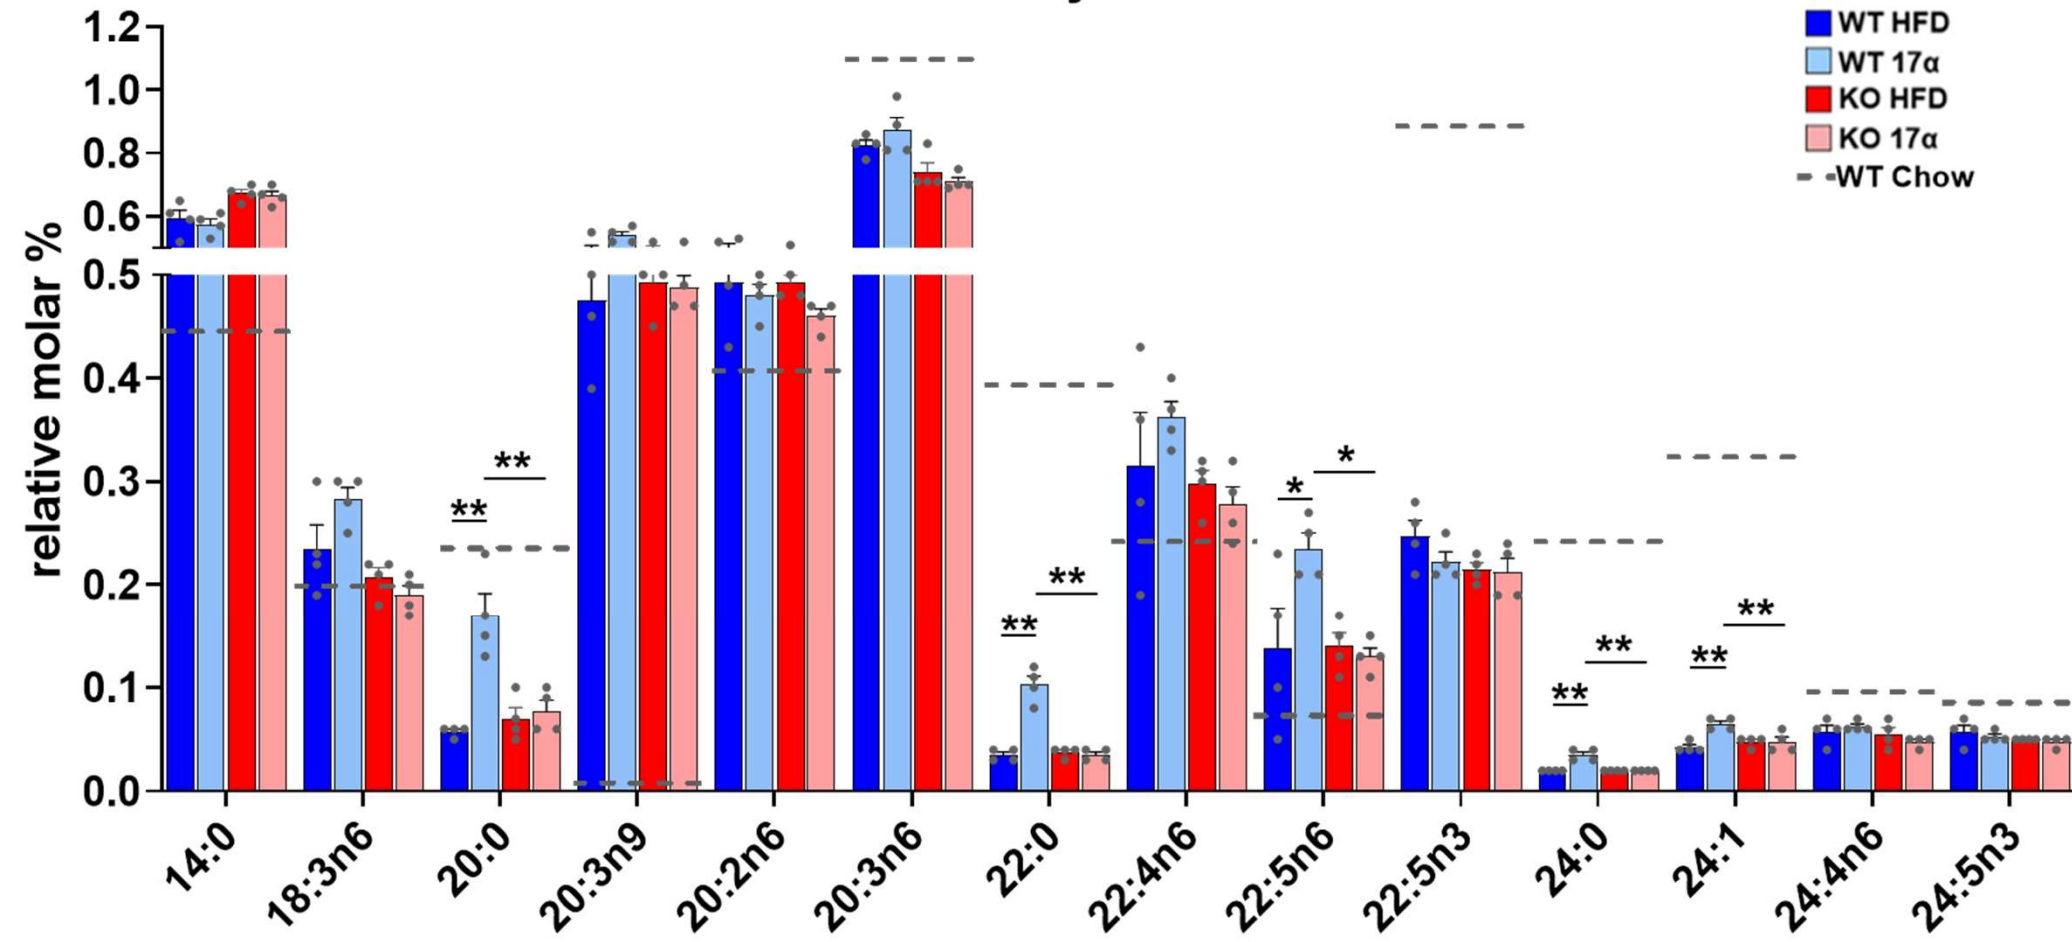

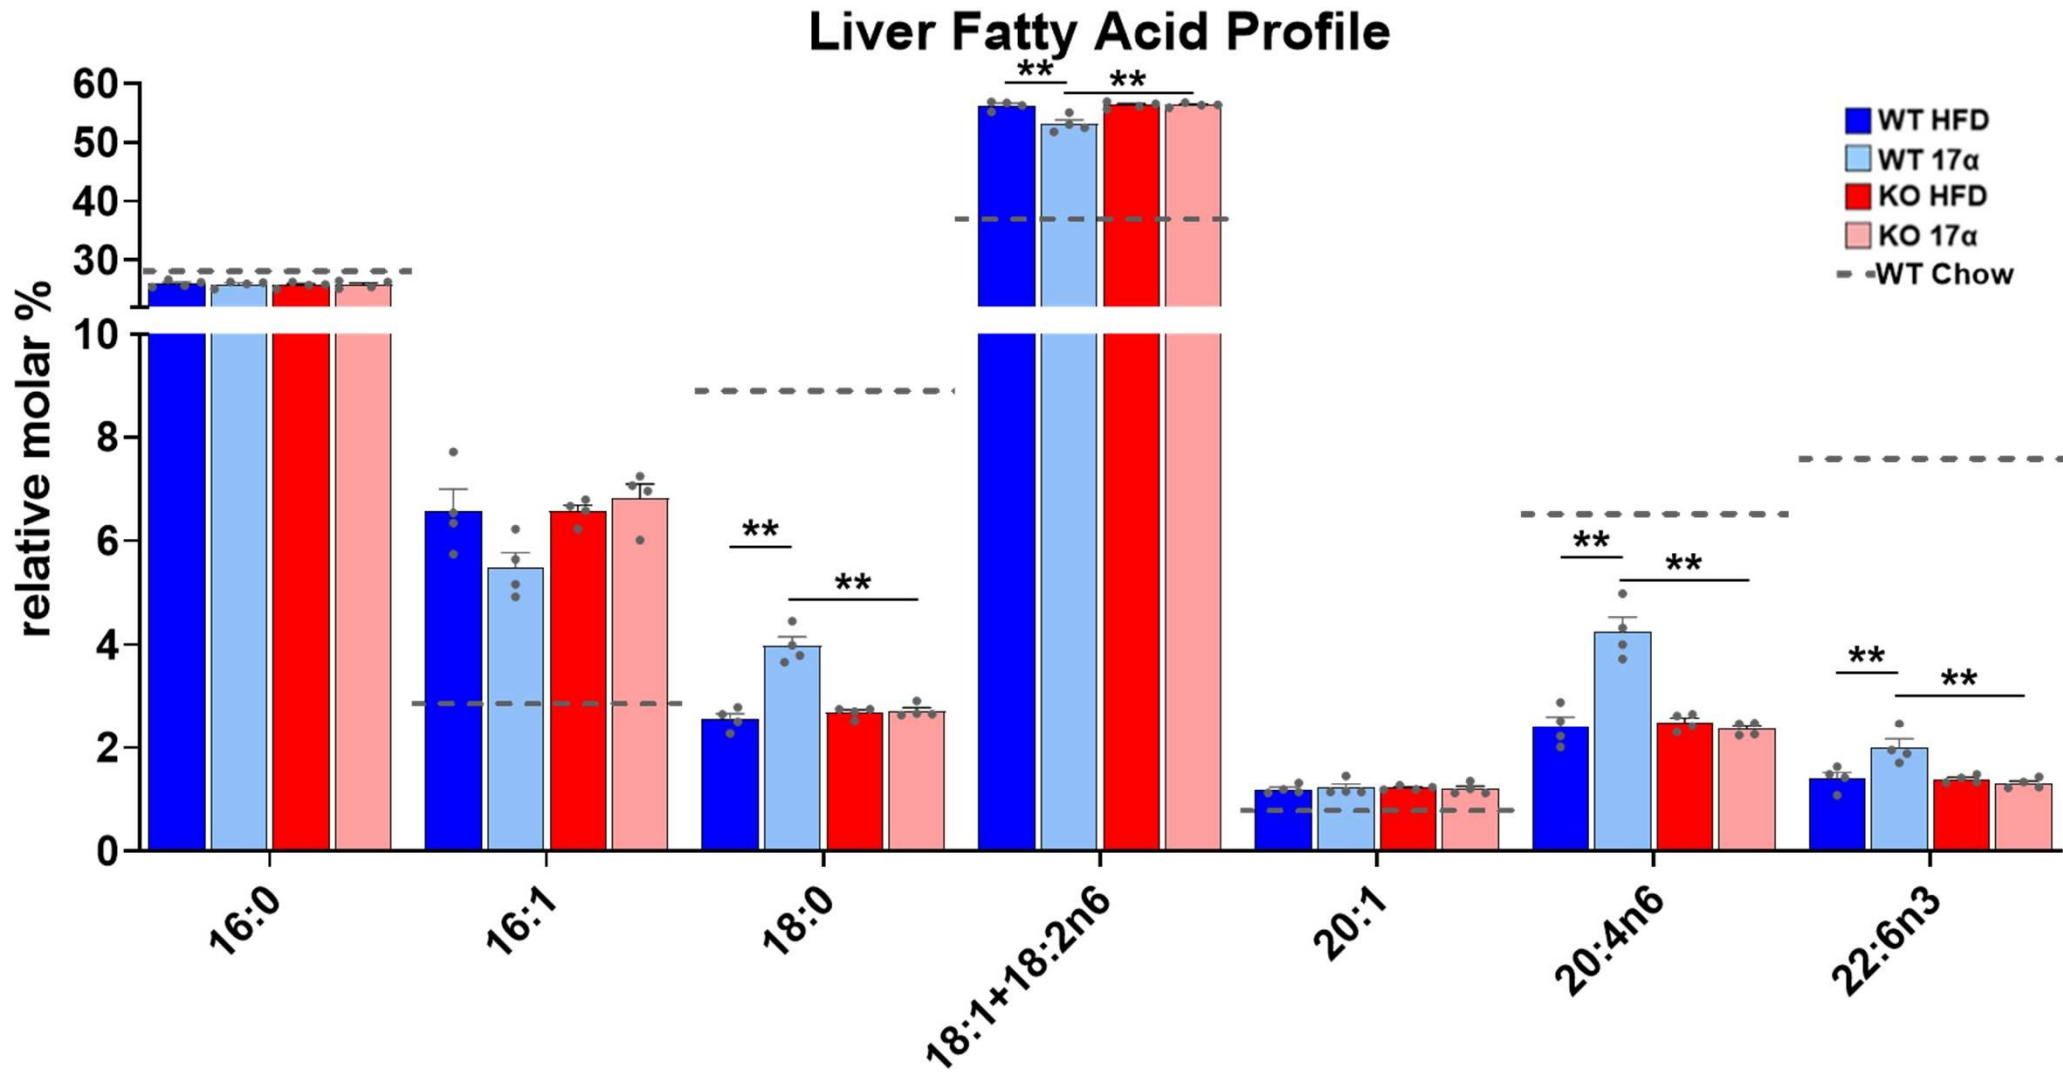

Supplement: supp [file elife-59616-supp-v1.zip › elife_poa_e59616_Figure_4_figure_supplement_2.pdf]
